# Supplementary material
Source: PubMed Central journal article supplement (PMC3959199)

# THE LANCET

## Supplementary appendix

This appendix formed part of the original submission and has been peer reviewed. We post it as supplied by the authors.

Supplement to: The Global Burden of Metabolic Risk Factors for Chronic Diseases Collaboration (BMI Mediated Effects). Metabolic mediators of the effects of body-mass index, overweight, and obesity on coronary heart disease and stroke: a pooled analysis of 97 prospective cohorts with 1·8 million participants. *Lancet* 2013; published online Nov 22. [http://dx.doi.org/10.1016/S0140-6736\(13\)61836-X](http://dx.doi.org/10.1016/S0140-6736(13)61836-X).

## Webmaterials

### Table of contents

|                                                                                                                                                                   |    |
|-------------------------------------------------------------------------------------------------------------------------------------------------------------------|----|
| <b>Webappendix 1.</b> Cohort identification and selection .....                                                                                                   | 2  |
| <b>Webappendix 2.</b> Estimating the uncertainty of percentage of excess risk mediated .....                                                                      | 5  |
| <b>Webtable 1:</b> Correlation between $HR_{(\text{confounder adjusted})}$ and $HR_{(\text{confounder and mediator adjusted})}$ on log scale from 7 cohorts ..... | 6  |
| <b>Webtable 2:</b> Characteristics of cohorts included in the pooled analysis.....                                                                                | 8  |
| <b>Webtable 3:</b> Stratified analyses of hazard ratios (HRs) for overweight and obesity vs. normal weight .....                                                  | 15 |
| <b>Webfigure 1:</b> Flow diagram for articles identified and retained in Medline and Embase.....                                                                  | 17 |
| <b>Webfigure 2:</b> Cohort-specific hazard ratios (HRs) of CHD per 5 kg/m <sup>2</sup> higher BMI.....                                                            | 19 |
| <b>Webfigure 3:</b> Cohort-specific hazard ratios (HRs) of stroke per 5 kg/m <sup>2</sup> higher BMI .....                                                        | 28 |
| <b>Webfigure 4:</b> Cohort-specific hazard ratios (HRs) of CHD for overweight vs. normal weight.....                                                              | 37 |
| <b>Webfigure 5:</b> Cohort-specific hazard ratios (HRs) of stroke for overweight vs. normal weight .....                                                          | 46 |
| <b>Webfigure 6:</b> Cohort-specific hazard ratios (HRs) of CHD for obesity vs. normal weight .....                                                                | 55 |
| <b>Webfigure 7:</b> Cohort-specific hazard ratios (HRs) of stroke for obesity vs. normal weight.....                                                              | 64 |
| <b>Webfigure 8:</b> Stratified analyses of hazard ratios (HRs) of CHD per 5 kg/m <sup>2</sup> higher BMI.....                                                     | 73 |
| <b>Webfigure 9:</b> Stratified analyses of hazard ratios (HRs) of stroke per 5 kg/m <sup>2</sup> higher BMI.....                                                  | 82 |

## **Webappendix 1. Cohort identification and selection**

We identified cohorts through a systematic literature search of the Medline (PubMed) and Embase databases, through the National Heart, Lung, and Blood Institute (NHLBI) in the United States; and through personal communication with researchers.

### *Medline search*

We searched Medline (via PubMed) for articles published up to 23 March 2010, with no restrictions on publication language. PubMed was searched based on a combination of three themes, using both exploded version of Medical Subject Heading (MeSH) terms and text word. The first theme included various measures of adiposity, such as body mass index, waist circumference, waist-to-hip ratio, overweight and obesity. The second theme consisted of different cardiovascular outcomes of interest, in particular CHD and stroke. And the third theme was used to restrict articles to prospective studies.

The query appeared as ("overweight "[Mesh] OR "obesity"[tiab] OR "obese"[tiab] OR "overweight"[tiab] OR "Body Mass Index"[Mesh] OR "body mass index"[tiab] OR "BMI"[tiab] OR "Waist-Hip Ratio"[Mesh] OR "Waist-Hip Ratio"[tiab] OR "Waist-to-hip ratio"[tiab] OR "Waist Circumference"[Mesh] OR "Waist Circumference"[tiab] OR "adiposity"[Mesh] OR "adiposity"[tiab]) AND ( ("Coronary Disease"[Mesh] OR "Coronary Heart Disease"[tiab] OR "Coronary Disease"[tiab] OR "Coronary Aneurysm"[tiab] OR "Coronary Artery Disease"[tiab] OR "Arteriosclerosis"[tiab] OR "atherosclerotic"[tiab] OR "Coronary Occlusions"[tiab] OR "Coronary Occlusion"[tiab] OR "stenosis"[tiab] OR "coronary thrombosis"[tiab] OR "coronary Thromboses"[tiab] OR "Coronary Artery Vasospasm"[tiab] OR "Coronary Artery Vasospasms"[tiab] OR "Coronary Vasospasm"[tiab] OR "Coronary Vasospasms"[tiab] OR "atherosclerotic"[tiab] ) OR ("Stroke"[Mesh] OR

("Cerebrovascular Disorders"[Mesh] AND 1964:1999[pdat]) OR ("Intracranial Arteriosclerosis"[Mesh] AND 1965:1999[pdat]) OR ("Intracranial Embolism and Thrombosis"[Mesh] AND 1965:1999[pdat]) OR "stroke"[tiab] OR "strokes"[tiab] OR "Cerebrovascular Accident"[tiab] OR "Cerebrovascular Accidents"[tiab] OR "vascular accident"[tiab] OR "vascular accidents"[tiab] OR "Apoplexy"[tiab]) OR ("Death, Sudden, Cardiac"[Mesh] OR "Cardiac Sudden Death"[tiab] OR "Sudden Cardiac Death"[tiab] OR "Sudden Cardiac Arrest"[tiab] ) OR ("Congestive Heart Failure"[All Fields] )) AND ("Cohort Studies"[Mesh] OR "cohort"[tiab] OR "longitudinal study"[tiab] OR "longitudinal studies"[tiab] OR "prospective study"[tiab] OR "prospective studies"[tiab] OR "Nested Case-Control Studies"[tiab] OR "Nested Case-Control Study"[tiab] OR "Incidence Studies"[tiab] OR "Incidence Study"[tiab] OR "Concurrent Studies"[tiab] OR "Concurrent Study"[tiab] OR "Follow Up"[tiab] OR random\*)

### *Embase search*

Embase was searched based on a similar strategy using Embase TREE tool (EMTREE) and text word.

The query was ('obesity'/exp OR 'body mass'/exp OR 'waist hip ratio'/exp OR 'waist circumference'/exp OR 'obesity':ab,ti OR 'obese':ab,ti OR 'overweight':ab,ti OR 'body mass index':ab,ti OR 'bmi':ab,ti OR 'waist-hip ratio':ab,ti OR 'waist-to-hip ratio':ab,ti OR 'waist circumference':ab,ti OR 'adiposity':ab,ti) AND (('coronary artery disease'/exp OR 'ischemic heart disease'/exp OR 'coronary disease':ab,ti OR 'coronary artery disease':ab,ti OR 'ischaemic heart disease':ab,ti OR 'ischemia heart disease':ab,ti OR 'ischemic cardiac disease':ab,ti OR 'ischemic cardial disease':ab,ti OR 'coronary artery occlusive disease':ab,ti OR 'coronary heart disease':ab,ti OR 'coronary occlusive disease':ab,ti ) OR ('stroke'/exp OR

'brain hemorrhage'/exp OR 'brain ischemia'/exp OR 'cerebrovascular accident'/exp OR  
 "stroke":ab,ti OR 'strokes':ab,ti OR 'ischaemic stroke':ab,ti OR 'ischemic stroke':ab,ti OR  
 'haemorrhagic stroke':ab,ti OR 'hemorrhagic stroke':ab,ti OR 'Cerebrovascular Accident':ab,ti  
 OR 'Cerebrovascular Accidents':ab,ti OR 'vascular accident':ab,ti OR 'vascular accidents':ab,ti  
 OR 'Apoplexy':ab,ti) OR ('sudden death'/exp OR 'Cardiac Sudden Death':ab,ti OR 'Sudden  
 Cardiac Death':ab,ti OR 'Sudden Cardiac Arrest':ab,ti) OR ('congestive heart failure'/exp OR  
 'cardiac congestive failure':ab,ti OR 'congestive cardiac failure':ab,ti OR 'heart failure':ab,ti) )  
 AND ('cohort analysis'/exp OR 'follow up'/exp OR 'intervention study'/exp OR 'longitudinal  
 study'/exp OR 'prospective study'/exp OR 'cohort':ab,ti OR 'longitudinal study':ab,ti OR  
 'longitudinal studies':ab,ti OR 'prospective study':ab,ti OR 'prospective studies':ab,ti OR  
 'Nested Case-Control Studies':ab,ti OR 'Nested Case-Control Study':ab,ti OR 'Incidence  
 Studies':ab,ti OR 'Incidence Study':ab,ti OR 'Concurrent Studies':ab,ti OR 'Concurrent  
 Study':ab,ti OR 'Follow Up':ab,ti OR random\*)

Published articles were evaluated by two reviewers (YL, KH) first at the title and abstract stage, followed by a full text screening. The number of articles identified and retained is summarised in Webfigure 1. Cohort studies were considered eligible if they met the following criteria: (1) prospective design with at least 1 year of follow-up; (2) participants were not selected based on prior history of CHD or stroke; (3) height and weight were measured (not self-reported) at baseline; (4) at least one of the mediators (blood pressure, serum cholesterol, and blood glucose or diabetes) was also measured at baseline; (5) fatal and/or non-fatal CHD or stroke were ascertained during follow-up.

**Webappendix 2. Estimating the uncertainty of percentage excess risk mediated (PERM)**

As described in the Methods, we estimated the uncertainty of PERM by randomly drawing 5000 pairs of  $HR_{(\text{confounder adjusted})}$  and  $HR_{(\text{confounder and mediator adjusted})}$  from their corresponding uncertainty distributions while accounting for their correlations. To estimate the correlations between  $HR_{(\text{confounder adjusted})}$  and  $HR_{(\text{confounder and mediator adjusted})}$ , we applied the bootstrap method. We first randomly drew a bootstrap sample of size N with replacement from a selected cohort of the size N, and then fitted Cox proportional hazard models to obtain bootstrap estimate of  $HR_{(\text{confounder adjusted})}$  and  $HR_{(\text{confounder and mediator adjusted})}$  on log scale. The process was repeated 5000 times. The correlations were calculated using the 5000 bootstrap estimates of  $HR_{(\text{confounder adjusted})}$  and  $HR_{(\text{confounder and mediator adjusted})}$ .

The estimated correlations  $HR_{(\text{confounder adjusted})}$  and  $HR_{(\text{confounder and mediator adjusted})}$  on log scale from 7 selected cohorts are summarised in Webtable 1. We used 0.95 as the conservative estimate of this correlation and incorporate it in estimating the uncertainty of percentage excess risks.

**Webtable 1:** Correlation between  $HR_{(\text{confounder adjusted})}$  and  $HR_{(\text{confounder and mediator adjusted})}$  on log scale from 7 cohorts

| <b>Cohort</b>                                   | <b>Model 1 vs.<br/>Model 2</b> | <b>Model 1 vs.<br/>Model 3</b> | <b>Model 1 vs.<br/>Model 4</b> | <b>Model 1 vs.<br/>Model 5</b> | <b>Model 1 vs.<br/>Model 6</b> | <b>Model 1 vs.<br/>Model 7</b> | <b>Model 1 vs.<br/>Model 8</b> |
|-------------------------------------------------|--------------------------------|--------------------------------|--------------------------------|--------------------------------|--------------------------------|--------------------------------|--------------------------------|
| <b>Coronary heart disease</b>                   |                                |                                |                                |                                |                                |                                |                                |
| The Cardiovascular Health Study (CHS)           | 0.984                          | 0.995                          | 0.974                          | 0.981                          | 0.961                          | 0.970                          | 0.959                          |
| Honolulu Heart Program (HHP)                    | 0.962                          | 0.981                          | 0.981                          | 0.944                          | 0.950                          | 0.966                          | 0.935                          |
| Multi-Ethnic Study of Atherosclerosis (MESA)    | 0.989                          | 0.996                          | 0.990                          | 0.985                          | 0.981                          | 0.986                          | 0.978                          |
| Multiple Risk Factor Intervention Trial (MRFIT) | 0.997                          | 0.995                          | 0.982                          | 0.992                          | 0.979                          | 0.976                          | 0.973                          |
| Puerto Rico Heart Health Program (PRHHP)        | 0.968                          | 0.986                          | 0.992                          | 0.957                          | 0.960                          | 0.980                          | 0.950                          |
| Framingham Offspring Study                      | 0.943                          | 0.985                          | 0.950                          | 0.936                          | 0.906                          | 0.951                          | 0.916                          |
| Framingham Heart Study-Cohort                   | 0.937                          | 0.986                          | 0.987                          | 0.930                          | 0.928                          | 0.971                          | 0.920                          |
| <b>Stroke</b>                                   |                                |                                |                                |                                |                                |                                |                                |
| The Cardiovascular Health Study (CHS)           | 0.988                          | 0.997                          | 0.976                          | 0.985                          | 0.964                          | 0.975                          | 0.963                          |
| Honolulu Heart Program (HHP)                    | 0.966                          | 0.992                          | 0.989                          | 0.956                          | 0.956                          | 0.983                          | 0.950                          |
| Multi-Ethnic Study of Atherosclerosis (MESA)    | 0.984                          | 0.997                          | 0.988                          | 0.978                          | 0.969                          | 0.981                          | 0.959                          |
| Multiple Risk Factor Intervention Trial (MRFIT) | 0.996                          | 1.000                          | 0.951                          | 0.995                          | 0.947                          | 0.950                          | 0.946                          |
| Puerto Rico Heart Health Program (PRHHP)        | 0.962                          | 0.994                          | 0.992                          | 0.954                          | 0.960                          | 0.987                          | 0.953                          |
| Framingham Offspring Study                      | 0.956                          | 0.998                          | 0.972                          | 0.955                          | 0.931                          | 0.974                          | 0.933                          |
| Framingham Heart Study-Cohort                   | 0.935                          | 0.998                          | 0.998                          | 0.931                          | 0.935                          | 0.995                          | 0.931                          |

Model 1: adjusted for confounder only

Model 2: adjusted for confounder and blood pressure

Model 3: adjusted for confounder and cholesterol

Model 4: adjusted for confounder and blood glucose

Model 5: adjusted for confounder and blood pressure and cholesterol

Model 6: adjusted for confounder and blood pressure and blood glucose

Model 7: adjusted for confounder and cholesterol and blood glucose

Model 8: adjusted for confounder and blood pressure, cholesterol and blood glucose



**Webtable 2:** Characteristics of cohorts included in the pooled analysis

| Cohort name                                                       | Country       | Baseline study date  | Mean duration or end year of follow-up | No. of participants                                   | Proportion of female(%) | Age range at baseline                                 | Number of event (n) <sup>1</sup>  | Event adjudication | Source of event <sup>4</sup>                                                          | Confounders adjusted <sup>2</sup>                                                                                                                                                                 | Mediators adjusted <sup>3</sup>                |
|-------------------------------------------------------------------|---------------|----------------------|----------------------------------------|-------------------------------------------------------|-------------------------|-------------------------------------------------------|-----------------------------------|--------------------|---------------------------------------------------------------------------------------|---------------------------------------------------------------------------------------------------------------------------------------------------------------------------------------------------|------------------------------------------------|
| Abdominal Aortic Aneurysm Screening Program                       | Australia     | 1996-1998            | 3.2                                    | 8212                                                  | 0                       | 65-84                                                 | IHD (327), stroke (126)           | Unknown            | Most APCSC cohorts used death registries, medical records or self-report <sup>5</sup> | Age, sex, smoking status                                                                                                                                                                          | All combinations of SBP, diabetes              |
| Age 40-programme linked with National Cause of Death Register     | Norway        | 1985-1999            | End of 2009                            | 389571                                                | 52                      | 39-45                                                 | IHD (1781) , stroke (572)         | Not adjudicated    | Death registries                                                                      | Age, sex, smoking status                                                                                                                                                                          | All combinations of SBP, TC, diabetes          |
| Aito Town Study                                                   | Japan         | 1980                 | 16.4                                   | 835                                                   | 58                      | 21-73                                                 | IHD (6), stroke (10)              | Unknown            | Most APCSC cohorts used death registries, medical records or self-report <sup>5</sup> | Age, sex, smoking status                                                                                                                                                                          | All combinations of SBP, TC, diabetes          |
| Akabane Study                                                     | Japan         | 1985                 | 11.2                                   | 1417                                                  | 57                      | 40-69                                                 | IHD (54), stroke (27)             | Unknown            | Most APCSC cohorts used death registries, medical records or self-report <sup>5</sup> | Age, sex, smoking status                                                                                                                                                                          | All combinations of SBP, TC, FPG               |
| Anzhen 02 Cohort Study                                            | China         | 1992                 | 3                                      | 3694                                                  | 50                      | 34-65                                                 | Stroke (13)                       | Unknown            | Most APCSC cohorts used death registries, medical records or self-report <sup>5</sup> | Age, sex, smoking status                                                                                                                                                                          | All combinations of SBP, TC, FPG               |
| Atherosclerosis Risk in Communities Study (ARIC)                  | United States | 1987-1989            | 17                                     | 10981                                                 | 56                      | 45-64                                                 | CHD (1134)                        | Adjudicated        | Medical records, death certificates, autopsy reports                                  | Age, sex, smoking status, race, alcohol intake, physical activity, SES, diet, family history of CHD, baseline menopausal status, baseline hormone therapy use, pack years cigarettes <sup>6</sup> | All combinations of SBP, TC, FPG               |
| Australia Longitudinal Study of Ageing (ALSA)                     | Australia     | 1992                 | 5.7                                    | 870                                                   | 50                      | 65-98                                                 | IHD (31), stroke (22)             | Unknown            | Most APCSC cohorts used death registries, medical records or self-report <sup>5</sup> | Age, sex, smoking status                                                                                                                                                                          | All combinations of SBP, TC                    |
| Beijing Aging Study                                               | China         | 1992                 | 4.8                                    | 1010                                                  | 53                      | 55-92                                                 | Stroke (27)                       | Unknown            | Most APCSC cohorts used death registries, medical records or self-report <sup>5</sup> | Age, sex, smoking status                                                                                                                                                                          | All combinations of SBP, TC, FPG               |
| Beijing Anzhen Cohort Study                                       | China         | 1991                 | 4.3                                    | 6858                                                  | 55                      | 35-92                                                 | IHD (29), stroke (104)            | Unknown            | Most APCSC cohorts used death registries, medical records or self-report <sup>5</sup> | Age, sex, smoking status                                                                                                                                                                          | SBP                                            |
| Beijing Iron and Steel Worker Cohort Study                        | China         | 1974, 1979, 1980     | 13.5                                   | 4400                                                  | 0                       | 35-74                                                 | CHD (83) , stroke (124)           | Adjudicated        | Medical records, death certificates                                                   | Age, smoking status                                                                                                                                                                               | All combinations of SBP, TC                    |
| Busselton Health Study                                            | Australia     | 1966-1981            | 24.1                                   | 3863                                                  | 51                      | 20-94                                                 | IHD (897), stroke (475)           | Not adjudicated    | Medical records, death registries                                                     | Age, sex, smoking status                                                                                                                                                                          | All combinations of SBP, TC                    |
| Busselton Health Study, phase II                                  | Australia     | 1994-1995            | 14                                     | 4492                                                  | 56                      | 18-97                                                 | CHD (433)                         | Not adjudicated    | Medical records, death registries                                                     | Age, sex, smoking status                                                                                                                                                                          | All combinations of SBP, TC, FPG               |
| Canada Nutrition Database                                         | Canada        | 1970-1972            | 22                                     | 9575                                                  | 55                      | 18-99                                                 | CHD (764)                         | Not adjudicated    | Death registries                                                                      | Age, sex, smoking status, race, alcohol intake, SES                                                                                                                                               | All combinations of hypertension, TC, diabetes |
| Capital Iron and Steel Company Hospital Cohort (CISCH)            | China         | 1992                 | 3.3                                    | 1970                                                  | 51                      | 34-64                                                 | IHD (14), stroke (9)              | Unknown            | Most APCSC cohorts used death registries, medical records or self-report <sup>5</sup> | Age, sex, smoking status                                                                                                                                                                          | All combinations of SBP, diabetes              |
| CardioVascular Disease risk FACtors Two-township Study (CVDFACTS) | Taiwan        | 1991-1993            | End of 2002                            | 2917 (CHD analysis), 3453 (ischaemic stroke analysis) | 57                      | ≥ 30 (CHD analysis), ≥ 20 (ischaemic stroke analysis) | CHD (203), ischaemic stroke (132) | Adjudicated        | Medical records, death registries                                                     | Age, age square, sex, smoking status, alcohol intake, education level, physical activity, family history of stroke, residential area                                                              | All combinations of SBP, TC, FPG               |
| Cardiovascular Health Study (CHS)                                 | United States | 1989-1990, 1992-1993 | End of 2002                            | 4805                                                  | 61                      | ≥65                                                   | CHD (1498), stroke (686)          | Adjudicated        | Medical records                                                                       | Age, sex, smoking status, alcohol intake, education, race                                                                                                                                         | All combinations of SBP, TC, PPG               |
| China Prospective Study (CPS)                                     | China         | 1991-1992            | End of 2005                            | 209918                                                | 0                       | 40-79                                                 | CHD (1953), stroke (6379)         | Not adjudicated    | Death registries                                                                      | Age, smoking status, alcohol intake, education level, area                                                                                                                                        | SBP                                            |
| Chinese Multi-Provincial Cohort Study (CMCS)                      | China         | 1992                 | 11                                     | 30378                                                 | 47                      | 35-64                                                 | CHD (227), stroke (582)           | Adjudicated        | Medical records, death certificates                                                   | Age, sex, smoking status                                                                                                                                                                          | All combinations of SBP, TC, FPG               |

| Cohort name                                                                                              | Country                                     | Baseline study date             | Mean duration or end year of follow-up | No. of participants | Proportion of female(%) | Age range at baseline | Number of event (n) <sup>1</sup>   | Event adjudication                                          | Source of event <sup>4</sup>                                                          | Confounders adjusted <sup>2</sup>                                                                                 | Mediators adjusted <sup>3</sup>       |
|----------------------------------------------------------------------------------------------------------|---------------------------------------------|---------------------------------|----------------------------------------|---------------------|-------------------------|-----------------------|------------------------------------|-------------------------------------------------------------|---------------------------------------------------------------------------------------|-------------------------------------------------------------------------------------------------------------------|---------------------------------------|
| Cohort of Norway (CONOR) (except Tromsø and HUNT studies)                                                | Norway                                      | 1997-2003                       | 2009                                   | 66530               | 49                      | 40- 77                | CHD (771), stroke (422)            | Not adjudicated                                             | Death registries                                                                      | Age, sex, smoking status                                                                                          | All combinations of SBP, TC, PPG      |
| Cohort study from Porto Alegre, southern Brazil                                                          | Brazil                                      | 1995-1996                       | 6                                      | 1091                | 55                      | 18-88                 | CHD (11), stroke (19)              | Adjudicated                                                 | Self-report, next of kin, medical records, and death certificates                     | Age, sex, smoking status, alcohol intake, race, SES†                                                              | All combinations of SBP, diabetes     |
| Corfu and Crete Cohort, Seven Countries Study                                                            | Greece                                      | 1960-1961                       | 25                                     | 1160                | 0                       | 39-59                 | CHD (41), stroke (79)              | Adjudicated                                                 | Death certificates, death registries, medical records                                 | Age, sex, smoking status, physical activity, SES                                                                  | All combinations of SBP, TC           |
| Crevalcore, Montegiorgio and Rome Cohort, Seven Countries Study                                          | Italy                                       | 1960-1962                       | 25                                     | 2379                | 0                       | 39-59                 | CHD (206), stroke (129)            | Adjudicated                                                 | Medical records, death certificates                                                   | Age, sex, smoking status, physical activity, SES                                                                  | All combinations of SBP, TC           |
| Dalmatia and Slavonia Cohort, Seven Countries Study                                                      | Croatia                                     | 1958                            | 25                                     | 1309                | 0                       | 39-59                 | CHD (94), stroke (136)             | Adjudicated                                                 | Medical records, death certificates, next of kin                                      | Age, sex, smoking status, physical activity, SES                                                                  | All combinations of SBP, TC           |
| Danish Diet, Cancer and Health study                                                                     | Denmark                                     | 1993-1997                       | End of 2004                            | 57053               | 53                      | 50-64                 | ACS (1127)                         | Adjudicated                                                 | Medical records, death registries                                                     | Age, sex, smoking status                                                                                          | All combinations of SBP, TC, diabetes |
| Diabetes Cardiovascular Risk-Evaluation: Targets and Essential Data for Commitment of Treatment (DETECT) | Germany                                     | 2003                            | End of 2008                            | 7519                | 59                      | 18-95                 | CHD (93), stroke (69)              | Not adjudicated                                             | Medical records, death certificates                                                   | Age, sex, smoking status                                                                                          | All combinations of SBP, TC, FPG      |
| Diabetes Intervention Study                                                                              | Germany                                     | 1977                            | 11                                     | 1139                | 44                      | 28-56                 | MI (112) , stroke (23)             | Adjudicated                                                 | Medical records, death certificates, autopsy reports                                  | Age, sex, smoking status                                                                                          | All combinations of SBP, TC, FPG      |
| Dubbo Study of the Elderly                                                                               | Australia                                   | 1988-1989                       | 16                                     | 2805                | 58                      | 60-98                 | CHD (645) , ischaemic stroke (272) | Adjudicated                                                 | Medical records, death certificates                                                   | Age, sex, smoking status                                                                                          | All combinations of SBP, TC, FPG      |
| East and West Finland Cohort, Seven Countries Study, Phase I                                             | Finland                                     | 1959                            | 25                                     | 1561                | 0                       | 39-59                 | CHD (329), stroke (74)             | Not adjudicated                                             | Medical records, death registries                                                     | Age, sex, smoking status, physical activity, SES                                                                  | All combinations of SBP, TC           |
| East and West Finland Cohort, Seven Countries Study, Phase II                                            | Finland                                     | 1990                            | 10                                     | 469                 | 0                       | 69-89                 | CHD (55), stroke (18)              | Not adjudicated                                             | Medical records, death registries                                                     | Age, sex, smoking status, physical activity, SES                                                                  | All combinations of SBP, TC, FPG      |
| Electrical Generating Authority of Thailand Study (EGAT)                                                 | Thailand                                    | 1985                            | 11.4                                   | 2951                | 22                      | 35-54                 | IHD (27), stroke (13)              | Unknown                                                     | Most APCSC cohorts used death registries, medical records or self-report <sup>5</sup> | Age, sex, smoking status                                                                                          | All combinations of SBP, TC, FPG      |
| EURODIAB Prospective Complications Study                                                                 | 16 European countries                       | 1989-1991                       | 7                                      | 3250                | 48                      | 18-60                 | CHD (147)                          | Adjudicated                                                 | Self-report, medical records, death certificates                                      | Age, sex, smoking status                                                                                          | All combinations of SBP, TC, HbA1c    |
| EUROSTROKE                                                                                               | Finland, the Netherlands and United Kingdom | 1979-1983, 1984-1989, 1990-1993 | NR                                     | 698                 | 0                       | 42-95                 | Stroke (219)                       | Collaborative study with events adjudicated in some cohorts | Self-report, medical records, death certificates and death registries                 | Age, smoking status, alcohol intake, family history of stroke, family history of MI, previous MI, previous stroke | All combinations of SBP, TC, diabetes |
| Fangshan Cohort Study                                                                                    | China                                       | 1991                            | 2.7                                    | 752                 | 68                      | 34-71                 | Stroke (7)                         | Unknown                                                     | Most APCSC cohorts used death registries, medical records or self-report <sup>5</sup> | Age, sex, smoking status                                                                                          | All combinations of SBP, TC, FPG      |
| Finnish Mobile Clinic Health Examination Survey (FMC)                                                    | Finland                                     | 1966-1972                       | End of 1994                            | 29297               | 47                      | 30- 69                | CHD (3118)                         | Adjudicated                                                 | Medical records, death certificates, autopsy reports                                  | Age, sex, smoking status, physical activity                                                                       | All combinations of SBP, TC, PPG      |
| Fletcher Challenge Heart and Health Study                                                                | New Zealand                                 | 1992                            | 5.9                                    | 7442                | 20                      | 20-89                 | IHD (234), stroke (44)             | Not adjudicated                                             | Most APCSC cohorts used death registries, medical records or self-report <sup>5</sup> | Age, sex, smoking status                                                                                          | All combinations of SBP, TC, PPG      |
| Framingham Heart Study-Cohort                                                                            | United States                               | 1948-1951                       | End of 2007                            | 2742                | 51                      | 29-62                 | CHD (1055), stroke (576)           | Adjudicated                                                 | Medical records, autopsy reports, death certificates, next of kin                     | Age, sex, smoking status, education                                                                               | All combinations of SBP, TC, CBG      |
| Framingham Heart Study-Offspring                                                                         | United States                               | 1971                            | End of 2007                            | 4226                | 49                      | 18-62                 | CHD (725), stroke (223)            | Adjudicated                                                 | Medical records, autopsy reports, death certificates, next of kin                     | Age, sex, smoking status, alcohol intake                                                                          | All combinations of SBP, TC, FPG      |
| General Post Office Study (GPO)                                                                          | United Kingdom                              | 1966-1967                       | End of 2007                            | 1136                | 36                      | 35-70                 | CHD (218) , stroke (72)            | Adjudicated                                                 | Death certificates                                                                    | Age, sex, smoking status                                                                                          | All combinations of SBP, TC, PPG      |
| Goteborg BEDA study                                                                                      | Sweden                                      | 1980                            | End of 1999                            | 1408                | 100                     | 38-64                 | CHD (64), stroke (57)              | Not adjudicated                                             | Medical records, death certificates                                                   | Age, smoking status                                                                                               | All combinations of SBP, TC, diabetes |
| Health Risks and Quality of Life in the Hong Kong Elderly                                                | China, Hong Kong                            | 1991-1992                       | 3                                      | 2032                | 51                      | ≥ 70                  | IHD (72) , stroke (50)             | Not adjudicated                                             | Self-report, medical records, death registry                                          | Age, sex, smoking status                                                                                          | All combinations of SBP, diabetes     |

| Cohort name                                                                                  | Country       | Baseline study date | Mean duration or end year of follow-up | No. of participants | Proportion of female(%) | Age range at baseline | Number of event (n) <sup>1</sup> | Event adjudication | Source of event <sup>4</sup>                                                          | Confounders adjusted <sup>2</sup>                               | Mediators adjusted <sup>3</sup>       |
|----------------------------------------------------------------------------------------------|---------------|---------------------|----------------------------------------|---------------------|-------------------------|-----------------------|----------------------------------|--------------------|---------------------------------------------------------------------------------------|-----------------------------------------------------------------|---------------------------------------|
| Hisayama Study                                                                               | Japan         | 1961                | 25.1                                   | 1055                | 54                      | 40-91                 | IHD (64), stroke (207)           | Adjudicated        | Medical records, death certificates, autopsy reports                                  | Age, sex, smoking status                                        | All combinations of SBP, TC           |
| Hisayama Study, phase II                                                                     | Japan         | 1988                | 14                                     | 2632                | 58                      | 40-96                 | CHD (135), stroke (237)          | Adjudicated        | Medical records, death certificates, autopsy reports                                  | Age, sex, smoking status, alcohol intake                        | All combinations of SBP, TC, FPG      |
| Honolulu Heart Program (HHP)                                                                 | United States | 1965-1968           | End of 1994                            | 6722                | 0                       | 45-68                 | CHD (2093), stroke (942)         | Adjudicated        | Medical records, self-report                                                          | Age, smoking status, alcohol intake, education                  | All combinations of SBP, TC, PPG      |
| Huashan Study                                                                                | China         | 1992                | 2.8                                    | 1496                | 53                      | 35-75                 | Stroke (11)                      | Unknown            | Most APCSC cohorts used death registries, medical records or self-report <sup>5</sup> | Age, sex, smoking status                                        | All combinations of SBP, TC, FPG      |
| Jichi Medical School-Ambulatory blood pressure monitoring(JMS-ABPM), wave 1                  | Japan         | 1992                | 3.4                                    | 821                 | 62                      | 50-97                 | Stroke (59)                      | Adjudicated        | Medical records                                                                       | Age, sex, smoking status                                        | All combinations of SBP, TC, FPG      |
| Kaunas Rotterdam Intervention Study (KRIS)                                                   | Lithuania     | 1972-1974           | End of 2010                            | 2447                | 0                       | 45-59                 | CHD (646), stroke (168)          | Adjudicated        | Medical records, death certificates                                                   | Age, smoking status                                             | All combinations of SBP, TC, PPG      |
| Kinmen Neurological Disorders Survey (KINDS)                                                 | Taiwan        | 1993                | 2.9                                    | 895                 | 49                      | 50-91                 | IHD (5)                          | Unknown            | Most APCSC cohorts used death registries, medical records or self-report <sup>5</sup> | Age, sex, smoking status                                        | All combinations of SBP, diabetes     |
| Konan Health and Nutrition Study                                                             | Japan         | 1987                | 6.4                                    | 799                 | 55                      | 20-91                 | Stroke (7)                       | Unknown            | Most APCSC cohorts used death registries, medical records or self-report <sup>5</sup> | Age, sex, smoking status                                        | All combinations of SBP, TC, FPG      |
| Korean Medical Insurance Corporation Study (KMIC)                                            | South Korea   | 1990                | 4                                      | 143312              | 31                      | 35-59                 | IHD (259), stroke (939)          | Unknown            | Most APCSC cohorts used death registries, medical records or self-report <sup>5</sup> | Age, sex, smoking status                                        | All combinations of SBP, TC, FPG      |
| LIFE (Losartan Intervention For Endpoint reduction in hypertension) Study                    | Sweden        | 1995-1997           | 4                                      | 9079                | 54                      | 55-80                 | MI (380), stroke (534)           | Adjudicated        | Medical records, death certificates, autopsy reports                                  | Age, sex, smoking status, race                                  | All combinations of SBP, TC, FPG      |
| ManAgement of Elevated Cholesterol in Primary Prevention Group of Adult Japanese (MEGA)      | Japan         | 1994                | 5.3                                    | 8214                | 68                      | 40-70                 | CHD (142), stroke (97)           | Adjudicated        | Medical records, death certificates                                                   | Age, sex, smoking status                                        | All combinations of SBP, TC, FPG      |
| Melbourne Collaborative Study (MCCS)                                                         | Australia     | 1990-1994           | 13.3                                   | 35975               | 59                      | 27-76                 | CHD (335), stroke (74)           | Adjudicated        | Death registries                                                                      | Age, sex, smoking status, ethnicity                             | All combinations of SBP, TC, FPG      |
| Multi-Ethnic Study of Atherosclerosis (MESA)                                                 | United States | 2000-2002           | End of 2008                            | 6558                | 52                      | 45-84                 | CHD (271), stroke (102)          | Adjudicated        | Medical records                                                                       | Age, sex, smoking status, alcohol intake, education, race       | All combinations of SBP, TC, FPG      |
| Multifactor Primary Prevention Study                                                         | Sweden        | 1970-1973           | End of 1998                            | 7399                | 0                       | 47-55                 | CHD (1698), stroke (837)         | Not adjudicated    | Medical records, death certificates                                                   | Age, smoking status                                             | All combinations of SBP, TC, diabetes |
| Multiple Risk Factor Intervention Trial for the Prevention of Coronary Heart Disease (MRFIT) | United States | 1973-1976           | End of 1985                            | 12508               | 0                       | 35-57                 | CHD (2137), stroke (101)         | Adjudicated        | Medical records, next of kin, death registries, autopsy reports                       | Age, smoking status, alcohol intake, education, race            | All combinations of SBP, TC, FPG      |
| National Heart Foundation Risk Factor Prevalence Study                                       | Australia     | 1989                | 15                                     | 9309                | 51                      | 20-69                 | CHD (140)                        | Not adjudicated    | Death registries                                                                      | Age, sex, smoking status                                        | All combinations of SBP, TC, diabetes |
| Newcastle Study                                                                              | Australia     | 1983-1984           | 5.7                                    | 2939                | 51                      | 21-77                 | IHD (20), stroke (6)             | Unknown            | Most APCSC cohorts used death registries, medical records or self-report <sup>5</sup> | Age, sex, smoking status                                        | All combinations of SBP, TC, diabetes |
| NHANES I Epidemiologic Follow-up Study (NHEFS)                                               | United States | 1971-1975           | End of 1992                            | 9180                | 62                      | 25-74                 | CHD (1394), stroke (671)         | Not adjudicated    | Death registries                                                                      | Age, sex, race, smoking status, alcohol intake, education level | All combinations of SBP, TC, diabetes |
| NIPPON DATA80                                                                                | Japan         | 1980                | 14                                     | 9462                | 56                      | 30-93                 | CHD (86), stroke (226)           | Adjudicated        | Death certificates                                                                    | Age, sex, smoking status, alcohol intake                        | All combinations of SBP, TC, PPG      |
| NIPPON DATA90                                                                                | Japan         | 1990                | 10                                     | 7317                | 58                      | ≥ 30                  | CHD (39), stroke (74)            | Adjudicated        | Death certificates                                                                    | Age, sex, smoking status, alcohol intake                        | All combinations of SBP, TC, FBG      |

| Cohort name                                                  | Country         | Baseline study date        | Mean duration or end year of follow-up | No. of participants | Proportion of female(%) | Age range at baseline | Number of event (n) <sup>1</sup> | Event adjudication                                                                      | Source of event <sup>4</sup>                                                          | Confounders adjusted <sup>2</sup>                                            | Mediators adjusted <sup>3</sup>               |
|--------------------------------------------------------------|-----------------|----------------------------|----------------------------------------|---------------------|-------------------------|-----------------------|----------------------------------|-----------------------------------------------------------------------------------------|---------------------------------------------------------------------------------------|------------------------------------------------------------------------------|-----------------------------------------------|
| Nord-Trondelag Health Study 1 (HUNT 1)                       | Norway          | 1984-1986                  | End of 2007                            | 74286               | 51                      | 19-103                | CHD (4248), stroke (2263)        | Adjudicated for subarachnoid hemorrhage, not adjudicated for CHD and other stroke types | Medical records, autopsy reports, death registries                                    | Age, sex, smoking status                                                     | SBP                                           |
| Nord-Trondelag Health Study 2 (HUNT 2)                       | Norway          | 1995-1997                  | End of 2008                            | 64382               | 53                      | 19-94                 | CHD (1026), stroke (1011)        | Adjudicated for subarachnoid hemorrhage, not adjudicated for CHD and other stroke types | Medical records, autopsy reports, death registries                                    | Age, sex, smoking status                                                     | All combinations of SBP, TC, FPG              |
| Northern Manhattan Study (NOMAS)                             | United States   | 1993-2001                  | 10                                     | 2822                | 64                      | ≥ 40                  | MI (239), stroke (282)           | Adjudicated                                                                             | Self-report, medical records, death certificates                                      | Age, sex, smoking status, race, alcohol intake, physical activity, SES       | All combinations of SBP, TC, PPG              |
| Norwegian Counties Study (NCS)                               | Norway          | 1974-1978                  | End of 2009                            | 57535               | 50                      | 20-50                 | IHD (3397), stroke (1089)        | Not adjudicated                                                                         | Death registries                                                                      | Age, sex, smoking status                                                     | All combinations of SBP, TC, PPG              |
| Ohasama Study                                                | Japan           | 1992                       | 4.1                                    | 1370                | 67                      | 35-89                 | Stroke (24)                      | Unknown                                                                                 | Most APCSC cohorts used death registries, medical records or self-report <sup>5</sup> | Age, sex, smoking status                                                     | All combinations of SBP, TC, PPG              |
| Perth Risk Factors Survey (Perth MONICA)                     | Australia       | 1979-1994                  | 14.4                                   | 8725                | 46                      | 20-90                 | IHD (145), stroke (48)           | Unknown                                                                                 | Most APCSC cohorts used death registries, medical records or self-report <sup>5</sup> | Age, sex, smoking status                                                     | All combinations of SBP, TC, diabetes         |
| Prospective Cardiovascular Munster Study (PROCAM)            | Germany         | 1979-1996                  | 12                                     | 26975               | 32                      | 20-65                 | CHD (544), stroke (196)          | Adjudicated                                                                             | Medical records, death certificates                                                   | Age, sex, smoking status                                                     | All combinations of SBP, TC, FPG              |
| Prospective Study of Women in Gothenburg                     | Sweden          | 1968                       | End of 2008                            | 1462                | 100                     | 38-60                 | CHD (228), stroke (225)          | Adjudicated                                                                             | Medical records, death certificates, self-report                                      | Age, smoking status, alcohol intake, physical activity, education level, SES | All combinations of SBP, TC, FPG              |
| Puerto Rico Heart Health Program (PRHHP)                     | United States   | 1965                       | 8.3                                    | 8462                | 0                       | 45-64                 | CHD (530), stroke (163)          | Adjudicated                                                                             | Medical records, death certificates, next of kin, self-report, autopsy reports        | Age, smoking status, alcohol intake, education, race                         | All combinations of SBP, TC, FPG              |
| Risk of ischaemic heart disease in Zaragoza (ZACARIS)        | Spain           | 1994                       | 5                                      | 6262                | 55                      | 25-99                 | CHD (127)                        | Adjudicated                                                                             | Medical records, death certificates                                                   | Age, sex, smoking status                                                     | All combinations of SBP, TC, FPG              |
| Rotterdam Study (RS)                                         | The Netherlands | 1990                       | 17                                     | 6910                | 59                      | 55-99                 | CHD (1192), stroke (752)         | Adjudicated                                                                             | Medical records, death registries                                                     | Age, sex, smoking status                                                     | All combinations of SBP, TC, PPG              |
| Saitama Cohort Study                                         | Japan           | 1986                       | 11                                     | 2769                | 63                      | 20-94                 | IHD (12), stroke (33)            | Unknown                                                                                 | Most APCSC cohorts used death registries, medical records or self-report <sup>5</sup> | Age, sex, smoking status                                                     | All combinations of SBP, TC                   |
| Seven Cities Cohort Study                                    | China           | 1987                       | 2.7                                    | 4152                | 58                      | 35-90                 | IHD (30), stroke (138)           | Unknown                                                                                 | Most APCSC cohorts used death registries, medical records or self-report <sup>5</sup> | Age, sex, smoking status                                                     | All combinations of SBP, TC, diabetes         |
| Shibata Cohort Study                                         | Japan           | 1977                       | 20                                     | 1728                | 59                      | 40-89                 | IHD (46), stroke (121)           | Unknown                                                                                 | Most APCSC cohorts used death registries, medical records or self-report <sup>5</sup> | Age, sex, smoking status                                                     | All combinations of SBP, TC                   |
| Singapore Cardiovascular Cohort Study                        | Singapore       | 1982-1984, 1992, 1993-1995 | 8.5                                    | 2879                | 0                       | 18-89                 | CHD (125)                        | Not adjudicated                                                                         | Medical records, death registries                                                     | Age, smoking status, race, alcohol intake                                    | All combinations of SBP, HDL cholesterol, FPG |
| Six Chinese Cohorts Study                                    | China           | 1982                       | 8.3                                    | 9099                | 47                      | 35-59                 | IHD (26), stroke (91)            | Unknown                                                                                 | Most APCSC cohorts used death registries, medical records or self-report <sup>5</sup> | Age, sex, smoking status                                                     | All combinations of SBP, TC                   |
| Study of Multifactorial Prevention of Ischemic Heart Disease | Lithuania       | 1977-1980                  | End of 2010                            | 5678                | 0                       | 40-59                 | CHD (1092), stroke (292)         | Adjudicated                                                                             | Medical records, death certificates                                                   | Age, smoking status                                                          | All combinations of SBP, TC, PPG              |

| Cohort name                                                                | Country              | Baseline study date | Mean duration or end year of follow-up | No. of participants | Proportion of female(%) | Age range at baseline | Number of event (n) <sup>1</sup> | Event adjudication | Source of event <sup>4</sup>                                                          | Confounders adjusted <sup>2</sup>                                 | Mediators adjusted <sup>3</sup>                         |
|----------------------------------------------------------------------------|----------------------|---------------------|----------------------------------------|---------------------|-------------------------|-----------------------|----------------------------------|--------------------|---------------------------------------------------------------------------------------|-------------------------------------------------------------------|---------------------------------------------------------|
| Survey in Europe on Nutrition and the Elderly, a Concerted Action (SENECA) | 9 European countries | 1988-1989           | 10                                     | 1279                | 50                      | 70-77                 | CHD (79) , stroke (59)           | Adjudicated        | Death certificates, death registries                                                  | Age, sex, smoking status, alcohol intake, physical activity, diet | All combinations of hypertension, TC, FPG               |
| Tanno - Soubetsu Study                                                     | Japan                | 1977                | 16.4                                   | 1763                | 54                      | 39-65                 | IHD (17), stroke (32)            | Unknown            | Most APCSC cohorts used death registries, medical records or self-report <sup>5</sup> | Age, sex, smoking status                                          | All combinations of SBP, TC, FPG                        |
| Tanushimaru and Ushibuka Cohort, Seven Countries Study                     | Japan                | 1958-1960           | 25                                     | 859                 | 0                       | 39-59                 | CHD (30), stroke (93)            | Adjudicated        | Medical records, death certificates                                                   | age, sex, smoking status, physical activity, SES                  | All combinations of SBP, TC                             |
| Tehran Lipid and Glucose Study (TLGS)                                      | Iran                 | 1999-2001           | 7.6                                    | 5406                | 55                      | 40-80                 | CHD (291), stroke (49)           | Adjudicated        | Medical records, death certificates, autopsy reports                                  | Age, sex, smoking status, SES, family history of CVD              | All combinations of SBP, TC, FPG                        |
| Tianjin Study                                                              | China                | 1984                | 6.1                                    | 7527                | 51                      | 35-95                 | IHD (79), stroke (277)           | Unknown            | Most APCSC cohorts used death registries, medical records or self-report <sup>5</sup> | Age, sex, smoking status                                          | SBP                                                     |
| Tromsø Study (4th cohort)                                                  | Norway               | 1994-1995           | 2010                                   | 27158               | 53                      | 25- 97                | MI (1777), stroke (1277)         | Adjudicated        | Medical records, death certificates, death registries, autopsy reports                | Age, sex, smoking status, physical activity, alcohol, SES         | All combinations of SBP, TC, diabetes                   |
| Turkish Adult Risk Factor Study (TARF)                                     | Turkey               | 1998                | End of 2010                            | 3687                | 51                      | 20-80                 | CHD (460)                        | Not adjudicated    | Medical records                                                                       | Age, sex, smoking status                                          | All combinations of SBP, TC, PPG                        |
| Uppsala Longitudinal Study of Adult Men (ULSAM)                            | Sweden               | 1991-1995           | End of 2008                            | 1221                | 0                       | 70                    | CHD (216) , stroke (156)         | Adjudicated        | Medical records, death registries                                                     | Age, smoking status, physical activity, SES                       | All combinations of SBP, TC, PPG                        |
| US Railroad Cohort, Seven Countries Study                                  | United States        | 1957-1959           | 25                                     | 2216                | 0                       | 39-59                 | CHD (389), stroke (83)           | Adjudicated        | Medical records, death certificates                                                   | Age, sex, smoking status, physical activity, SES                  | All combinations of SBP, TC                             |
| Ventimiglia di Sicilia Heart Study                                         | Italy                | 1989                | 15                                     | 685                 | 55                      | 35-75                 | MI (31), stroke (28)             | Adjudicated        | Medical records, death certificates                                                   | Age, sex, smoking status                                          | All combinations of SBP, TC, FPG                        |
| Vorarlberg Health Monitoring & Promotion Programme (VHM&PP)                | Austria              | 1985-2005           | 14.4                                   | 185316              | 54                      | 18-96                 | CHD (4953), stroke (2275)        | Not adjudicated    | Death certificates                                                                    | Age, sex, smoking status                                          | All combinations of SBP, TC, FPG                        |
| Western Collaborative Group Study (WCGS)                                   | United States        | 1960                | 33                                     | 3152                | 0                       | 39-59                 | CHD (1153) , stroke (354)        | Adjudicated        | Self-report, medical records and death registries                                     | Age, smoking status, race, physical activity,SES                  | All combinations of SBP, TC, PPG                        |
| Whitehall I Study                                                          | United Kingdom       | 1967-1970           | End of 2010                            | 14283               | 0                       | 40-69                 | CHD (3080) , stroke (1072)       | Not adjudicated    | Death certificates                                                                    | Age, smoking status, employment grade                             | All combinations of SBP, TC, PPG                        |
| Whitehall II Study                                                         | United Kingdom       | 1991-1993           | End of 2010                            | 6687                | 30                      | 39-63                 | CHD (71) , stroke (26)           | Adjudicated        | Self-report, medical records, death certificates                                      | Age, sex, smoking status, employment grade                        | All combinations of SBP, TC, FPG                        |
| Women's Health Initiative Study (WHI-OS)                                   | United States        | 1993-1998           | End of 2005                            | 69351               | 100                     | 50-79                 | CHD (2604), stroke (1231)        | Adjudicated        | Medical records, next of kin, death registries, autopsy reports                       | Age, smoking status, alcohol intake, education, race              | All combinations of SBP, hypercholesterolemia, diabetes |
| Women's Health Initiative: Clinical Trials (WHI-CT)                        | United States        | 1993                | 7                                      | 3836                | 100                     | 50-79                 | CHD (197), stroke (71)           | Adjudicated        | Medical records, next of kin, death registries, autopsy reports                       | Age, smoking status, alcohol intake, education, race, treatment   | All combinations of SBP, TC, FPG                        |
| Yunnan Tin Miner Cohort Study                                              | China                | 1992                | 4.5                                    | 1919                | 5                       | 39-81                 | Stroke (20)                      | Unknown            | Most APCSC cohorts used death registries, medical records or self-report <sup>5</sup> | Age, sex, smoking status                                          | All combinations of SBP, TC                             |
| Zrenjanin, Belgrade and Velika Krsna Cohort, Seven Countries Study         | Serbia               | 1962-1964           | 25                                     | 1492                | 0                       | 39-59                 | CHD (125), stroke (123)          | Adjudicated        | Medical records, death registries, next of kin                                        | Age, sex, smoking status, physical activity, SES                  | All combinations of SBP, TC                             |
| Zutphen cohort, Seven Countries Study, Phase I                             | The Netherlands      | 1960                | 25                                     | 809                 | 0                       | 39-59                 | CHD (141), stroke (31)           | Adjudicated        | Medical records, death certificates                                                   | Age, sex, smoking status, physical activity, SES                  | All combinations of SBP, TC                             |
| Zutphen cohort, Seven Countries Study, Phase II                            | The Netherlands      | 1990                | 10                                     | 556                 | 0                       | 69-89                 | CHD (39), stroke (26)            | Adjudicated        | Medical records, death certificates                                                   | Age, sex, smoking status, physical activity, SES                  | All combinations of SBP, TC, FPG                        |

1. SES may be measured by various indicators such as income, education, etc.
2. Abbreviations: ACS, acute coronary syndrome; CHD, coronary heart disease; IHD, ischaemic heart disease; MI, myocardial infarction.
3. Abbreviations: SBP, systolic blood pressure; TC, total cholesterol; HDL, HDL cholesterol; FPG, fasting plasma glucose; PPG, post-prandial plasma glucose; FBG: fasting blood glucose; CBG, casual blood glucose; HbA1c, Hemoglobin A1c .
4. Medical records included hospital records, physical examinations, cardiac enzymes or electrocardiography (ECG).
5. Woodward M, Barzi F, Martiniuk A, Fang X, Gu DF, Imai Y, et al. Cohort profile: the Asia Pacific Cohort Studies Collaboration. *Int J Epidemiol.* 2006; 35(6): 1412-6.
6. In categorical BMI analysis, age, sex, smoking status, race, alcohol intake, physical activity and income were adjusted as confounders in the ARIC Study.

**Webtable 3:** Stratified analyses of hazard ratios (HRs) for overweight and obesity vs. normal weight. All HRs were also adjusted for confounders as described in Methods and Webtable 2.



| Category                                                       | Overweight       |                  | Obesity          |                  |
|----------------------------------------------------------------|------------------|------------------|------------------|------------------|
|                                                                | CHD              | Stroke           | CHD              | Stroke           |
| <b>Cohort location</b>                                         |                  |                  |                  |                  |
| North America, Western<br>Europe, Australia and<br>New Zealand | 1.25 (1.21-1.29) | 1.09 (1.04-1.14) | 1.63 (1.52-1.75) | 1.36 (1.25-1.47) |
| East and Southeast Asia                                        | 1.38 (1.26-1.52) | 1.27 (1.19-1.36) | 2.26 (1.69-3.02) | 2.02 (1.68-2.44) |
| <b>Baseline year</b>                                           |                  |                  |                  |                  |
| < 1990                                                         | 1.23 (1.18-1.28) | 1.14 (1.08-1.20) | 1.69 (1.55-1.84) | 1.61 (1.45-1.79) |
| ≥ 1990                                                         | 1.29 (1.23-1.36) | 1.11 (1.03-1.19) | 1.69 (1.52-1.88) | 1.35 (1.20-1.52) |

**Webfigure 1:** Flow diagram for articles identified and retained in Medline and Embase

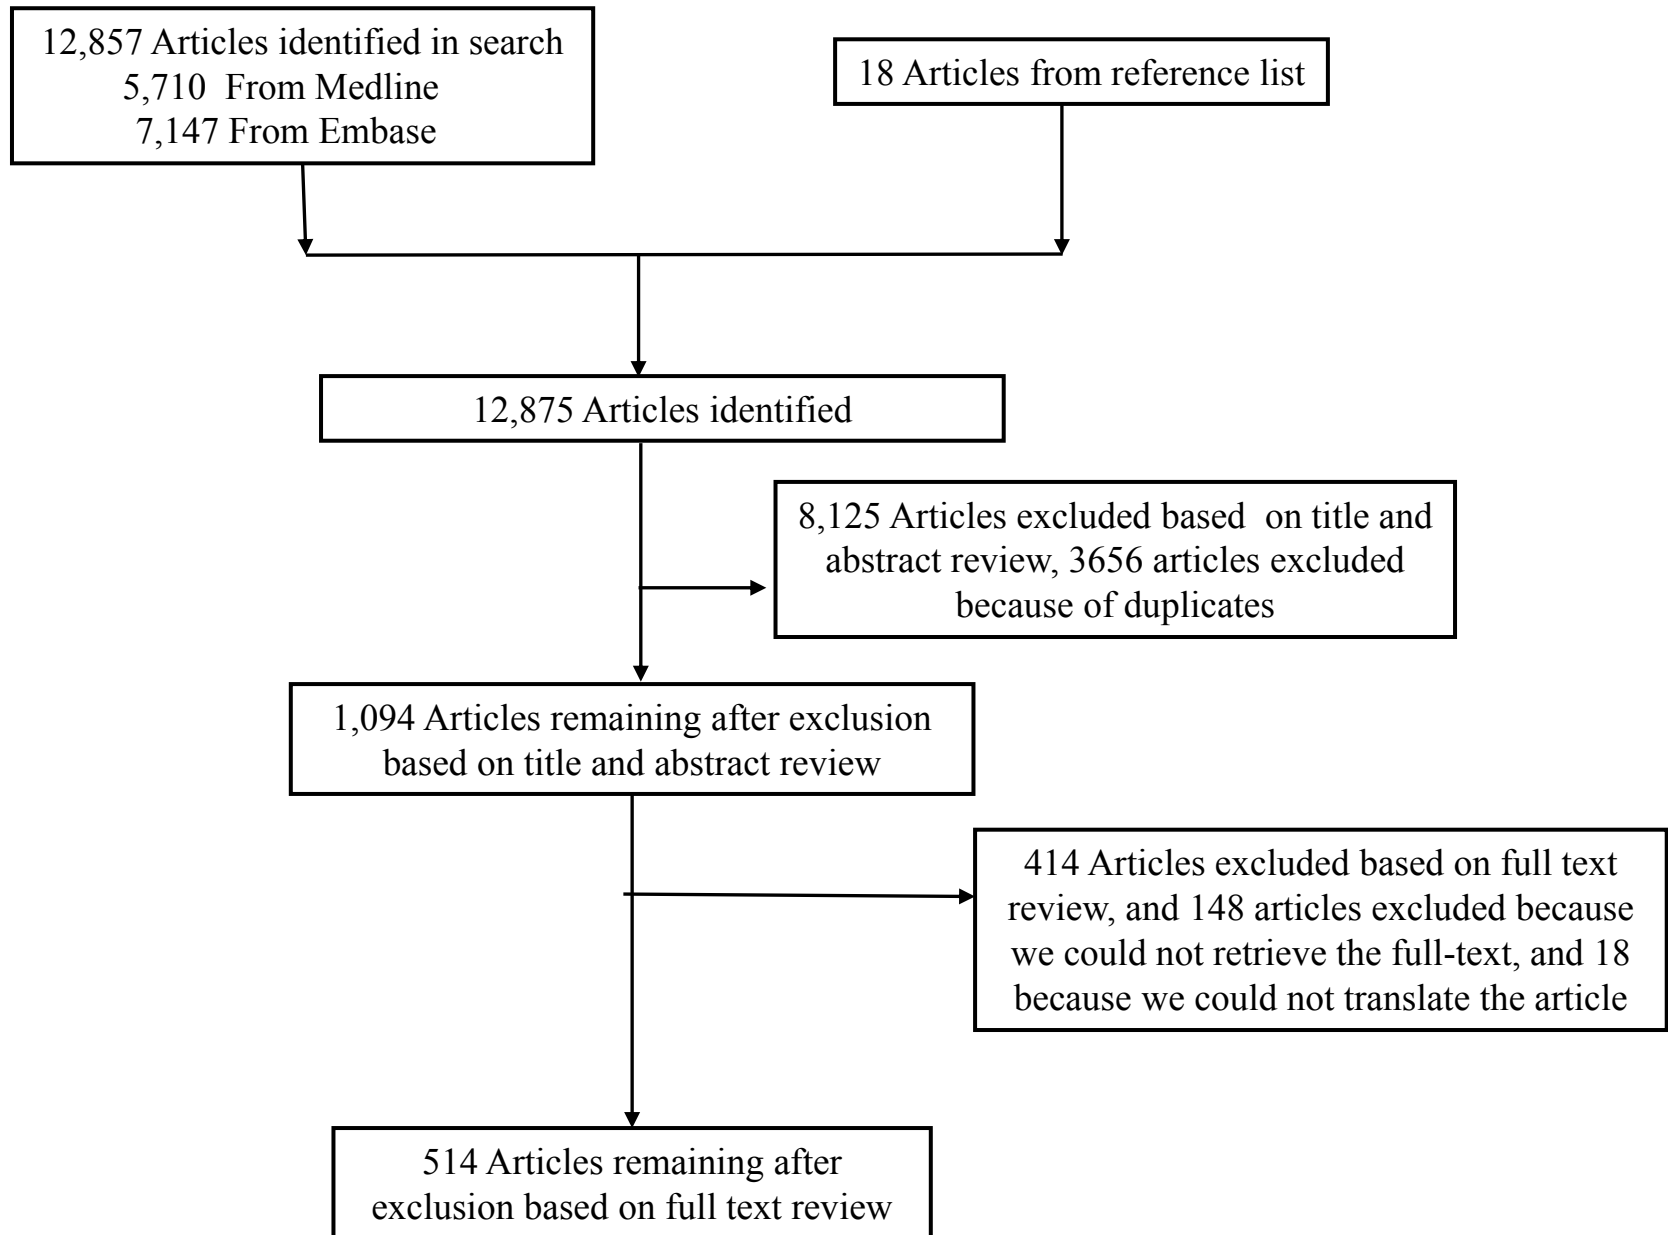

**Webfigure 2:** Cohort-specific hazard ratios (HRs) of CHD per 5 kg/m<sup>2</sup> higher BMI

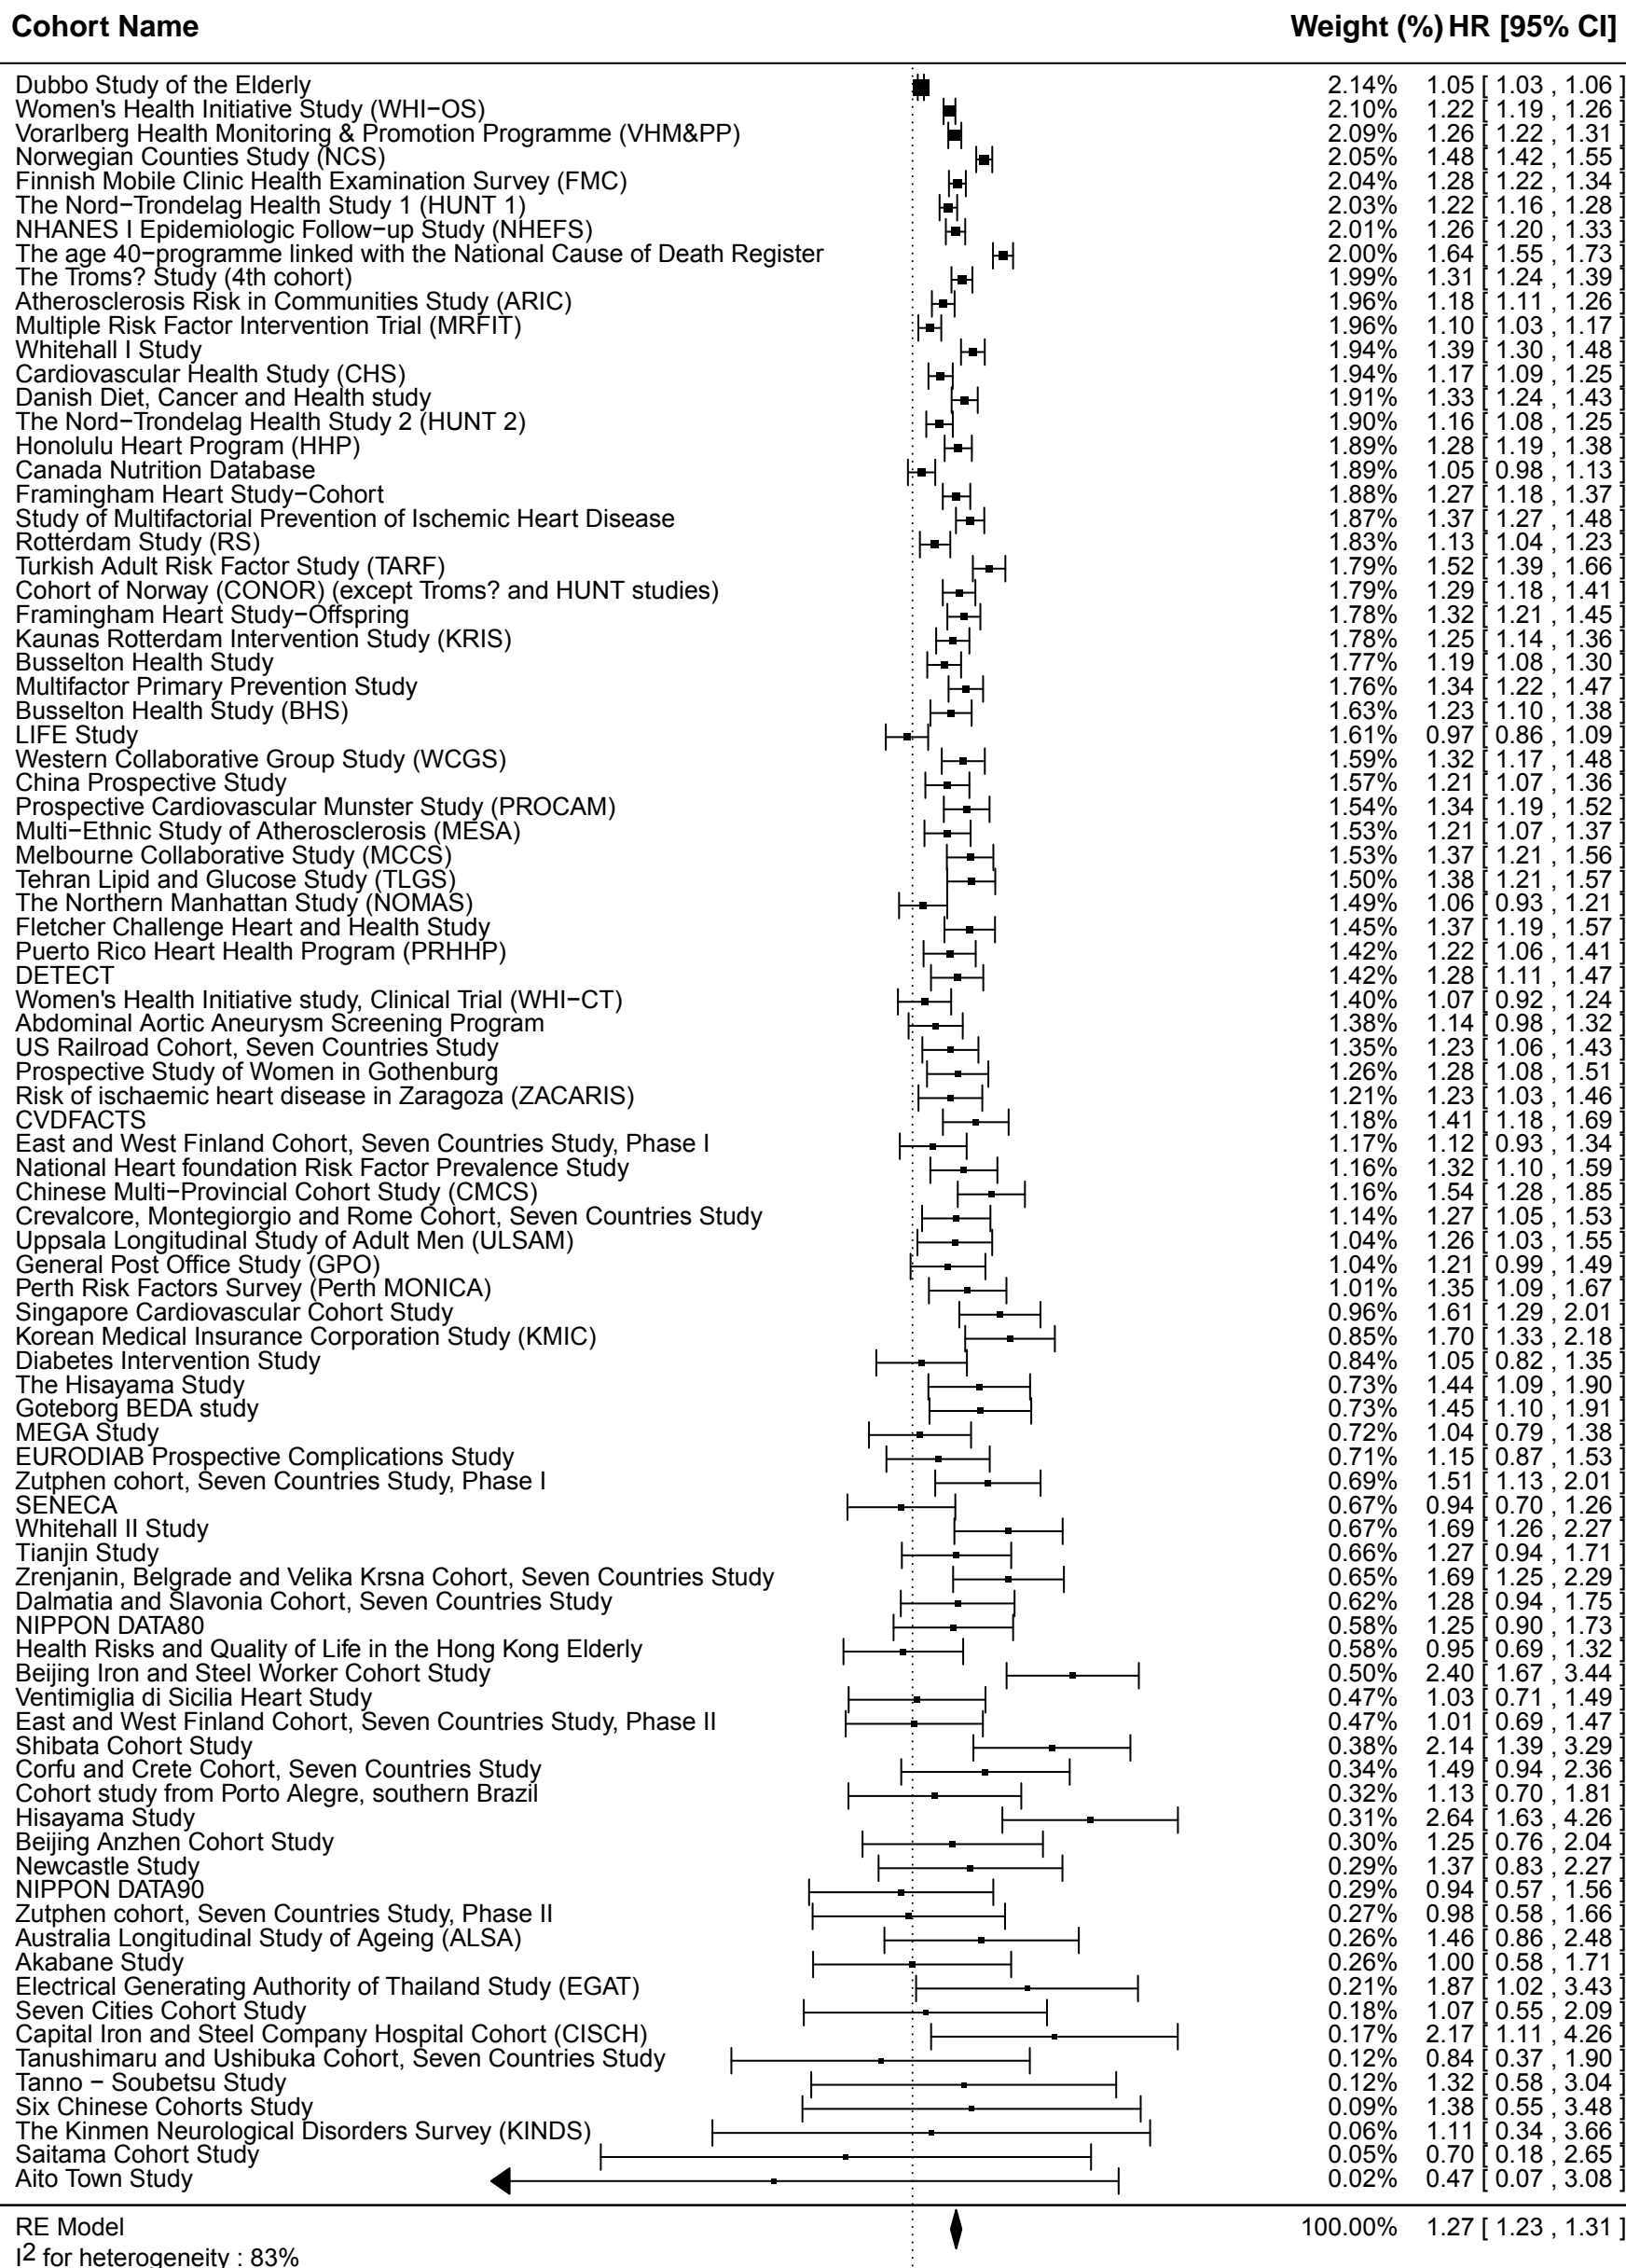

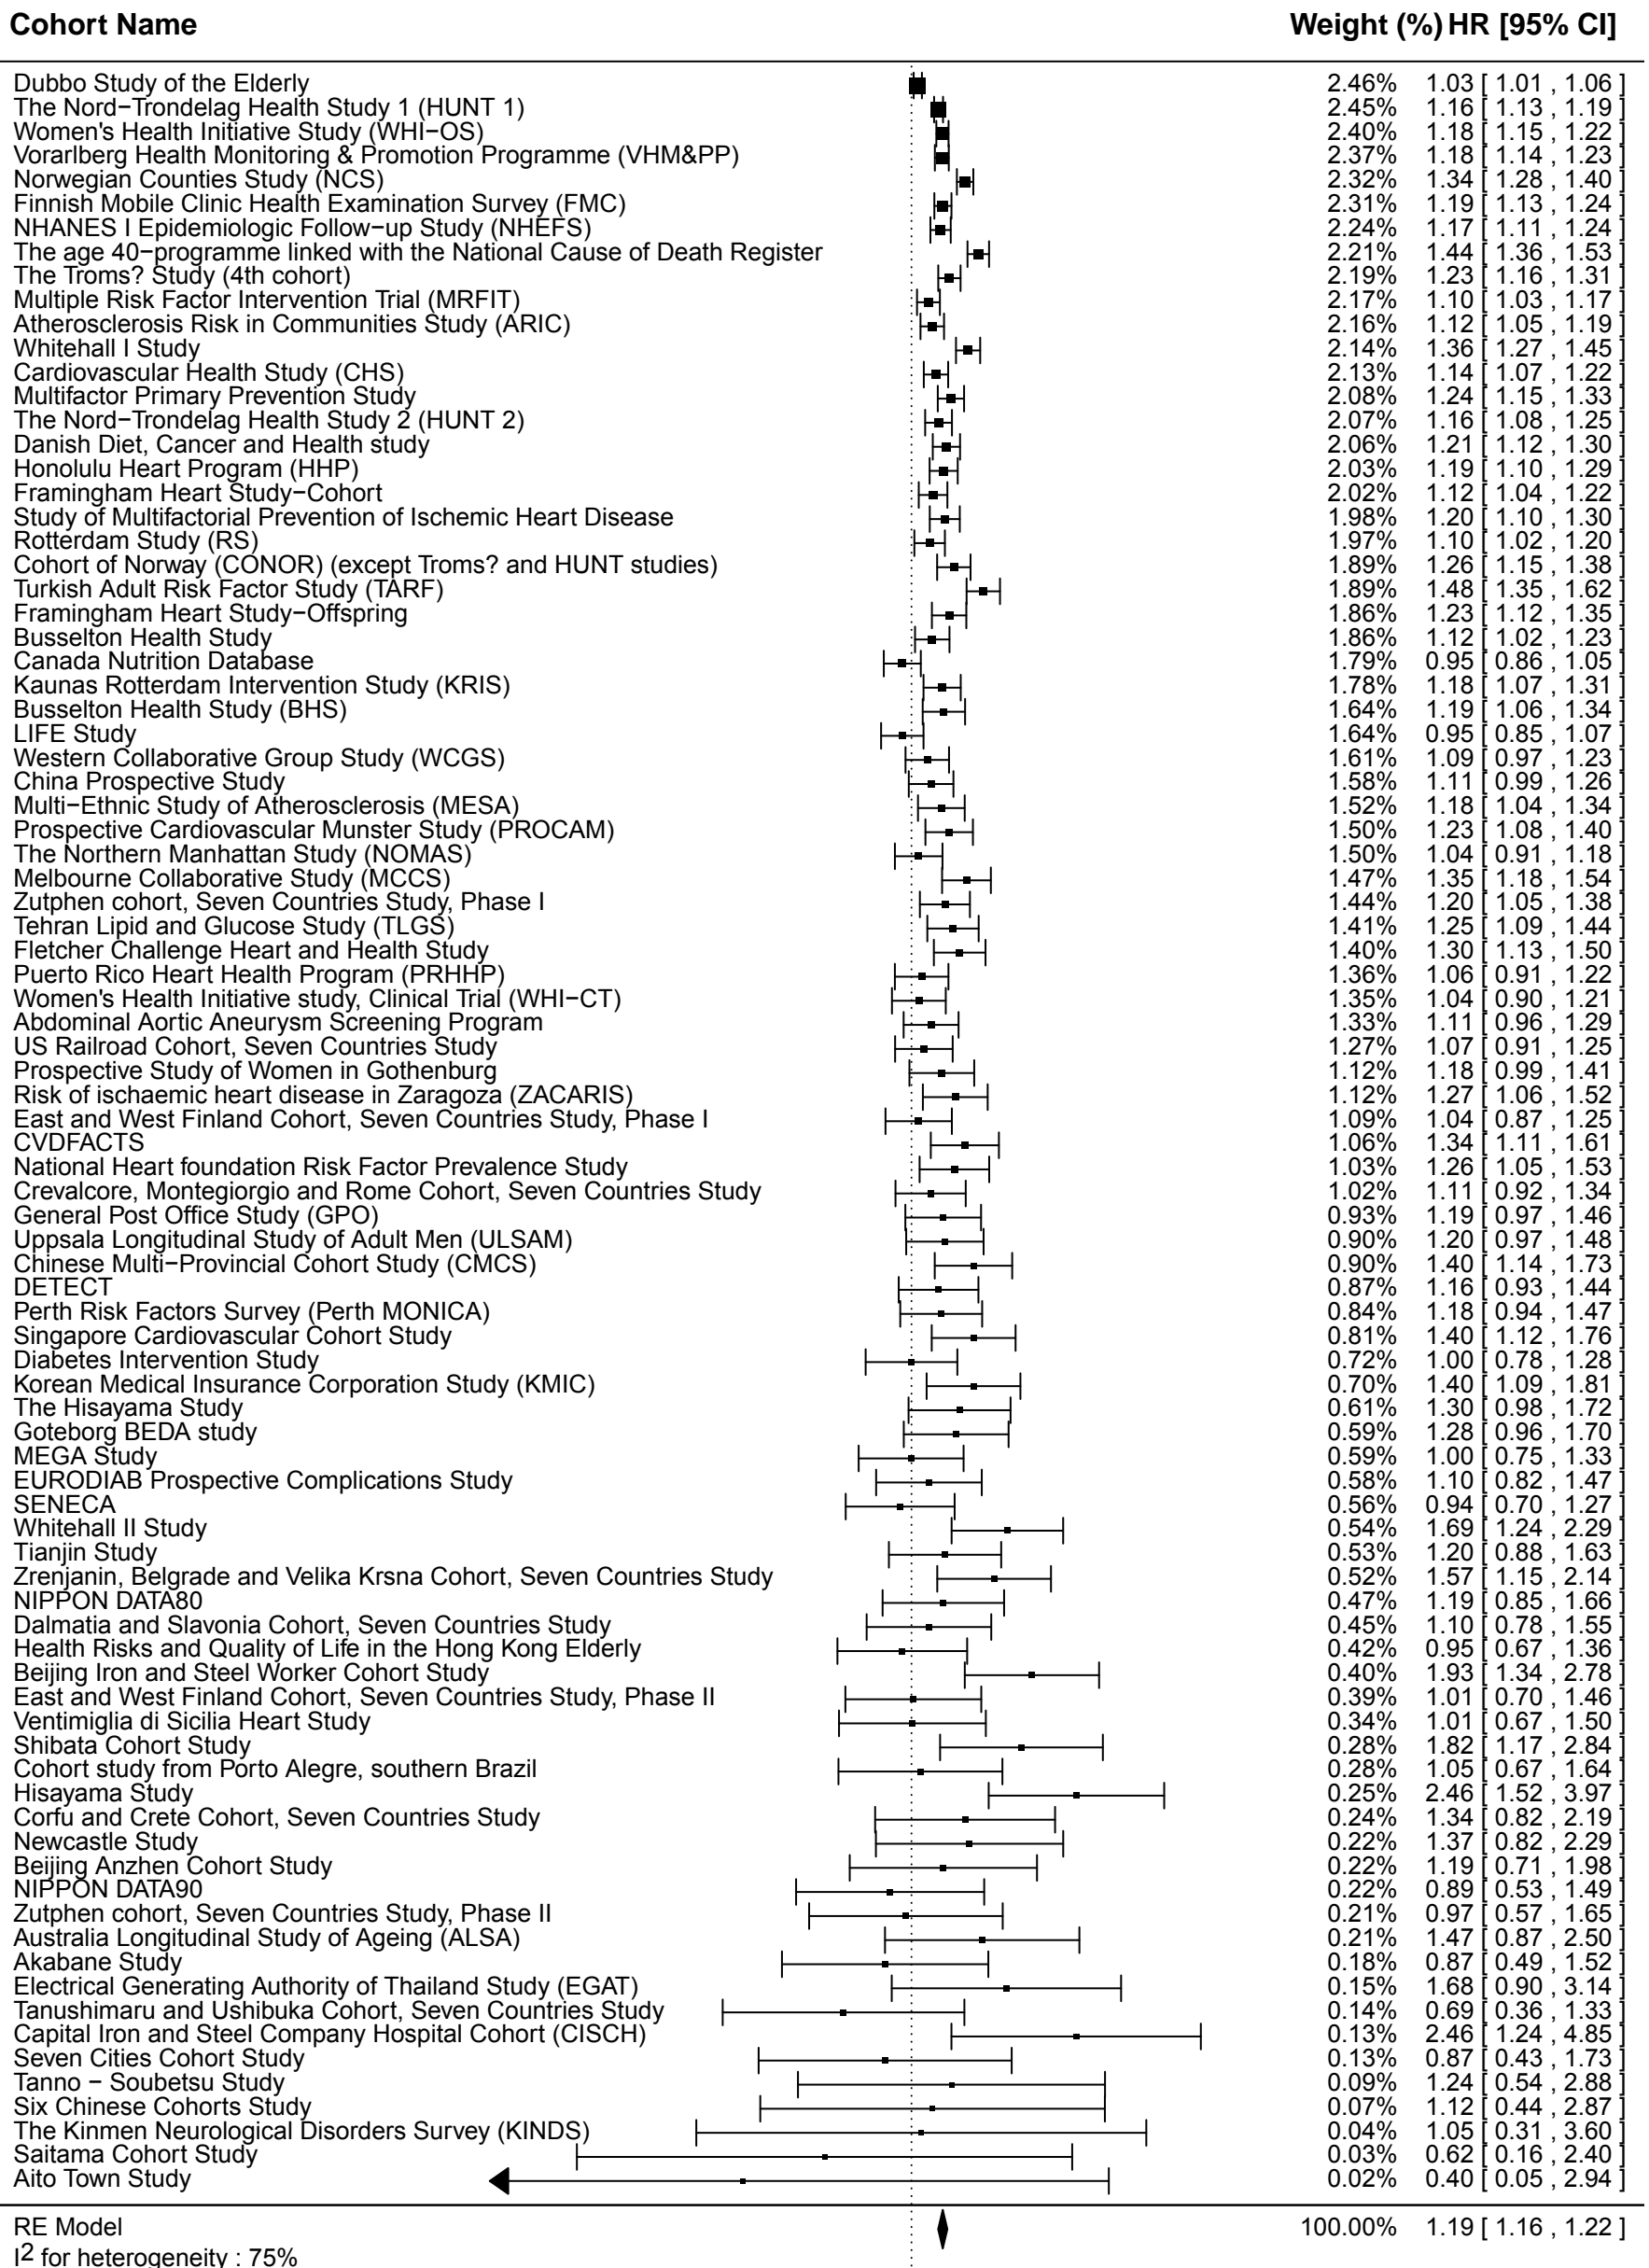

Cohort Name

Weight (%) HR [95% CI]

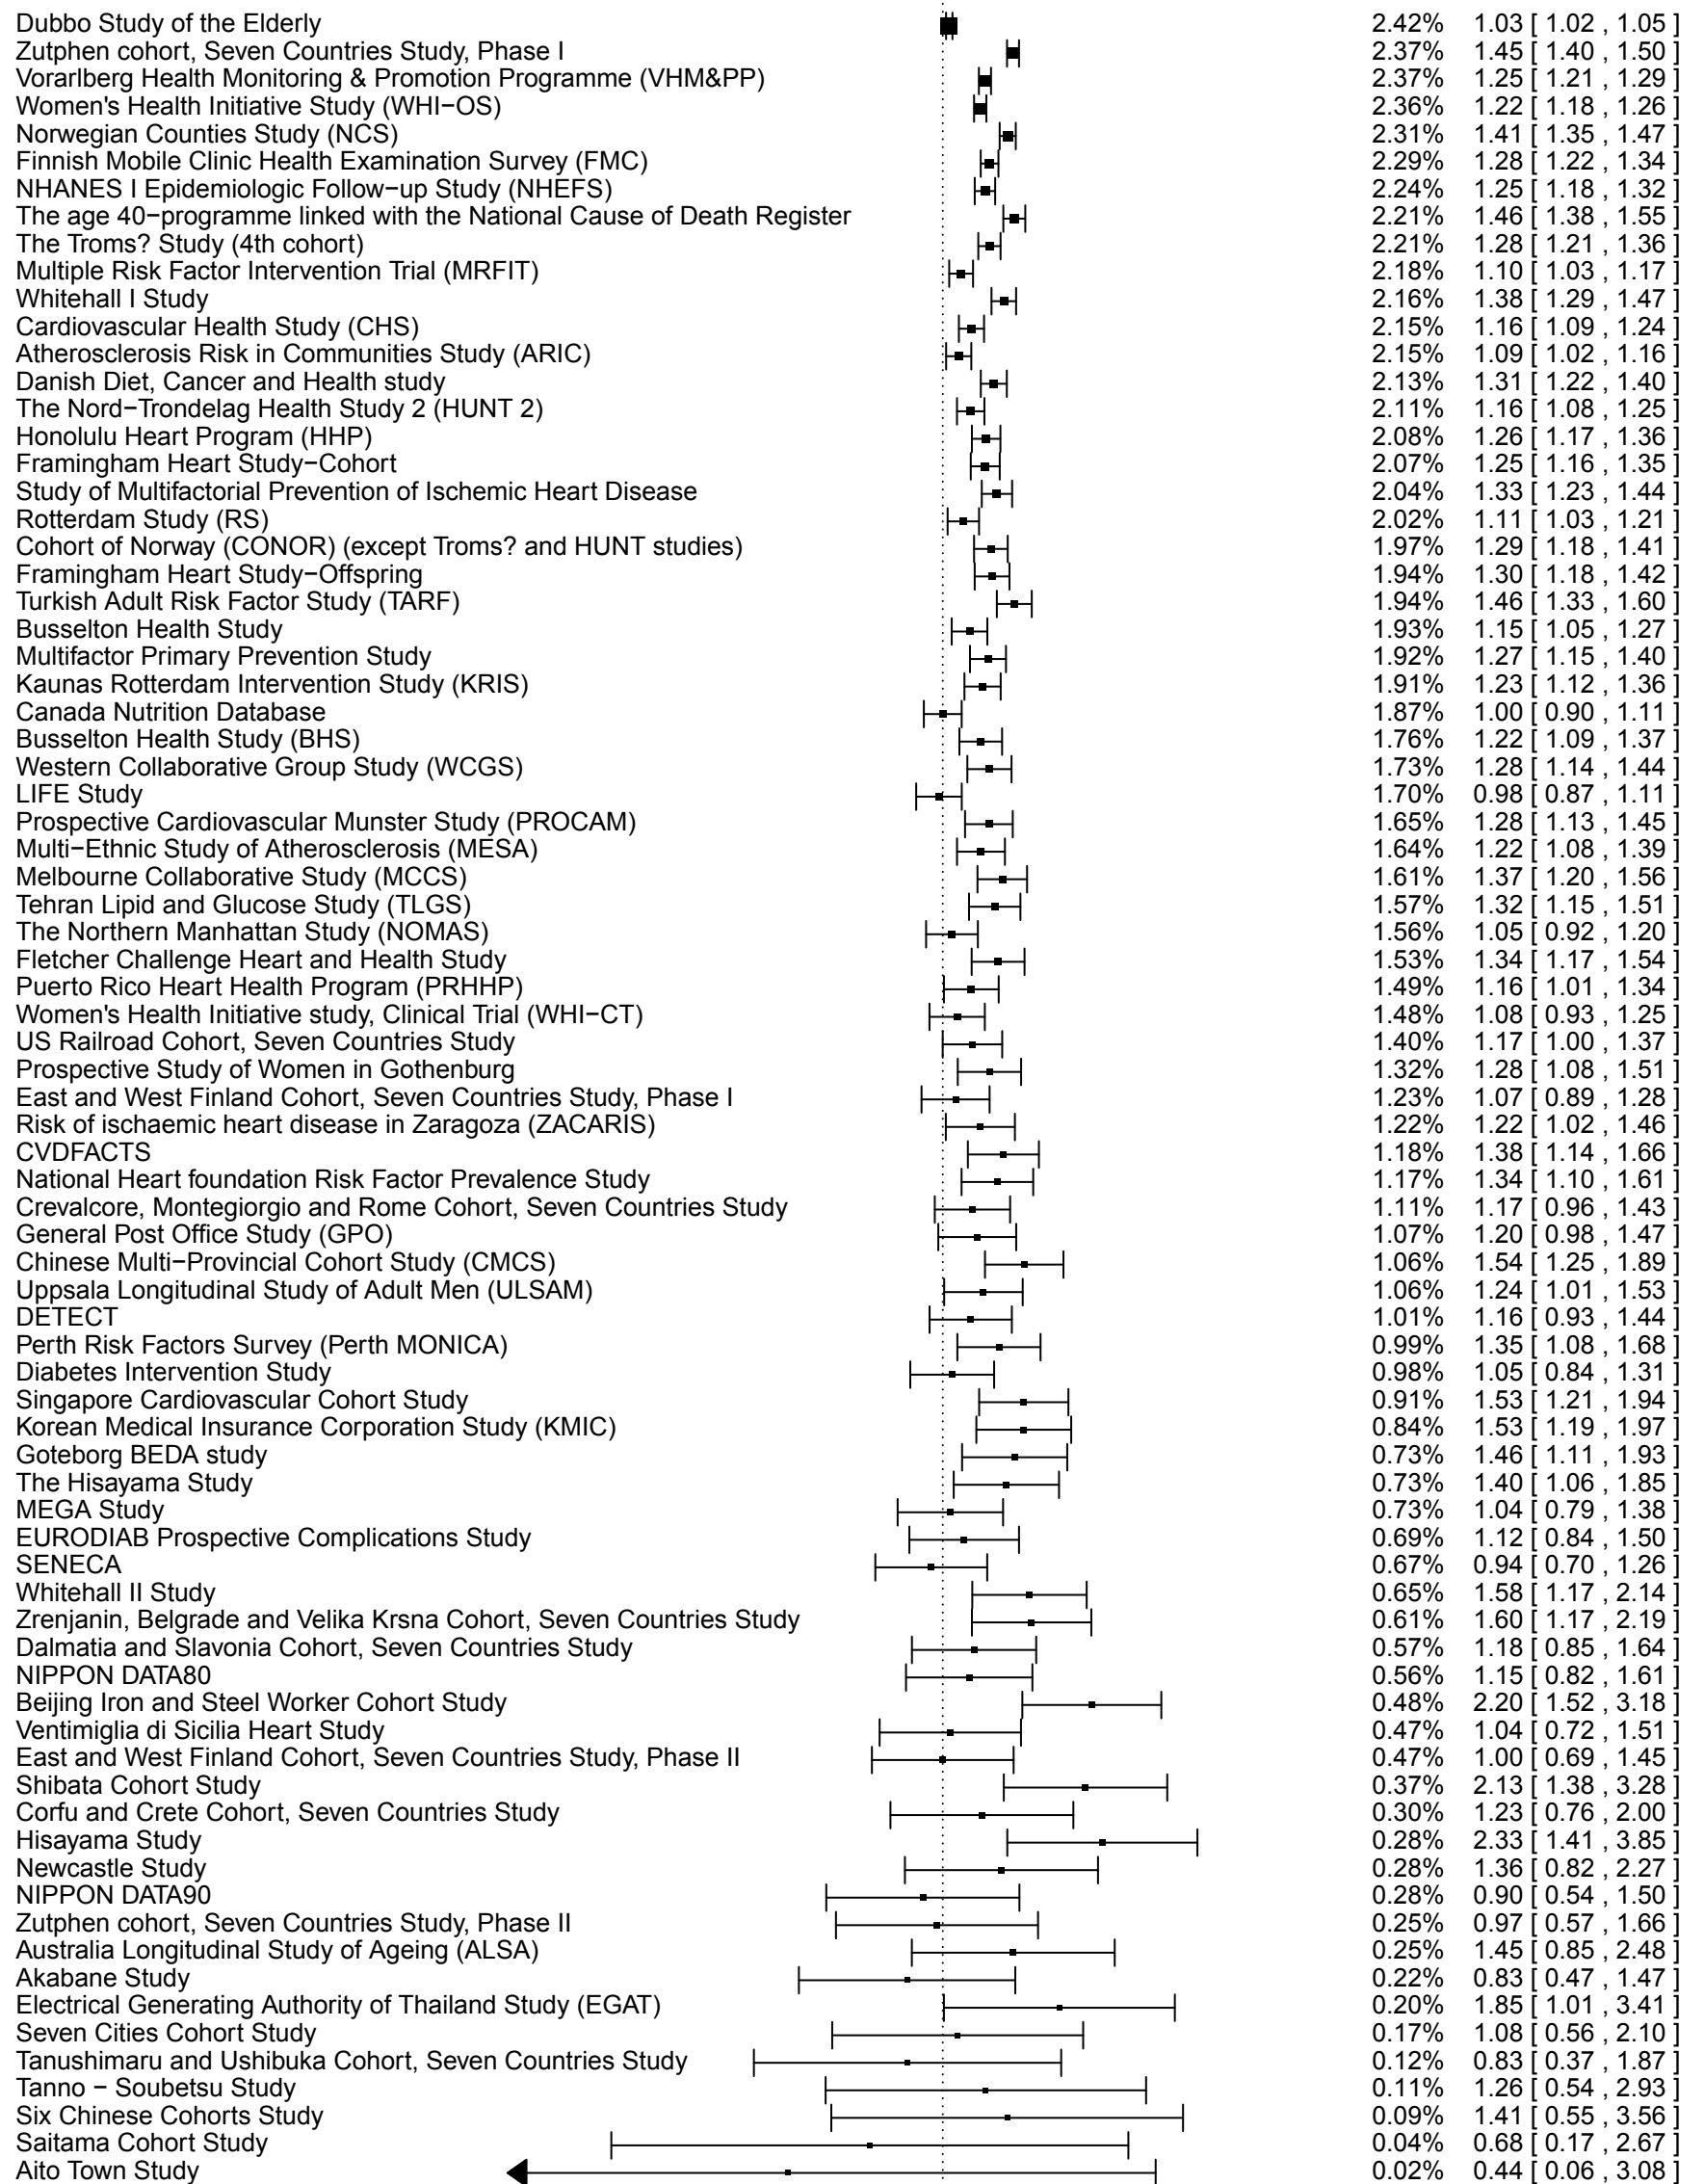

RE Model 100.00% 1.24 [ 1.21 , 1.28 ]  
 I<sup>2</sup> for heterogeneity : 82%

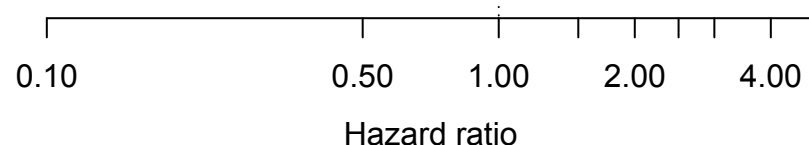

Cohort Name

Weight (%) HR [95% CI]

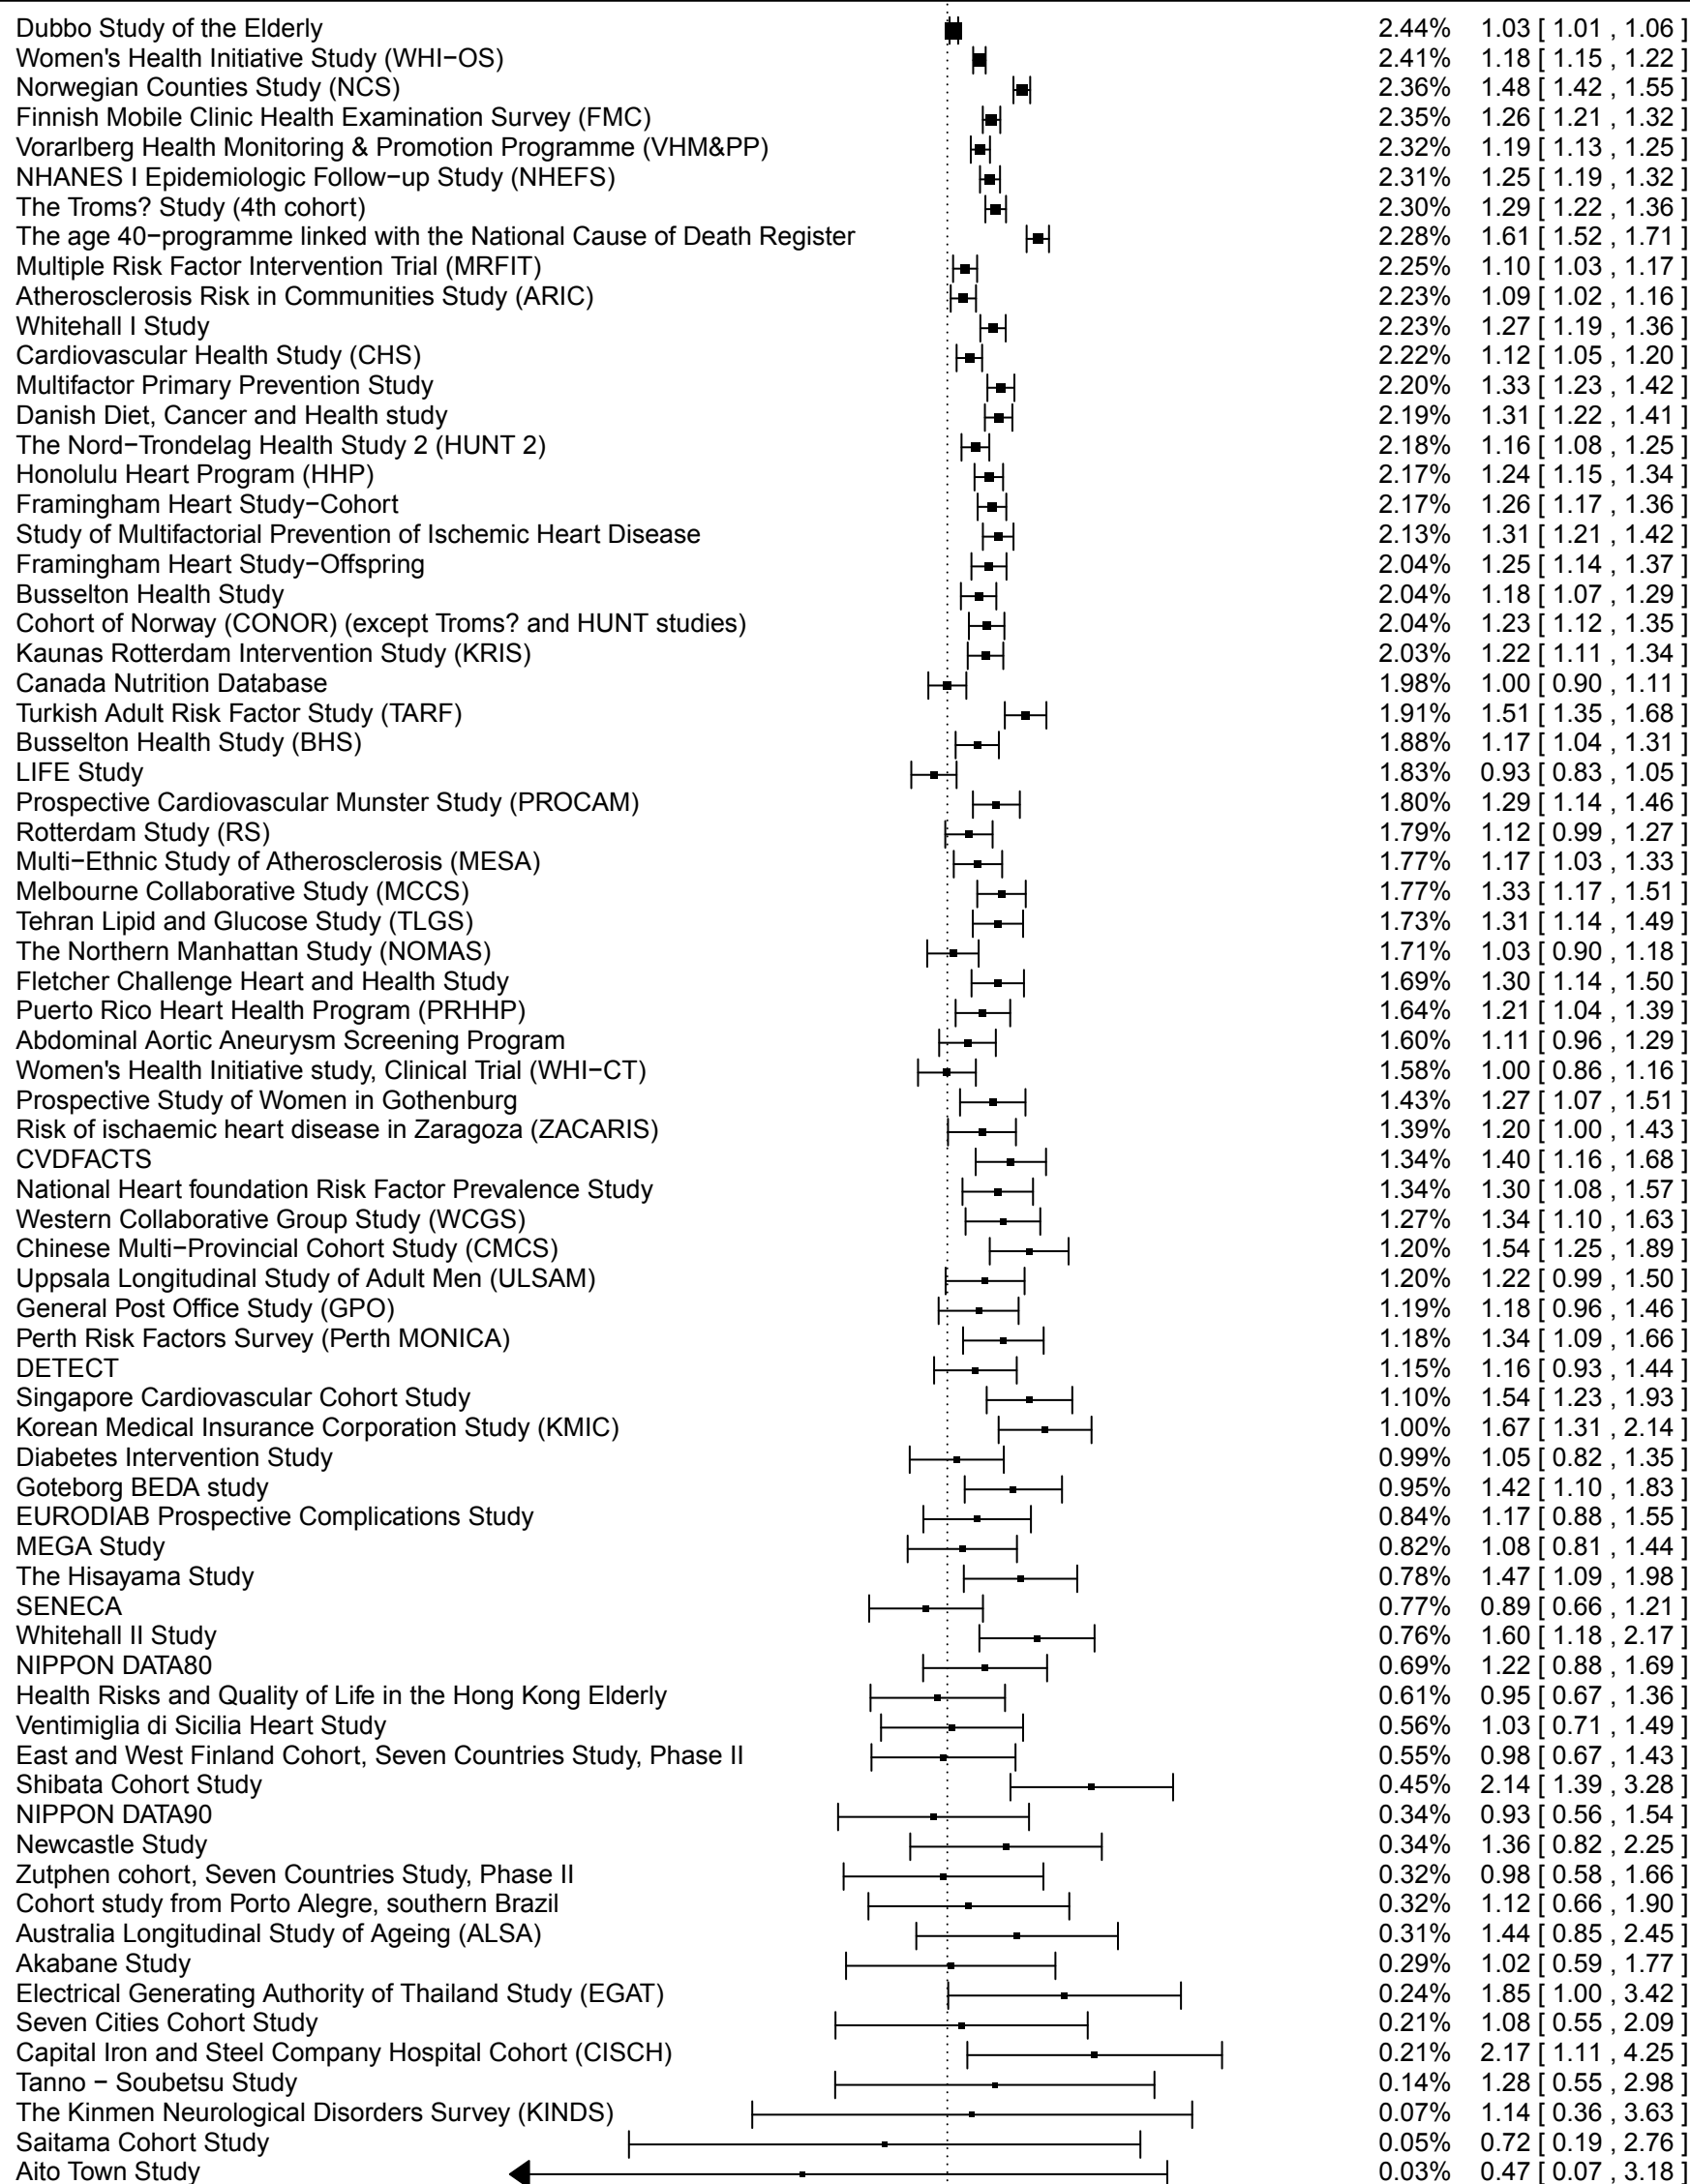

RE Model 100.00% 1.23 [ 1.19 , 1.27 ]

I<sup>2</sup> for heterogeneity : 83%

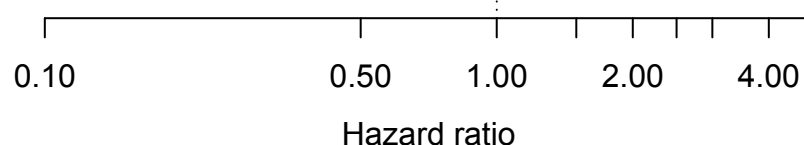



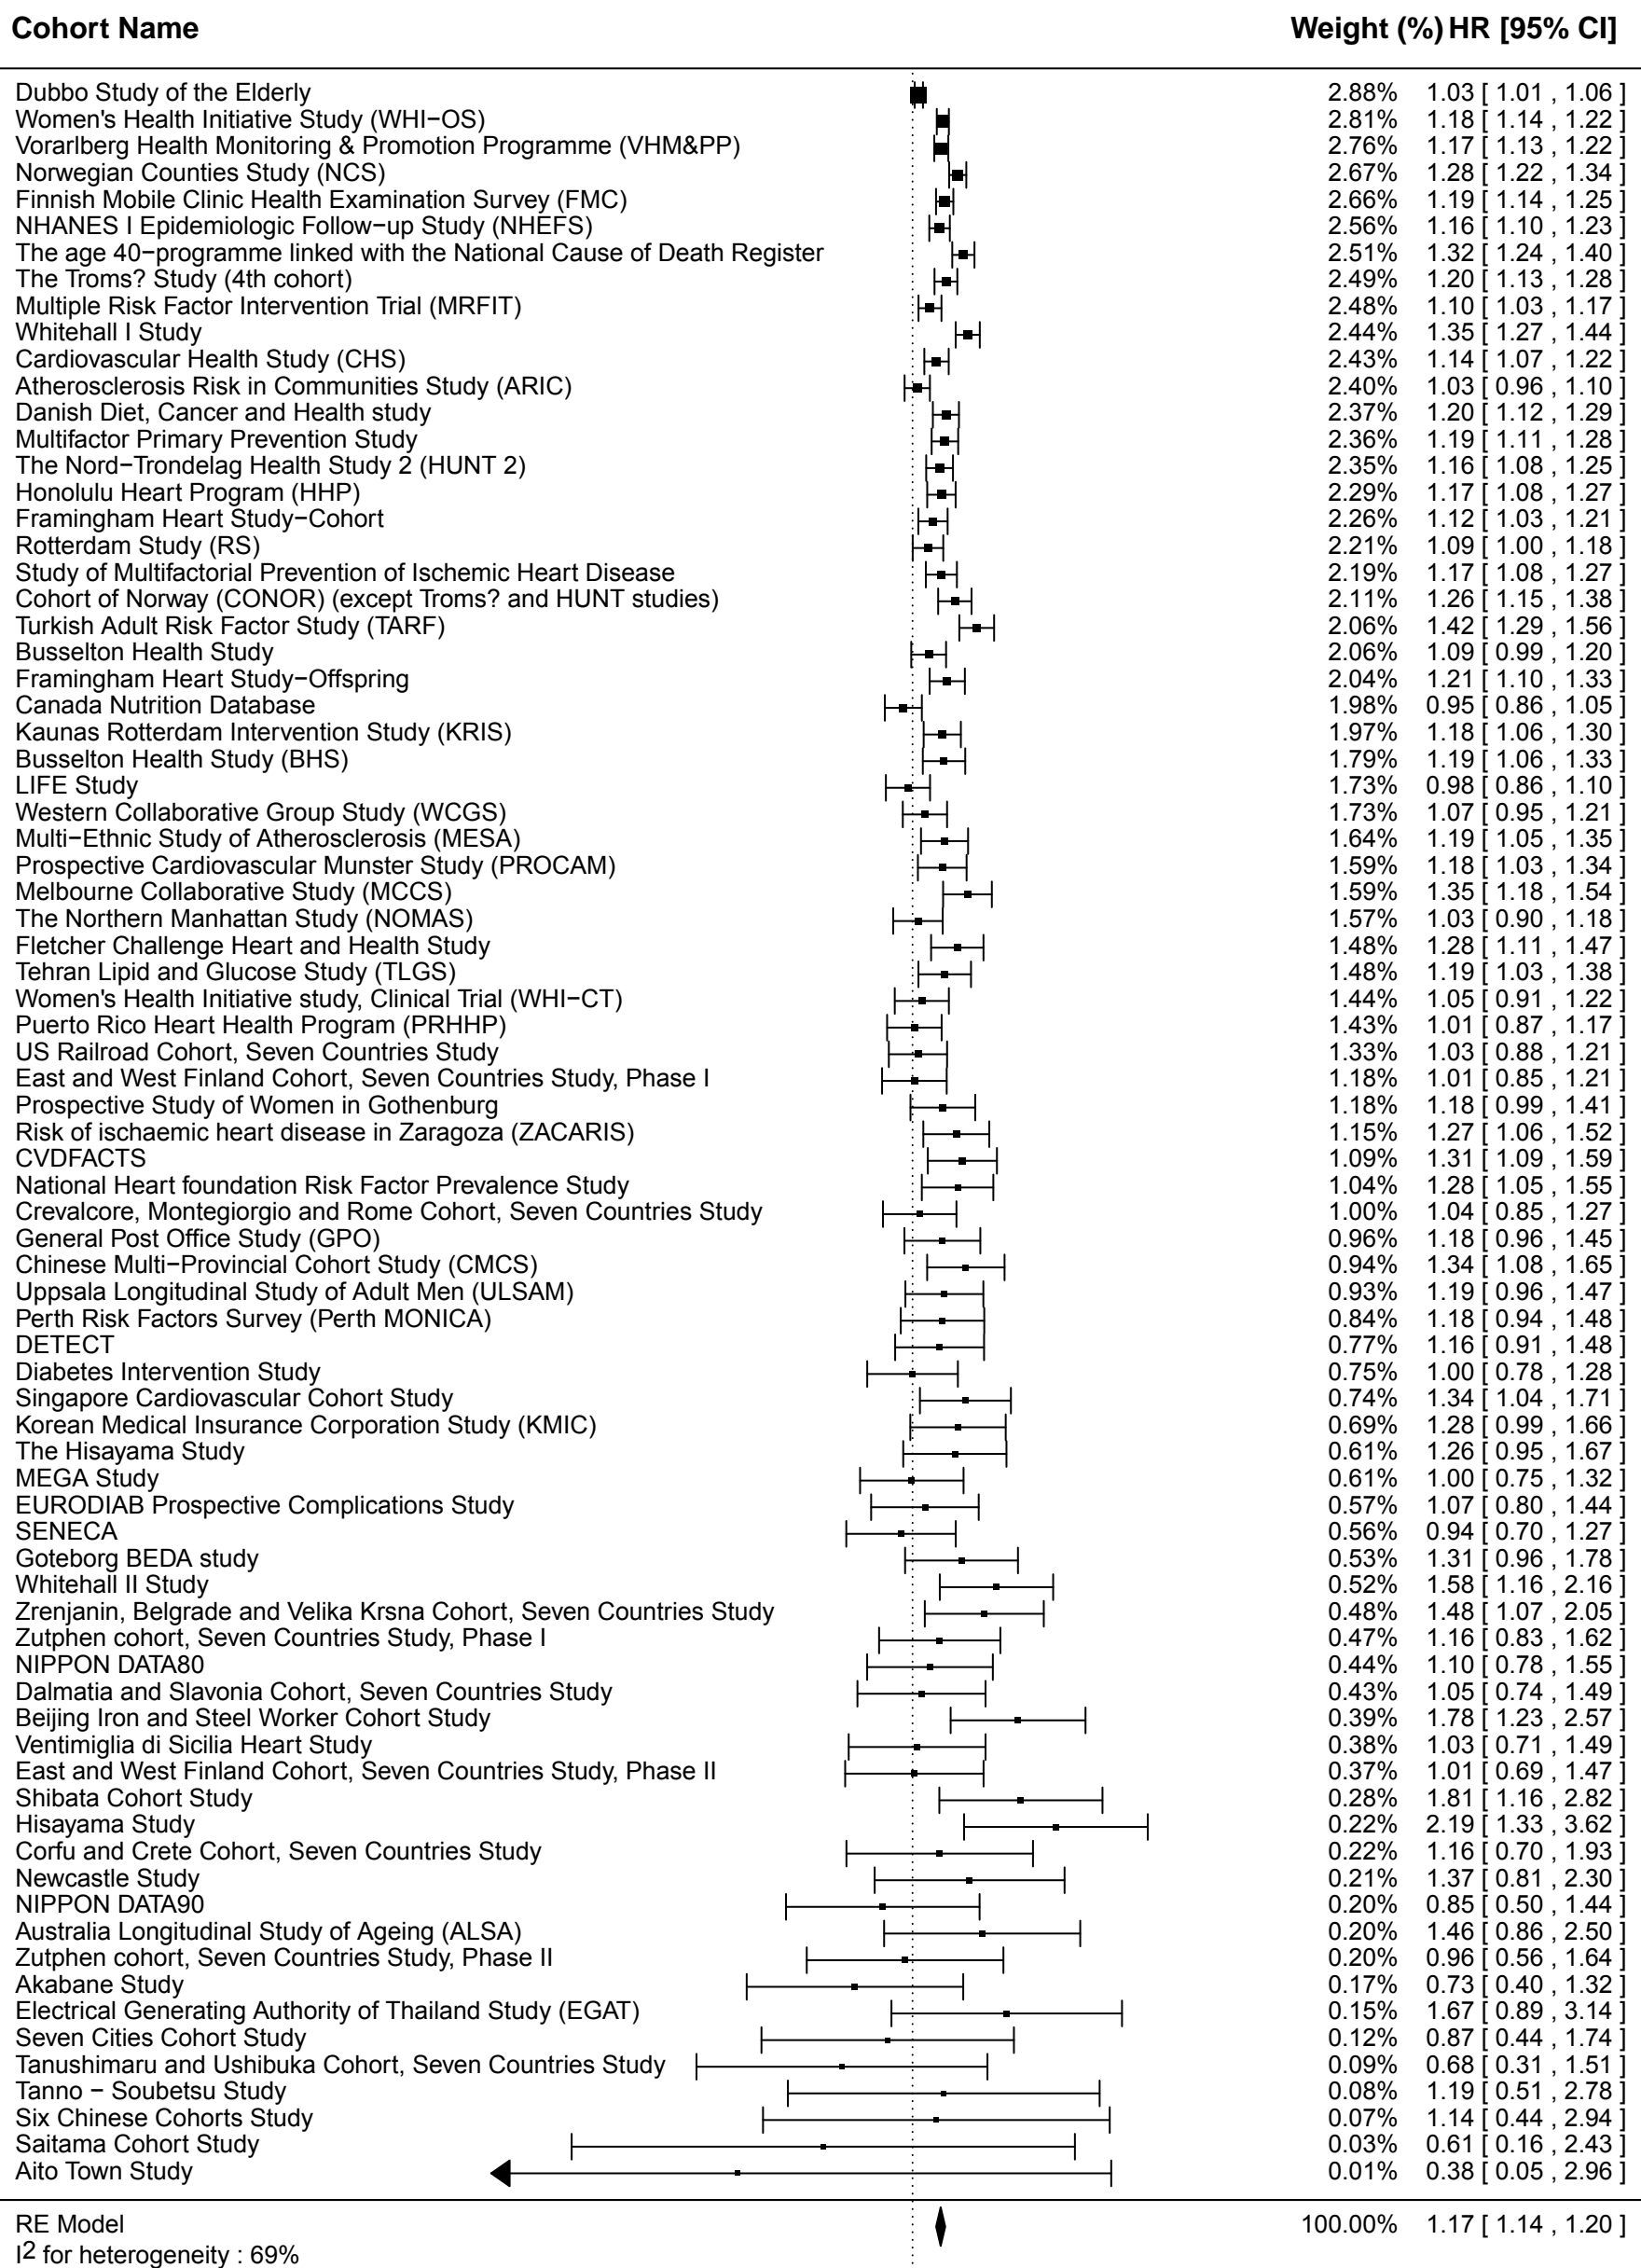

Cohort Name

Weight (%) HR [95% CI]

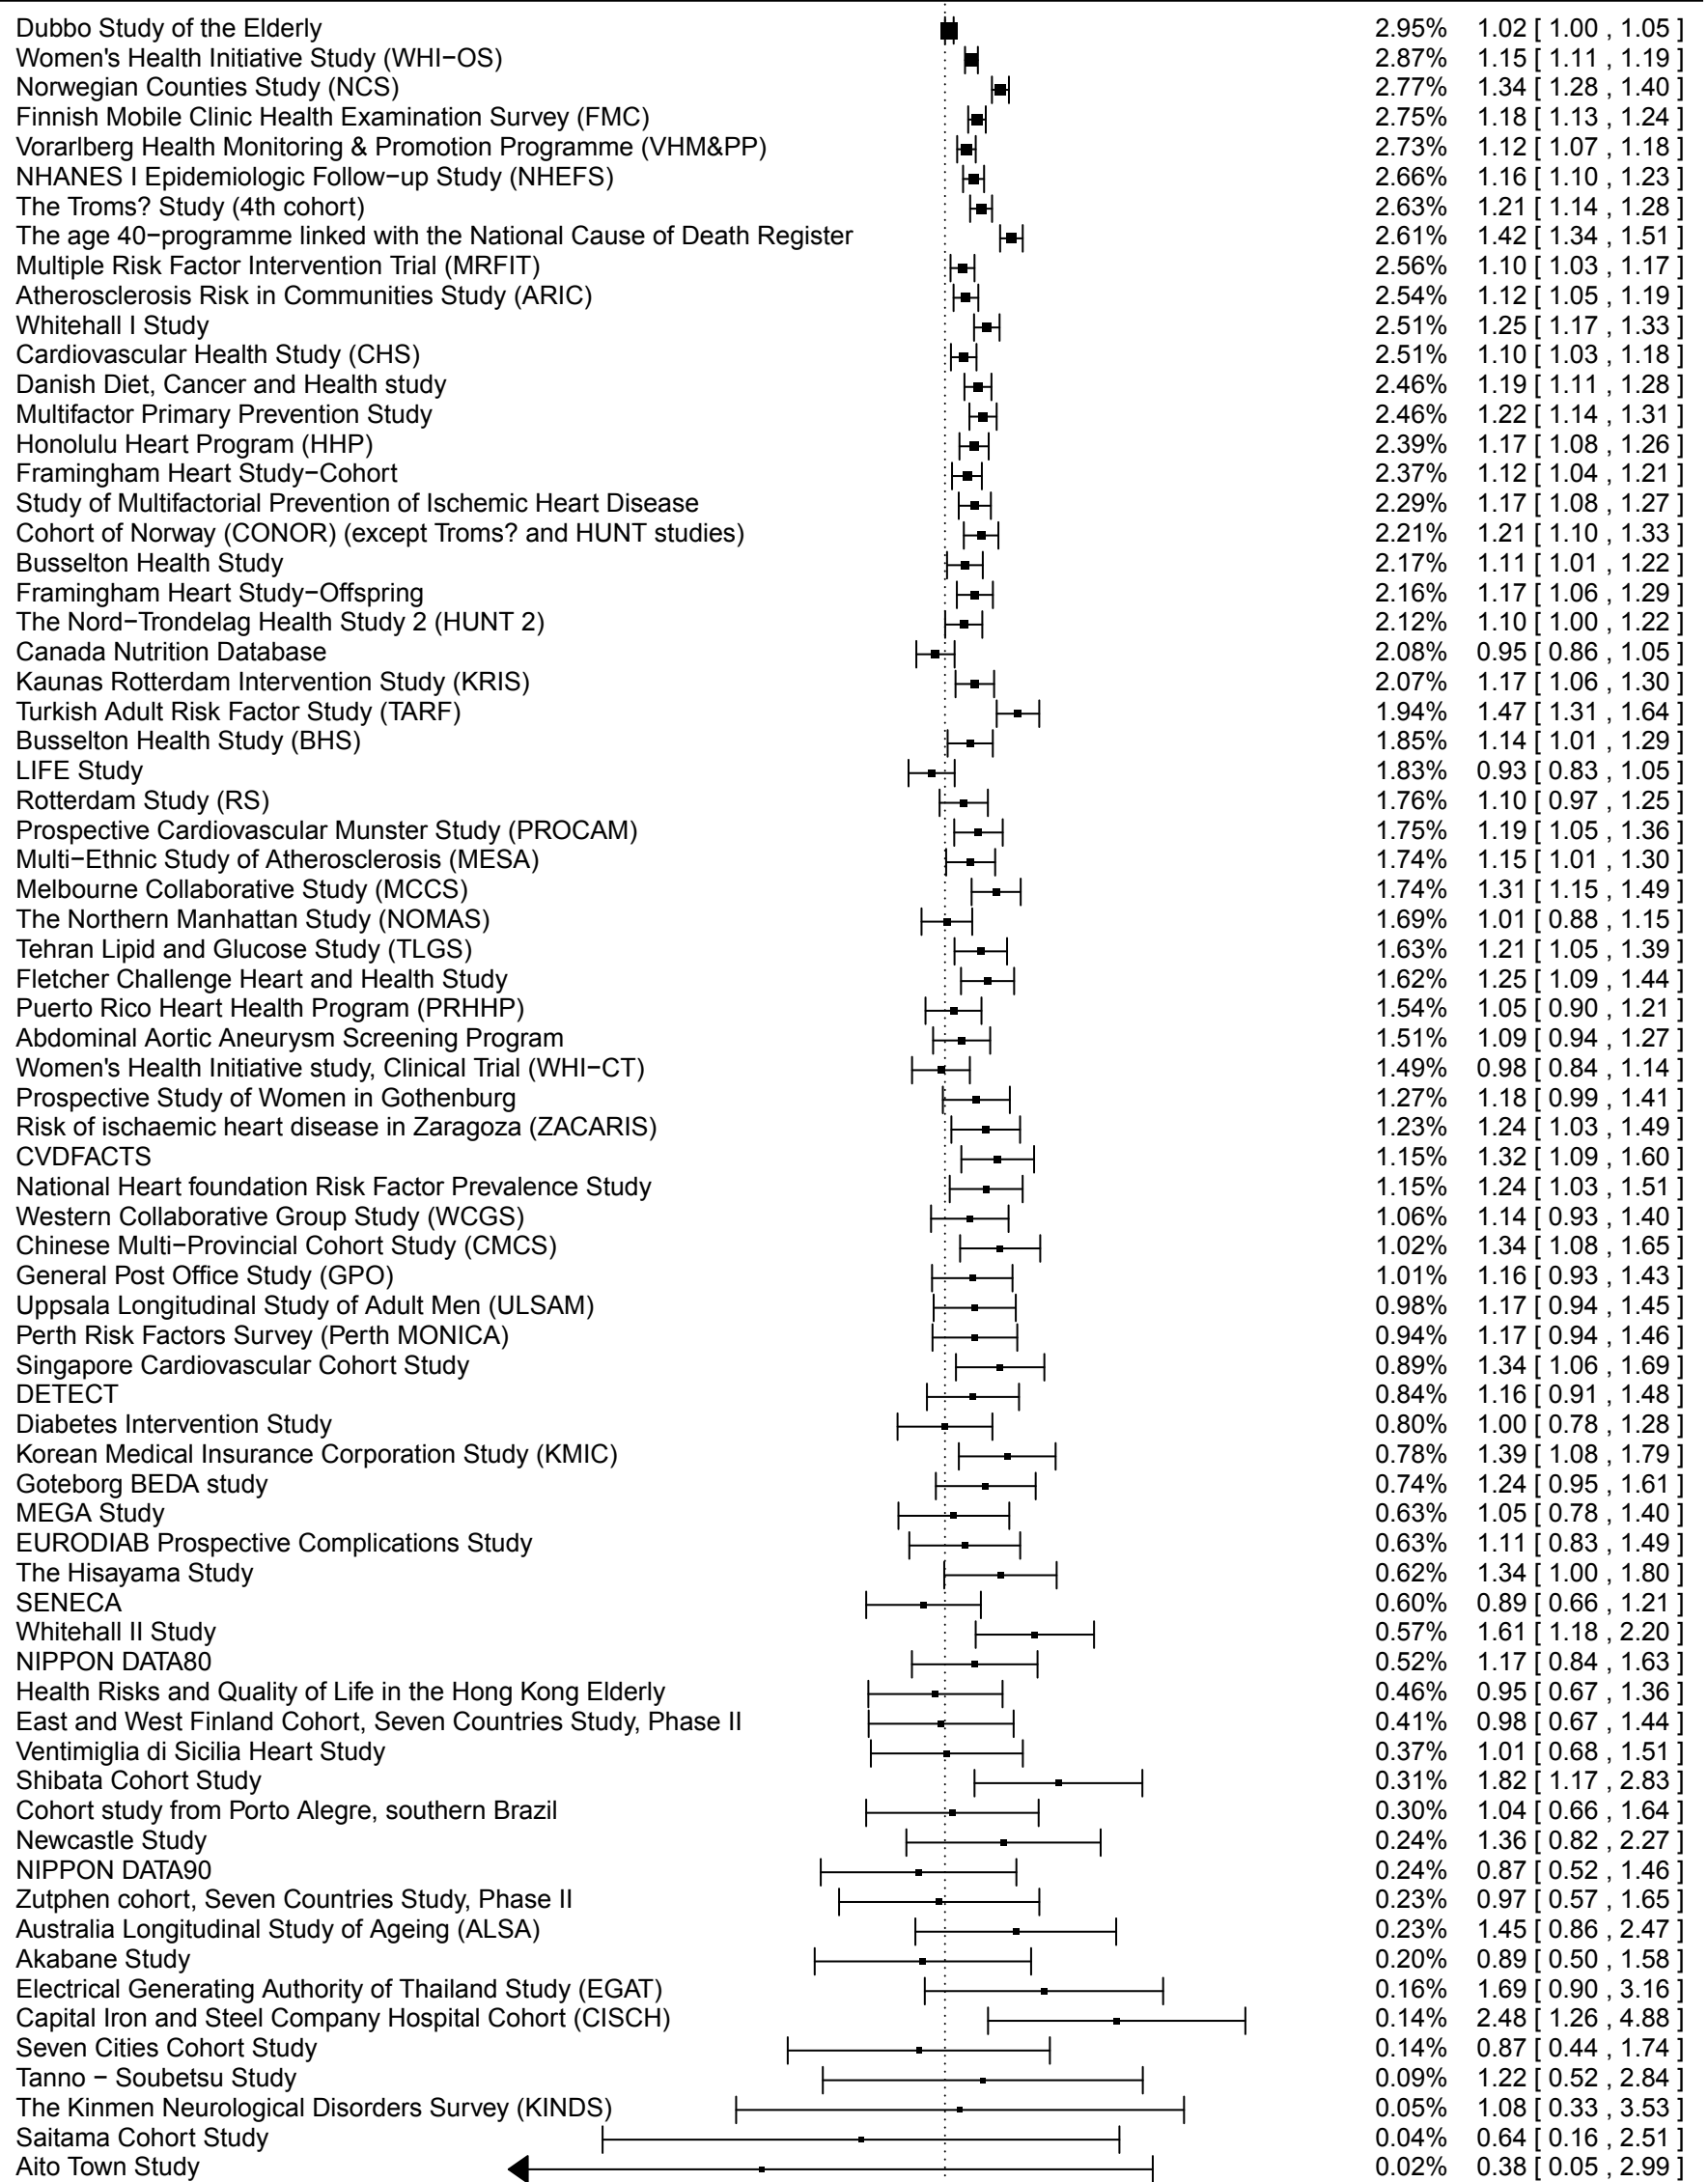

RE Model 100.00% 1.16 [ 1.13 , 1.19 ]  
 I<sup>2</sup> for heterogeneity : 72%

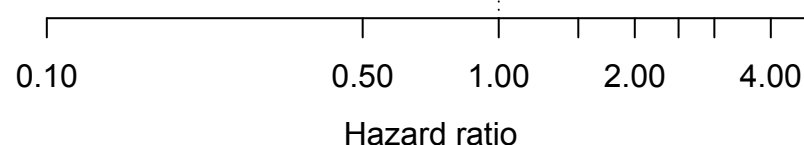

Cohort Name

Weight (%) HR [95% CI]

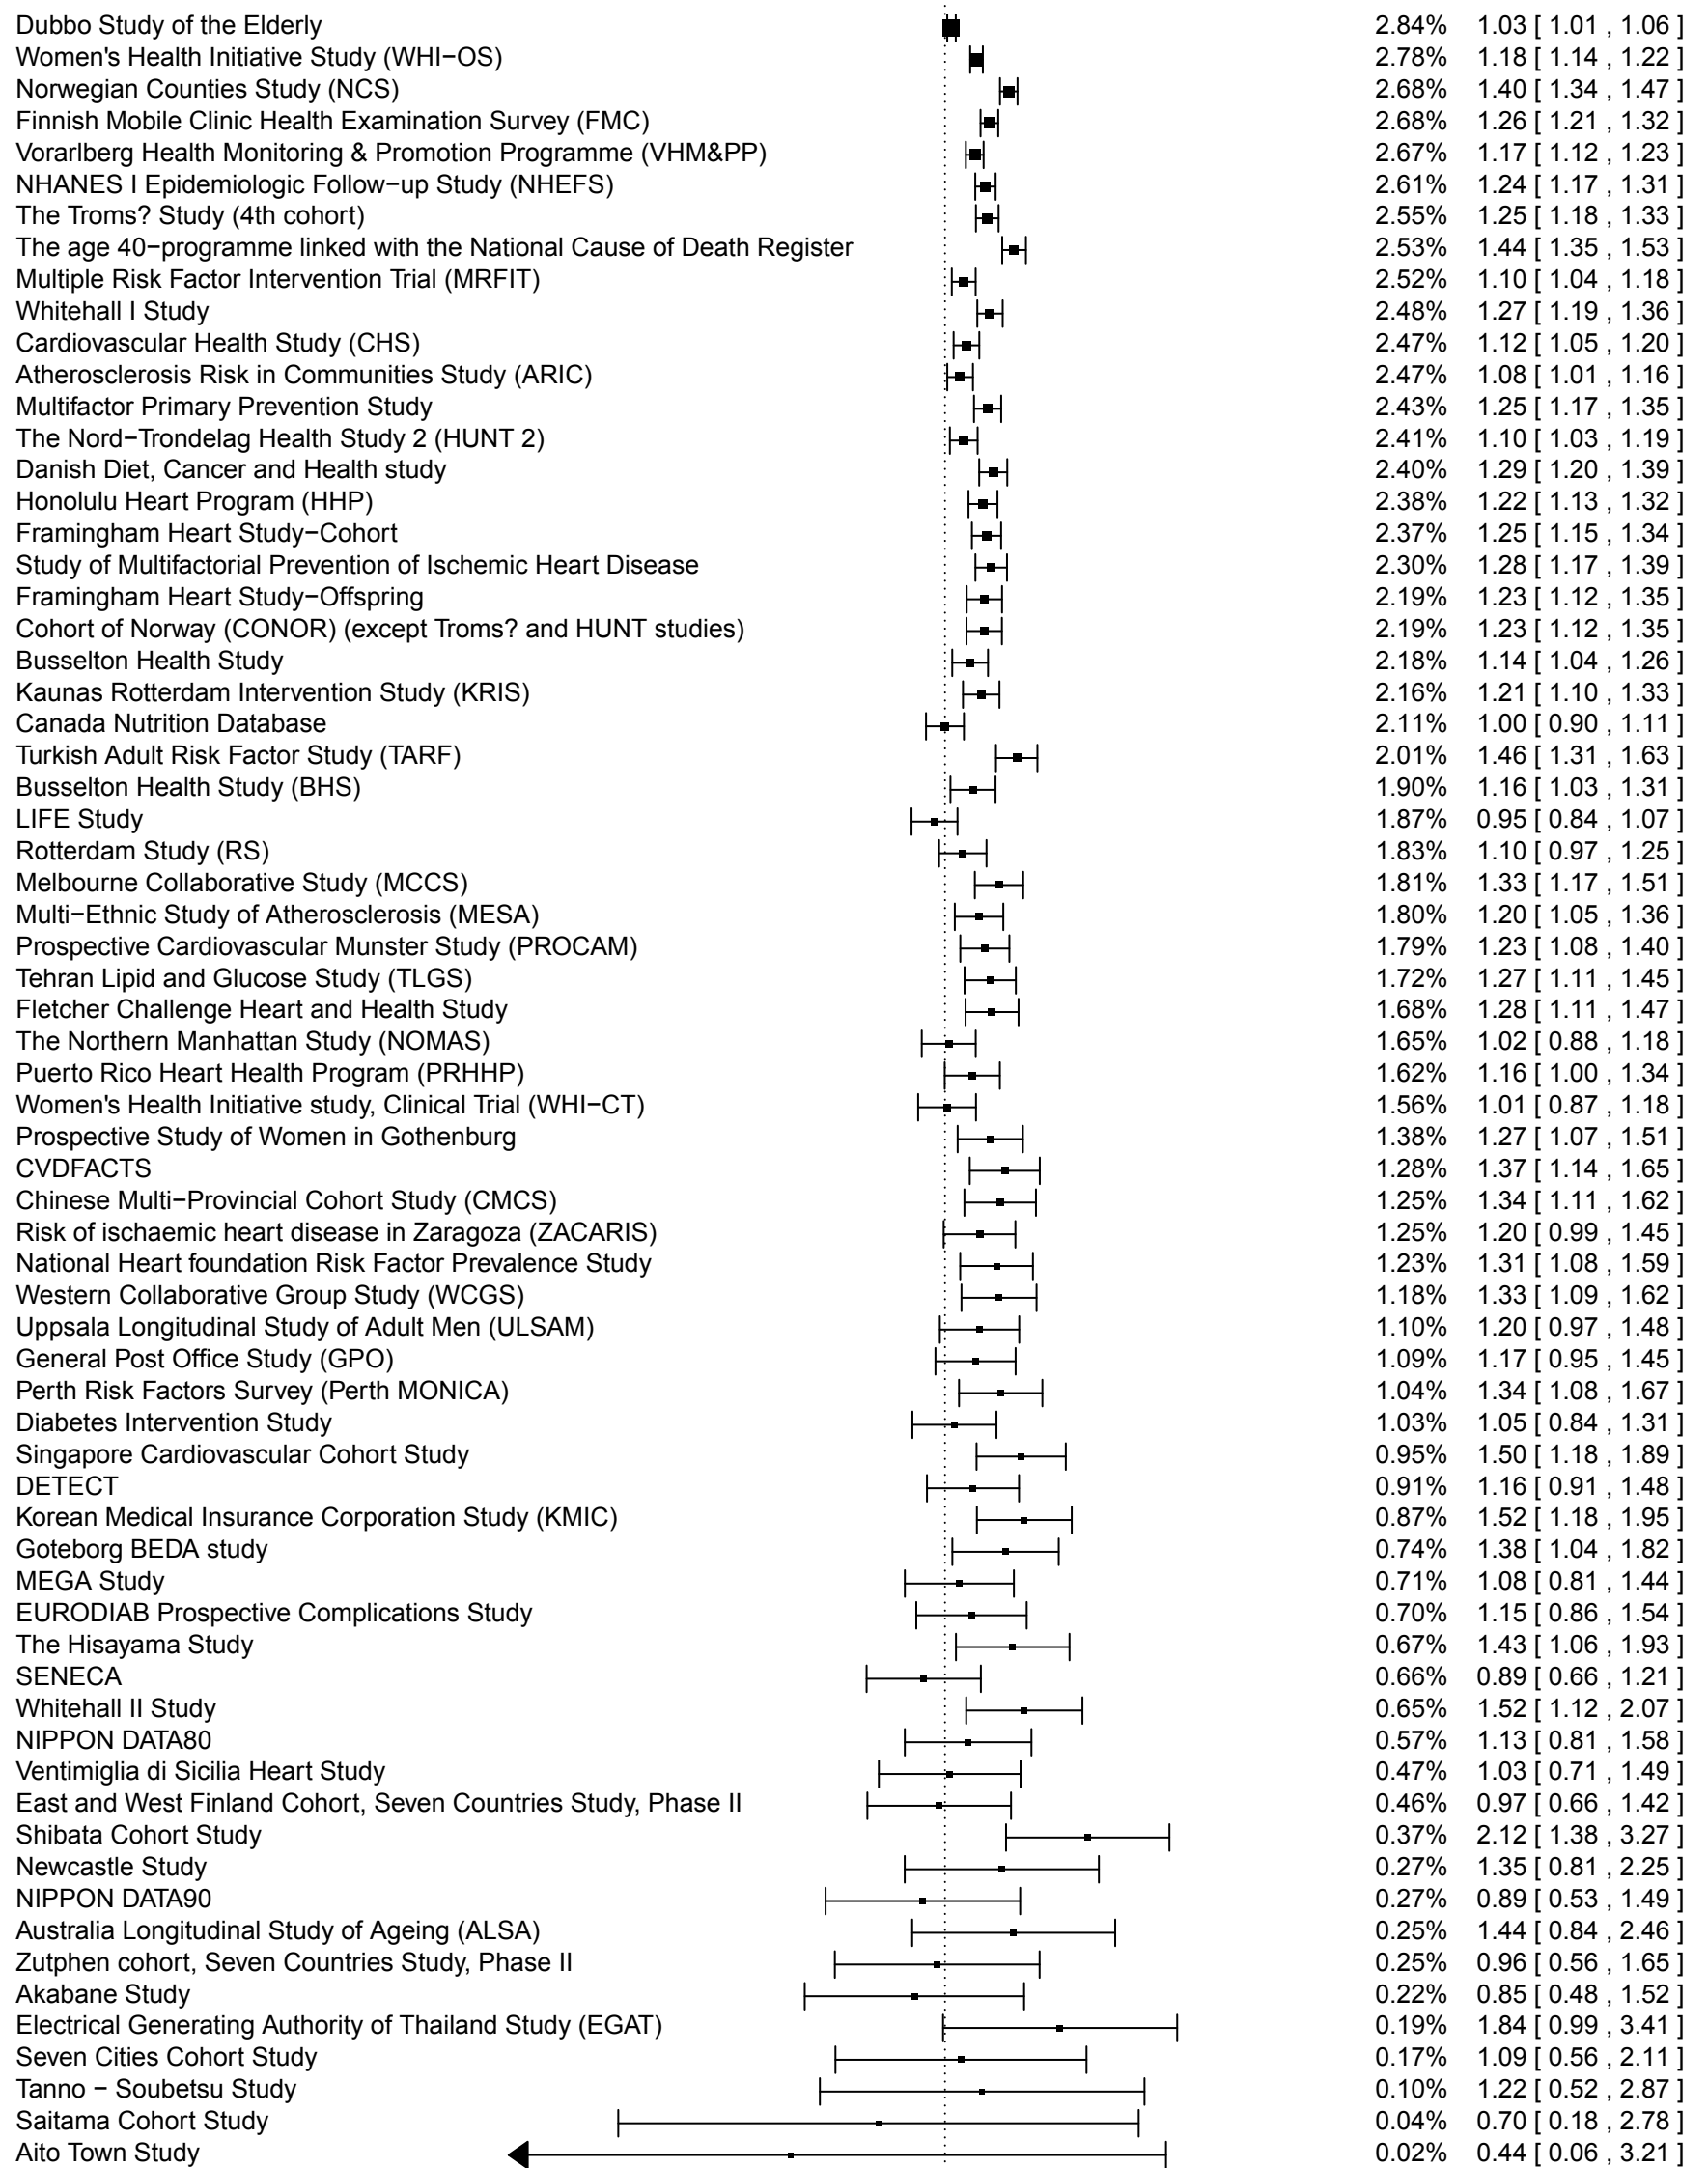

RE Model 100.00% 1.21 [ 1.17 , 1.24 ]

I<sup>2</sup> for heterogeneity : 77%

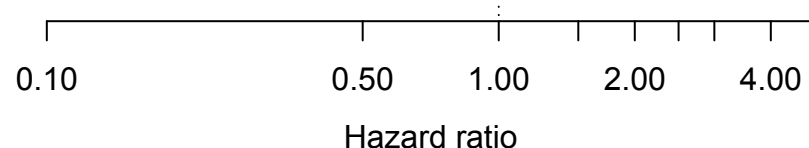

Cohort Name

Weight (%) HR [95% CI]

|                                                                       |       |                      |
|-----------------------------------------------------------------------|-------|----------------------|
| Dubbo Study of the Elderly                                            | 3.28% | 1.02 [ 1.00 , 1.05 ] |
| Women's Health Initiative Study (WHI-OS)                              | 3.17% | 1.15 [ 1.11 , 1.19 ] |
| Finnish Mobile Clinic Health Examination Survey (FMC)                 | 3.01% | 1.19 [ 1.13 , 1.25 ] |
| Norwegian Counties Study (NCS)                                        | 2.96% | 1.28 [ 1.22 , 1.35 ] |
| Vorarlberg Health Monitoring & Promotion Programme (VHM&PP)           | 2.92% | 1.12 [ 1.06 , 1.18 ] |
| NHANES I Epidemiologic Follow-up Study (NHEFS)                        | 2.88% | 1.15 [ 1.09 , 1.21 ] |
| The age 40-programme linked with the National Cause of Death Register | 2.80% | 1.30 [ 1.22 , 1.38 ] |
| The Troms? Study (4th cohort)                                         | 2.77% | 1.18 [ 1.11 , 1.26 ] |
| Multiple Risk Factor Intervention Trial (MRFIT)                       | 2.77% | 1.10 [ 1.04 , 1.18 ] |
| Whitehall I Study                                                     | 2.71% | 1.24 [ 1.16 , 1.33 ] |
| Cardiovascular Health Study (CHS)                                     | 2.70% | 1.10 [ 1.03 , 1.18 ] |
| Atherosclerosis Risk in Communities Study (ARIC)                      | 2.66% | 1.03 [ 0.96 , 1.11 ] |
| Danish Diet, Cancer and Health study                                  | 2.63% | 1.18 [ 1.10 , 1.27 ] |
| Multifactor Primary Prevention Study                                  | 2.62% | 1.17 [ 1.09 , 1.26 ] |
| Honolulu Heart Program (HHP)                                          | 2.54% | 1.15 [ 1.06 , 1.24 ] |
| Framingham Heart Study-Cohort                                         | 2.50% | 1.12 [ 1.03 , 1.21 ] |
| Study of Multifactorial Prevention of Ischemic Heart Disease          | 2.42% | 1.15 [ 1.06 , 1.26 ] |
| Cohort of Norway (CONOR) (except Troms? and HUNT studies)             | 2.32% | 1.21 [ 1.10 , 1.33 ] |
| Busselton Health Study                                                | 2.26% | 1.08 [ 0.99 , 1.19 ] |
| Framingham Heart Study-Offspring                                      | 2.23% | 1.16 [ 1.05 , 1.28 ] |
| The Nord-Trøndelag Health Study 2 (HUNT 2)                            | 2.22% | 1.10 [ 1.00 , 1.22 ] |
| Canada Nutrition Database                                             | 2.15% | 0.90 [ 0.82 , 1.00 ] |
| Kaunas Rotterdam Intervention Study (KRIS)                            | 2.12% | 1.16 [ 1.05 , 1.29 ] |
| Turkish Adult Risk Factor Study (TARF)                                | 1.96% | 1.43 [ 1.27 , 1.61 ] |
| Busselton Health Study (BHS)                                          | 1.90% | 1.13 [ 1.00 , 1.27 ] |
| LIFE Study                                                            | 1.87% | 0.95 [ 0.84 , 1.07 ] |
| Rotterdam Study (RS)                                                  | 1.79% | 1.09 [ 0.96 , 1.24 ] |
| Melbourne Collaborative Study (MCCS)                                  | 1.72% | 1.31 [ 1.15 , 1.50 ] |
| Prospective Cardiovascular Munster Study (PROCAM)                     | 1.71% | 1.15 [ 1.00 , 1.31 ] |
| Tehran Lipid and Glucose Study (TLGS)                                 | 1.62% | 1.17 [ 1.02 , 1.35 ] |
| Fletcher Challenge Heart and Health Study                             | 1.60% | 1.23 [ 1.07 , 1.42 ] |
| Multi-Ethnic Study of Atherosclerosis (MESA)                          | 1.58% | 1.17 [ 1.01 , 1.35 ] |
| The Northern Manhattan Study (NOMAS)                                  | 1.57% | 0.99 [ 0.86 , 1.14 ] |
| Puerto Rico Heart Health Program (PRHHP)                              | 1.52% | 1.00 [ 0.86 , 1.17 ] |
| Women's Health Initiative study, Clinical Trial (WHI-CT)              | 1.48% | 0.99 [ 0.85 , 1.16 ] |
| Prospective Study of Women in Gothenburg                              | 1.25% | 1.18 [ 0.99 , 1.41 ] |
| Risk of ischaemic heart disease in Zaragoza (ZACARIS)                 | 1.16% | 1.24 [ 1.03 , 1.50 ] |
| CVDFACTS                                                              | 1.14% | 1.30 [ 1.08 , 1.58 ] |
| National Heart foundation Risk Factor Prevalence Study                | 1.08% | 1.26 [ 1.03 , 1.53 ] |
| Western Collaborative Group Study (WCGS)                              | 1.03% | 1.14 [ 0.93 , 1.40 ] |
| Chinese Multi-Provincial Cohort Study (CMCS)                          | 0.98% | 1.34 [ 1.08 , 1.65 ] |
| General Post Office Study (GPO)                                       | 0.98% | 1.15 [ 0.93 , 1.42 ] |
| Uppsala Longitudinal Study of Adult Men (ULSAM)                       | 0.97% | 1.16 [ 0.94 , 1.44 ] |
| DETECT                                                                | 0.93% | 1.16 [ 0.93 , 1.44 ] |
| Perth Risk Factors Survey (Perth MONICA)                              | 0.88% | 1.18 [ 0.94 , 1.48 ] |
| Singapore Cardiovascular Cohort Study                                 | 0.78% | 1.30 [ 1.02 , 1.66 ] |
| Diabetes Intervention Study                                           | 0.78% | 1.00 [ 0.78 , 1.28 ] |
| Korean Medical Insurance Corporation Study (KMIC)                     | 0.72% | 1.28 [ 0.99 , 1.66 ] |
| Goteborg BEDA study                                                   | 0.61% | 1.20 [ 0.90 , 1.61 ] |
| EURODIAB Prospective Complications Study                              | 0.60% | 1.10 [ 0.82 , 1.47 ] |
| MEGA Study                                                            | 0.60% | 1.04 [ 0.78 , 1.40 ] |
| The Hisayama Study                                                    | 0.58% | 1.31 [ 0.97 , 1.76 ] |
| SENECA                                                                | 0.56% | 0.89 [ 0.66 , 1.21 ] |
| Whitehall II Study                                                    | 0.53% | 1.53 [ 1.11 , 2.09 ] |
| NIPPON DATA80                                                         | 0.46% | 1.09 [ 0.77 , 1.54 ] |
| East and West Finland Cohort, Seven Countries Study, Phase II         | 0.38% | 0.98 [ 0.67 , 1.43 ] |
| Ventimiglia di Sicilia Heart Study                                    | 0.35% | 1.02 [ 0.68 , 1.52 ] |
| Shibata Cohort Study                                                  | 0.29% | 1.80 [ 1.16 , 2.82 ] |
| Newcastle Study                                                       | 0.21% | 1.35 [ 0.80 , 2.27 ] |
| NIPPON DATA90                                                         | 0.21% | 0.84 [ 0.50 , 1.42 ] |
| Australia Longitudinal Study of Ageing (ALSA)                         | 0.20% | 1.45 [ 0.85 , 2.47 ] |
| Zutphen cohort, Seven Countries Study, Phase II                       | 0.20% | 0.95 [ 0.56 , 1.63 ] |
| Akabane Study                                                         | 0.17% | 0.75 [ 0.41 , 1.37 ] |
| Electrical Generating Authority of Thailand Study (EGAT)              | 0.15% | 1.68 [ 0.89 , 3.16 ] |
| Seven Cities Cohort Study                                             | 0.13% | 0.88 [ 0.44 , 1.75 ] |
| Tanno - Soubetsu Study                                                | 0.08% | 1.16 [ 0.49 , 2.74 ] |
| Saitama Cohort Study                                                  | 0.03% | 0.63 [ 0.16 , 2.52 ] |
| Aito Town Study                                                       | 0.01% | 0.37 [ 0.05 , 2.99 ] |

RE Model 100.00% 1.15 [ 1.12 , 1.18 ]  
 I<sup>2</sup> for heterogeneity : 68%

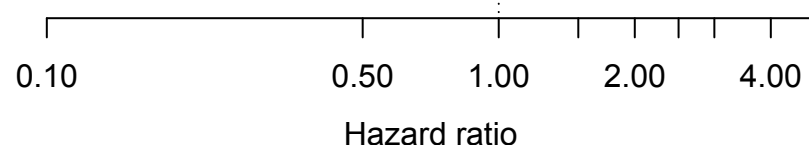

**Webfigure 3:** Cohort-specific hazard ratios (HRs) of stroke per 5 kg/m<sup>2</sup> higher BMI .

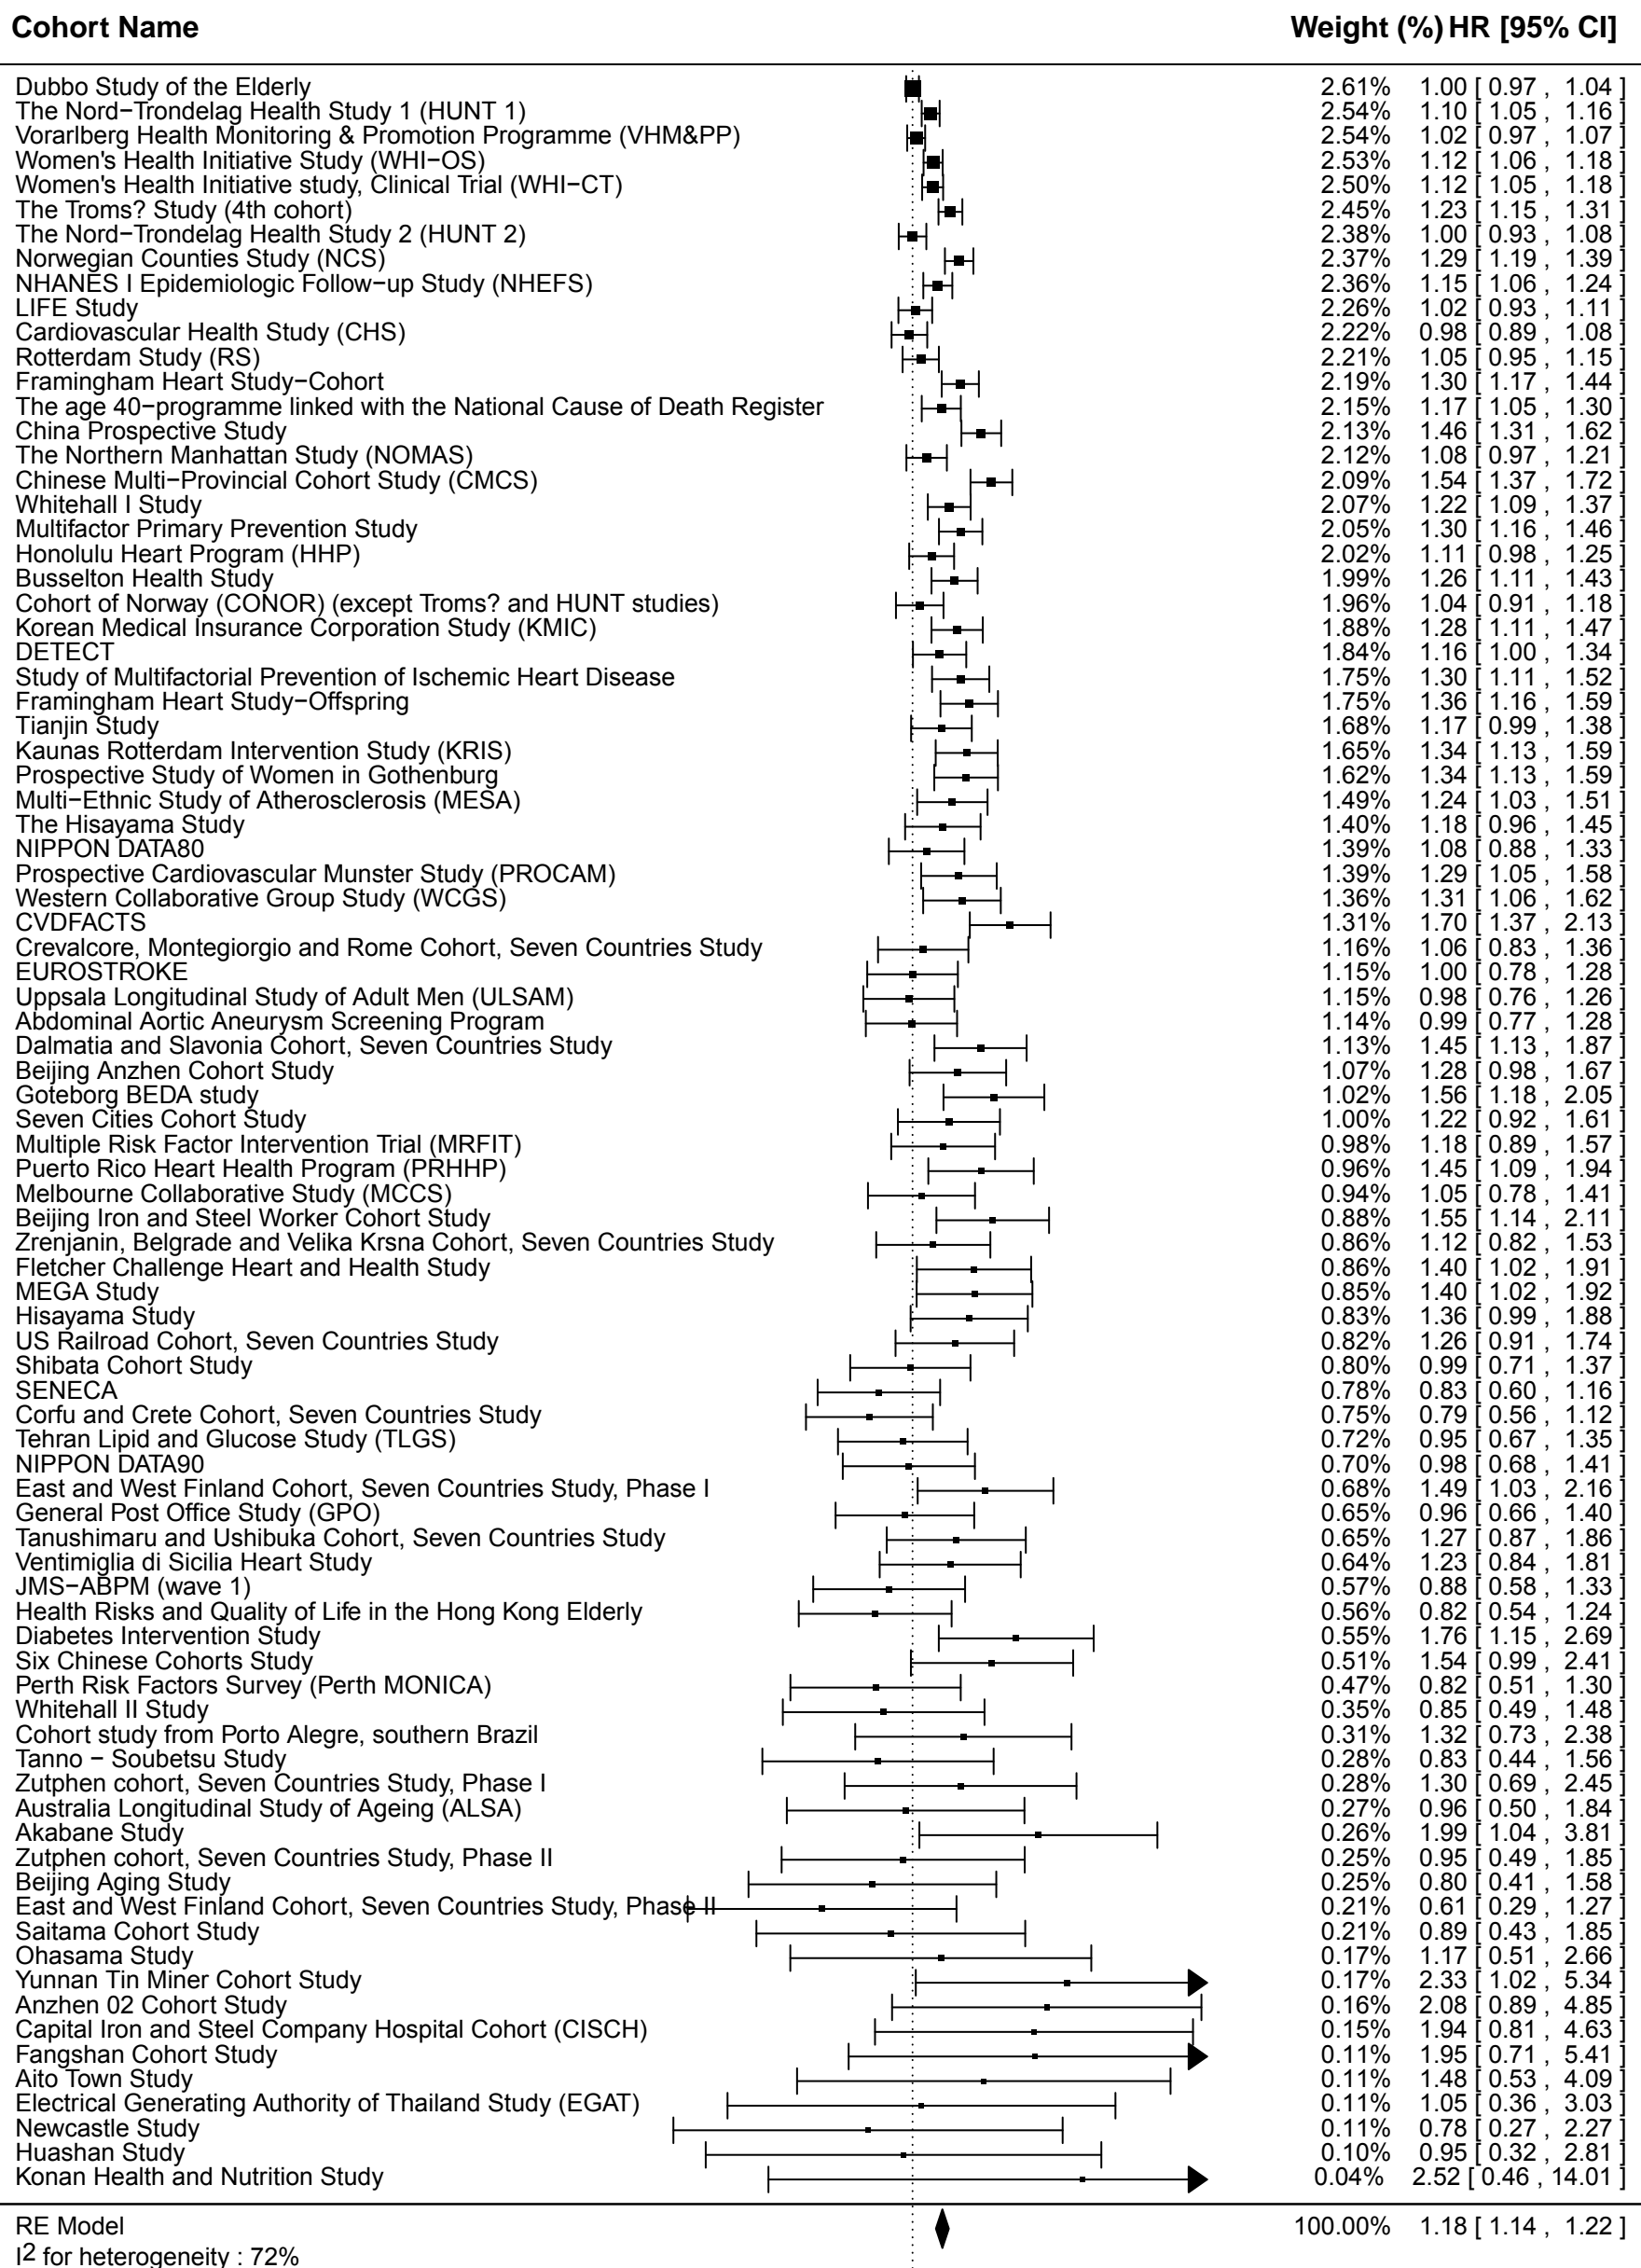

Cohort Name

Weight (%) HR [95% CI]

| Cohort Name                                                           | Weight (%) | HR   | 95% CI        |
|-----------------------------------------------------------------------|------------|------|---------------|
| Dubbo Study of the Elderly                                            | 3.74%      | 0.99 | [0.95, 1.02]  |
| Women's Health Initiative Study (WHI-OS)                              | 3.48%      | 1.08 | [1.02, 1.13]  |
| Vorarlberg Health Monitoring & Promotion Programme (VHM&PP)           | 3.41%      | 0.95 | [0.90, 1.01]  |
| Women's Health Initiative study, Clinical Trial (WHI-CT)              | 3.40%      | 1.07 | [1.01, 1.14]  |
| The Troms? Study (4th cohort)                                         | 3.18%      | 1.13 | [1.05, 1.21]  |
| The Nord-Trøndelag Health Study 2 (HUNT 2)                            | 3.10%      | 0.95 | [0.88, 1.03]  |
| NHANES I Epidemiologic Follow-up Study (NHEFS)                        | 2.99%      | 1.05 | [0.97, 1.14]  |
| Norwegian Counties Study (NCS)                                        | 2.98%      | 1.16 | [1.07, 1.26]  |
| LIFE Study                                                            | 2.79%      | 1.01 | [0.92, 1.10]  |
| Multifactor Primary Prevention Study                                  | 2.72%      | 1.21 | [1.10, 1.33]  |
| Cardiovascular Health Study (CHS)                                     | 2.69%      | 0.96 | [0.87, 1.06]  |
| Rotterdam Study (RS)                                                  | 2.66%      | 1.02 | [0.92, 1.13]  |
| Framingham Heart Study-Cohort                                         | 2.54%      | 1.11 | [1.00, 1.24]  |
| China Prospective Study                                               | 2.46%      | 1.23 | [1.10, 1.38]  |
| The age 40-programme linked with the National Cause of Death Register | 2.44%      | 0.98 | [0.88, 1.10]  |
| The Northern Manhattan Study (NOMAS)                                  | 2.42%      | 1.05 | [0.94, 1.18]  |
| Whitehall I Study                                                     | 2.38%      | 1.22 | [1.09, 1.37]  |
| Honolulu Heart Program (HHP)                                          | 2.22%      | 0.99 | [0.87, 1.12]  |
| Busselton Health Study                                                | 2.21%      | 1.17 | [1.03, 1.32]  |
| Cohort of Norway (CONOR) (except Troms? and HUNT studies)             | 2.20%      | 0.98 | [0.86, 1.11]  |
| Korean Medical Insurance Corporation Study (KMIC)                     | 1.96%      | 0.97 | [0.84, 1.12]  |
| Chinese Multi-Provincial Cohort Study (CMCS)                          | 1.93%      | 1.16 | [1.00, 1.34]  |
| Study of Multifactorial Prevention of Ischemic Heart Disease          | 1.73%      | 1.03 | [0.88, 1.21]  |
| Framingham Heart Study-Offspring                                      | 1.70%      | 1.22 | [1.03, 1.43]  |
| Tianjin Study                                                         | 1.60%      | 0.98 | [0.82, 1.16]  |
| Prospective Study of Women in Gothenburg                              | 1.52%      | 1.27 | [1.06, 1.52]  |
| Kaunas Rotterdam Intervention Study (KRIS)                            | 1.44%      | 1.26 | [1.04, 1.52]  |
| DETECT                                                                | 1.36%      | 1.10 | [0.91, 1.34]  |
| Multi-Ethnic Study of Atherosclerosis (MESA)                          | 1.36%      | 1.19 | [0.98, 1.45]  |
| NIPPON DATA80                                                         | 1.27%      | 0.98 | [0.80, 1.21]  |
| The Hisayama Study                                                    | 1.26%      | 1.05 | [0.85, 1.29]  |
| Prospective Cardiovascular Munster Study (PROCAM)                     | 1.20%      | 1.18 | [0.95, 1.46]  |
| Western Collaborative Group Study (WCGS)                              | 1.17%      | 1.11 | [0.89, 1.38]  |
| The Nord-Trøndelag Health Study 1 (HUNT 1)                            | 1.07%      | 0.86 | [0.68, 1.08]  |
| CVDFACTS                                                              | 1.07%      | 1.42 | [1.12, 1.79]  |
| EUROSTROKE                                                            | 0.97%      | 1.00 | [0.78, 1.28]  |
| Abdominal Aortic Aneurysm Screening Program                           | 0.95%      | 0.97 | [0.75, 1.25]  |
| Crevalcore, Montegiorgio and Rome Cohort, Seven Countries Study       | 0.94%      | 0.90 | [0.70, 1.16]  |
| Uppsala Longitudinal Study of Adult Men (ULSAM)                       | 0.92%      | 0.88 | [0.68, 1.14]  |
| Dalmatia and Slavonia Cohort, Seven Countries Study                   | 0.83%      | 1.21 | [0.92, 1.60]  |
| Beijing Anzhen Cohort Study                                           | 0.82%      | 1.11 | [0.84, 1.47]  |
| Goteborg BEDA study                                                   | 0.82%      | 1.46 | [1.10, 1.92]  |
| Multiple Risk Factor Intervention Trial (MRFIT)                       | 0.81%      | 1.16 | [0.88, 1.53]  |
| Seven Cities Cohort Study                                             | 0.76%      | 1.00 | [0.75, 1.34]  |
| Puerto Rico Heart Health Program (PRHHP)                              | 0.74%      | 1.24 | [0.92, 1.67]  |
| Melbourne Collaborative Study (MCCS)                                  | 0.73%      | 0.97 | [0.72, 1.31]  |
| Zrenjanin, Belgrade and Velika Krsna Cohort, Seven Countries Study    | 0.68%      | 1.01 | [0.74, 1.38]  |
| Beijing Iron and Steel Worker Cohort Study                            | 0.68%      | 1.22 | [0.89, 1.67]  |
| Hisayama Study                                                        | 0.67%      | 1.25 | [0.91, 1.71]  |
| Fletcher Challenge Heart and Health Study                             | 0.64%      | 1.21 | [0.88, 1.68]  |
| MEGA Study                                                            | 0.64%      | 1.30 | [0.94, 1.79]  |
| Shibata Cohort Study                                                  | 0.61%      | 0.88 | [0.63, 1.23]  |
| US Railroad Cohort, Seven Countries Study                             | 0.59%      | 1.00 | [0.71, 1.40]  |
| East and West Finland Cohort, Seven Countries Study, Phase I          | 0.59%      | 1.33 | [0.95, 1.87]  |
| SENECA                                                                | 0.58%      | 0.78 | [0.55, 1.09]  |
| NIPPON DATA90                                                         | 0.53%      | 0.96 | [0.67, 1.38]  |
| Corfu and Crete Cohort, Seven Countries Study                         | 0.53%      | 0.62 | [0.43, 0.89]  |
| Tehran Lipid and Glucose Study (TLGS)                                 | 0.50%      | 0.77 | [0.53, 1.12]  |
| Tanushimaru and Ushibuka Cohort, Seven Countries Study                | 0.48%      | 1.04 | [0.71, 1.53]  |
| General Post Office Study (GPO)                                       | 0.48%      | 0.90 | [0.62, 1.33]  |
| Ventimiglia di Sicilia Heart Study                                    | 0.42%      | 1.19 | [0.79, 1.79]  |
| Health Risks and Quality of Life in the Hong Kong Elderly             | 0.40%      | 0.77 | [0.51, 1.18]  |
| JMS-ABPM (wave 1)                                                     | 0.40%      | 0.89 | [0.58, 1.36]  |
| Diabetes Intervention Study                                           | 0.38%      | 1.54 | [1.00, 2.38]  |
| Six Chinese Cohorts Study                                             | 0.37%      | 1.20 | [0.77, 1.86]  |
| Perth Risk Factors Survey (Perth MONICA)                              | 0.33%      | 0.74 | [0.46, 1.17]  |
| Whitehall II Study                                                    | 0.25%      | 0.86 | [0.49, 1.49]  |
| Cohort study from Porto Alegre, southern Brazil                       | 0.24%      | 1.30 | [0.74, 2.28]  |
| Tanno - Soubetsu Study                                                | 0.19%      | 0.68 | [0.36, 1.29]  |
| Australia Longitudinal Study of Ageing (ALSA)                         | 0.18%      | 0.96 | [0.50, 1.84]  |
| Zutphen cohort, Seven Countries Study, Phase II                       | 0.17%      | 0.90 | [0.46, 1.76]  |
| Beijing Aging Study                                                   | 0.16%      | 0.71 | [0.36, 1.41]  |
| Zutphen cohort, Seven Countries Study, Phase I                        | 0.16%      | 1.07 | [0.53, 2.16]  |
| Akabane Study                                                         | 0.16%      | 1.40 | [0.69, 2.83]  |
| East and West Finland Cohort, Seven Countries Study, Phase II         | 0.14%      | 0.59 | [0.28, 1.24]  |
| Saitama Cohort Study                                                  | 0.14%      | 0.77 | [0.36, 1.61]  |
| Yunnan Tin Miner Cohort Study                                         | 0.11%      | 1.87 | [0.80, 4.39]  |
| Ohasama Study                                                         | 0.11%      | 1.09 | [0.46, 2.57]  |
| Anzhen 02 Cohort Study                                                | 0.10%      | 1.86 | [0.77, 4.50]  |
| Capital Iron and Steel Company Hospital Cohort (CISCH)                | 0.08%      | 1.25 | [0.46, 3.38]  |
| Aito Town Study                                                       | 0.07%      | 1.49 | [0.53, 4.16]  |
| Newcastle Study                                                       | 0.07%      | 0.76 | [0.27, 2.16]  |
| Electrical Generating Authority of Thailand Study (EGAT)              | 0.07%      | 0.93 | [0.33, 2.67]  |
| Fangshan Cohort Study                                                 | 0.07%      | 1.89 | [0.64, 5.54]  |
| Huashan Study                                                         | 0.07%      | 0.88 | [0.30, 2.63]  |
| Konan Health and Nutrition Study                                      | 0.02%      | 3.71 | [0.60, 22.90] |

RE Model 100.00% 1.06 [ 1.03 , 1.09 ]  
 I<sup>2</sup> for heterogeneity : 48%

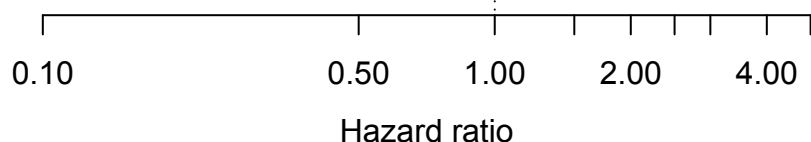

Cohort Name

Weight (%) HR [95% CI]

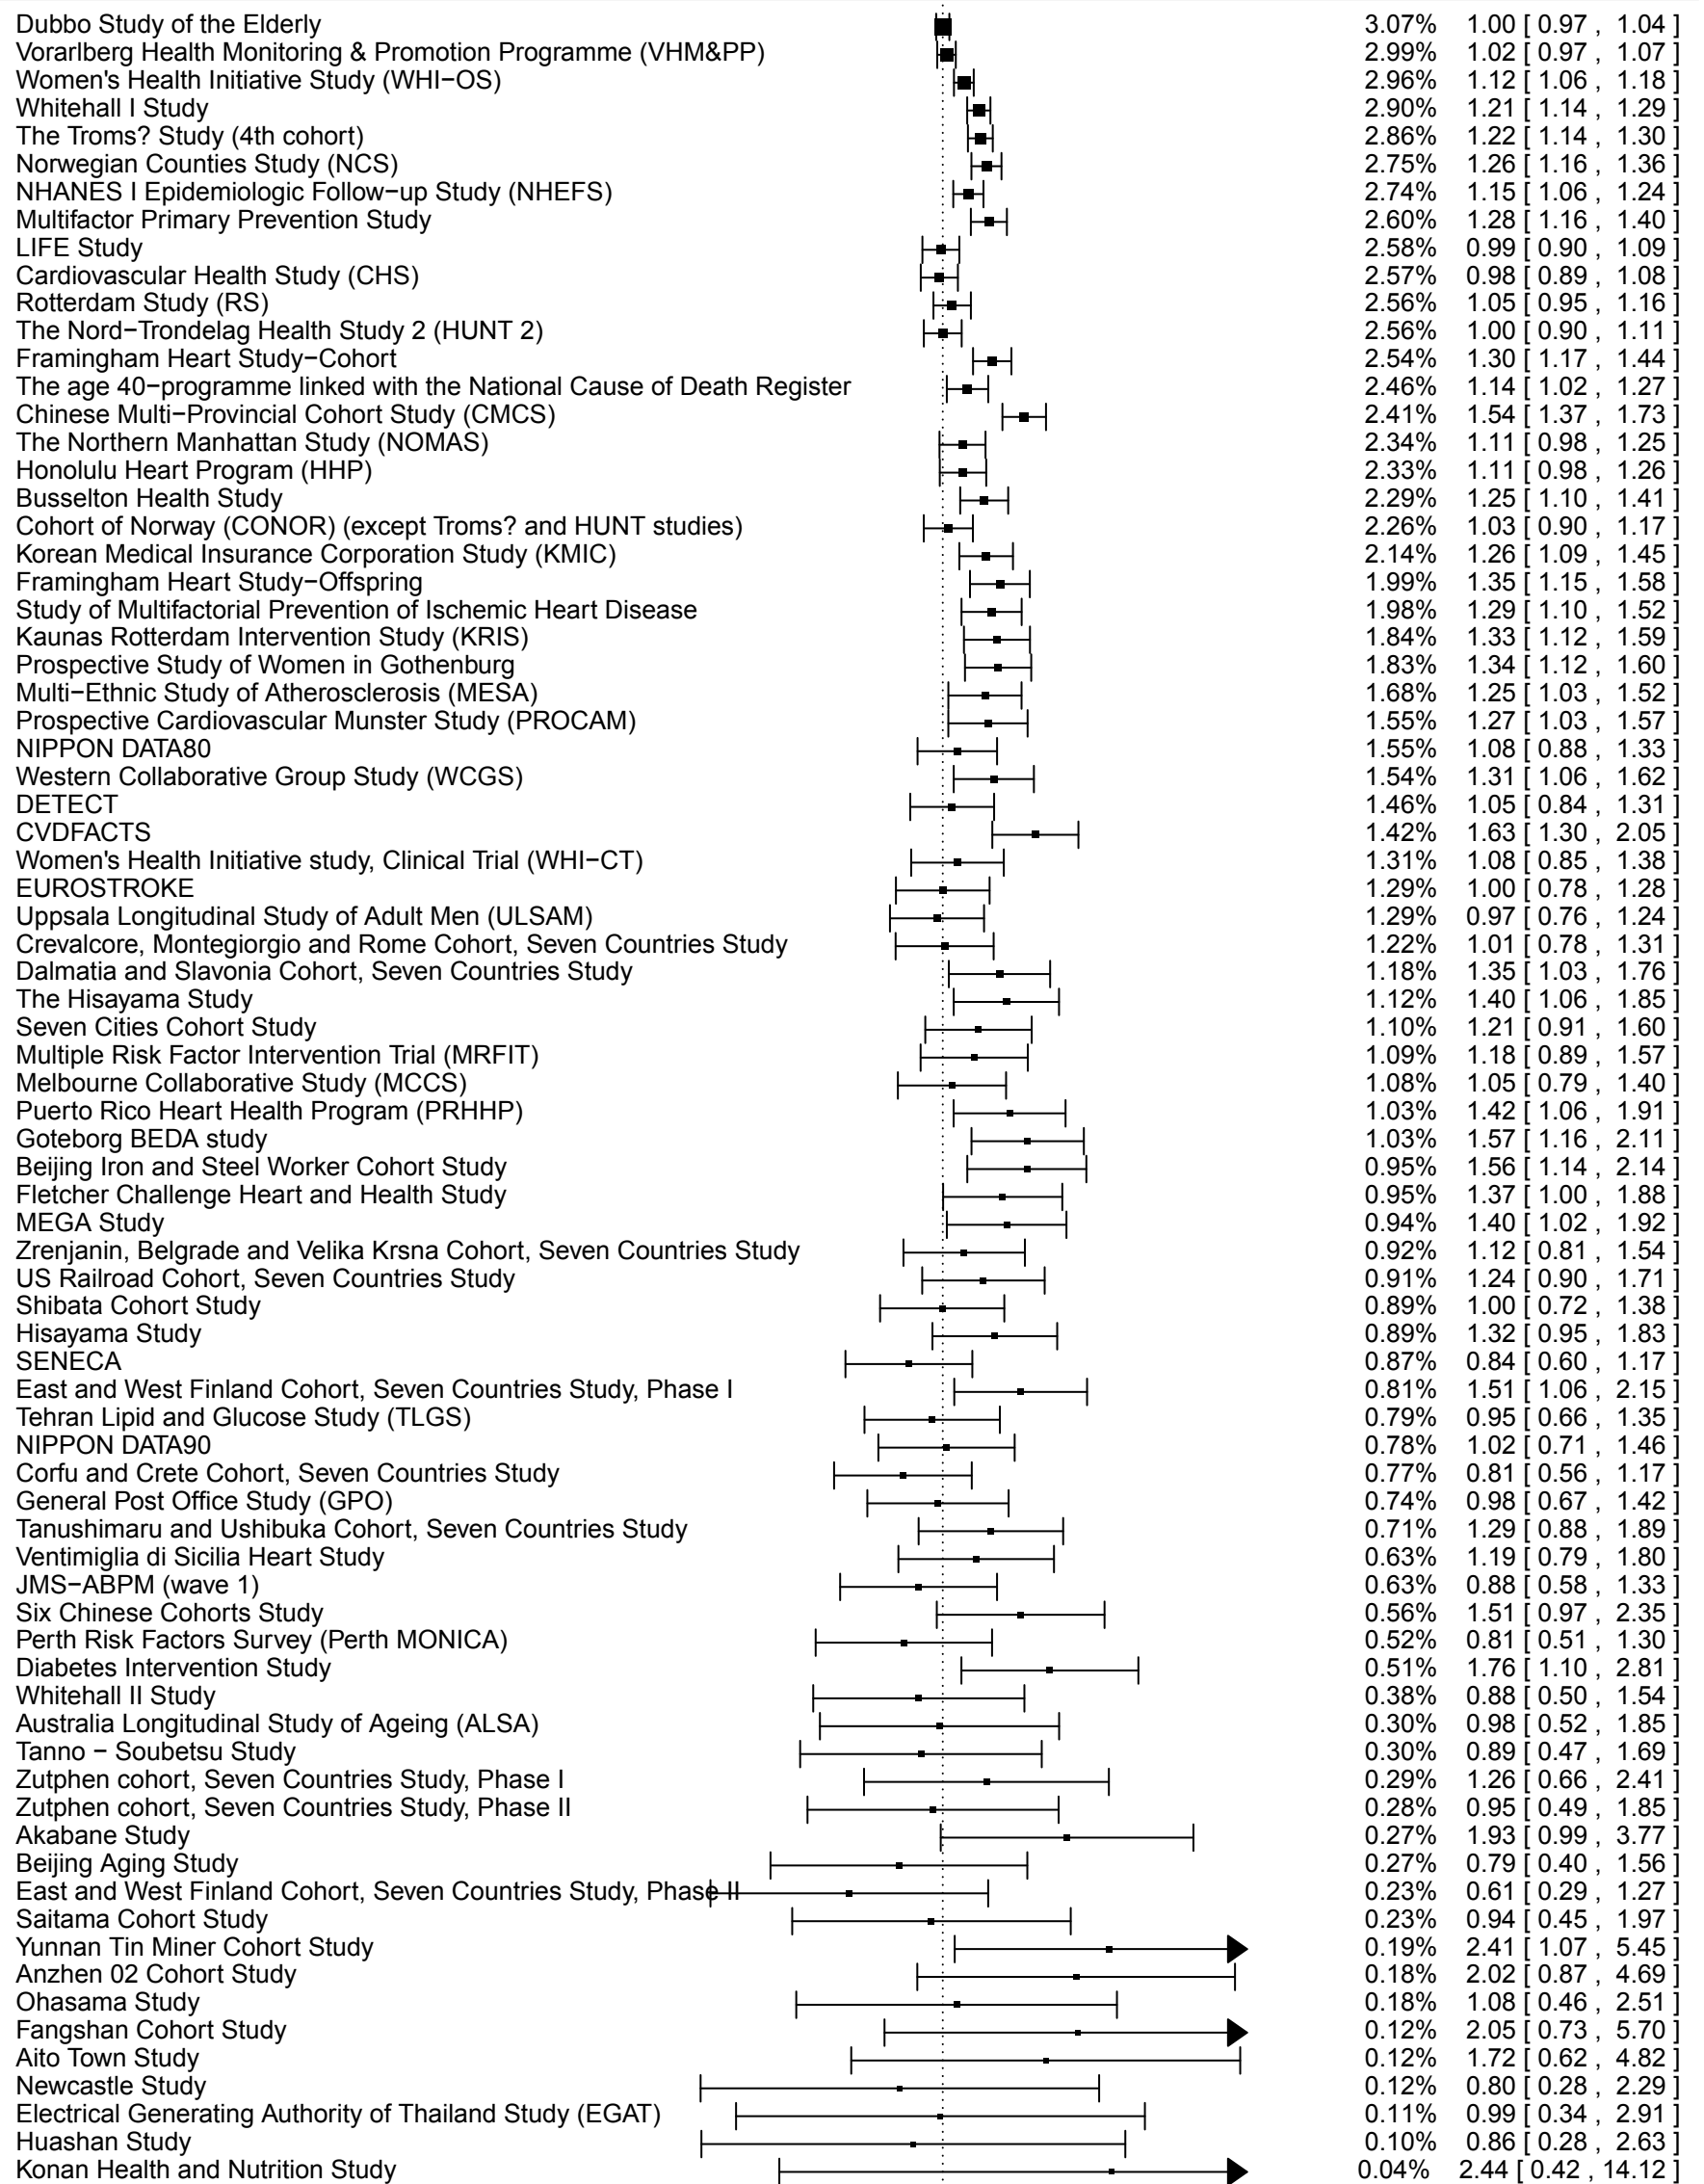

RE Model 100.00% 1.17 [ 1.13 , 1.21 ]  
 I<sup>2</sup> for heterogeneity : 68%

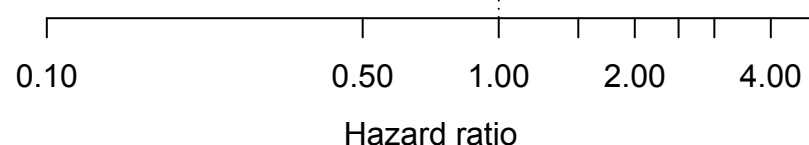



Cohort Name

Weight (%) HR [95% CI]

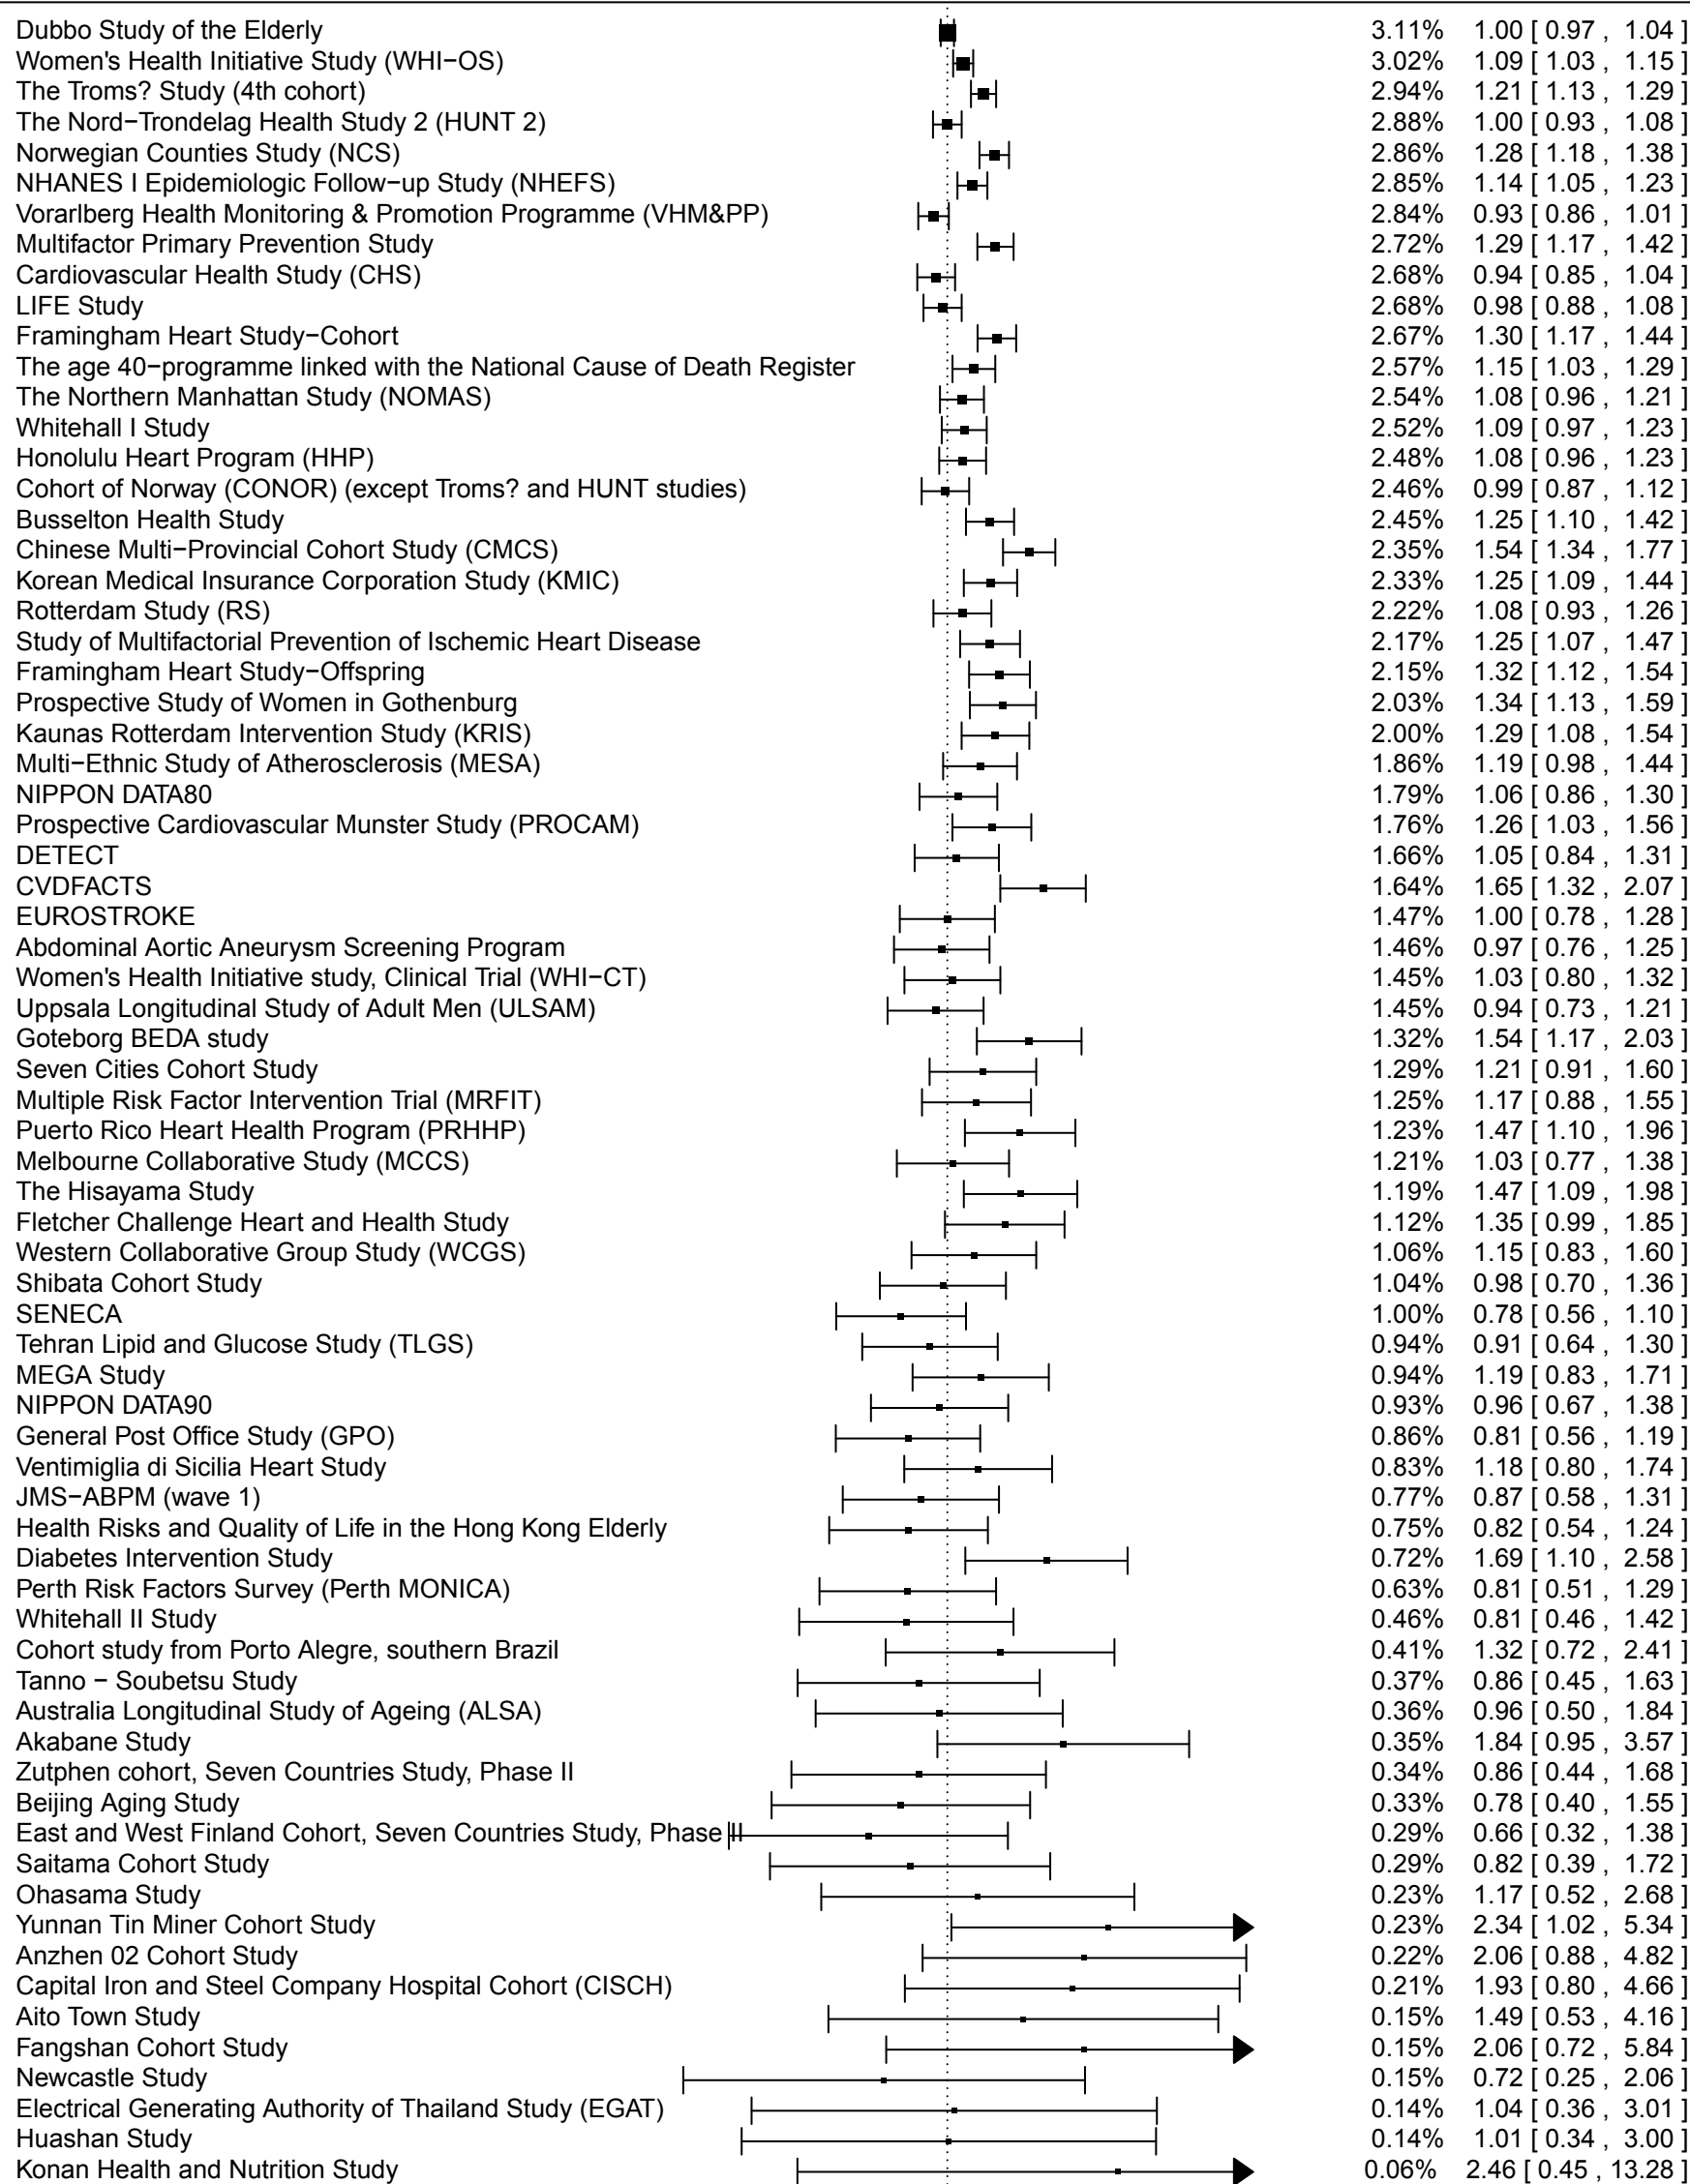

RE Model 100.00% 1.13 [ 1.09 , 1.18 ]  
 I<sup>2</sup> for heterogeneity : 71%

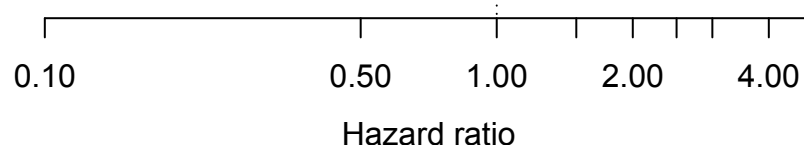

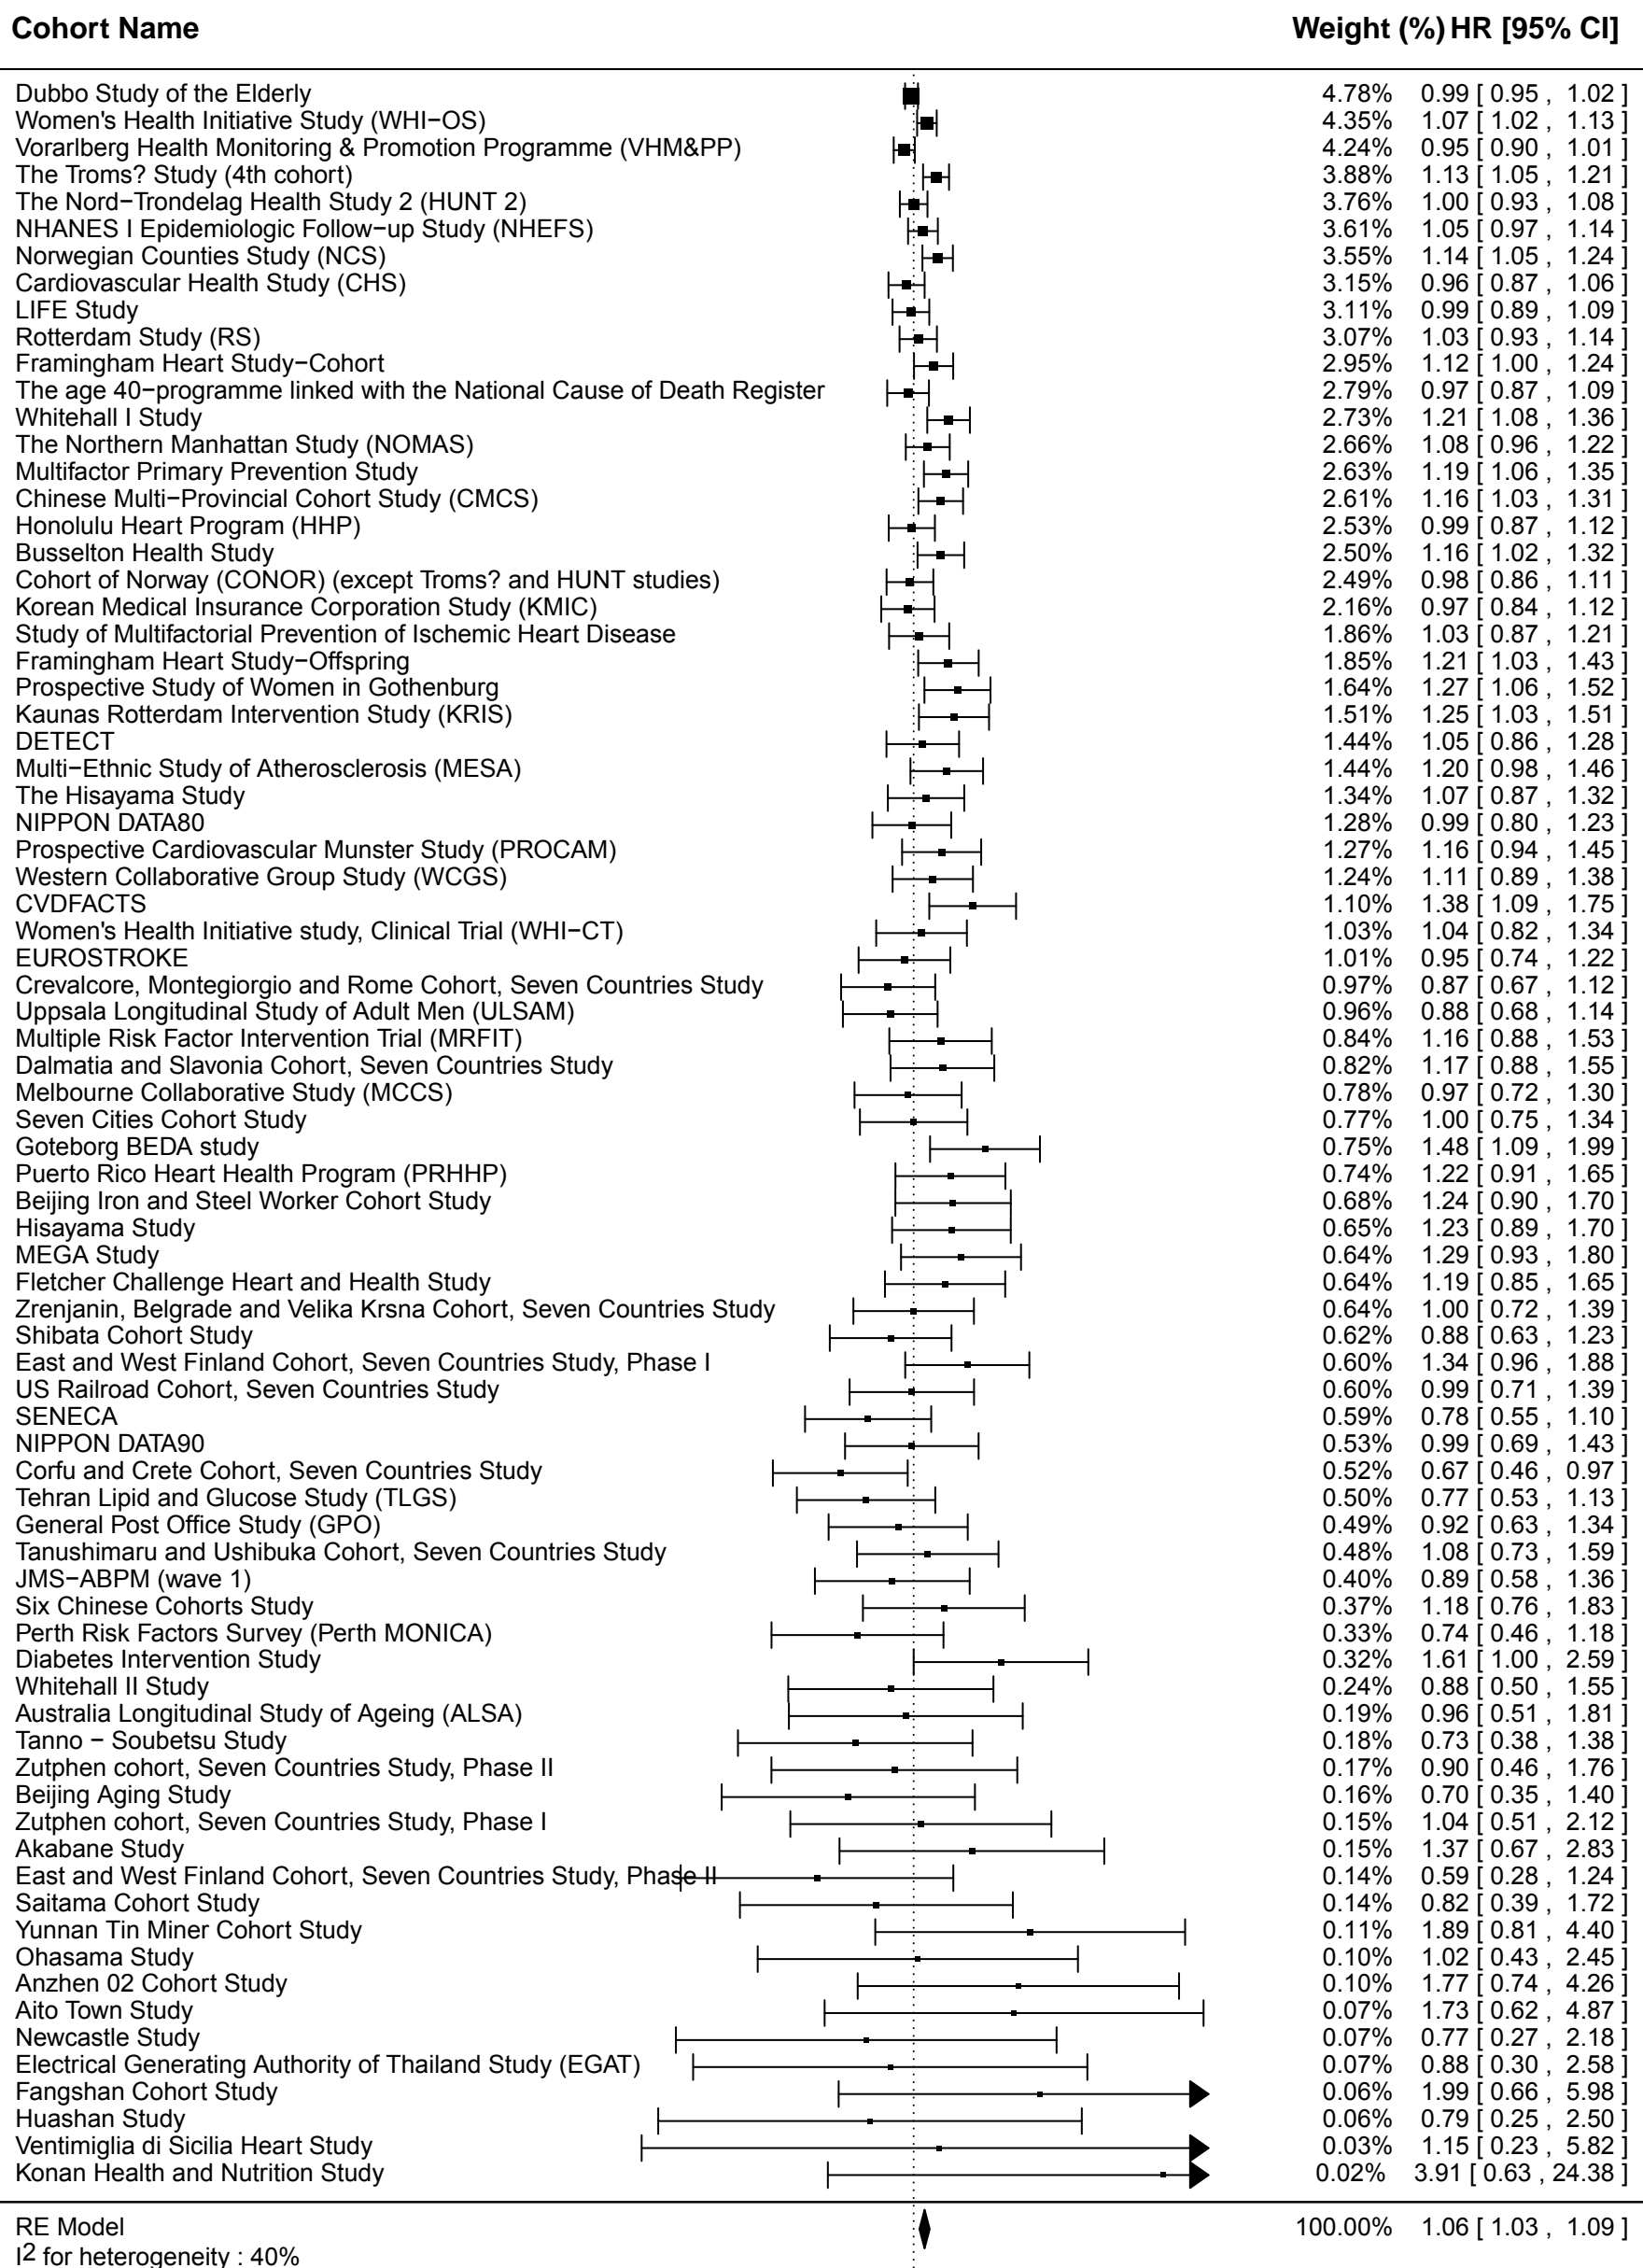

Cohort Name

Weight (%) HR [95% CI]

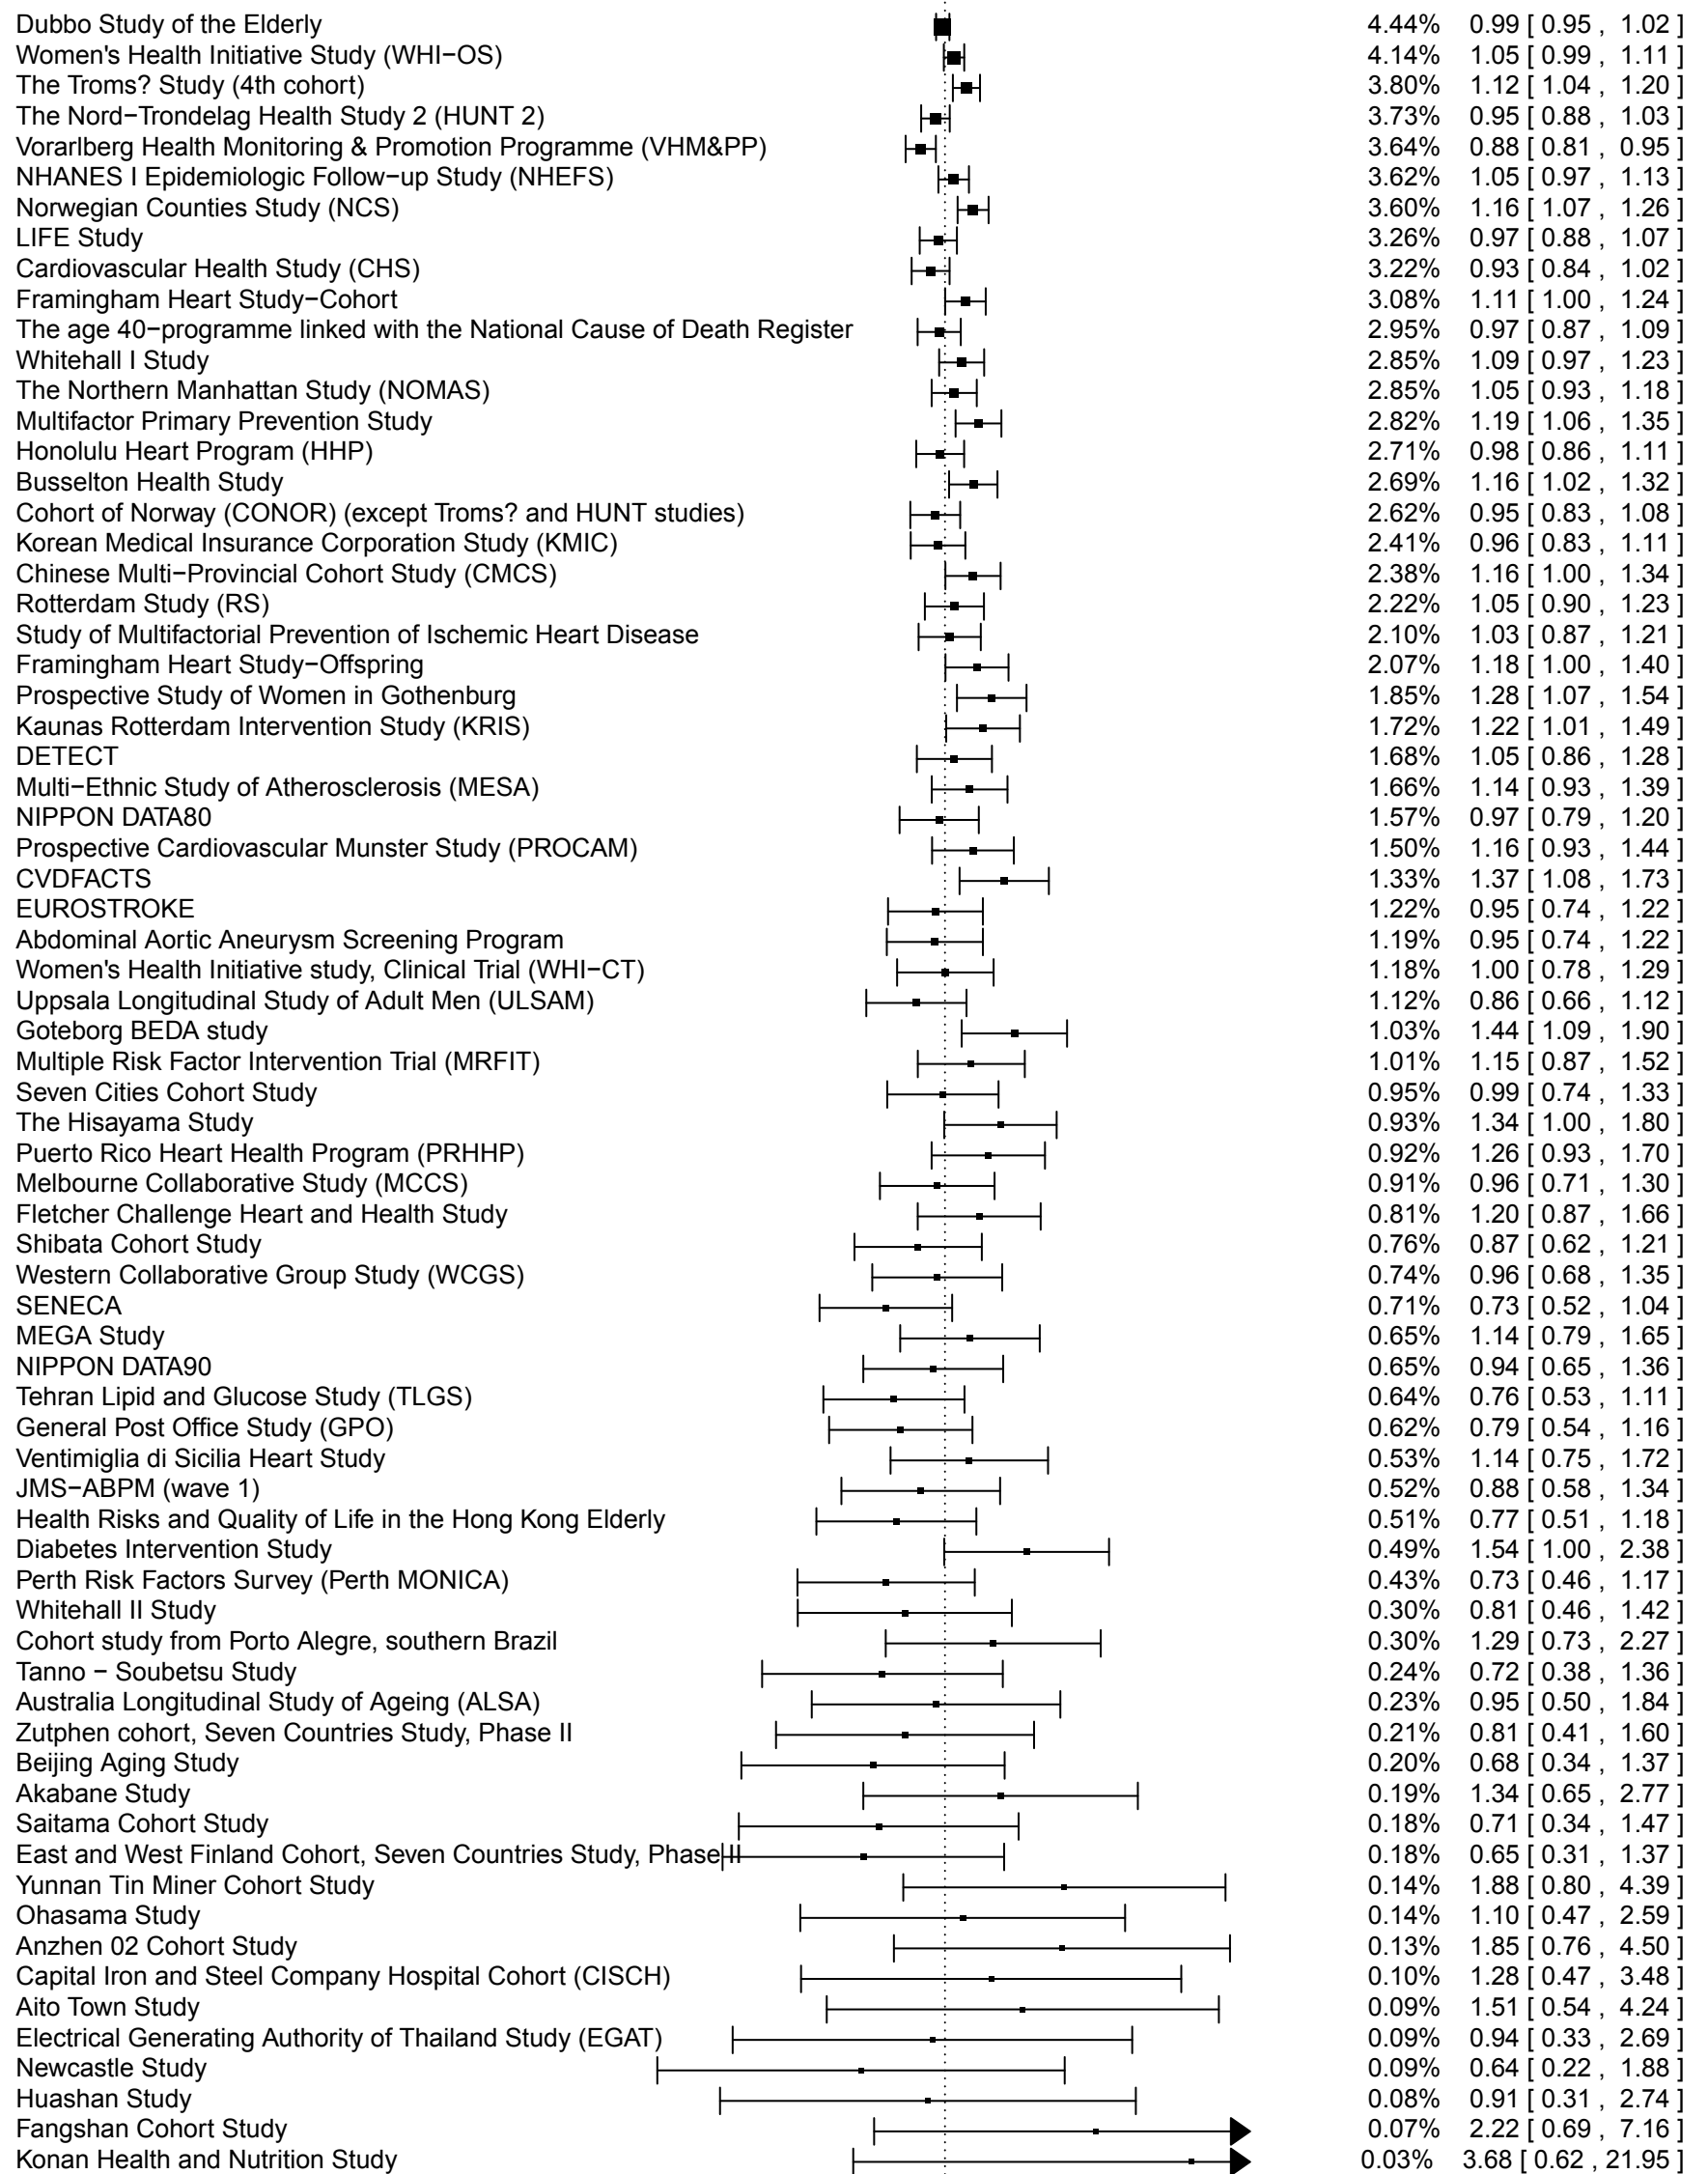

RE Model 100.00% 1.04 [ 1.01 , 1.08 ]  
 I<sup>2</sup> for heterogeneity : 49%

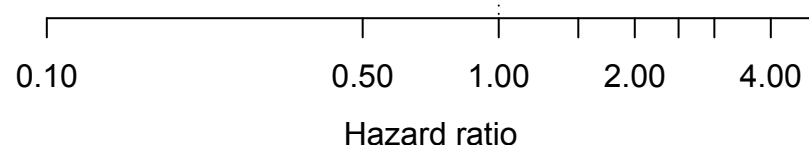

Cohort Name

Weight (%) HR [95% CI]

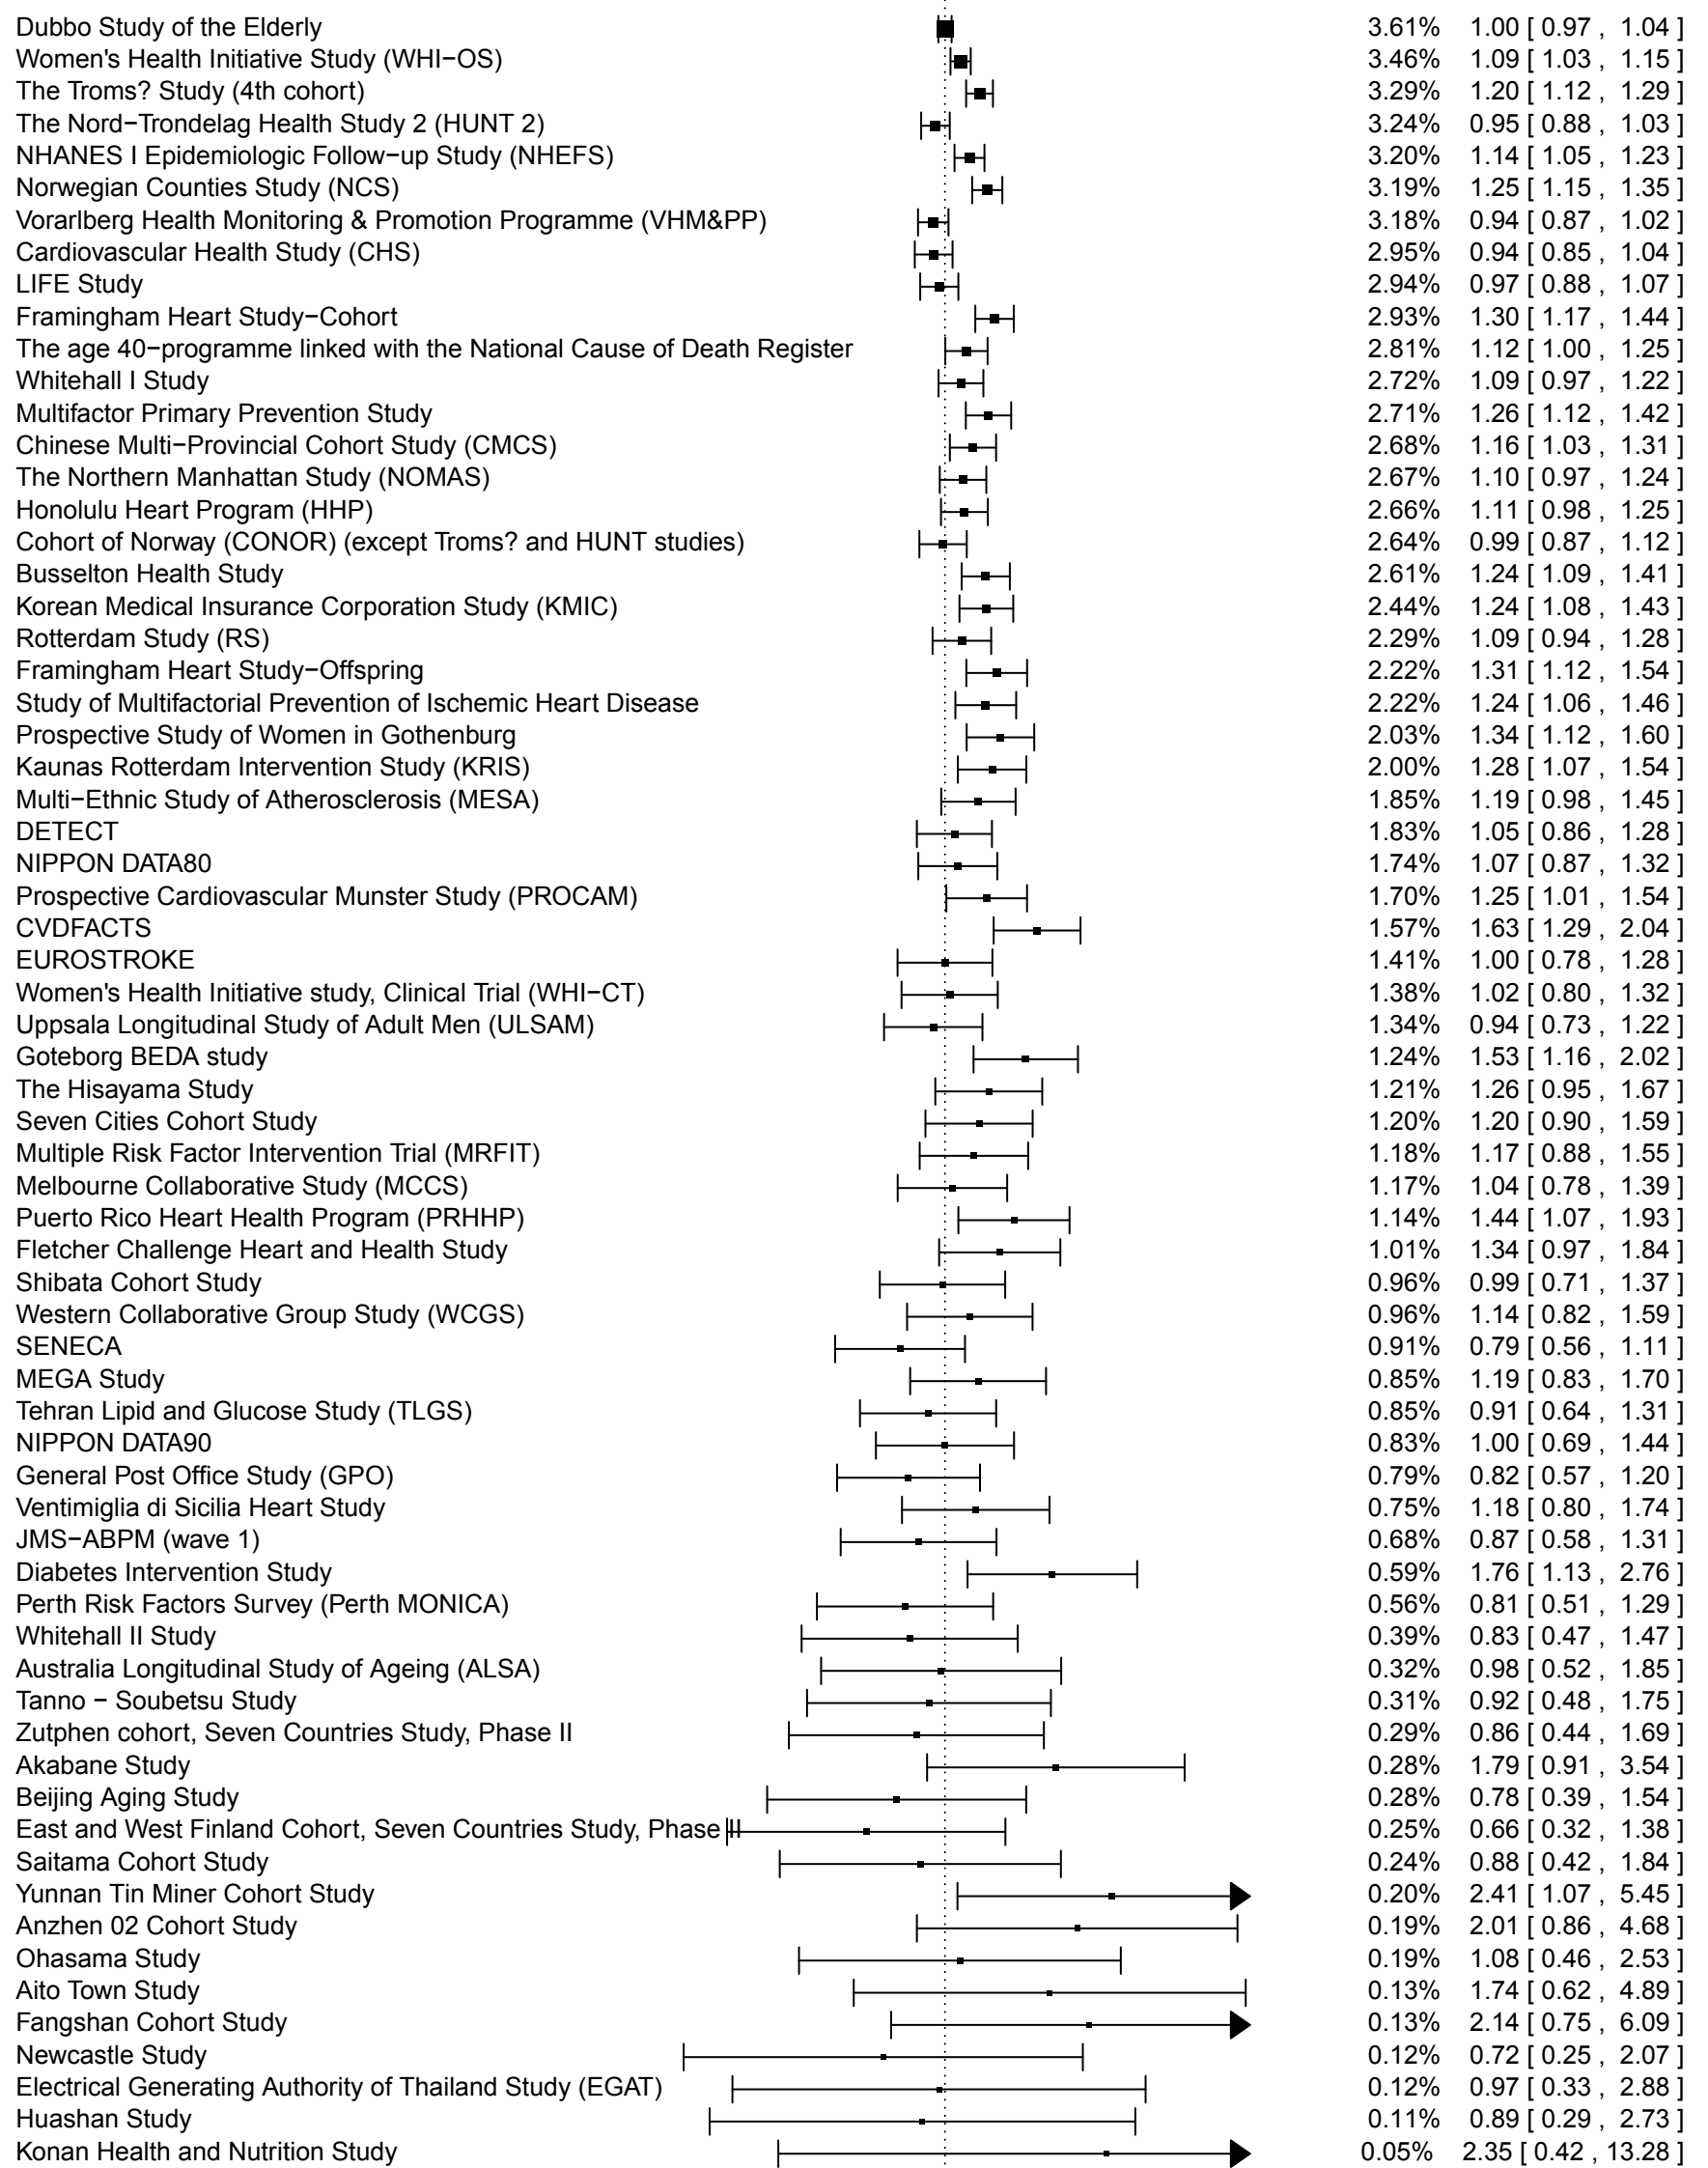

RE Model 100.00% 1.12 [ 1.08 , 1.17 ]  
 I<sup>2</sup> for heterogeneity : 65%

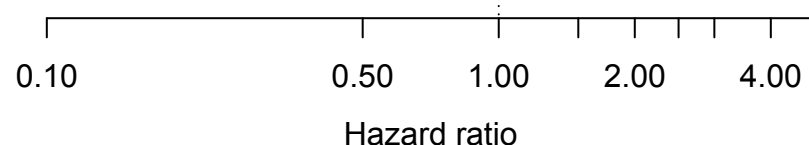

Cohort Name

Weight (%) HR [95% CI]

| Cohort Name                                                           | Weight (%) | HR [95% CI]           |
|-----------------------------------------------------------------------|------------|-----------------------|
| Dubbo Study of the Elderly                                            | 4.93%      | 0.99 [ 0.95 , 1.02 ]  |
| Women's Health Initiative Study (WHI-OS)                              | 4.54%      | 1.05 [ 0.99 , 1.11 ]  |
| The Troms? Study (4th cohort)                                         | 4.20%      | 1.11 [ 1.04 , 1.19 ]  |
| The Nord-Trøndelag Health Study 2 (HUNT 2)                            | 4.00%      | 1.00 [ 0.93 , 1.08 ]  |
| NHANES I Epidemiologic Follow-up Study (NHEFS)                        | 3.84%      | 1.04 [ 0.96 , 1.13 ]  |
| Norwegian Counties Study (NCS)                                        | 3.80%      | 1.14 [ 1.05 , 1.24 ]  |
| Vorarlberg Health Monitoring & Promotion Programme (VHM&PP)           | 3.75%      | 0.88 [ 0.81 , 0.96 ]  |
| Cardiovascular Health Study (CHS)                                     | 3.38%      | 0.93 [ 0.84 , 1.02 ]  |
| LIFE Study                                                            | 3.36%      | 0.97 [ 0.87 , 1.07 ]  |
| Framingham Heart Study-Cohort                                         | 3.21%      | 1.12 [ 1.00 , 1.24 ]  |
| The age 40-programme linked with the National Cause of Death Register | 3.02%      | 0.96 [ 0.86 , 1.08 ]  |
| Whitehall I Study                                                     | 2.94%      | 1.09 [ 0.97 , 1.23 ]  |
| Multifactor Primary Prevention Study                                  | 2.90%      | 1.18 [ 1.04 , 1.33 ]  |
| Chinese Multi-Provincial Cohort Study (CMCS)                          | 2.87%      | 1.16 [ 1.03 , 1.31 ]  |
| The Northern Manhattan Study (NOMAS)                                  | 2.87%      | 1.07 [ 0.95 , 1.21 ]  |
| Honolulu Heart Program (HHP)                                          | 2.78%      | 0.98 [ 0.86 , 1.11 ]  |
| Cohort of Norway (CONOR) (except Troms? and HUNT studies)             | 2.76%      | 0.94 [ 0.83 , 1.07 ]  |
| Busselton Health Study                                                | 2.74%      | 1.15 [ 1.02 , 1.31 ]  |
| Korean Medical Insurance Corporation Study (KMIC)                     | 2.41%      | 0.97 [ 0.84 , 1.12 ]  |
| Rotterdam Study (RS)                                                  | 2.23%      | 1.06 [ 0.91 , 1.24 ]  |
| Study of Multifactorial Prevention of Ischemic Heart Disease          | 2.09%      | 1.02 [ 0.87 , 1.20 ]  |
| Framingham Heart Study-Offspring                                      | 2.05%      | 1.18 [ 1.00 , 1.40 ]  |
| Prospective Study of Women in Gothenburg                              | 1.82%      | 1.27 [ 1.06 , 1.53 ]  |
| Kaunas Rotterdam Intervention Study (KRIS)                            | 1.68%      | 1.22 [ 1.01 , 1.49 ]  |
| Multi-Ethnic Study of Atherosclerosis (MESA)                          | 1.60%      | 1.14 [ 0.93 , 1.40 ]  |
| NIPPON DATA80                                                         | 1.44%      | 0.98 [ 0.79 , 1.22 ]  |
| Prospective Cardiovascular Munster Study (PROCAM)                     | 1.43%      | 1.15 [ 0.92 , 1.43 ]  |
| The Hisayama Study                                                    | 1.39%      | 1.11 [ 0.89 , 1.39 ]  |
| DETECT                                                                | 1.38%      | 1.00 [ 0.80 , 1.25 ]  |
| CVDFACTS                                                              | 1.24%      | 1.36 [ 1.07 , 1.73 ]  |
| EUROSTROKE                                                            | 1.16%      | 0.95 [ 0.74 , 1.22 ]  |
| Women's Health Initiative study, Clinical Trial (WHI-CT)              | 1.13%      | 1.00 [ 0.77 , 1.29 ]  |
| Uppsala Longitudinal Study of Adult Men (ULSAM)                       | 1.10%      | 0.86 [ 0.66 , 1.12 ]  |
| Goteborg BEDA study                                                   | 0.98%      | 1.45 [ 1.10 , 1.91 ]  |
| Multiple Risk Factor Intervention Trial (MRFIT)                       | 0.96%      | 1.15 [ 0.87 , 1.52 ]  |
| Seven Cities Cohort Study                                             | 0.90%      | 0.99 [ 0.73 , 1.32 ]  |
| Melbourne Collaborative Study (MCCS)                                  | 0.89%      | 0.97 [ 0.72 , 1.30 ]  |
| Puerto Rico Heart Health Program (PRHHP)                              | 0.86%      | 1.24 [ 0.92 , 1.67 ]  |
| Fletcher Challenge Heart and Health Study                             | 0.74%      | 1.17 [ 0.84 , 1.63 ]  |
| Shibata Cohort Study                                                  | 0.72%      | 0.87 [ 0.62 , 1.22 ]  |
| Western Collaborative Group Study (WCGS)                              | 0.69%      | 0.96 [ 0.68 , 1.35 ]  |
| SENECA                                                                | 0.66%      | 0.74 [ 0.52 , 1.05 ]  |
| NIPPON DATA90                                                         | 0.62%      | 0.98 [ 0.68 , 1.41 ]  |
| MEGA Study                                                            | 0.61%      | 1.14 [ 0.79 , 1.65 ]  |
| General Post Office Study (GPO)                                       | 0.59%      | 0.80 [ 0.55 , 1.17 ]  |
| Tehran Lipid and Glucose Study (TLGS)                                 | 0.59%      | 0.77 [ 0.53 , 1.12 ]  |
| Ventimiglia di Sicilia Heart Study                                    | 0.49%      | 1.14 [ 0.75 , 1.72 ]  |
| JMS-ABPM (wave 1)                                                     | 0.47%      | 0.88 [ 0.57 , 1.35 ]  |
| Diabetes Intervention Study                                           | 0.41%      | 1.54 [ 0.98 , 2.43 ]  |
| Perth Risk Factors Survey (Perth MONICA)                              | 0.40%      | 0.73 [ 0.46 , 1.17 ]  |
| Whitehall II Study                                                    | 0.27%      | 0.83 [ 0.47 , 1.47 ]  |
| Australia Longitudinal Study of Ageing (ALSA)                         | 0.22%      | 0.96 [ 0.51 , 1.81 ]  |
| Tanno - Soubetsu Study                                                | 0.22%      | 0.76 [ 0.40 , 1.44 ]  |
| Zutphen cohort, Seven Countries Study, Phase II                       | 0.20%      | 0.82 [ 0.42 , 1.61 ]  |
| Beijing Aging Study                                                   | 0.19%      | 0.68 [ 0.34 , 1.36 ]  |
| Akabane Study                                                         | 0.17%      | 1.32 [ 0.63 , 2.77 ]  |
| Saitama Cohort Study                                                  | 0.16%      | 0.76 [ 0.36 , 1.59 ]  |
| East and West Finland Cohort, Seven Countries Study, Phase II         | 0.16%      | 0.65 [ 0.31 , 1.37 ]  |
| Yunnan Tin Miner Cohort Study                                         | 0.13%      | 1.89 [ 0.81 , 4.40 ]  |
| Ohasama Study                                                         | 0.12%      | 1.03 [ 0.43 , 2.46 ]  |
| Anzhen 02 Cohort Study                                                | 0.12%      | 1.77 [ 0.74 , 4.26 ]  |
| Aito Town Study                                                       | 0.09%      | 1.75 [ 0.62 , 4.96 ]  |
| Newcastle Study                                                       | 0.08%      | 0.64 [ 0.22 , 1.88 ]  |
| Electrical Generating Authority of Thailand Study (EGAT)              | 0.08%      | 0.88 [ 0.30 , 2.58 ]  |
| Huashan Study                                                         | 0.07%      | 0.80 [ 0.25 , 2.55 ]  |
| Fangshan Cohort Study                                                 | 0.07%      | 2.33 [ 0.71 , 7.58 ]  |
| Konan Health and Nutrition Study                                      | 0.03%      | 3.93 [ 0.65 , 23.85 ] |

RE Model 100.00% 1.04 [ 1.01 , 1.08 ]  
 I<sup>2</sup> for heterogeneity : 45%

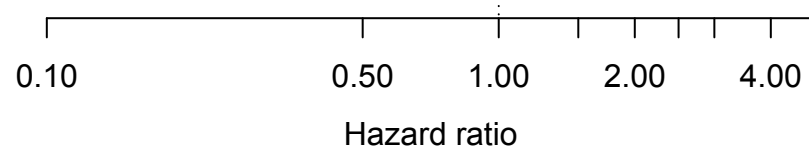

**Figure 4:** Cohort-specific hazard ratios (HRs) of CHD for overweight vs. normal weight.  
(Some cohorts that had BMI continuously did not have sufficient events in this BMI range for categorical analysis.)

Cohort Name

Weight (%) HR [95% CI]

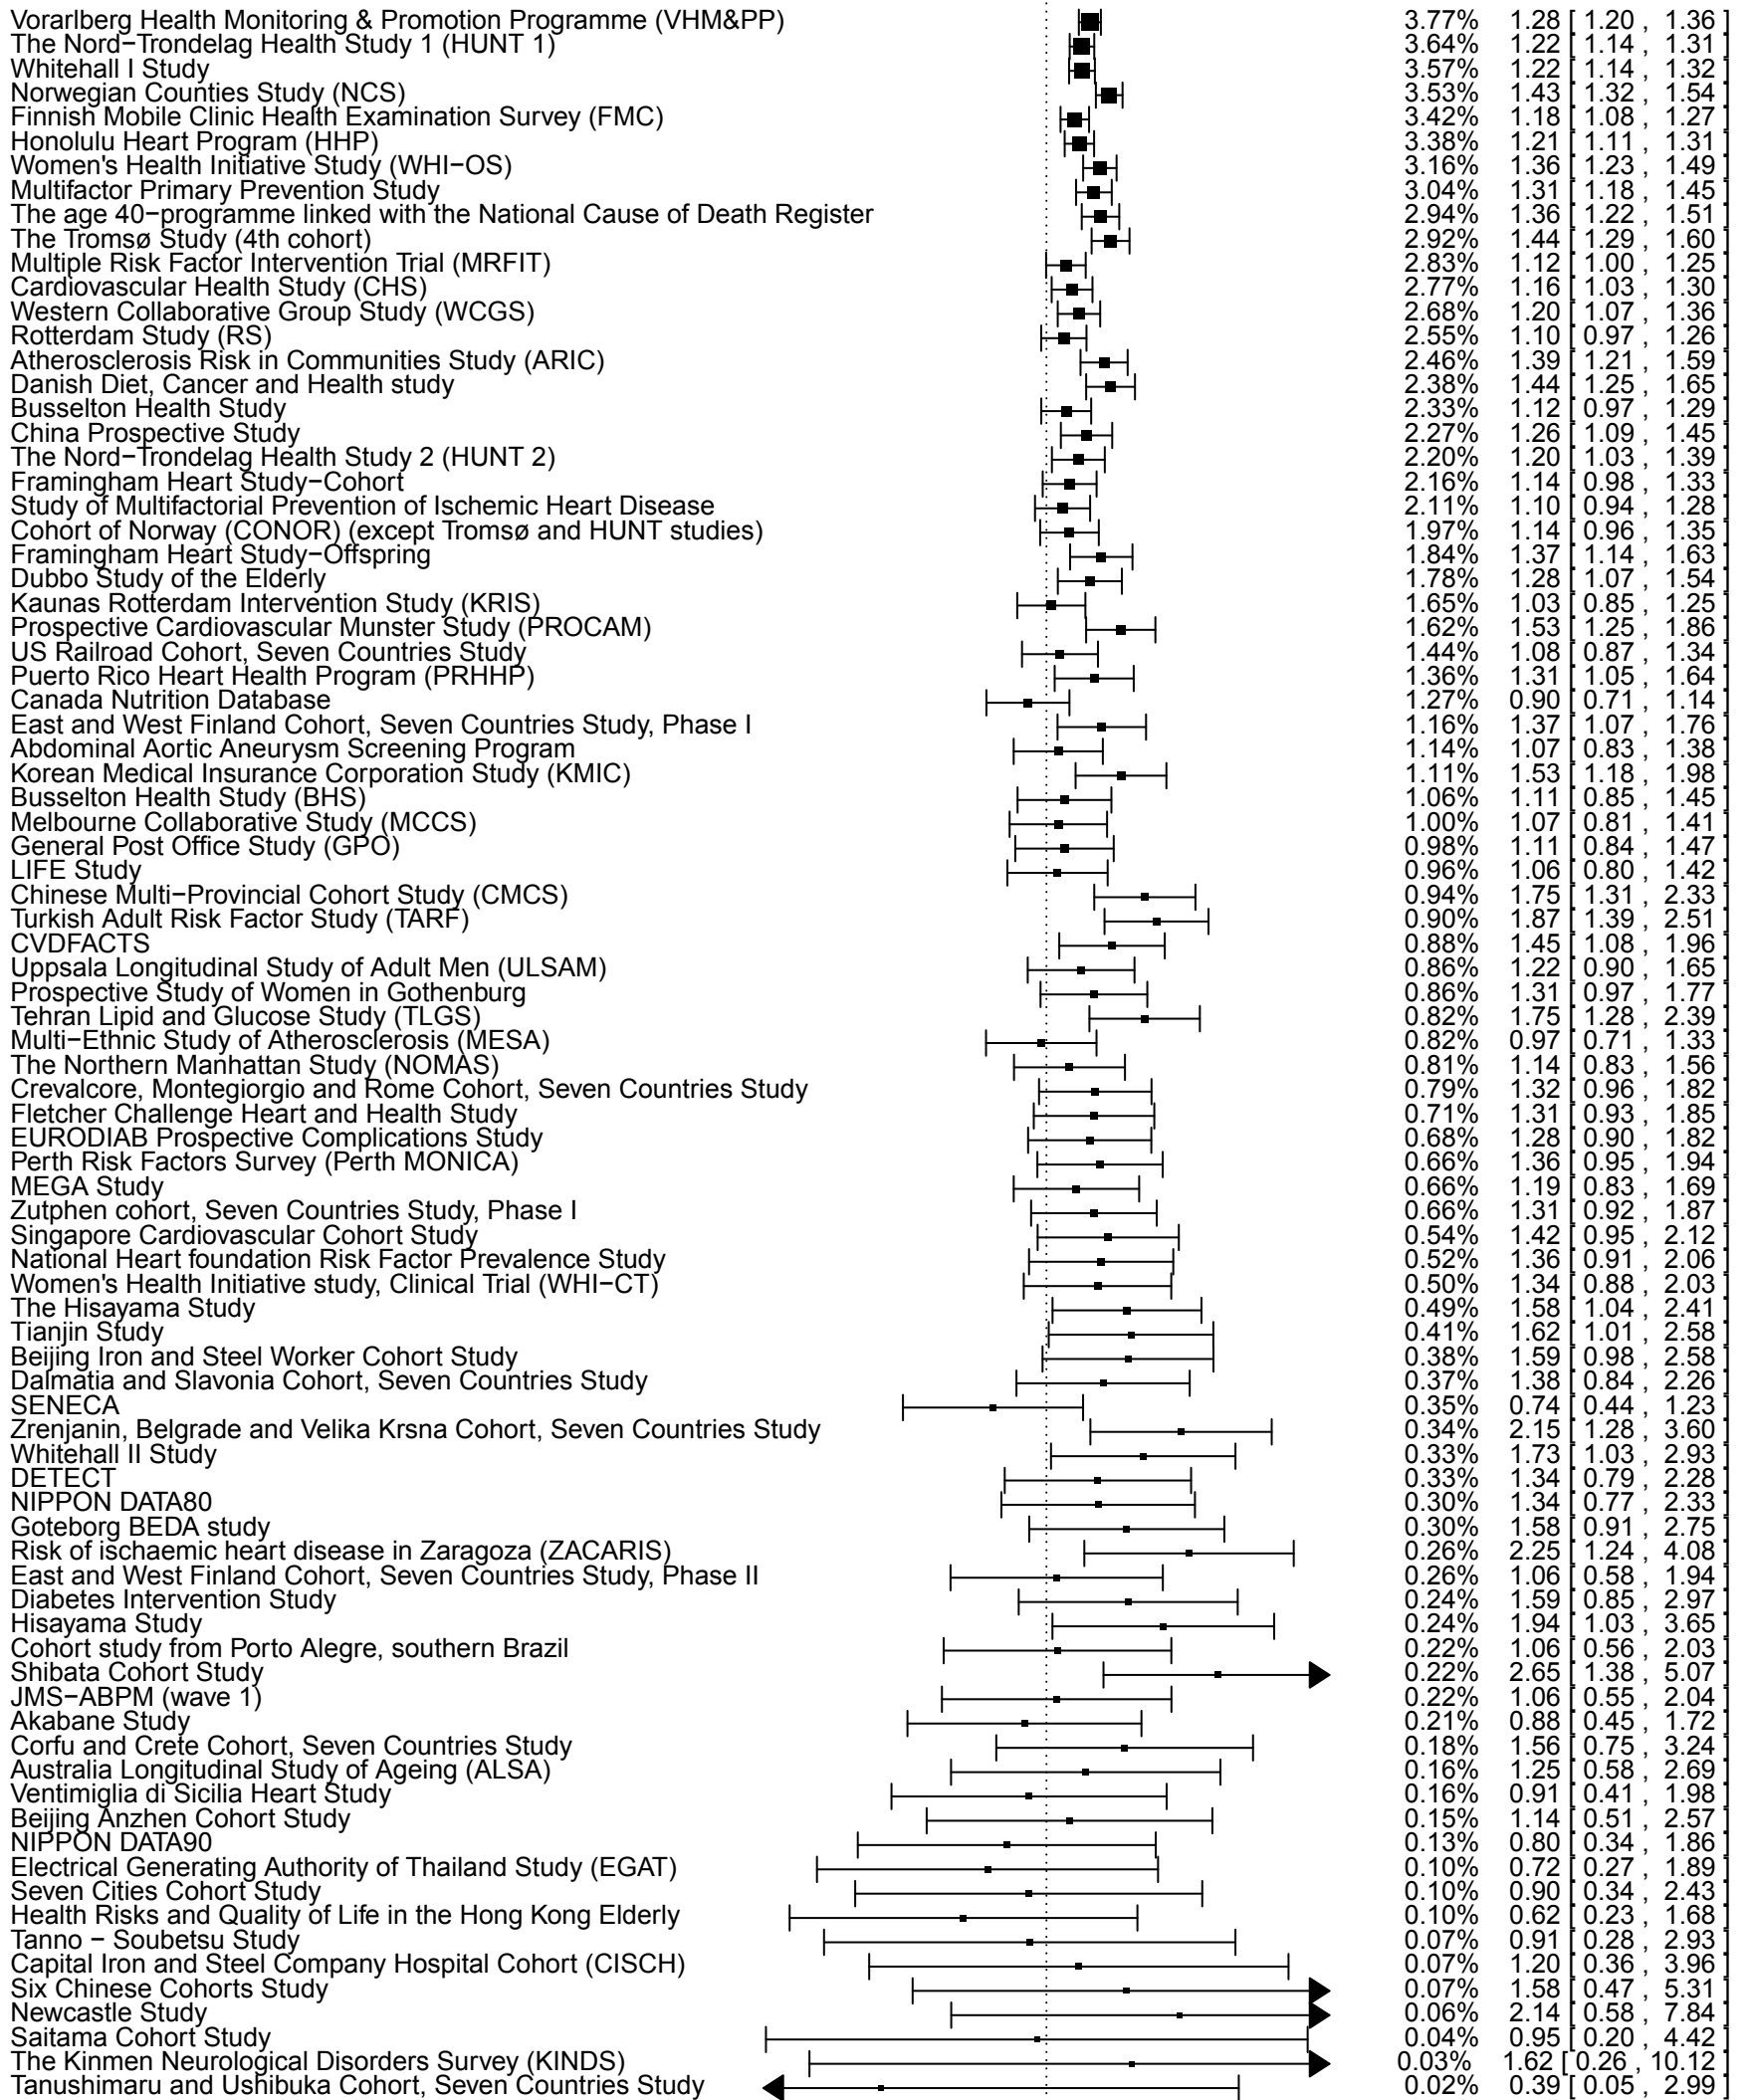

RE Model 100.00% 1.26 [ 1.22 , 1.30 ]

I<sup>2</sup> for heterogeneity : 40%

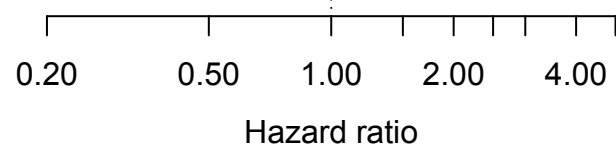

Cohort Name

Weight (%) HR [95% CI]

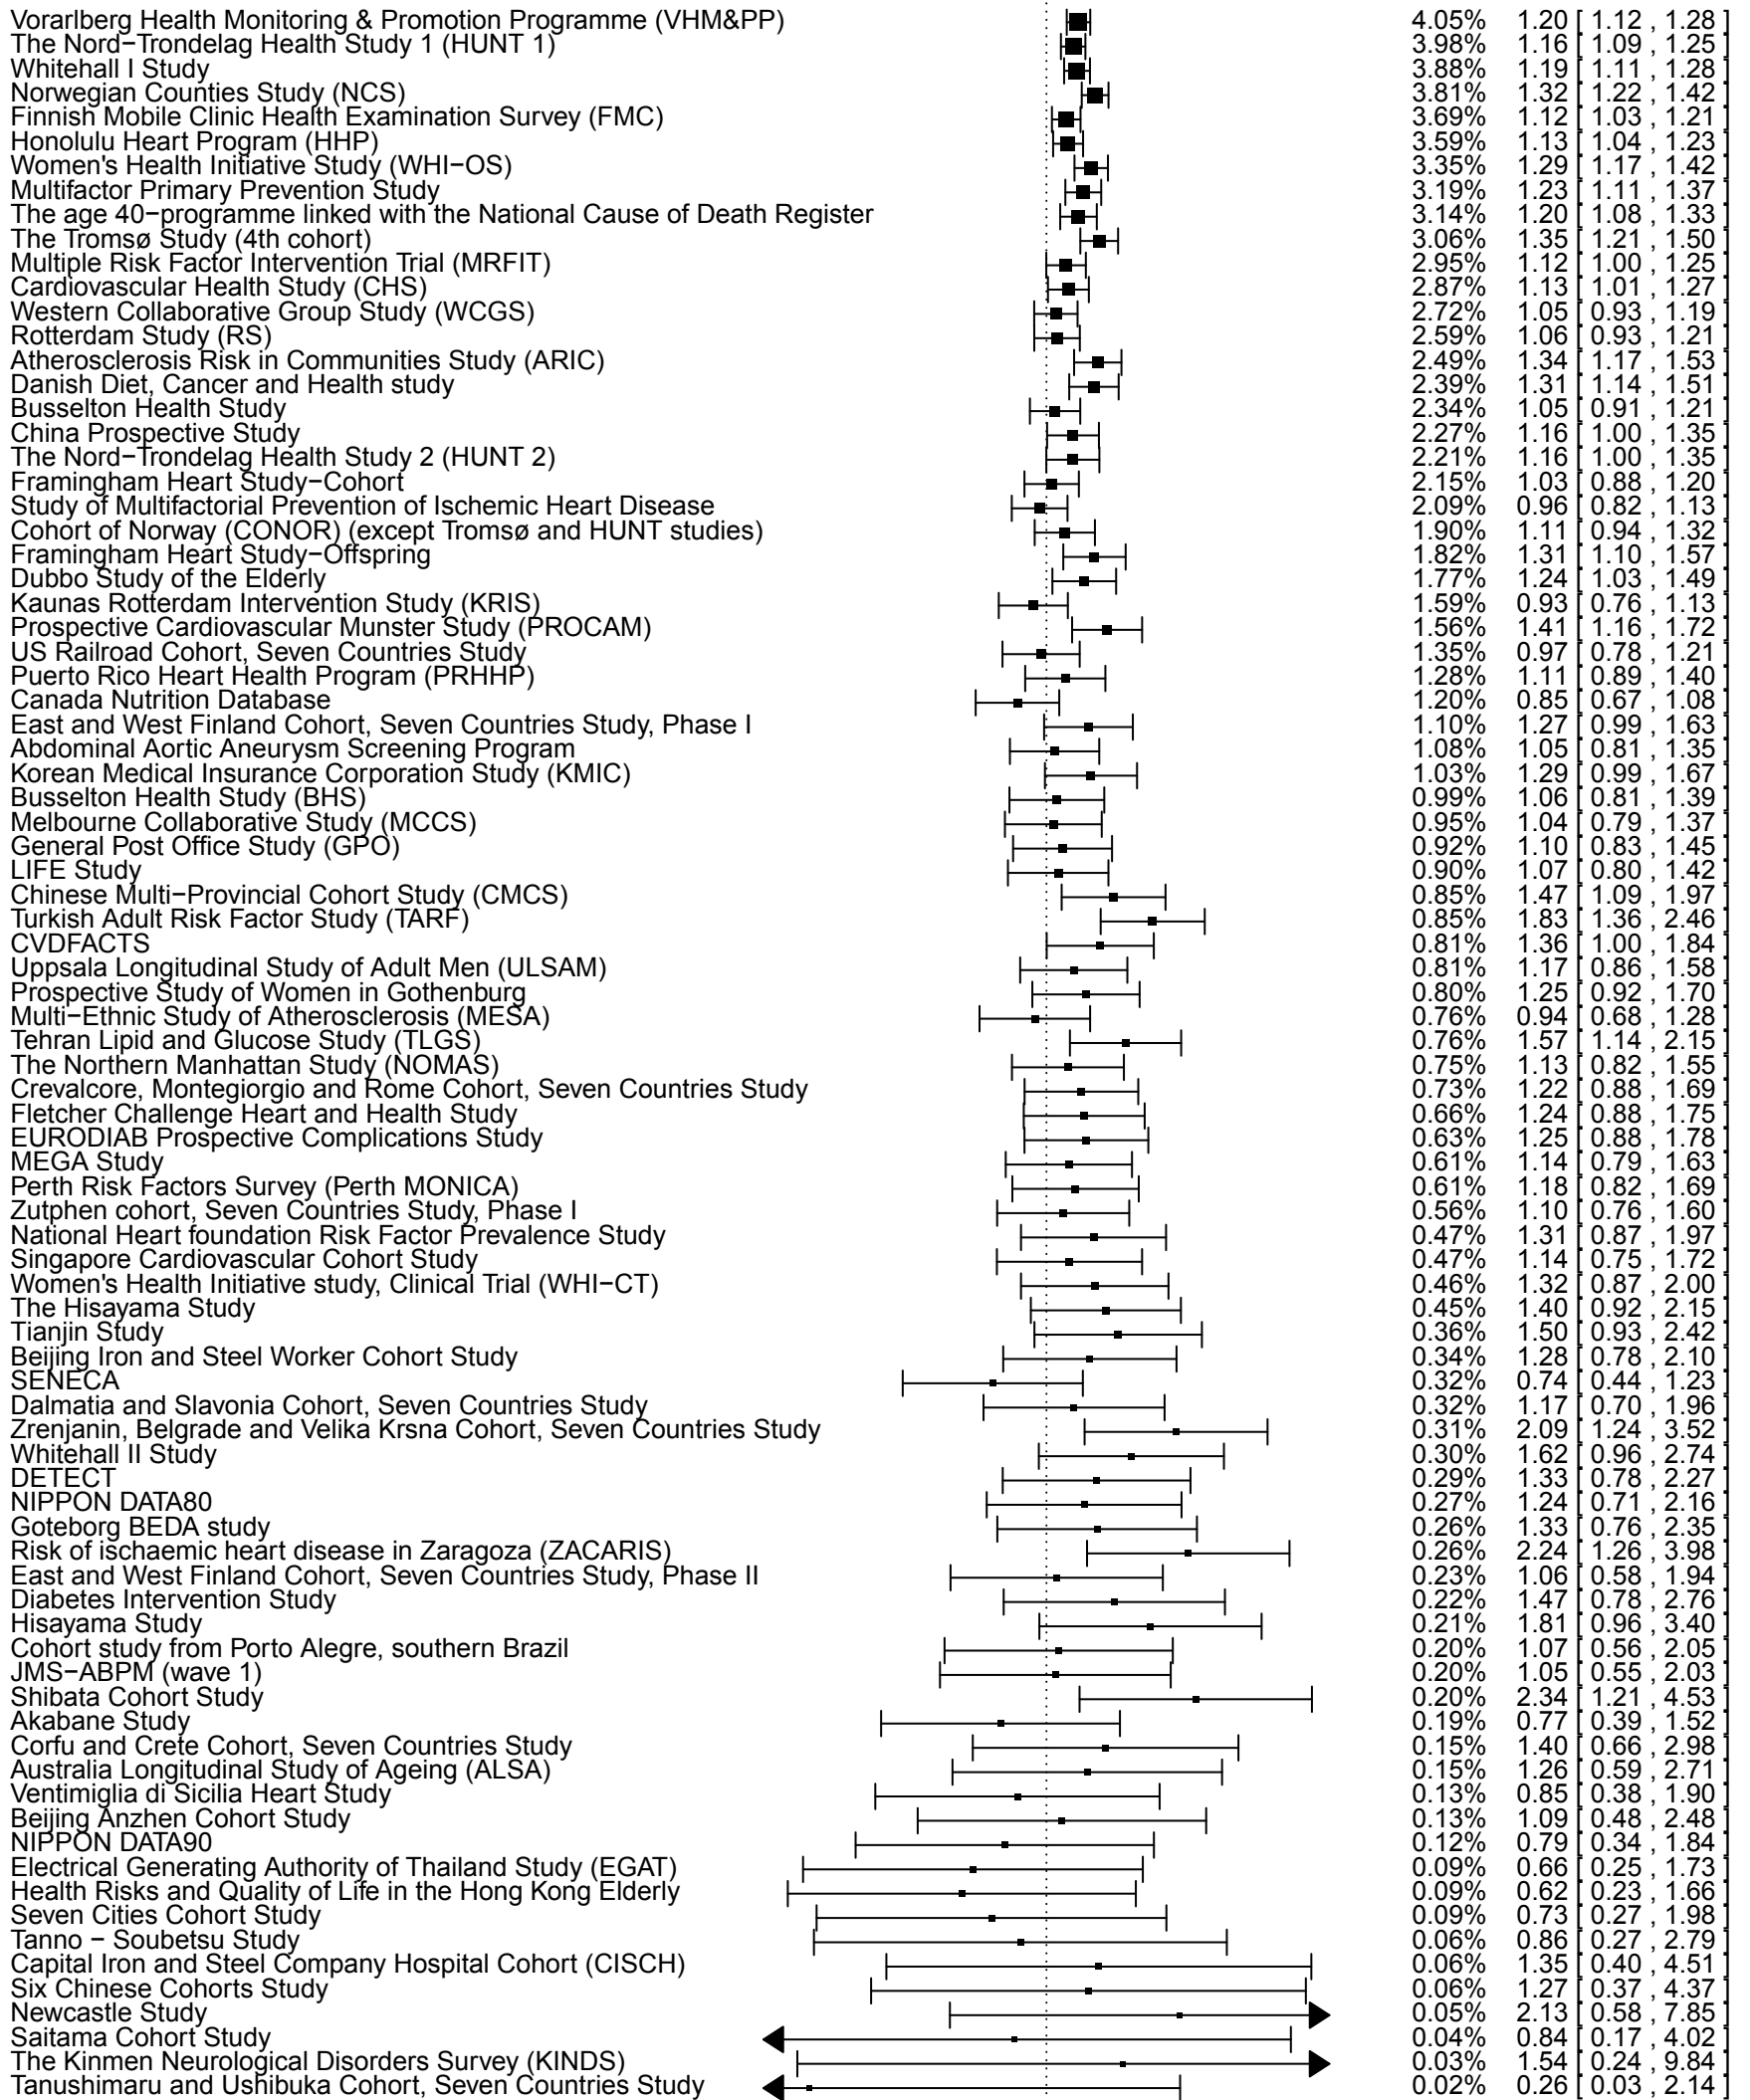

RE Model 100.00% 1.18 [1.14, 1.22]  
 I<sup>2</sup> for heterogeneity : 34%

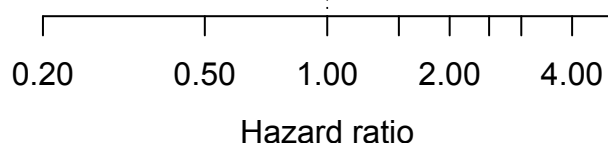



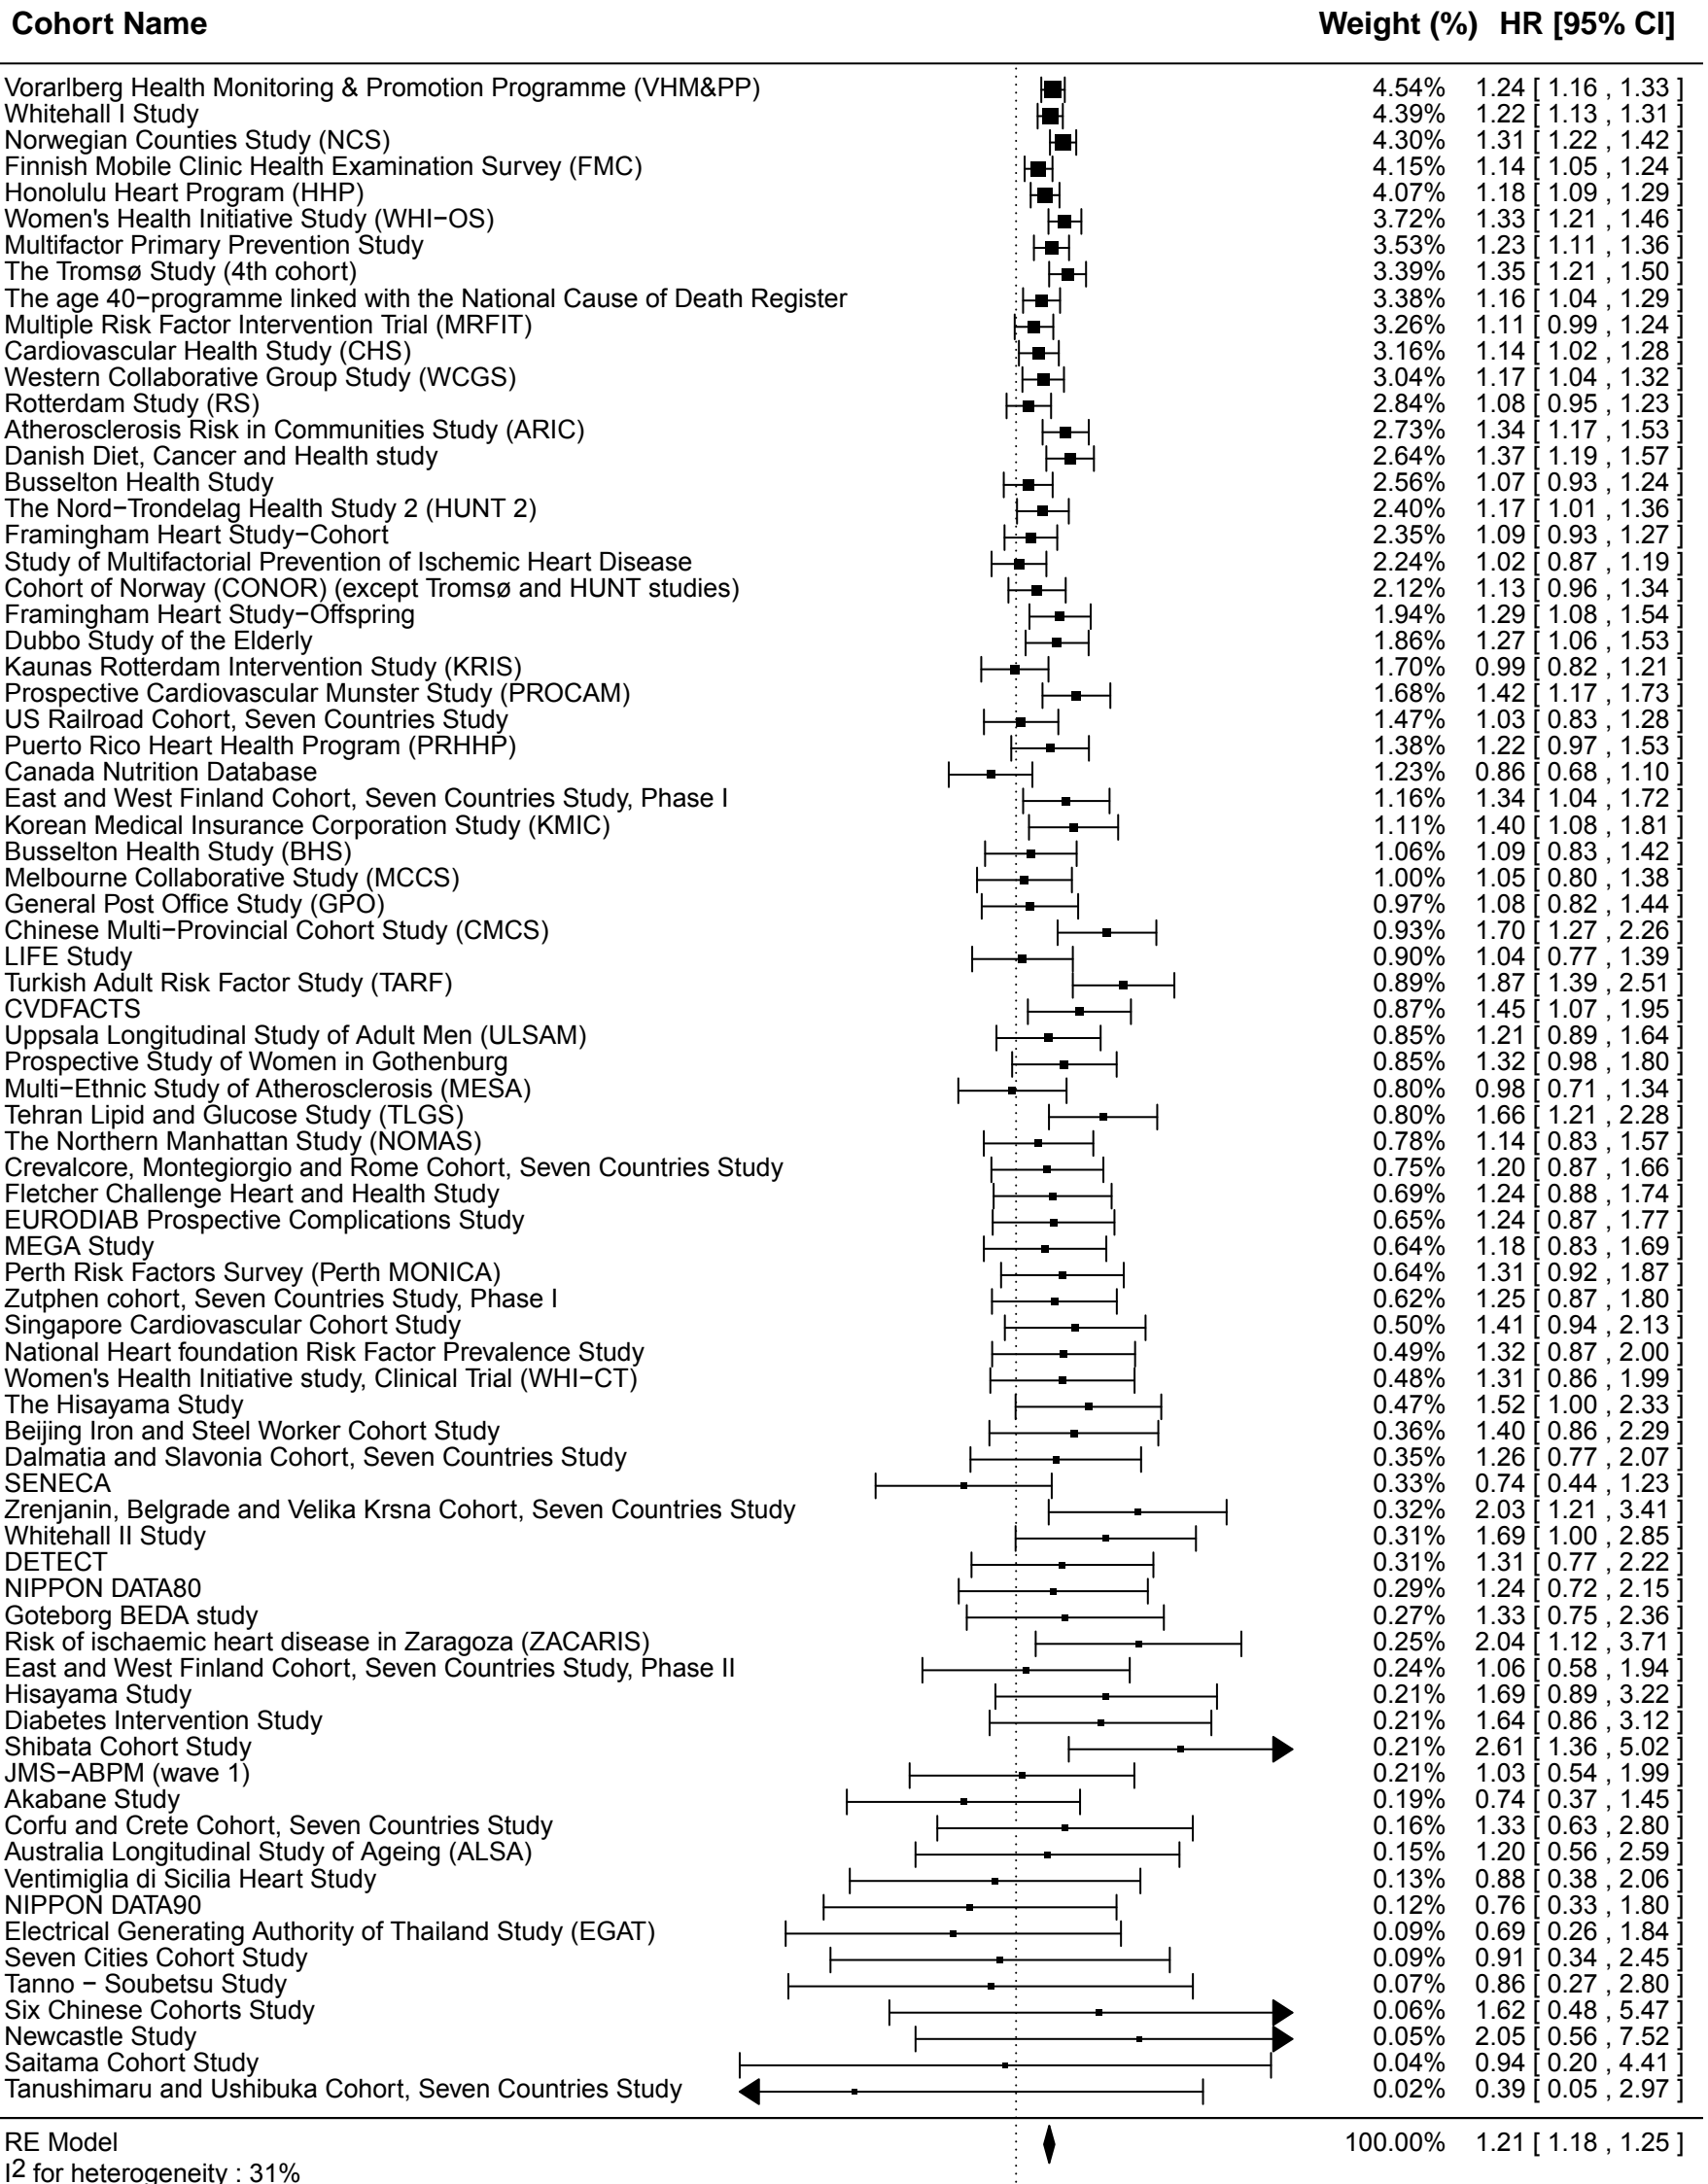

Cohort Name

Weight (%) HR [95% CI]

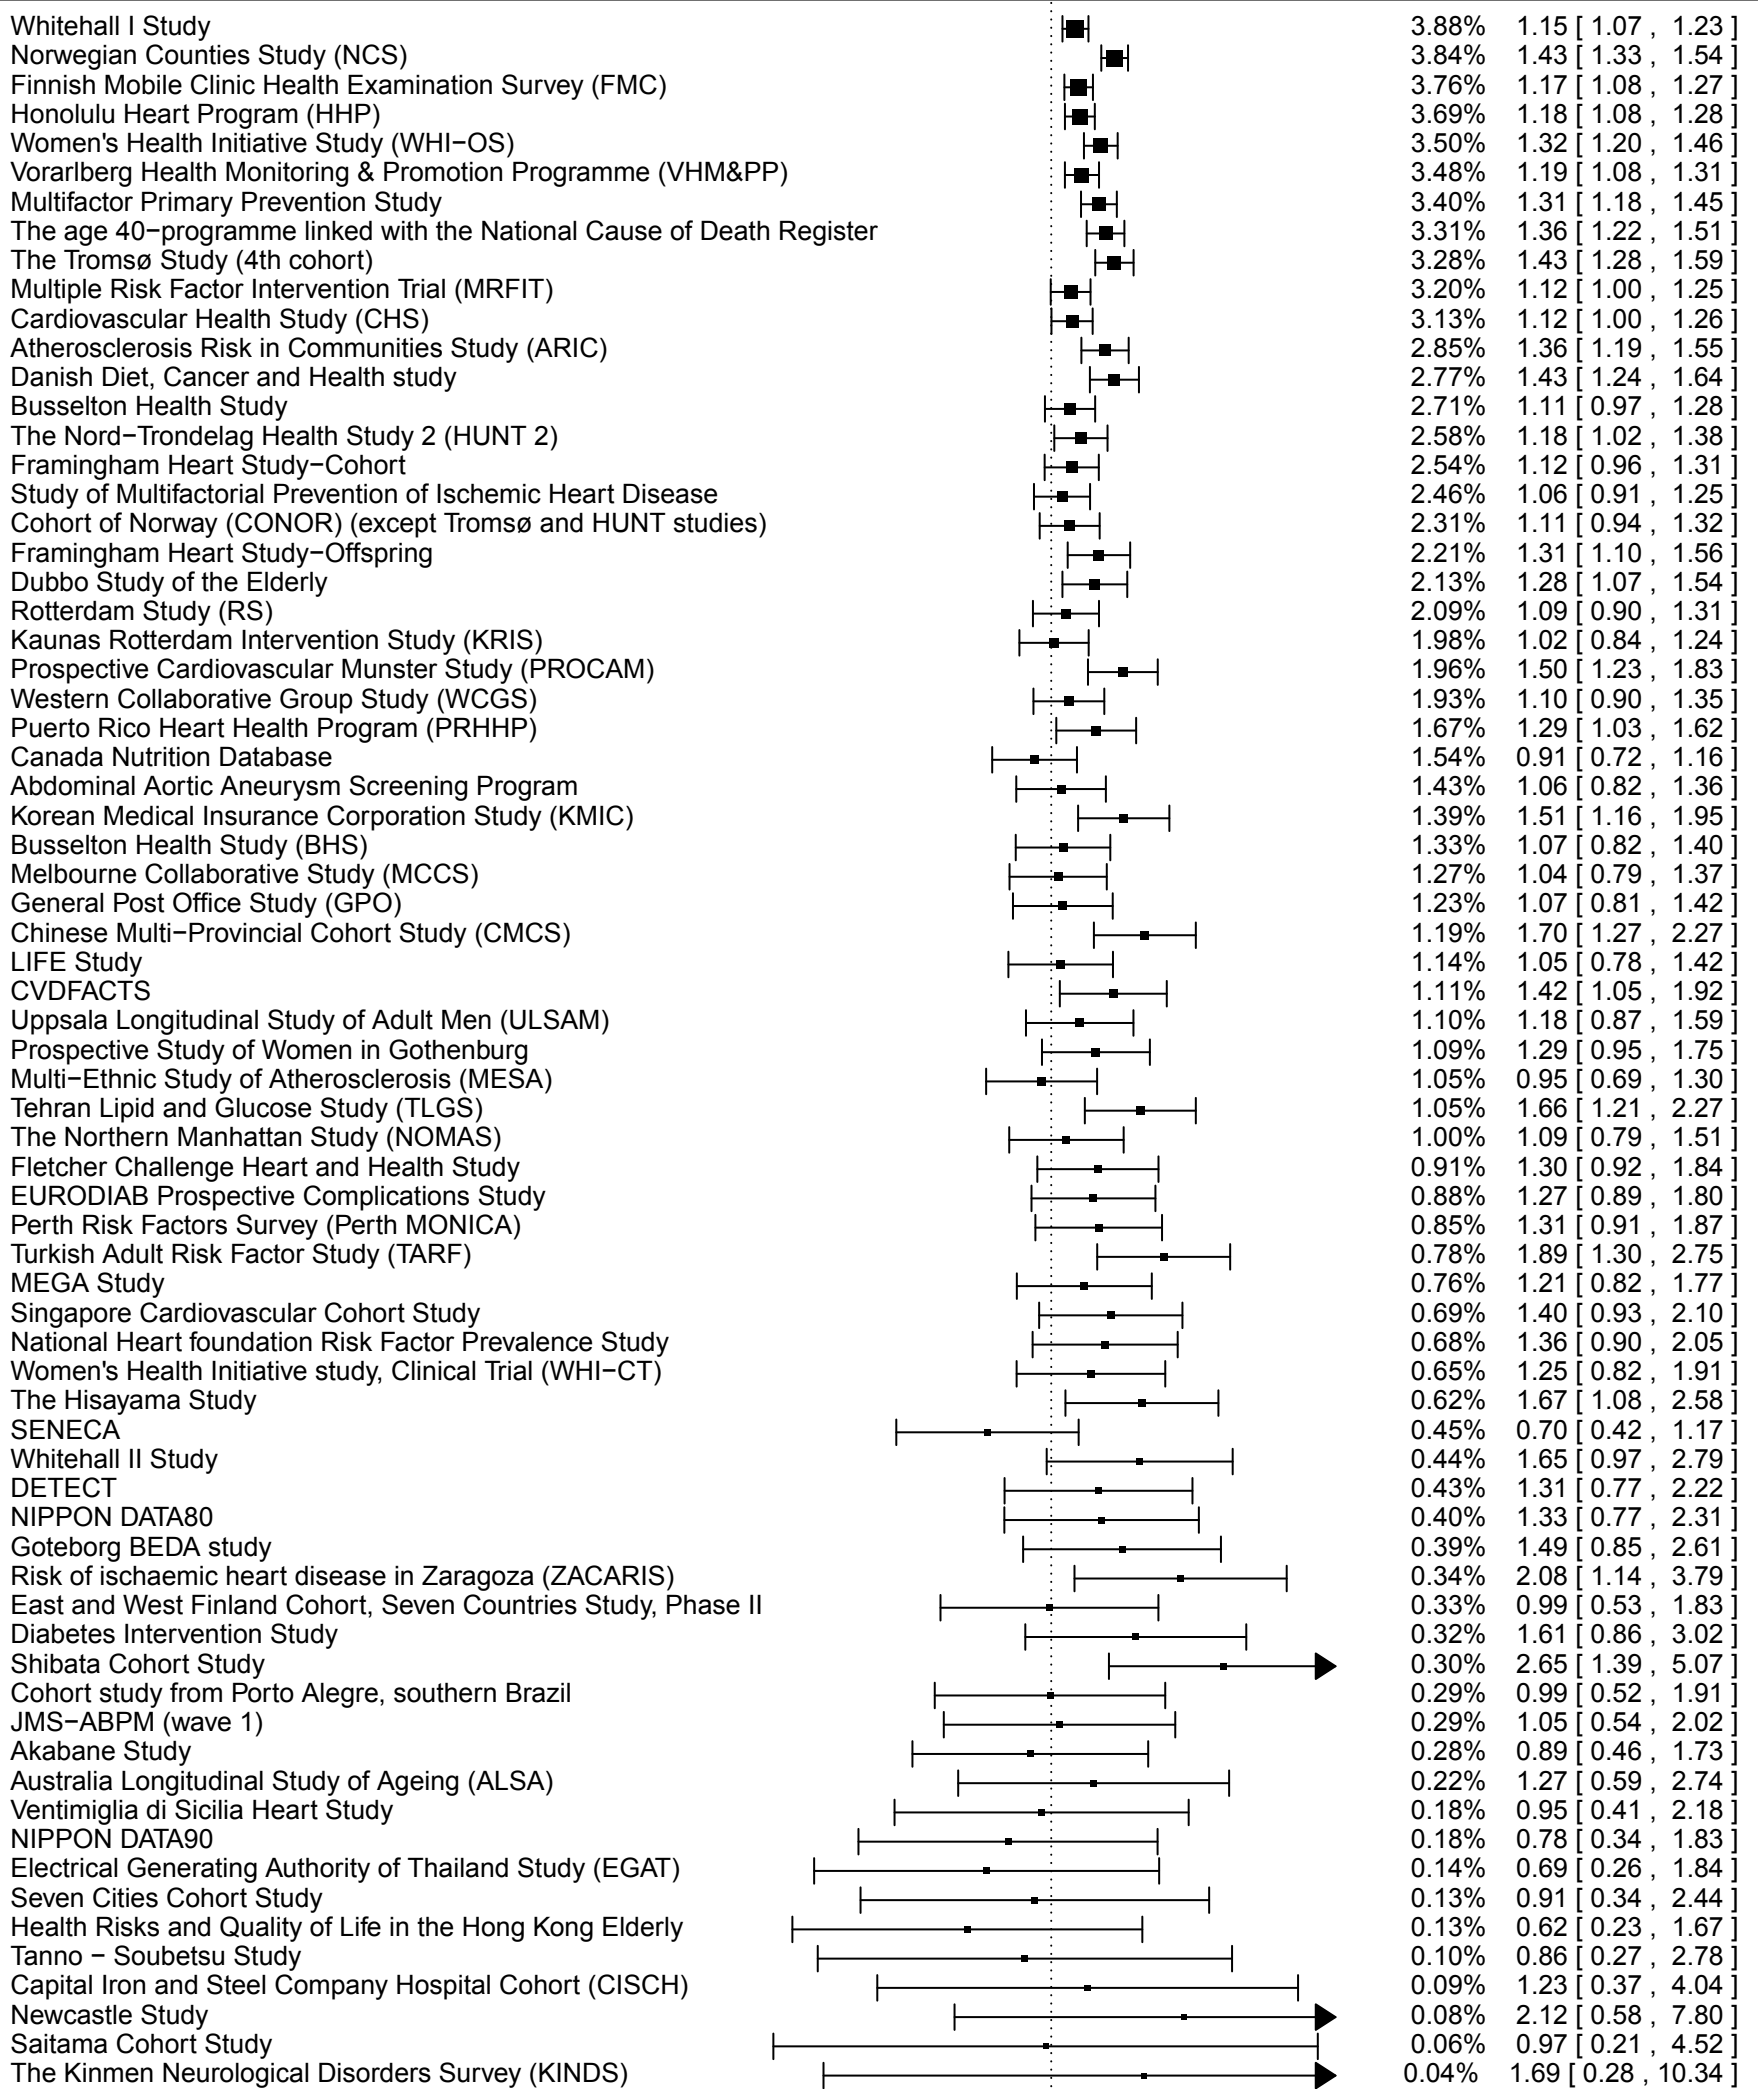

RE Model 100.00% 1.23 [ 1.18 , 1.27 ]  
 I<sup>2</sup> for heterogeneity : 45%

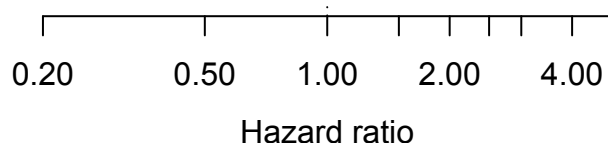

Cohort Name

Weight (%) HR [95% CI]

| Cohort Name                                                           | Weight (%) | HR [95% CI]          |
|-----------------------------------------------------------------------|------------|----------------------|
| Vorarlberg Health Monitoring & Promotion Programme (VHM&PP)           | 4.76%      | 1.17 [ 1.10 , 1.25 ] |
| Whitehall I Study                                                     | 4.46%      | 1.19 [ 1.10 , 1.28 ] |
| Norwegian Counties Study (NCS)                                        | 4.36%      | 1.23 [ 1.14 , 1.33 ] |
| Finnish Mobile Clinic Health Examination Survey (FMC)                 | 4.22%      | 1.09 [ 1.01 , 1.18 ] |
| Honolulu Heart Program (HHP)                                          | 4.09%      | 1.12 [ 1.03 , 1.22 ] |
| Women's Health Initiative Study (WHI-OS)                              | 3.77%      | 1.27 [ 1.15 , 1.40 ] |
| Multifactor Primary Prevention Study                                  | 3.56%      | 1.17 [ 1.06 , 1.30 ] |
| The Tromsø Study (4th cohort)                                         | 3.48%      | 1.28 [ 1.15 , 1.42 ] |
| The age 40-programme linked with the National Cause of Death Register | 3.37%      | 1.05 [ 0.94 , 1.17 ] |
| Multiple Risk Factor Intervention Trial (MRFIT)                       | 3.30%      | 1.11 [ 0.99 , 1.24 ] |
| Cardiovascular Health Study (CHS)                                     | 3.18%      | 1.12 [ 1.00 , 1.26 ] |
| Western Collaborative Group Study (WCGS)                              | 3.01%      | 1.04 [ 0.92 , 1.17 ] |
| Rotterdam Study (RS)                                                  | 2.83%      | 1.04 [ 0.91 , 1.19 ] |
| Atherosclerosis Risk in Communities Study (ARIC)                      | 2.75%      | 1.29 [ 1.13 , 1.48 ] |
| Danish Diet, Cancer and Health study                                  | 2.67%      | 1.26 [ 1.10 , 1.45 ] |
| Busselton Health Study                                                | 2.56%      | 1.01 [ 0.88 , 1.17 ] |
| The Nord-Trøndelag Health Study 2 (HUNT 2)                            | 2.40%      | 1.14 [ 0.98 , 1.33 ] |
| Framingham Heart Study-Cohort                                         | 2.34%      | 1.00 [ 0.85 , 1.16 ] |
| Study of Multifactorial Prevention of Ischemic Heart Disease          | 2.22%      | 0.90 [ 0.77 , 1.06 ] |
| Cohort of Norway (CONOR) (except Tromsø and HUNT studies)             | 2.06%      | 1.11 [ 0.94 , 1.32 ] |
| Framingham Heart Study-Offspring                                      | 1.95%      | 1.25 [ 1.04 , 1.49 ] |
| Dubbo Study of the Elderly                                            | 1.91%      | 1.23 [ 1.03 , 1.47 ] |
| Kaunas Rotterdam Intervention Study (KRIS)                            | 1.69%      | 0.92 [ 0.76 , 1.13 ] |
| Prospective Cardiovascular Munster Study (PROCAM)                     | 1.66%      | 1.33 [ 1.09 , 1.62 ] |
| US Railroad Cohort, Seven Countries Study                             | 1.46%      | 0.93 [ 0.75 , 1.16 ] |
| Puerto Rico Heart Health Program (PRHHP)                              | 1.35%      | 1.04 [ 0.83 , 1.31 ] |
| Canada Nutrition Database                                             | 1.22%      | 0.82 [ 0.64 , 1.05 ] |
| East and West Finland Cohort, Seven Countries Study, Phase I          | 1.18%      | 1.25 [ 0.97 , 1.61 ] |
| Korean Medical Insurance Corporation Study (KMIC)                     | 1.08%      | 1.19 [ 0.92 , 1.55 ] |
| Busselton Health Study (BHS)                                          | 1.04%      | 1.04 [ 0.80 , 1.37 ] |
| Melbourne Collaborative Study (MCCS)                                  | 1.01%      | 1.03 [ 0.78 , 1.36 ] |
| General Post Office Study (GPO)                                       | 0.97%      | 1.07 [ 0.81 , 1.42 ] |
| LIFE Study                                                            | 0.90%      | 1.04 [ 0.77 , 1.39 ] |
| Chinese Multi-Provincial Cohort Study (CMCS)                          | 0.90%      | 1.46 [ 1.09 , 1.96 ] |
| CVDFACTS                                                              | 0.85%      | 1.35 [ 1.00 , 1.83 ] |
| Uppsala Longitudinal Study of Adult Men (ULSAM)                       | 0.85%      | 1.16 [ 0.86 , 1.57 ] |
| Prospective Study of Women in Gothenburg                              | 0.84%      | 1.27 [ 0.93 , 1.72 ] |
| Multi-Ethnic Study of Atherosclerosis (MESA)                          | 0.80%      | 0.94 [ 0.69 , 1.30 ] |
| Tehran Lipid and Glucose Study (TLGS)                                 | 0.79%      | 1.49 [ 1.08 , 2.04 ] |
| The Northern Manhattan Study (NOMAS)                                  | 0.78%      | 1.13 [ 0.82 , 1.55 ] |
| Crevalcore, Montegiorgio and Rome Cohort, Seven Countries Study       | 0.75%      | 1.12 [ 0.81 , 1.55 ] |
| Fletcher Challenge Heart and Health Study                             | 0.68%      | 1.17 [ 0.83 , 1.66 ] |
| EURODIAB Prospective Complications Study                              | 0.64%      | 1.23 [ 0.86 , 1.75 ] |
| Perth Risk Factors Survey (Perth MONICA)                              | 0.63%      | 1.17 [ 0.82 , 1.67 ] |
| MEGA Study                                                            | 0.63%      | 1.13 [ 0.79 , 1.62 ] |
| Turkish Adult Risk Factor Study (TARF)                                | 0.62%      | 1.71 [ 1.19 , 2.46 ] |
| Zutphen cohort, Seven Countries Study, Phase I                        | 0.59%      | 1.06 [ 0.73 , 1.54 ] |
| National Heart foundation Risk Factor Prevalence Study                | 0.48%      | 1.27 [ 0.84 , 1.93 ] |
| Women's Health Initiative study, Clinical Trial (WHI-CT)              | 0.48%      | 1.29 [ 0.85 , 1.97 ] |
| Singapore Cardiovascular Cohort Study                                 | 0.48%      | 1.14 [ 0.75 , 1.74 ] |
| The Hisayama Study                                                    | 0.46%      | 1.36 [ 0.89 , 2.08 ] |
| Beijing Iron and Steel Worker Cohort Study                            | 0.35%      | 1.15 [ 0.70 , 1.89 ] |
| SENECA                                                                | 0.33%      | 0.74 [ 0.44 , 1.23 ] |
| Dalmatia and Slavonia Cohort, Seven Countries Study                   | 0.32%      | 1.12 [ 0.66 , 1.89 ] |
| Zrenjanin, Belgrade and Velika Krsna Cohort, Seven Countries Study    | 0.32%      | 1.96 [ 1.16 , 3.31 ] |
| Whitehall II Study                                                    | 0.31%      | 1.57 [ 0.93 , 2.67 ] |
| DETECT                                                                | 0.30%      | 1.30 [ 0.77 , 2.23 ] |
| NIPPON DATA80                                                         | 0.28%      | 1.16 [ 0.67 , 2.02 ] |
| Goteborg BEDA study                                                   | 0.25%      | 1.14 [ 0.63 , 2.05 ] |
| Risk of ischaemic heart disease in Zaragoza (ZACARIS)                 | 0.24%      | 2.03 [ 1.12 , 3.69 ] |
| East and West Finland Cohort, Seven Countries Study, Phase II         | 0.24%      | 1.06 [ 0.58 , 1.94 ] |
| Hisayama Study                                                        | 0.21%      | 1.60 [ 0.84 , 3.04 ] |
| Diabetes Intervention Study                                           | 0.21%      | 1.53 [ 0.80 , 2.93 ] |
| JMS-ABPM (wave 1)                                                     | 0.20%      | 1.03 [ 0.53 , 1.99 ] |
| Shibata Cohort Study                                                  | 0.20%      | 2.30 [ 1.19 , 4.47 ] |
| Akabane Study                                                         | 0.18%      | 0.65 [ 0.33 , 1.31 ] |
| Corfu and Crete Cohort, Seven Countries Study                         | 0.15%      | 1.27 [ 0.59 , 2.73 ] |
| Australia Longitudinal Study of Ageing (ALSA)                         | 0.15%      | 1.20 [ 0.56 , 2.59 ] |
| Ventimiglia di Sicilia Heart Study                                    | 0.12%      | 0.80 [ 0.34 , 1.88 ] |
| NIPPON DATA90                                                         | 0.12%      | 0.76 [ 0.32 , 1.78 ] |
| Electrical Generating Authority of Thailand Study (EGAT)              | 0.09%      | 0.64 [ 0.24 , 1.70 ] |
| Seven Cities Cohort Study                                             | 0.09%      | 0.73 [ 0.27 , 1.98 ] |
| Tanno - Soubetsu Study                                                | 0.06%      | 0.82 [ 0.25 , 2.67 ] |
| Six Chinese Cohorts Study                                             | 0.06%      | 1.29 [ 0.37 , 4.47 ] |
| Newcastle Study                                                       | 0.05%      | 2.04 [ 0.55 , 7.55 ] |
| Saitama Cohort Study                                                  | 0.04%      | 0.83 [ 0.17 , 4.02 ] |
| Tanushimaru and Ushibuka Cohort, Seven Countries Study                | 0.02%      | 0.25 [ 0.03 , 2.00 ] |

RE Model 100.00% 1.14 [ 1.11 , 1.18 ]  
 I<sup>2</sup> for heterogeneity : 31%

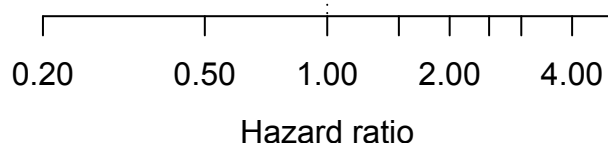

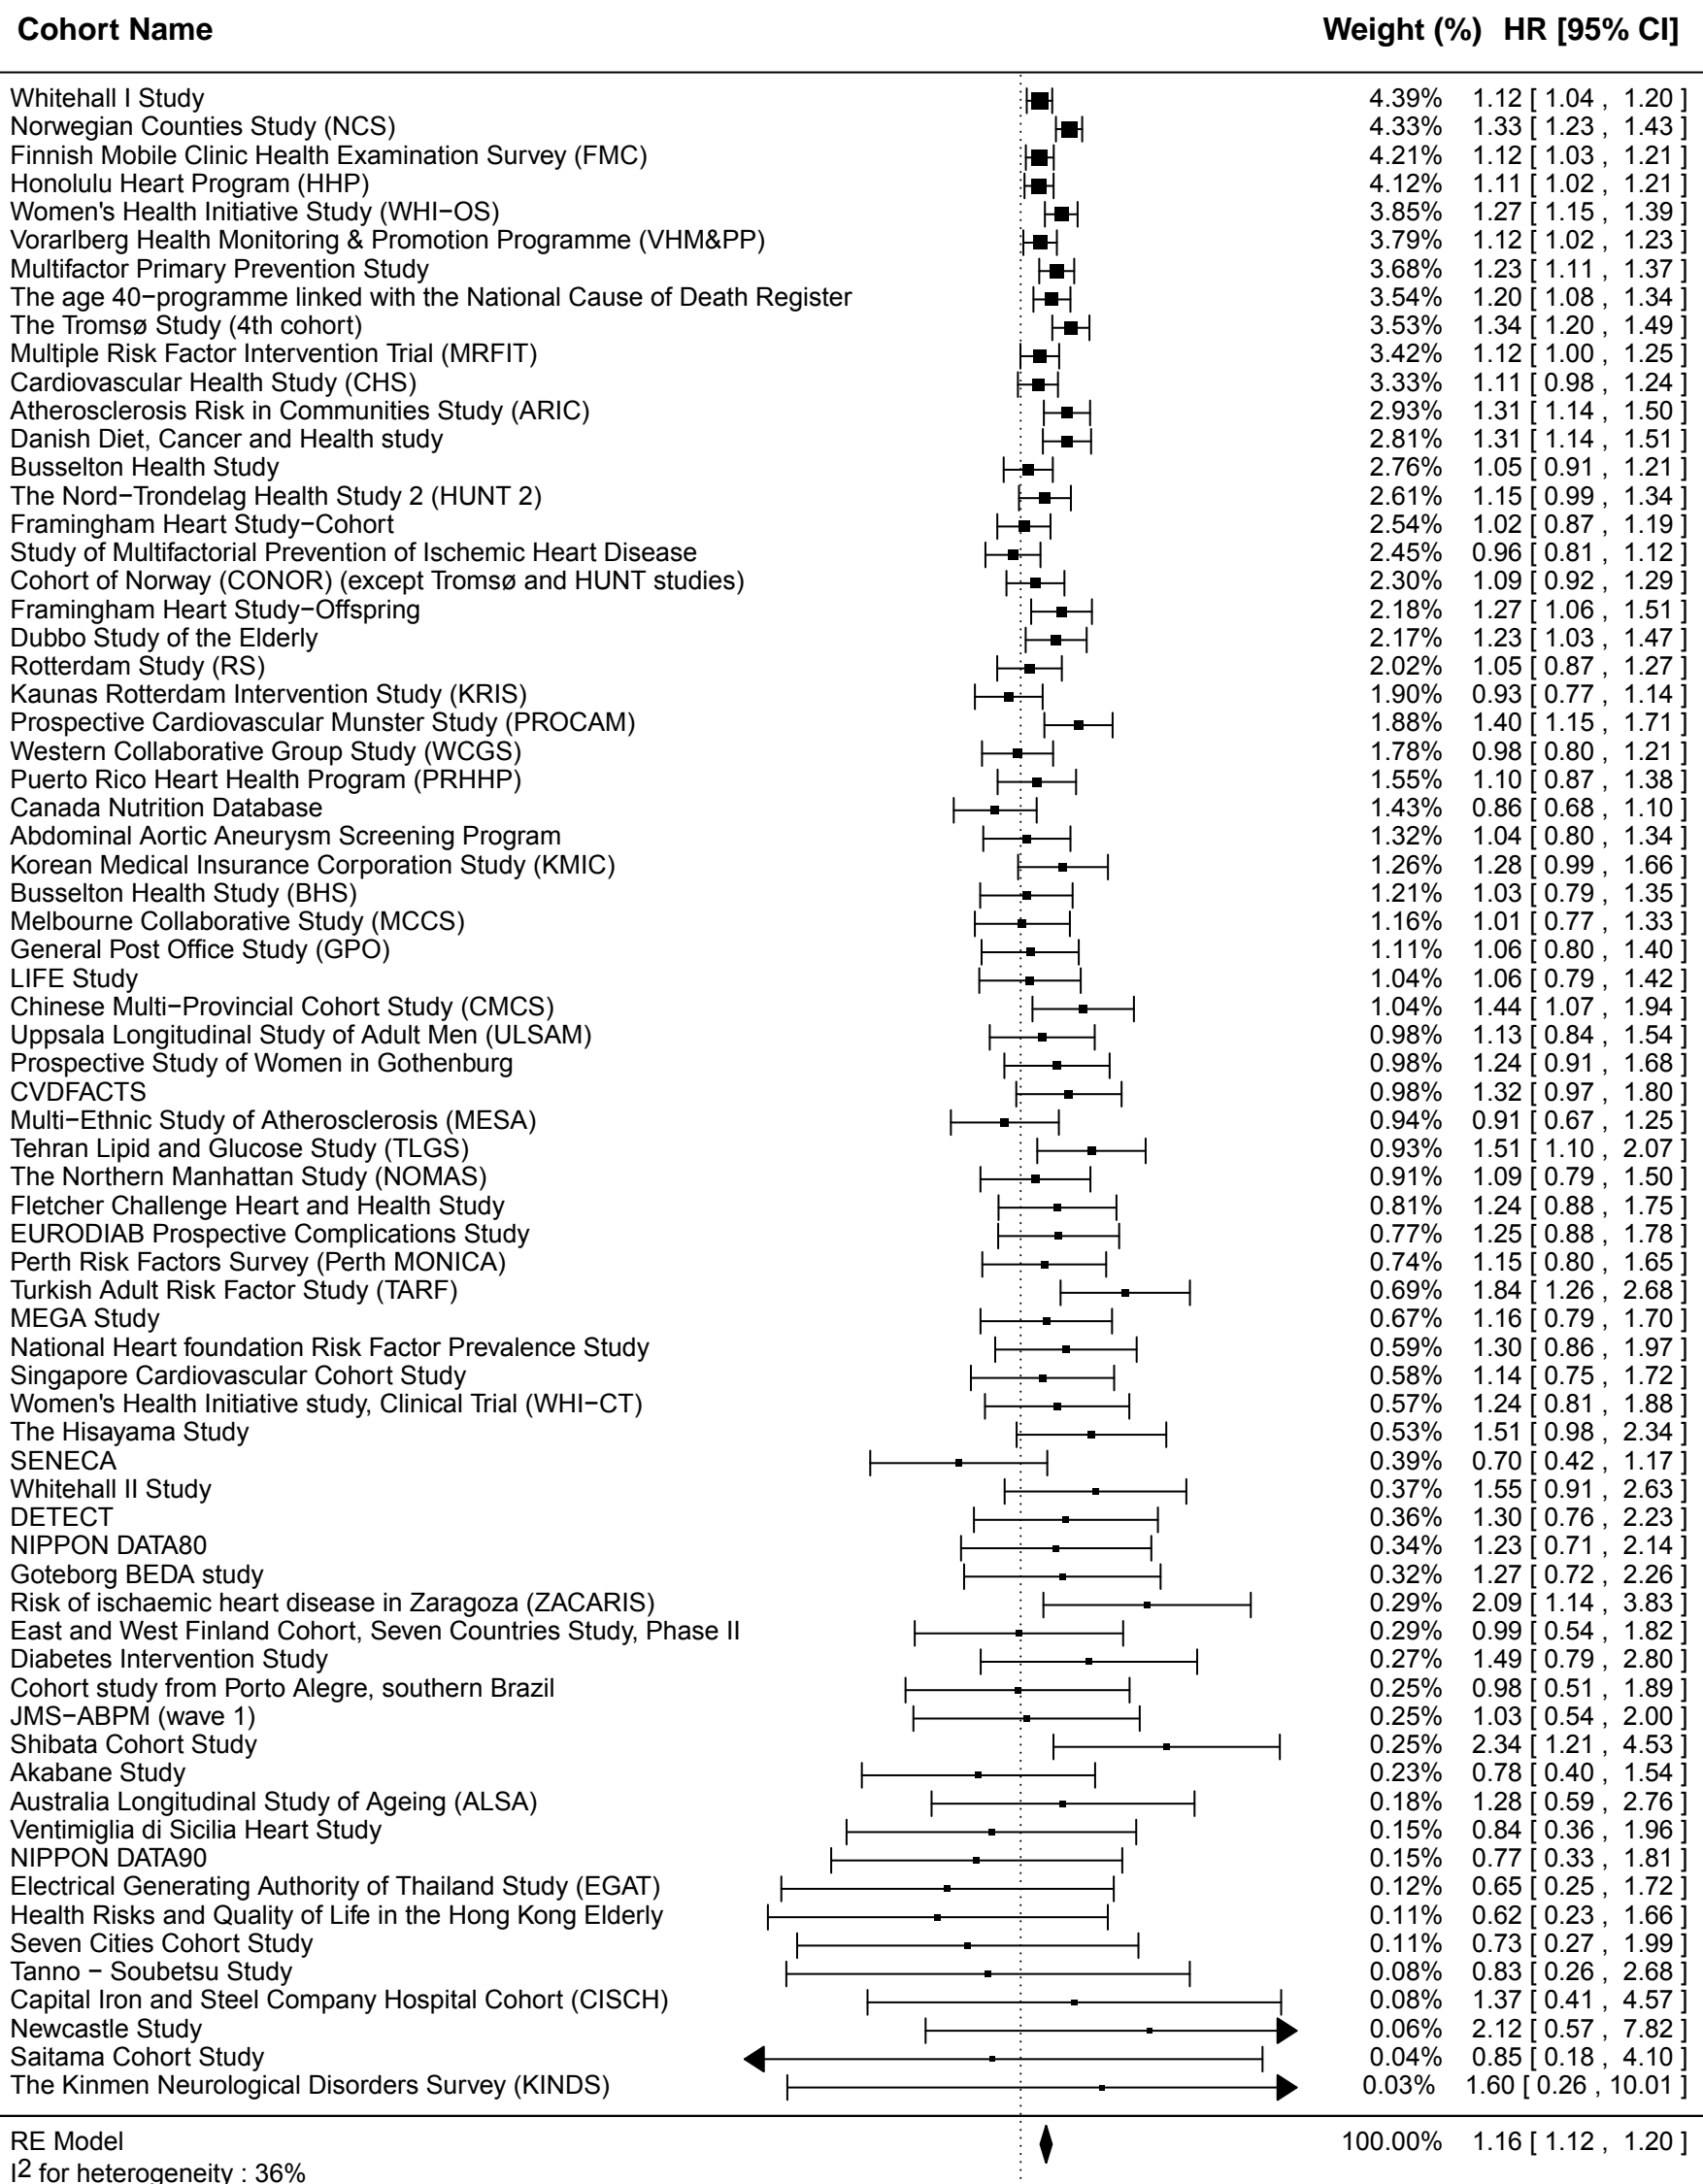

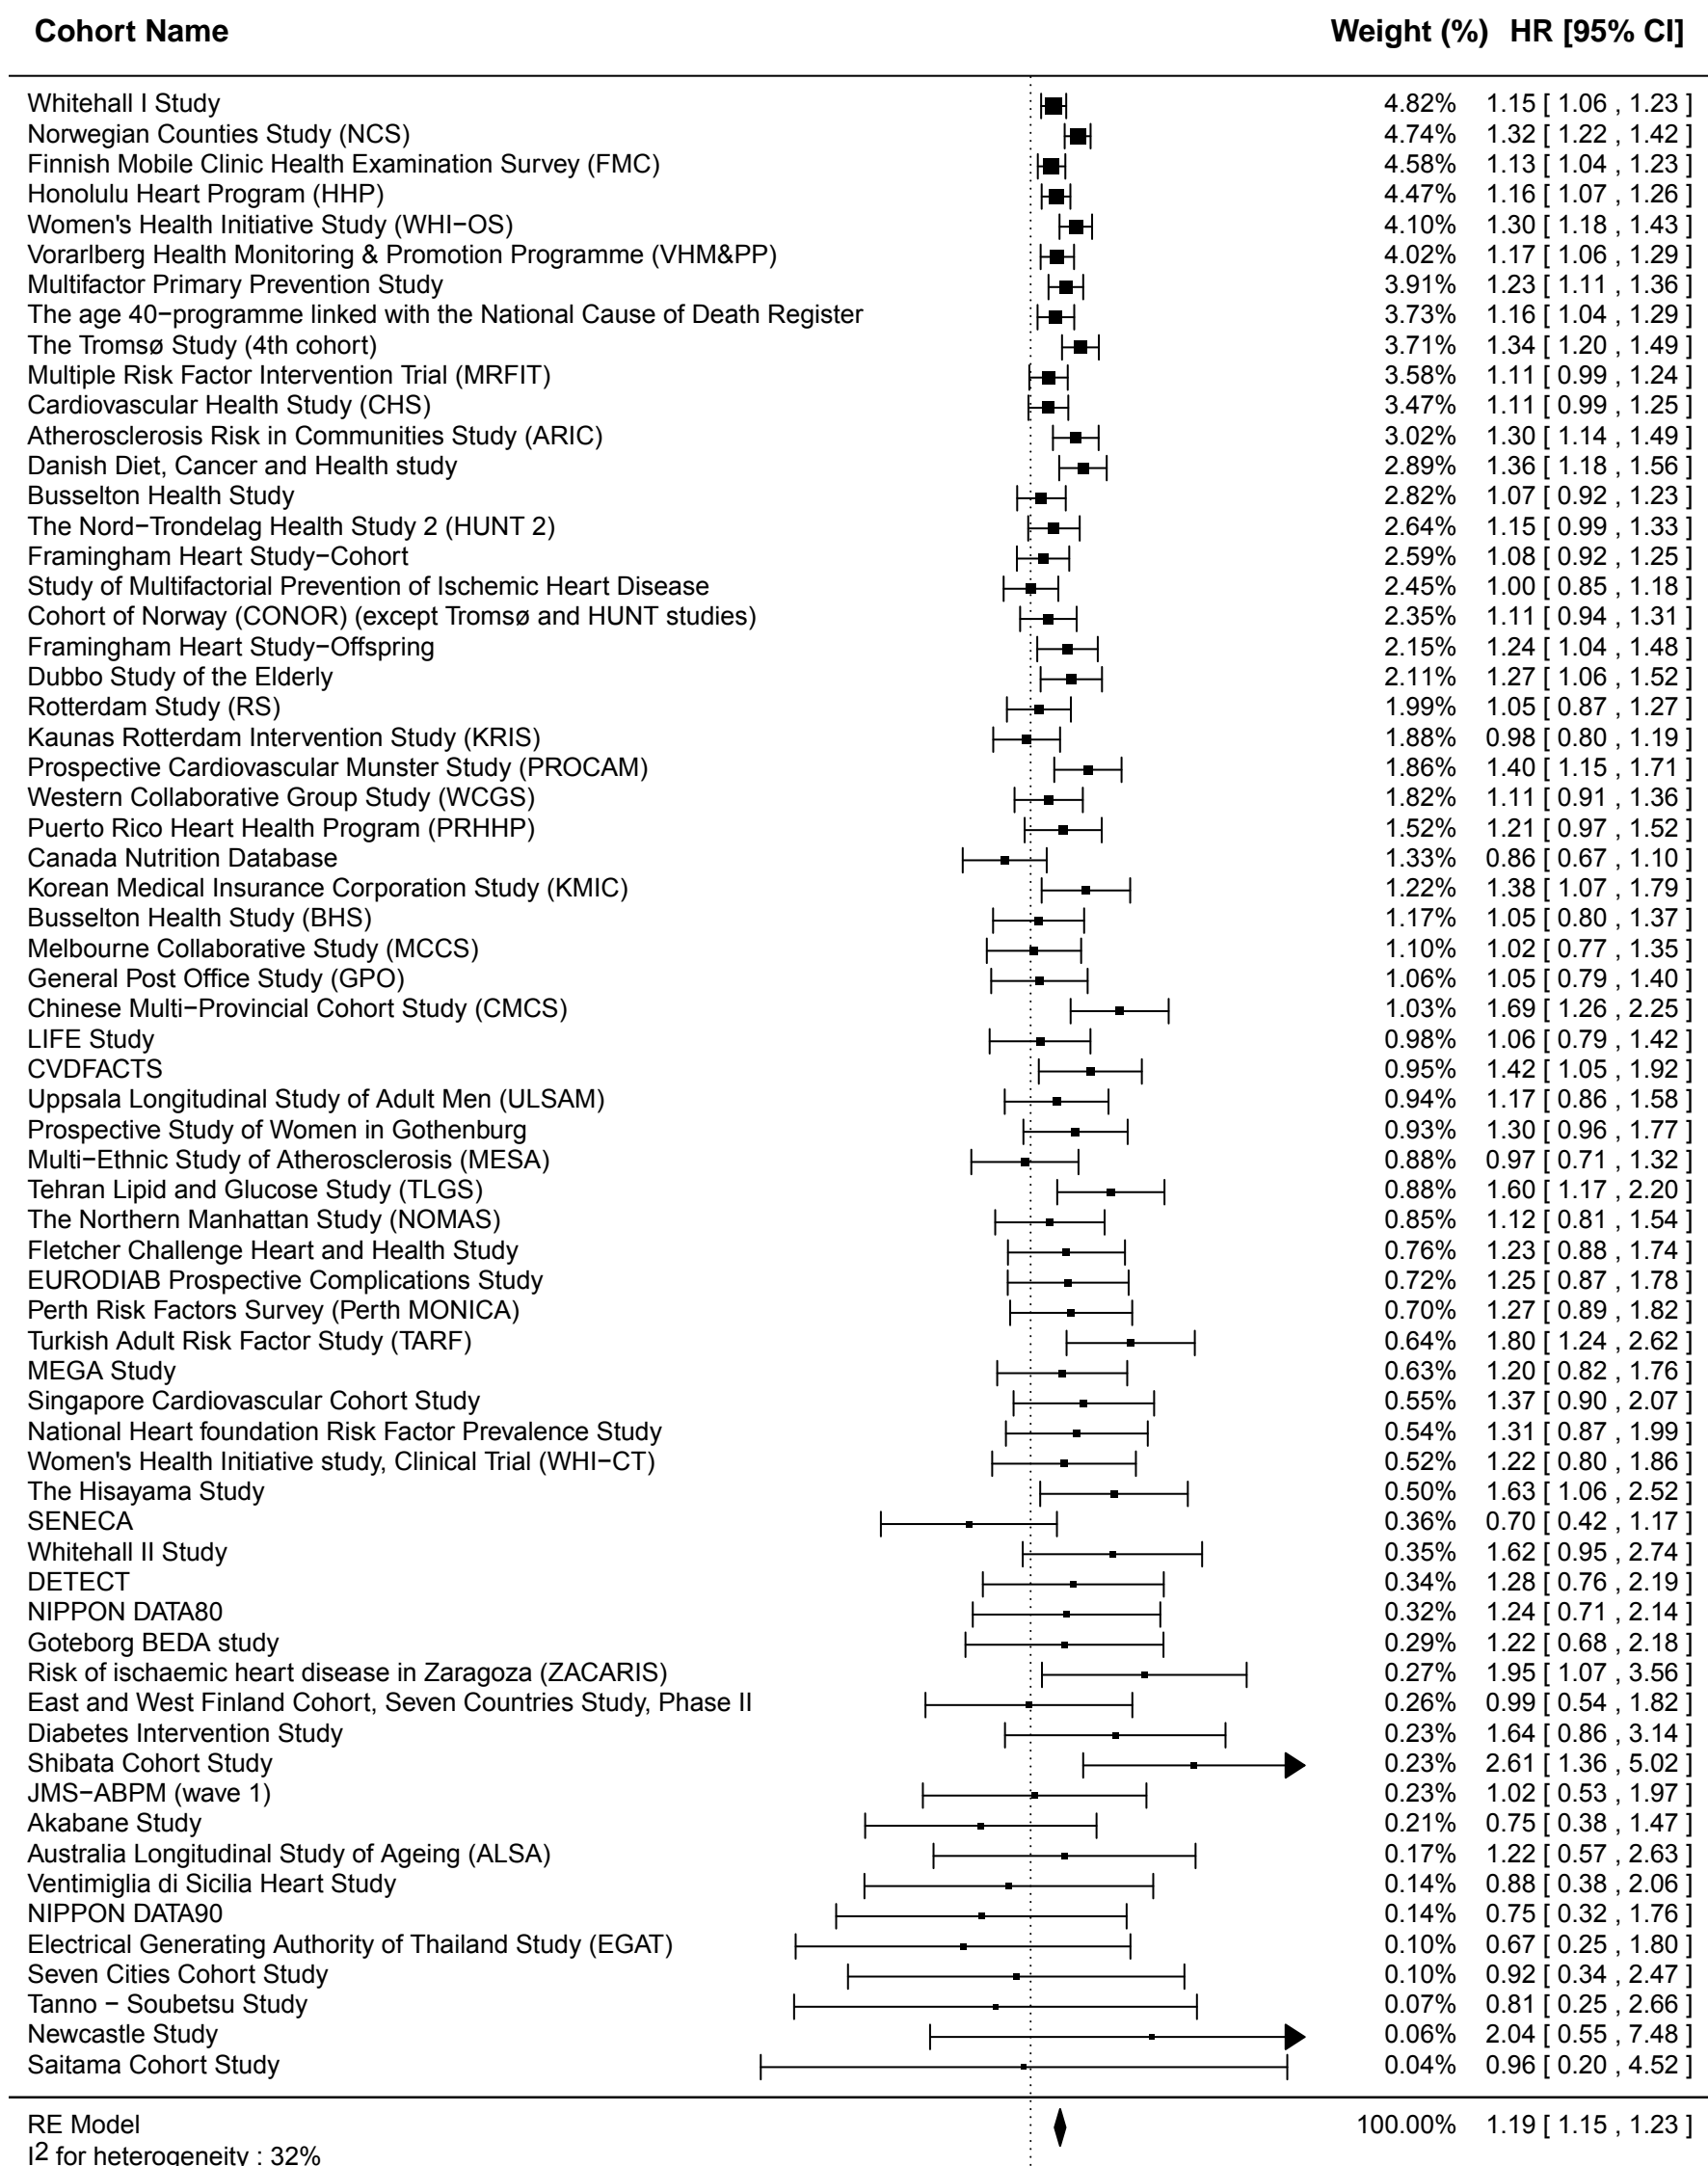

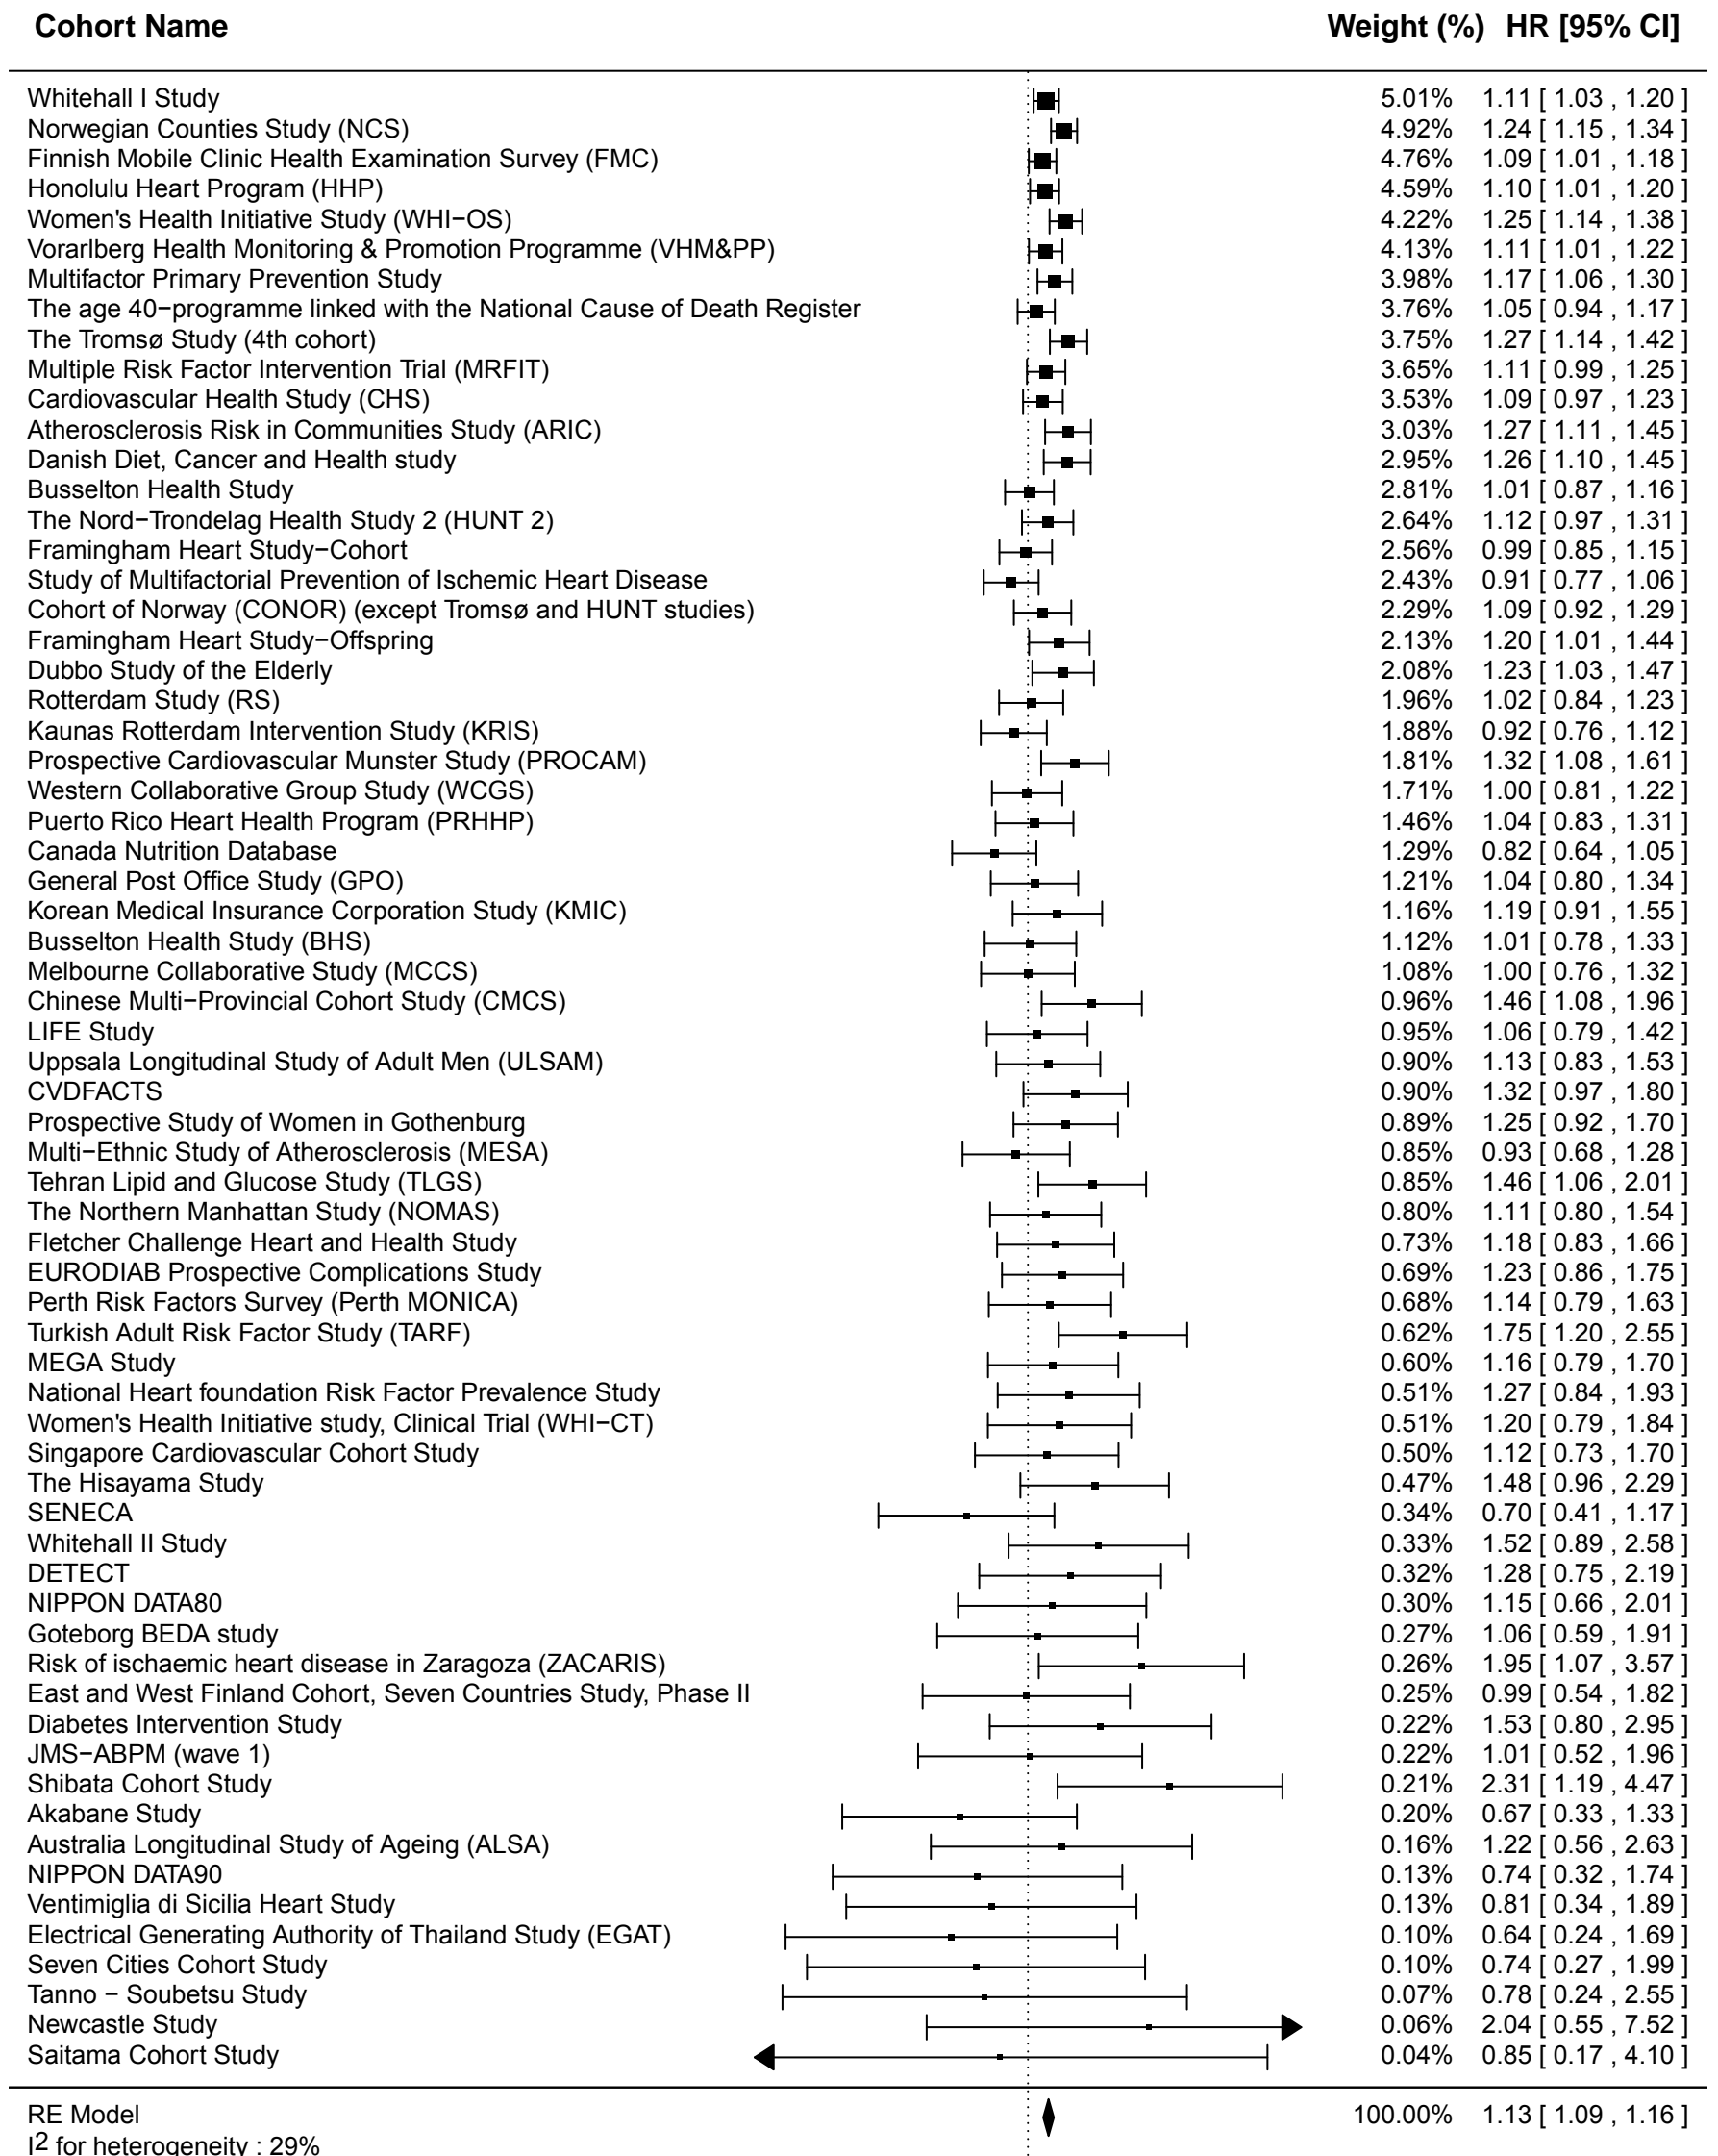

**Figure 5:** Cohort-specific hazard ratios (HRs) of stroke for overweight vs. normal weight.  
(Some cohorts that had BMI continuously did not have sufficient events in this BMI range for categorical analysis.)

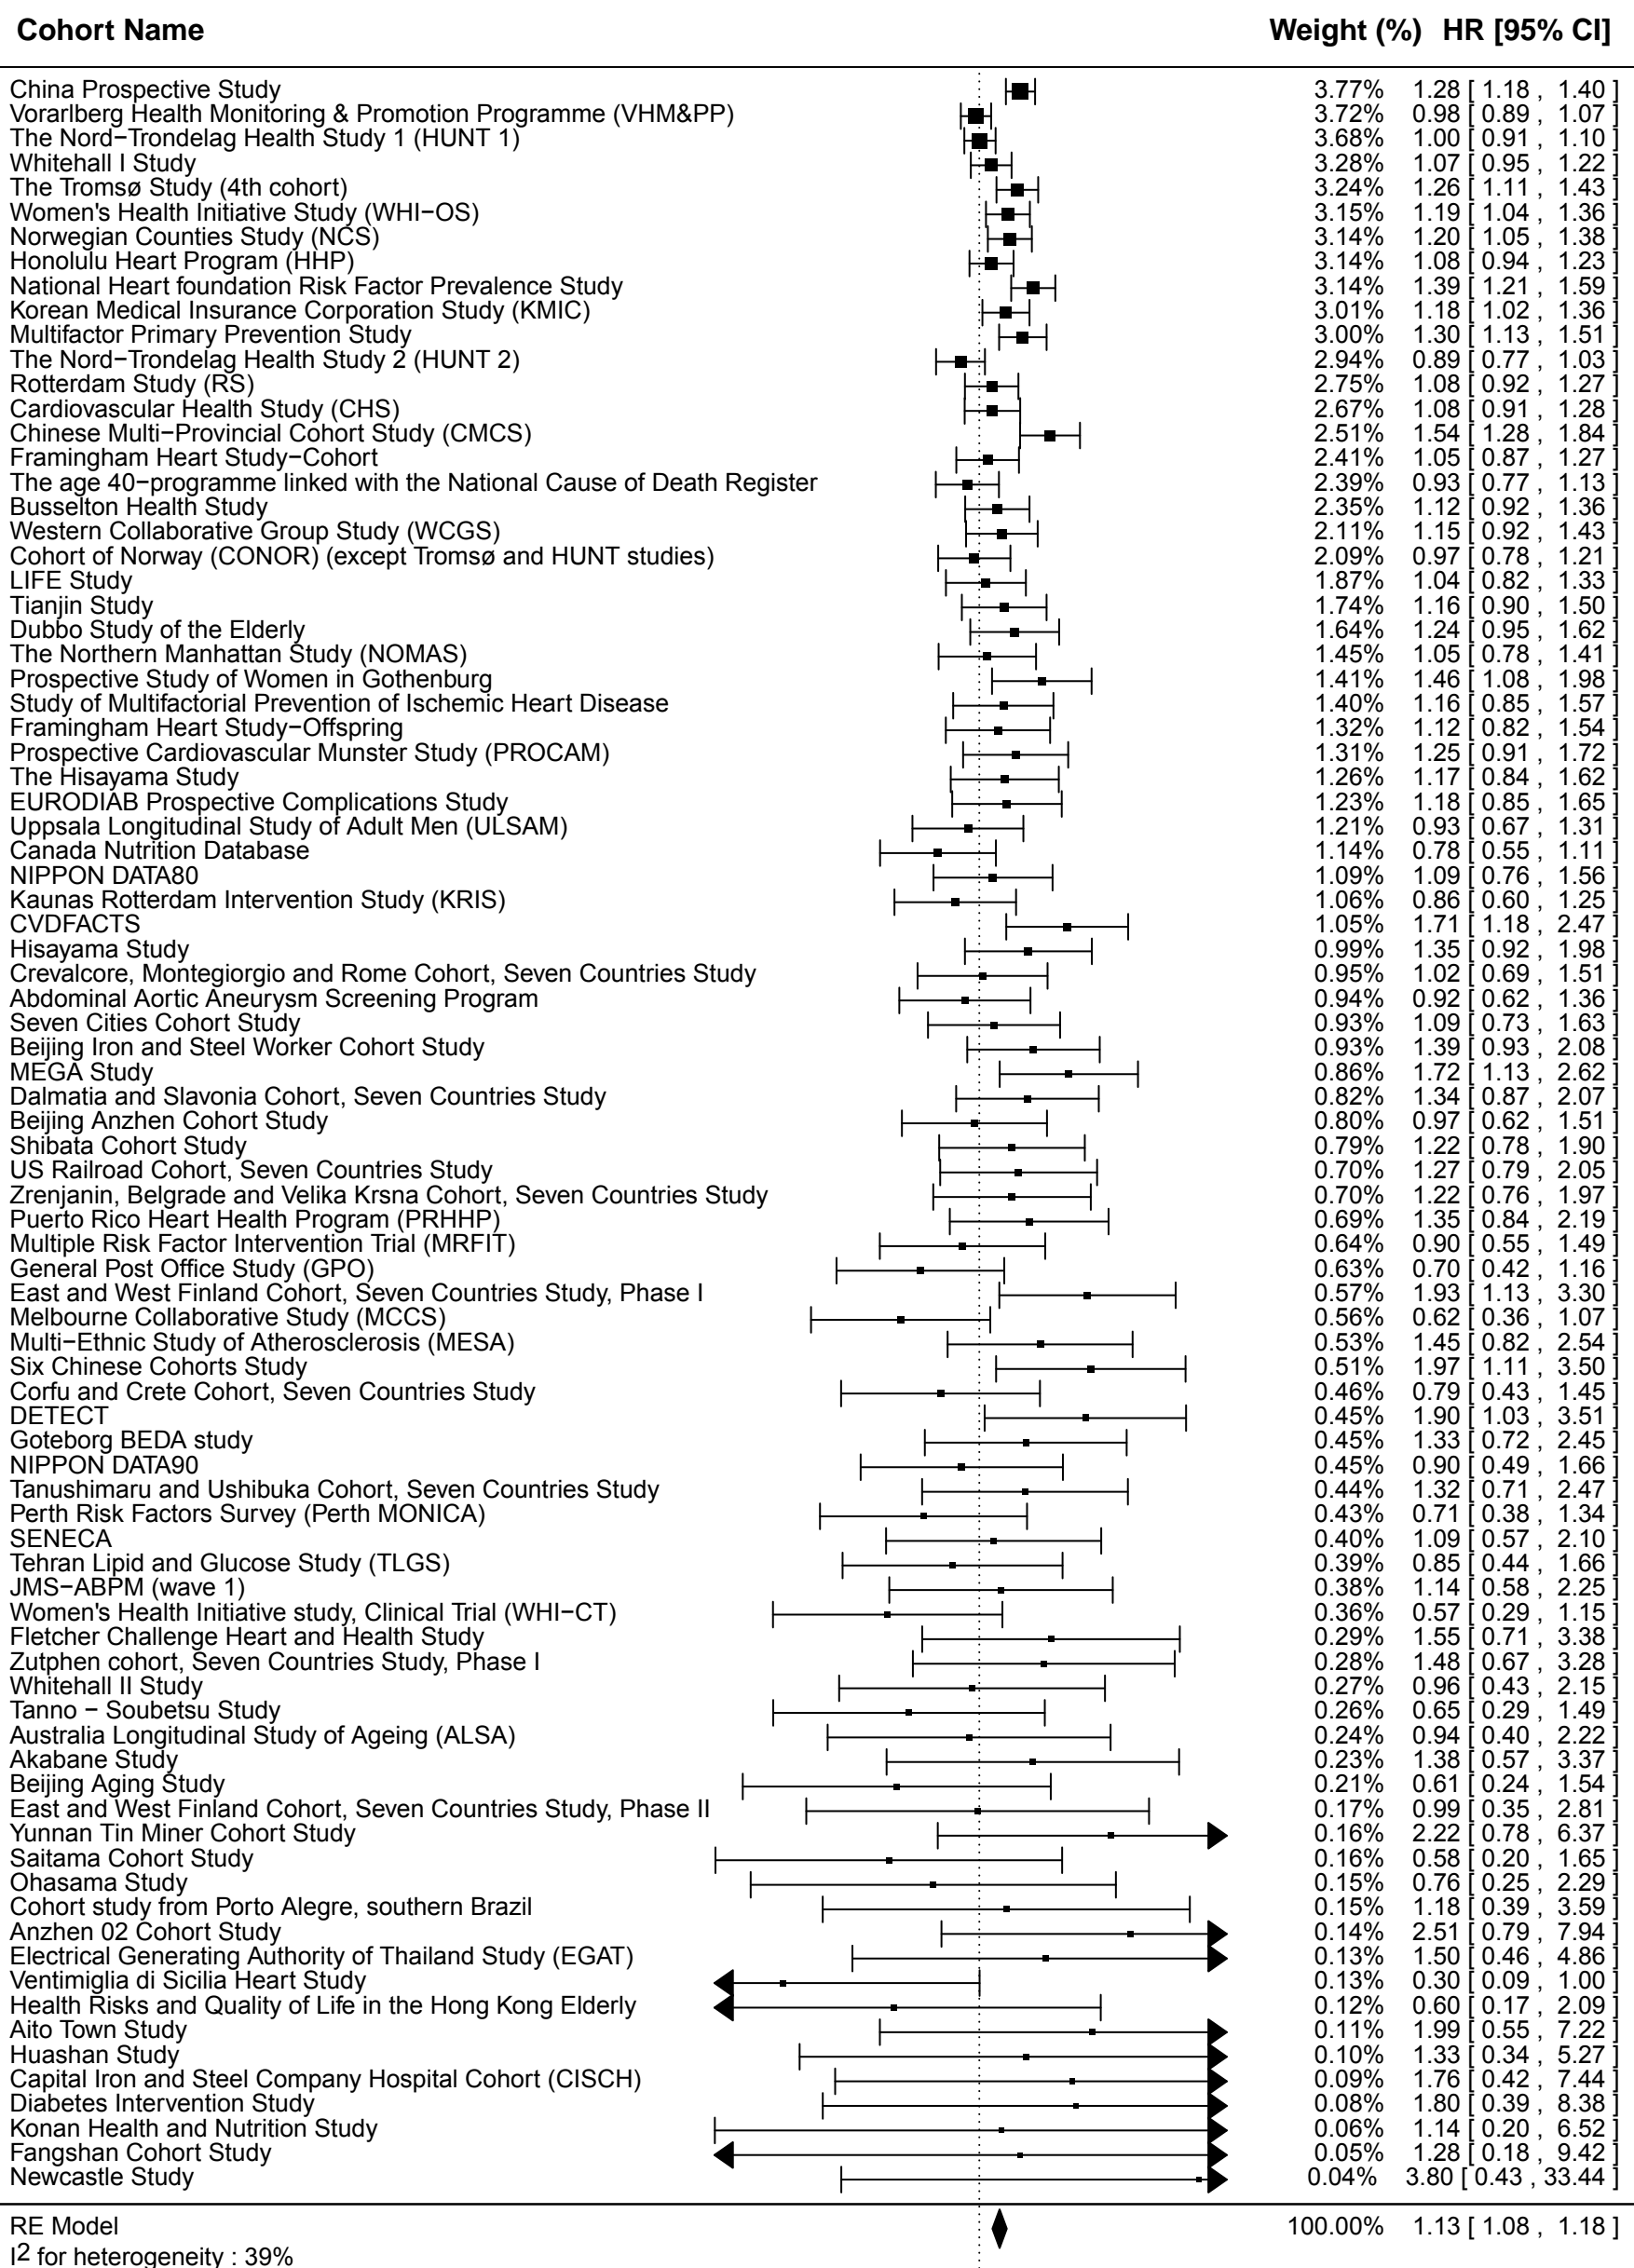



Cohort Name

Weight (%) HR [95% CI]

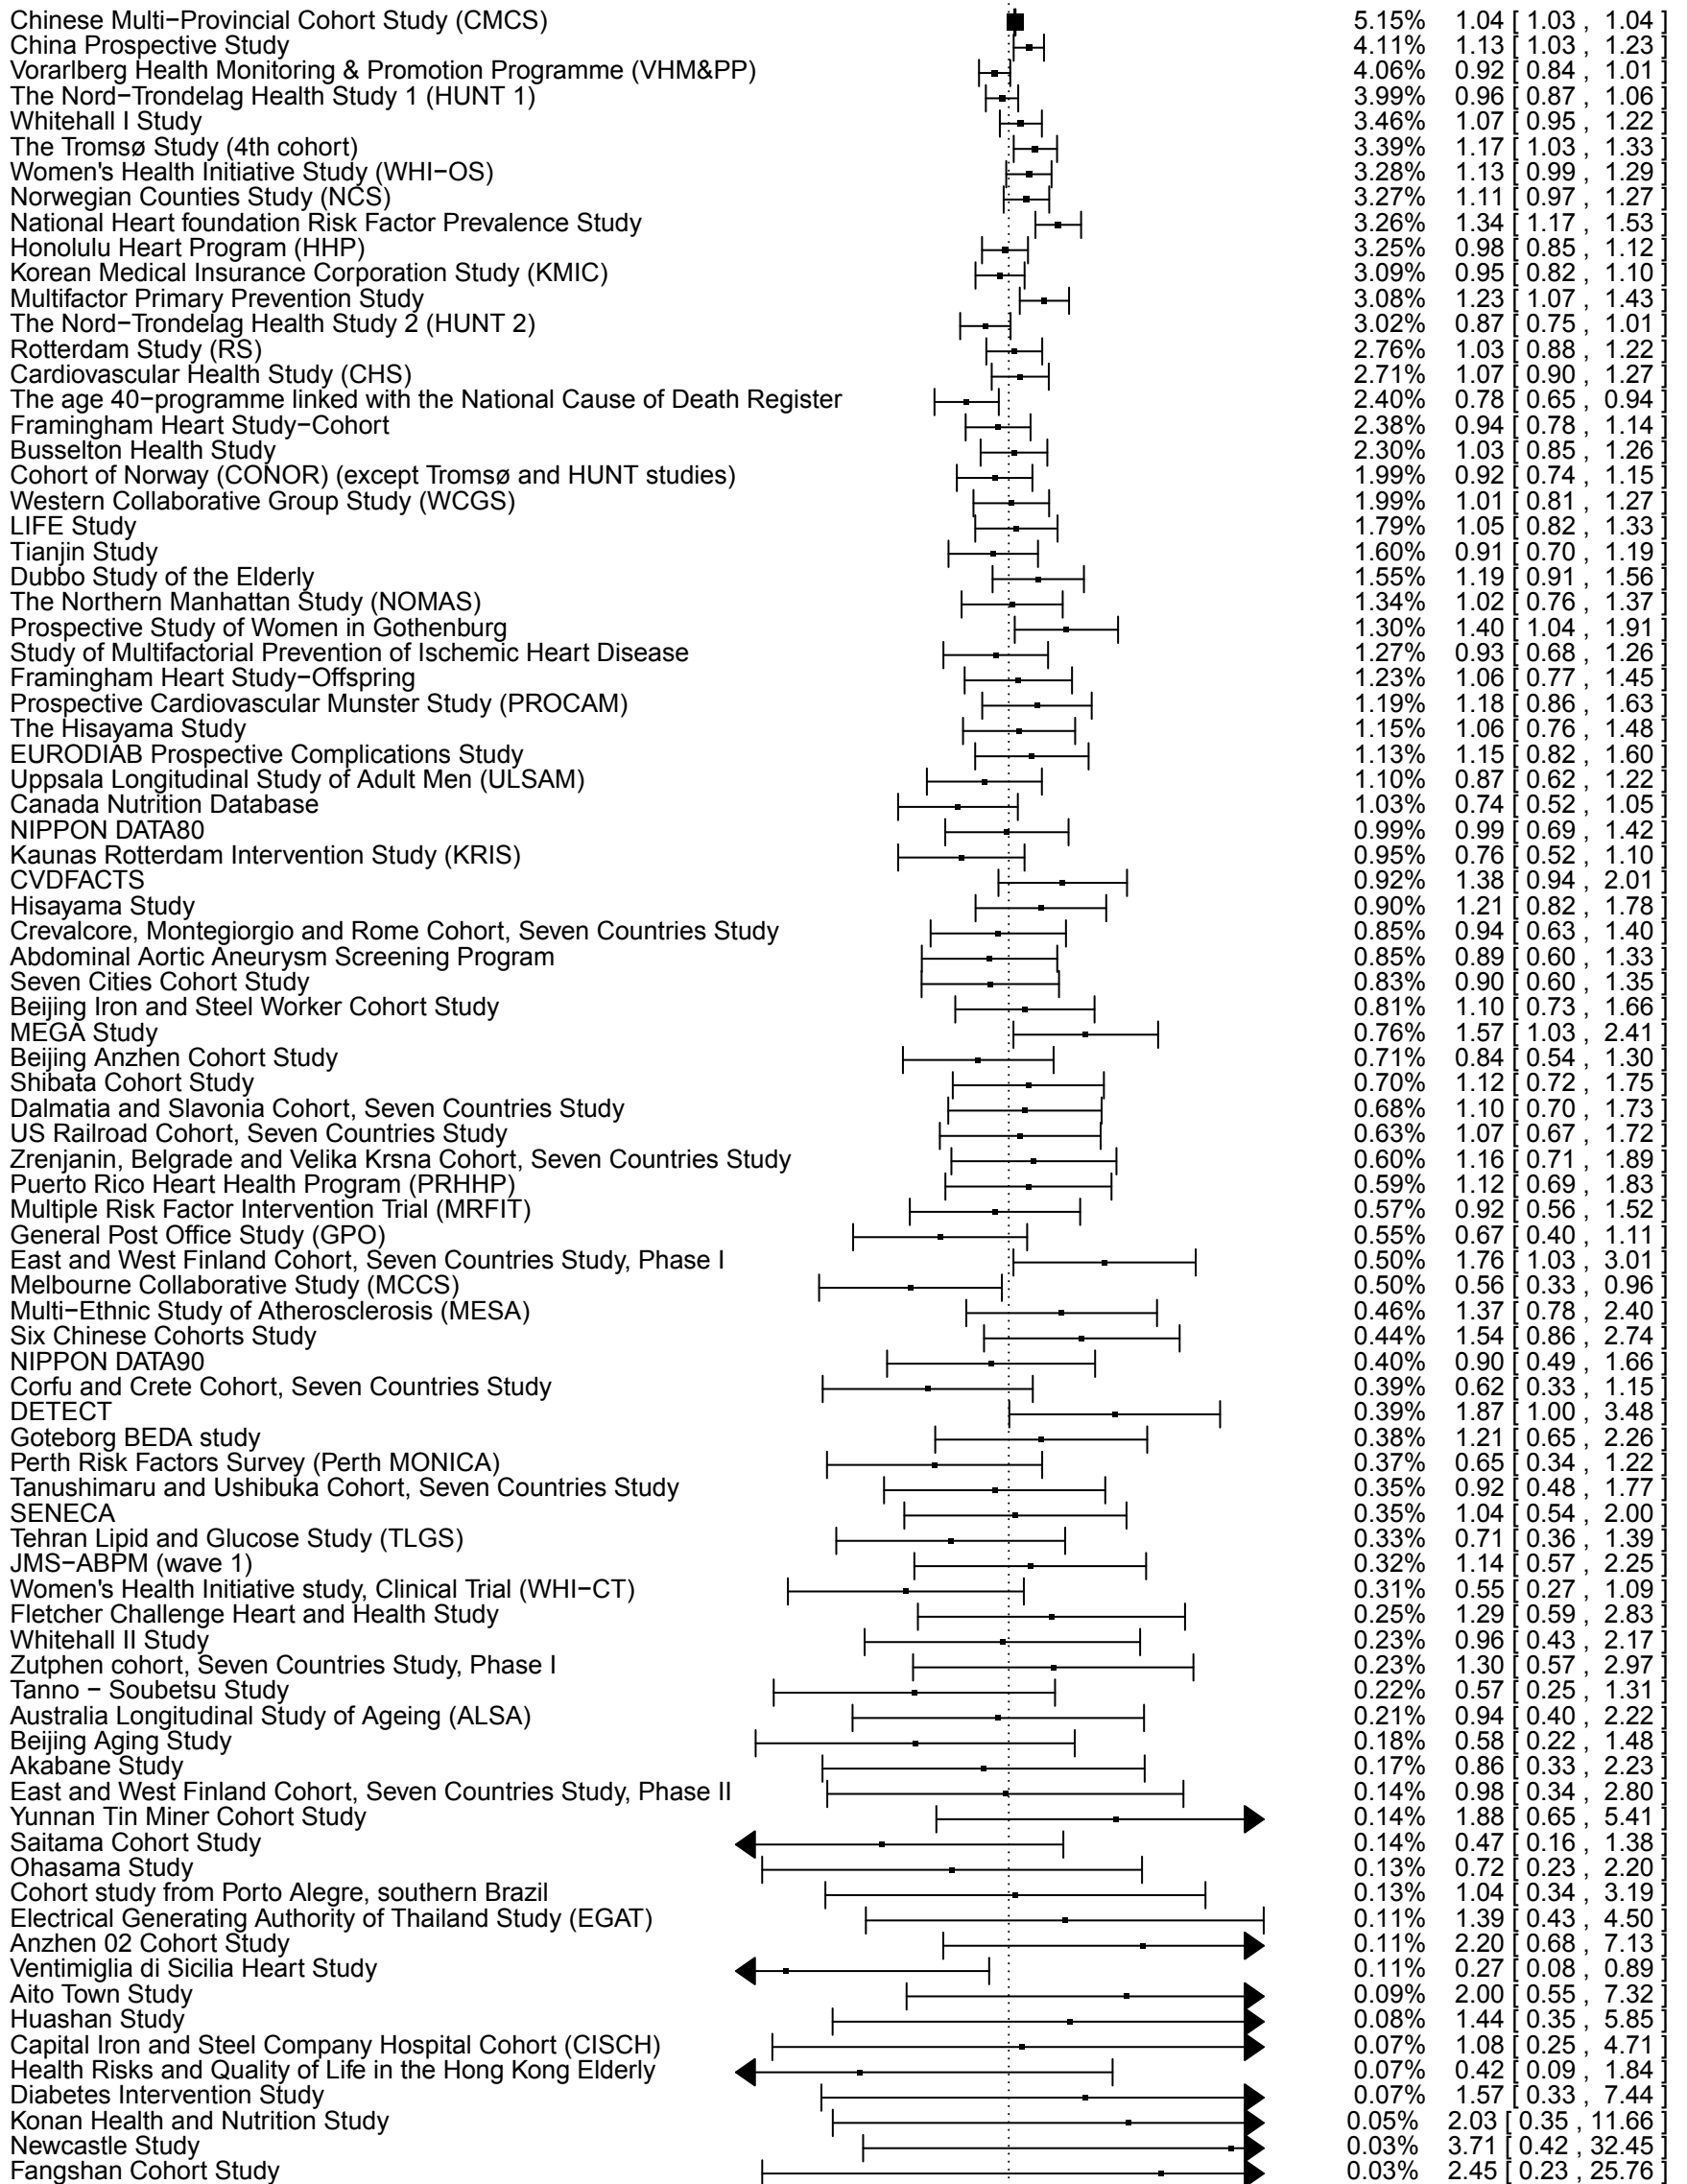

RE Model 100.00% 1.03 [0.99, 1.07]

I<sup>2</sup> for heterogeneity : 49%

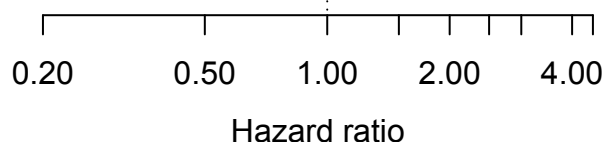

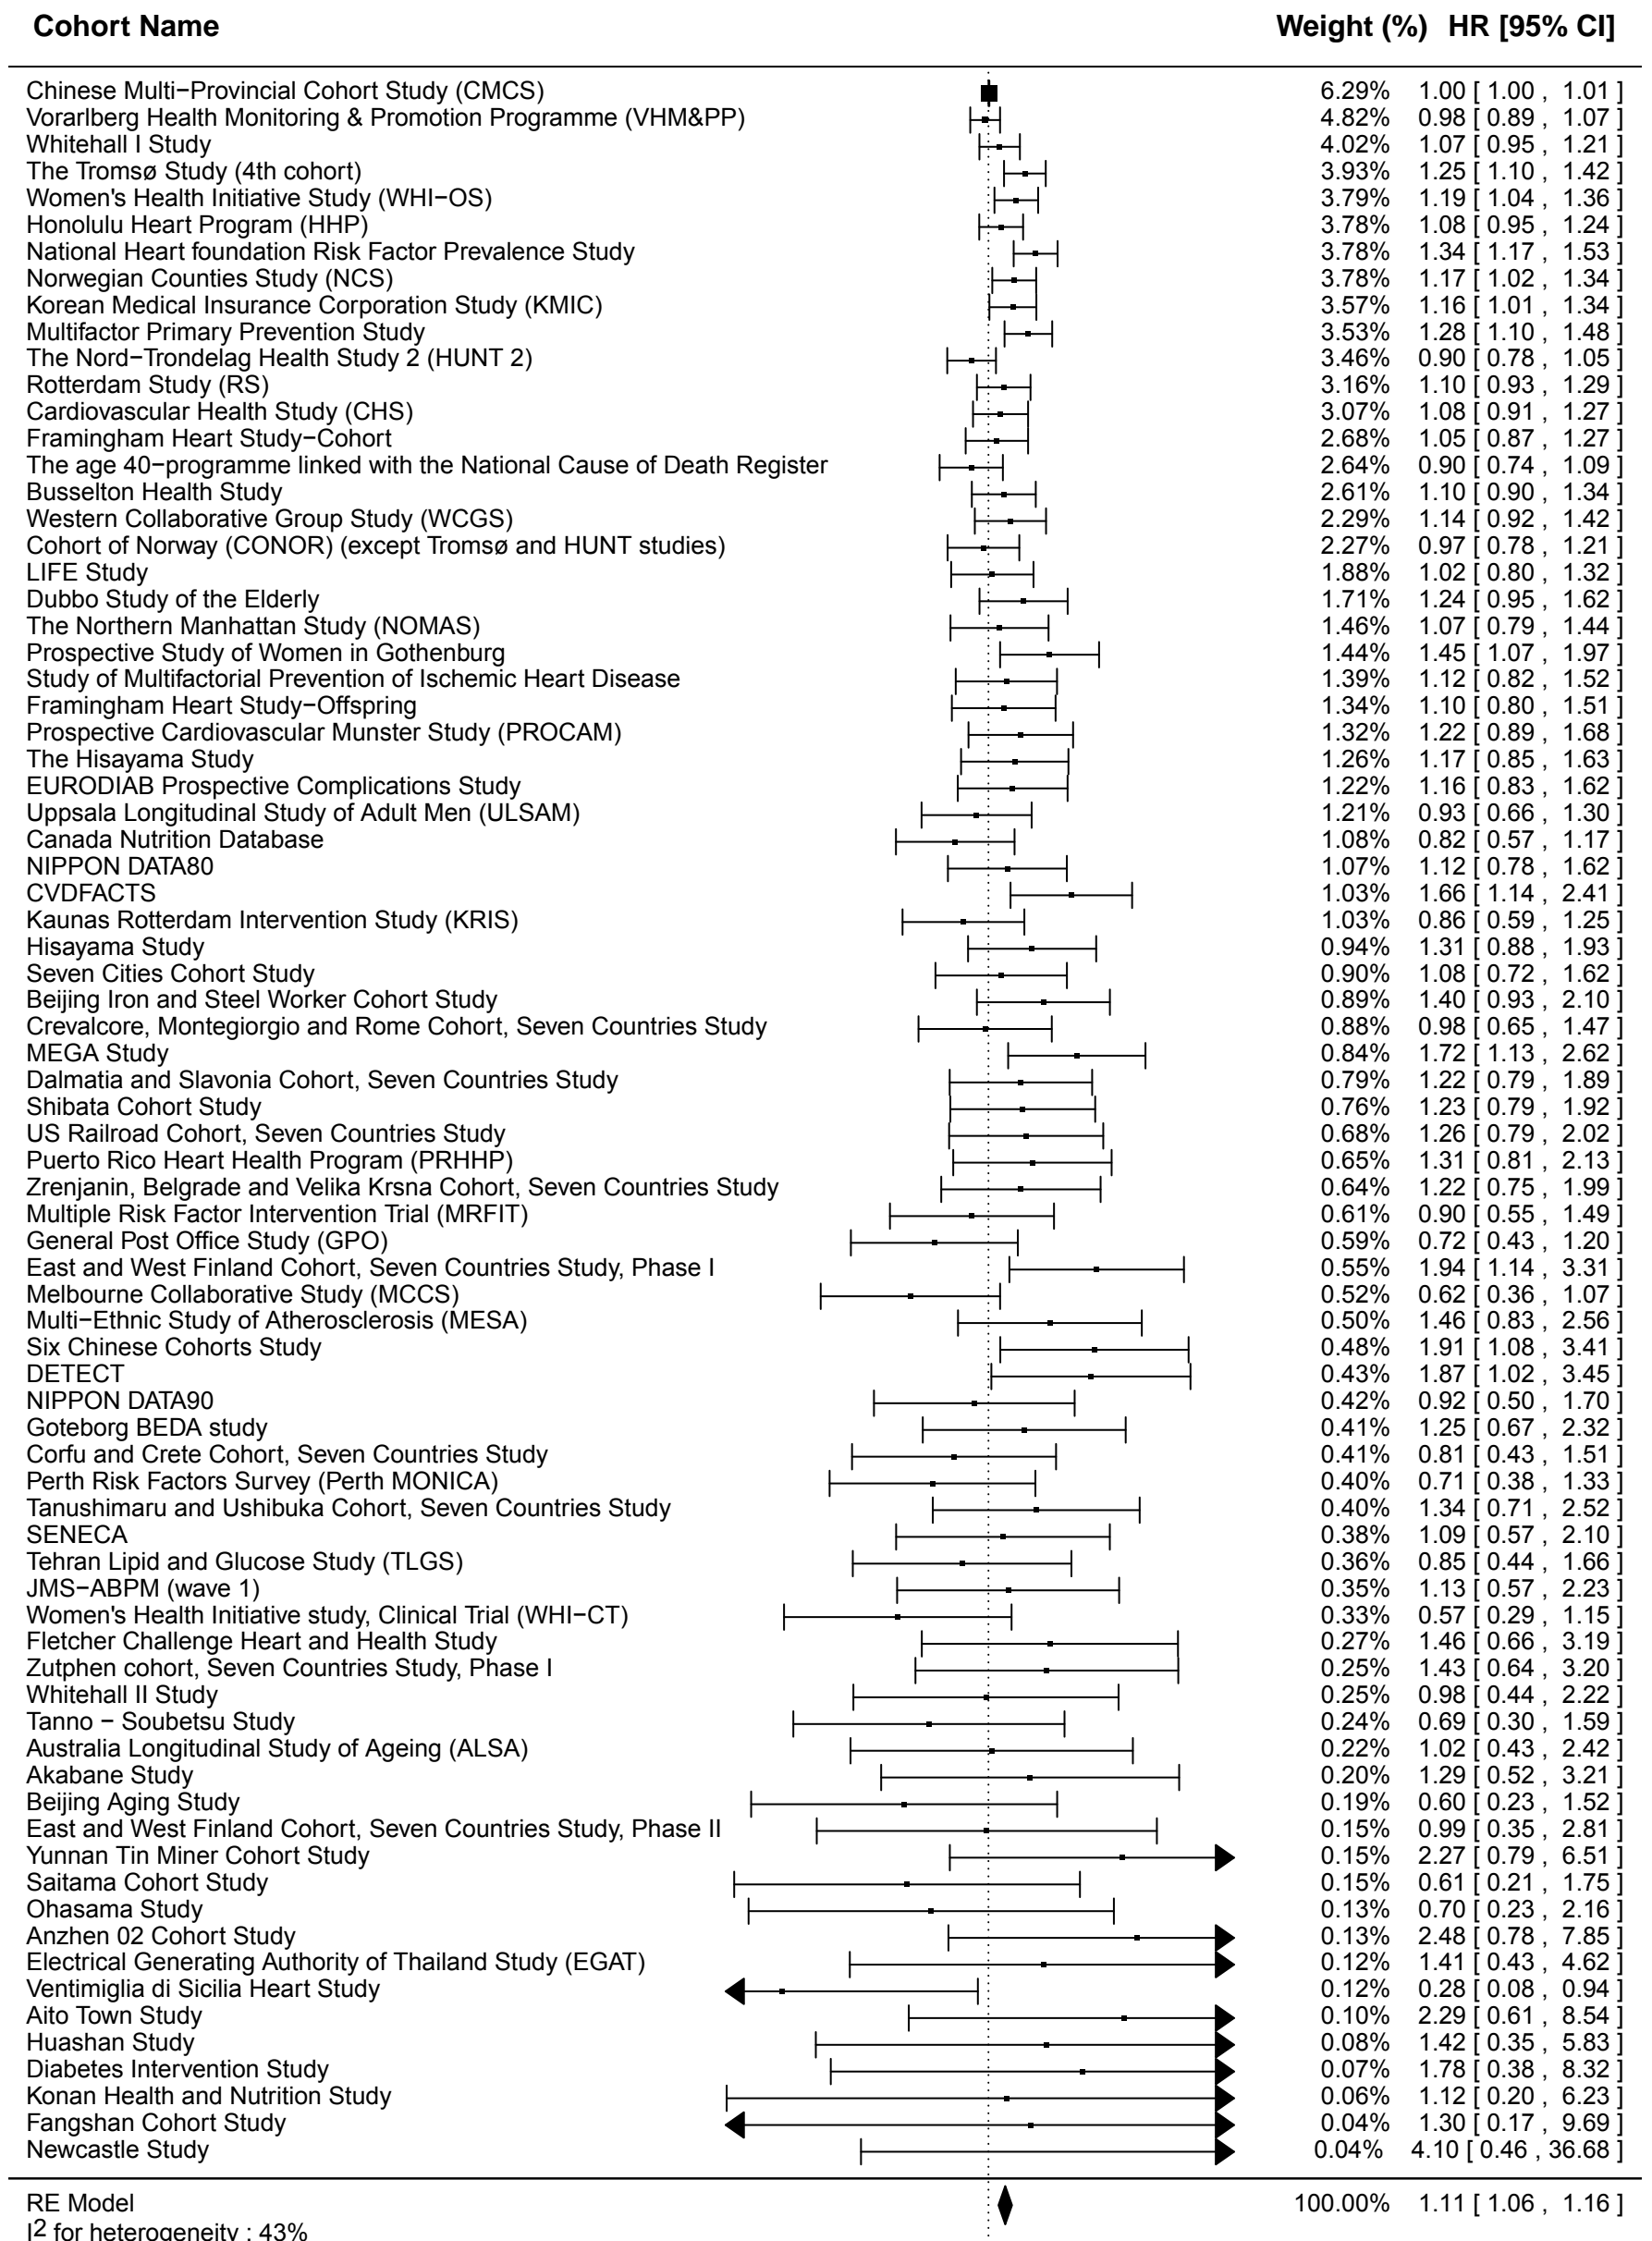

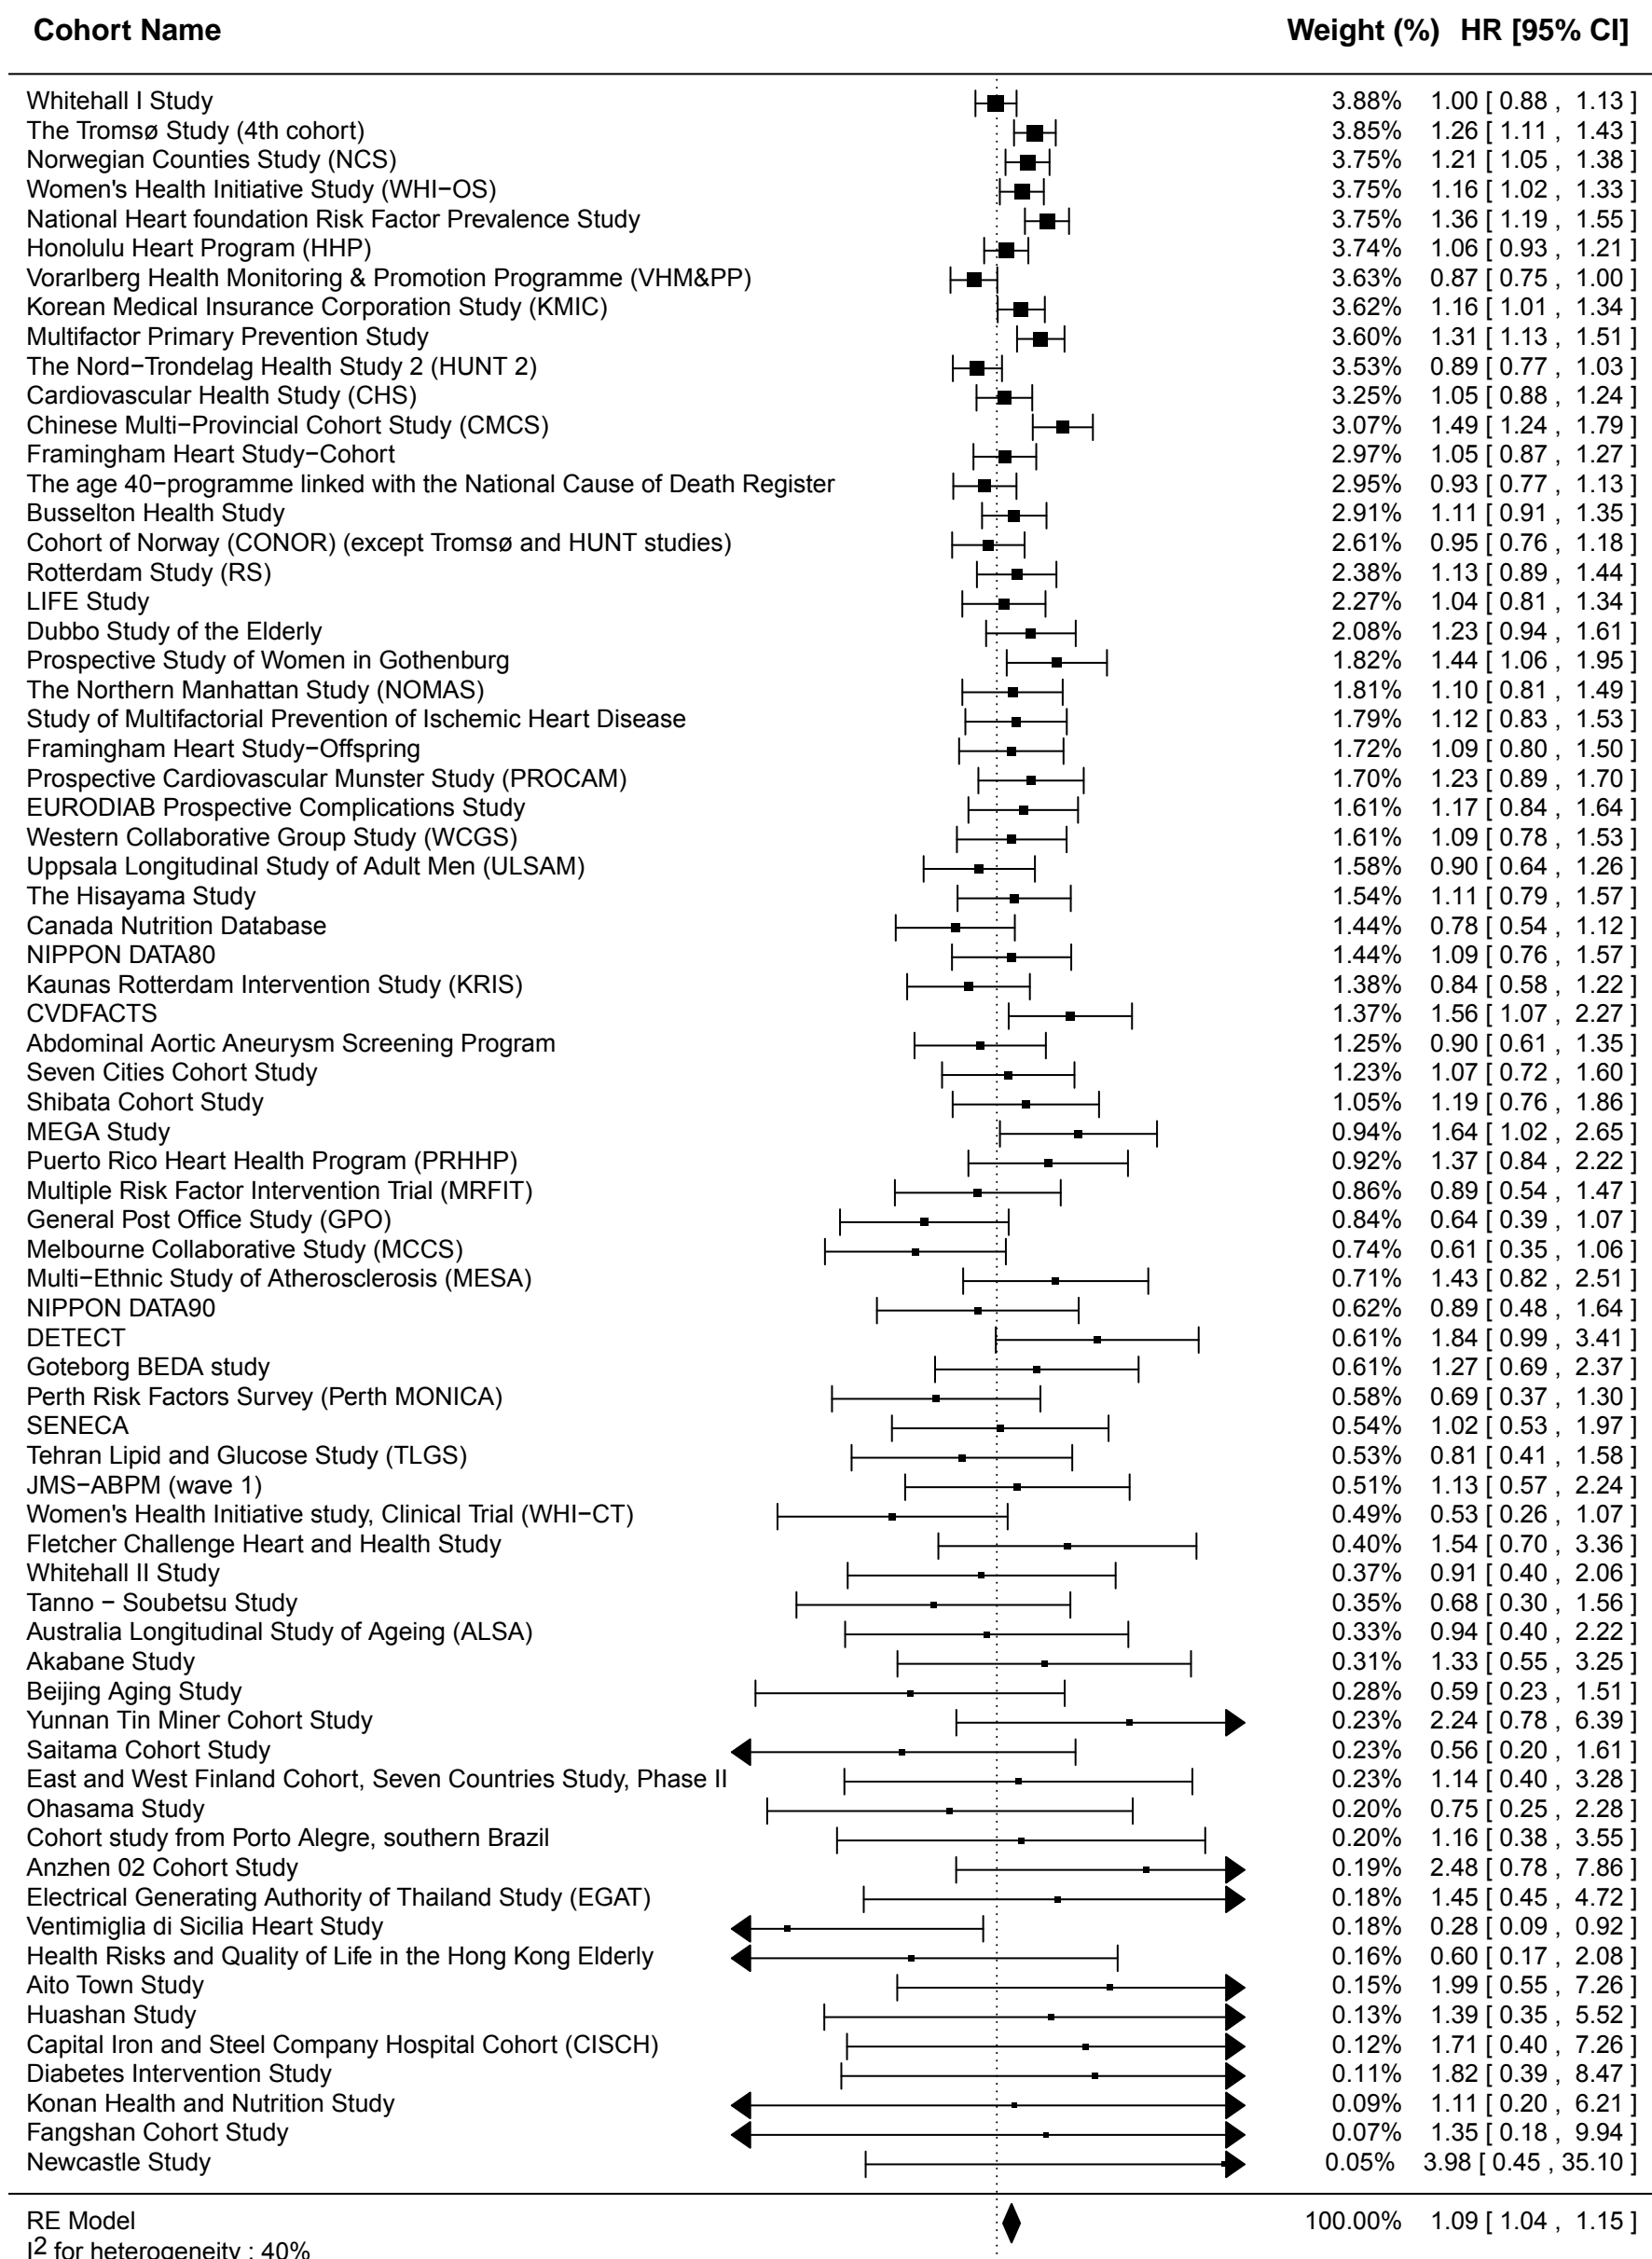

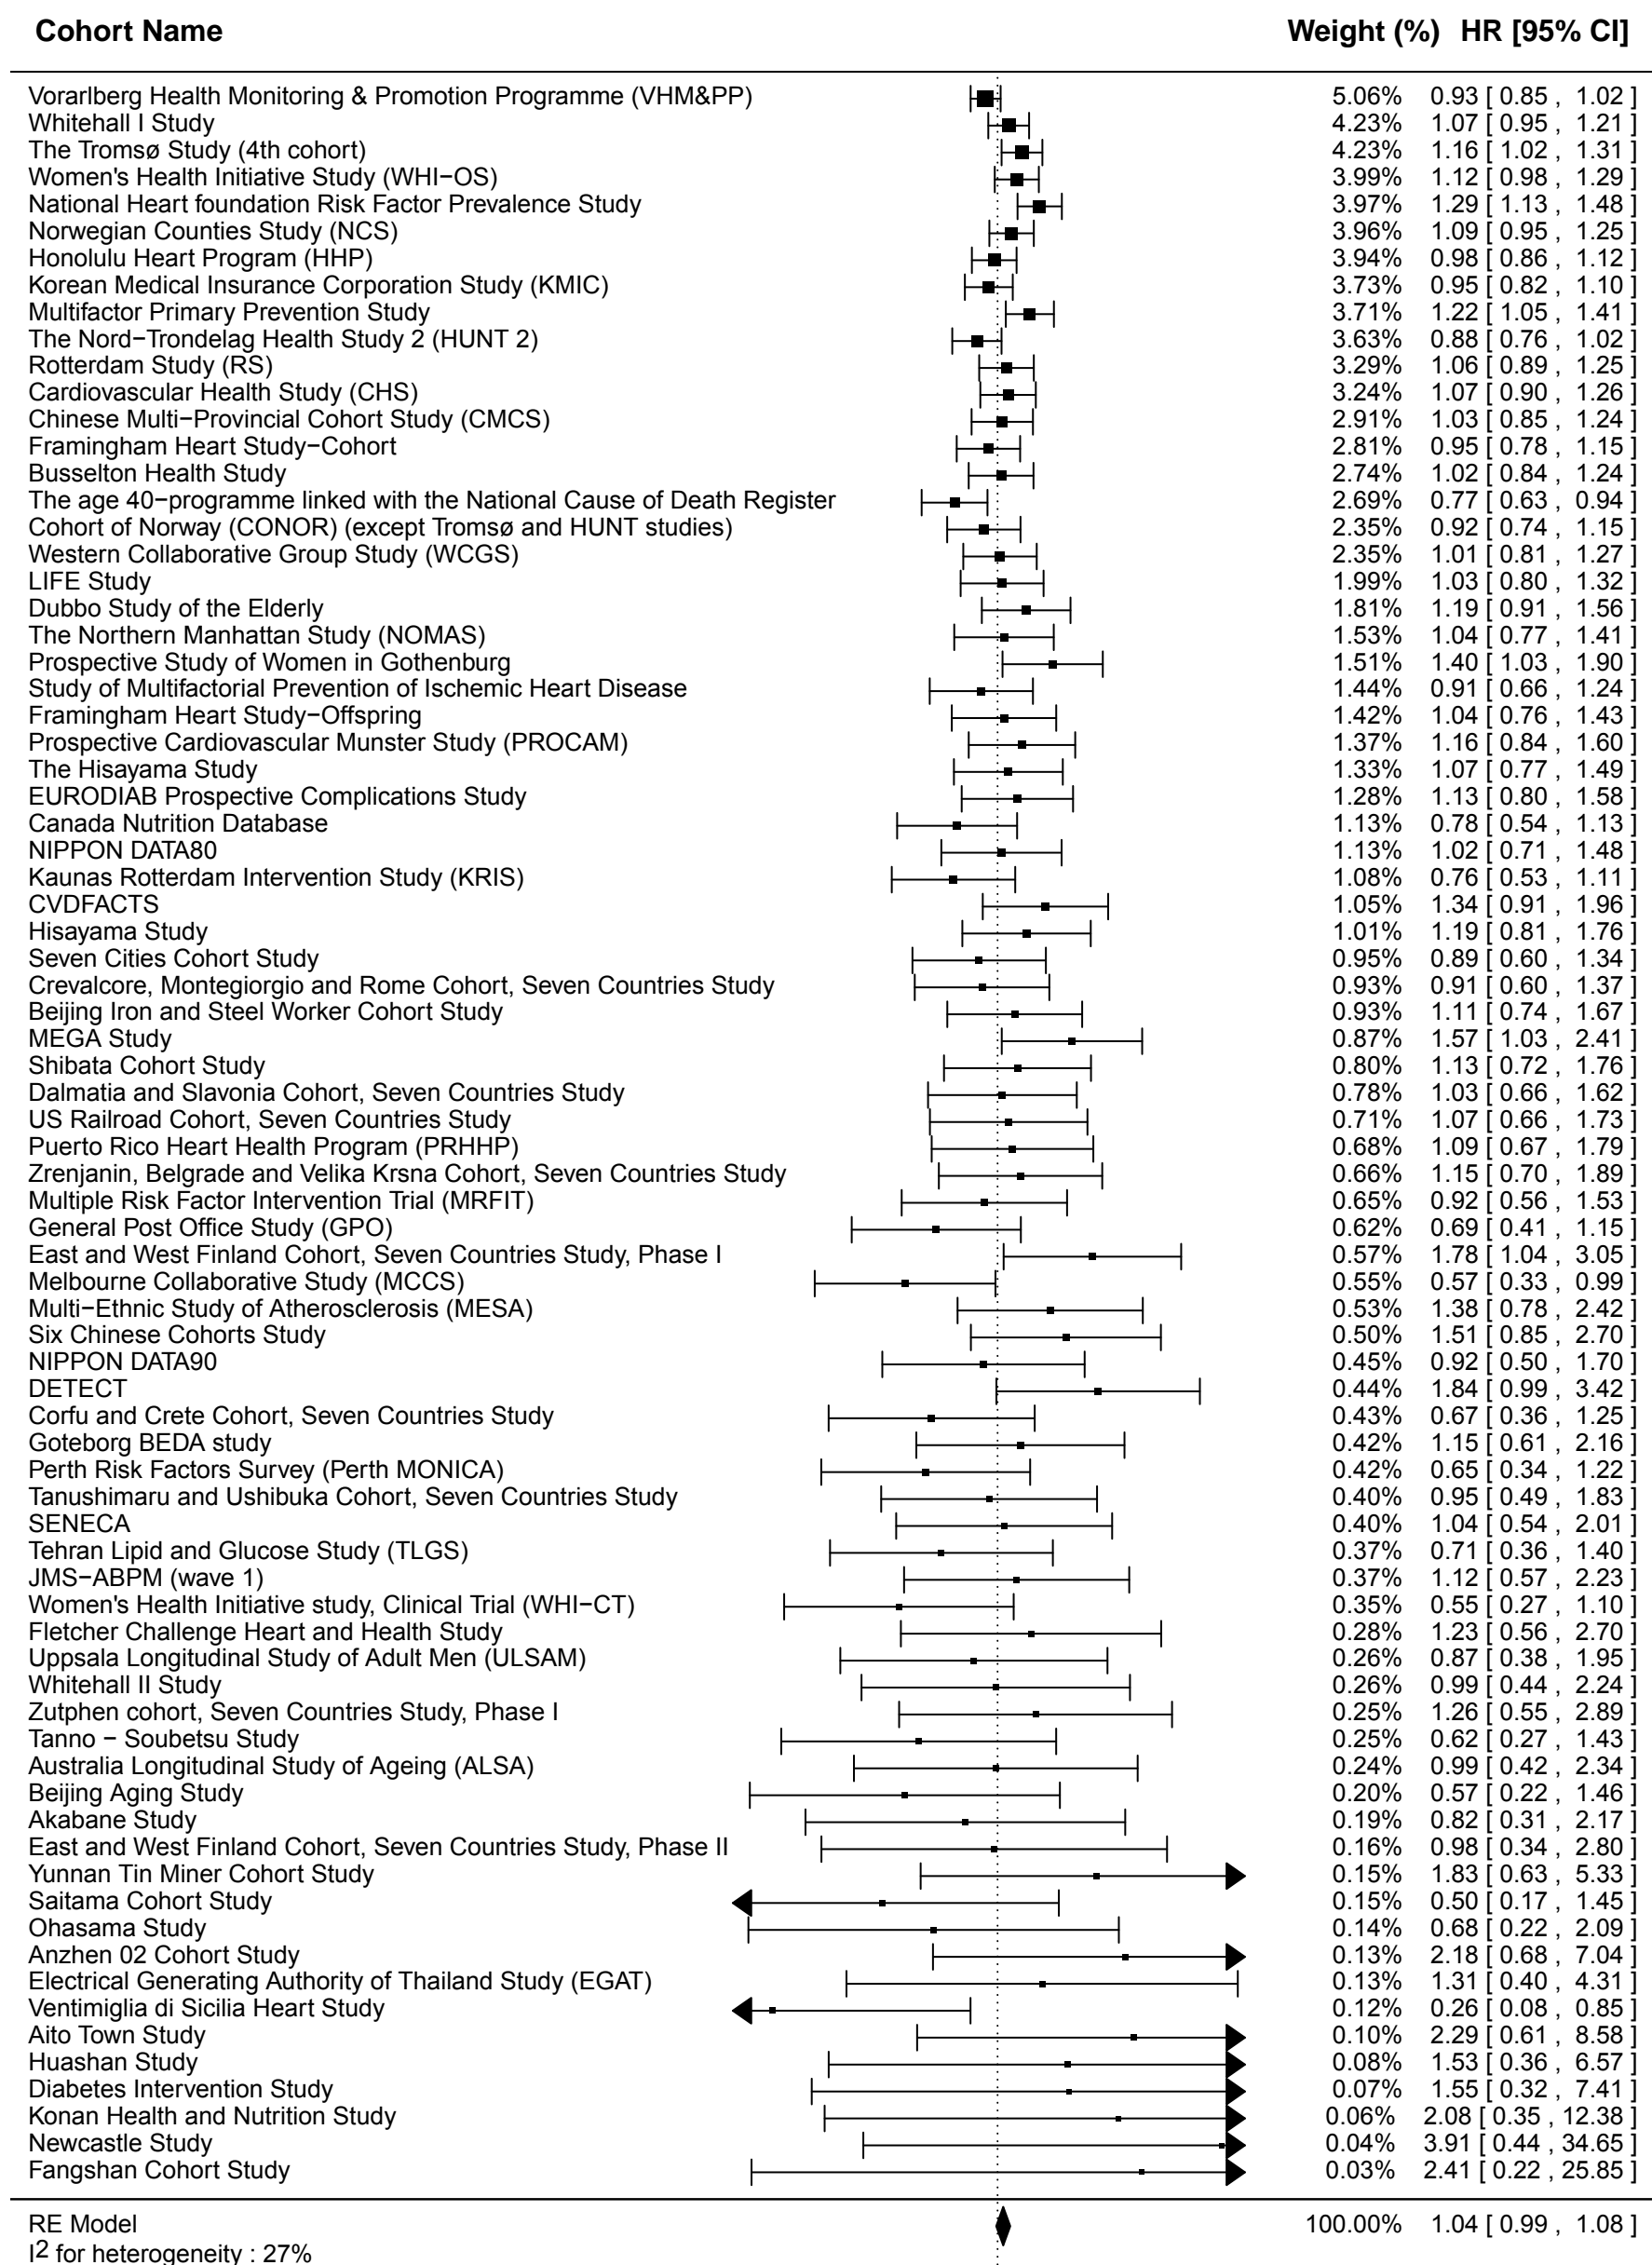

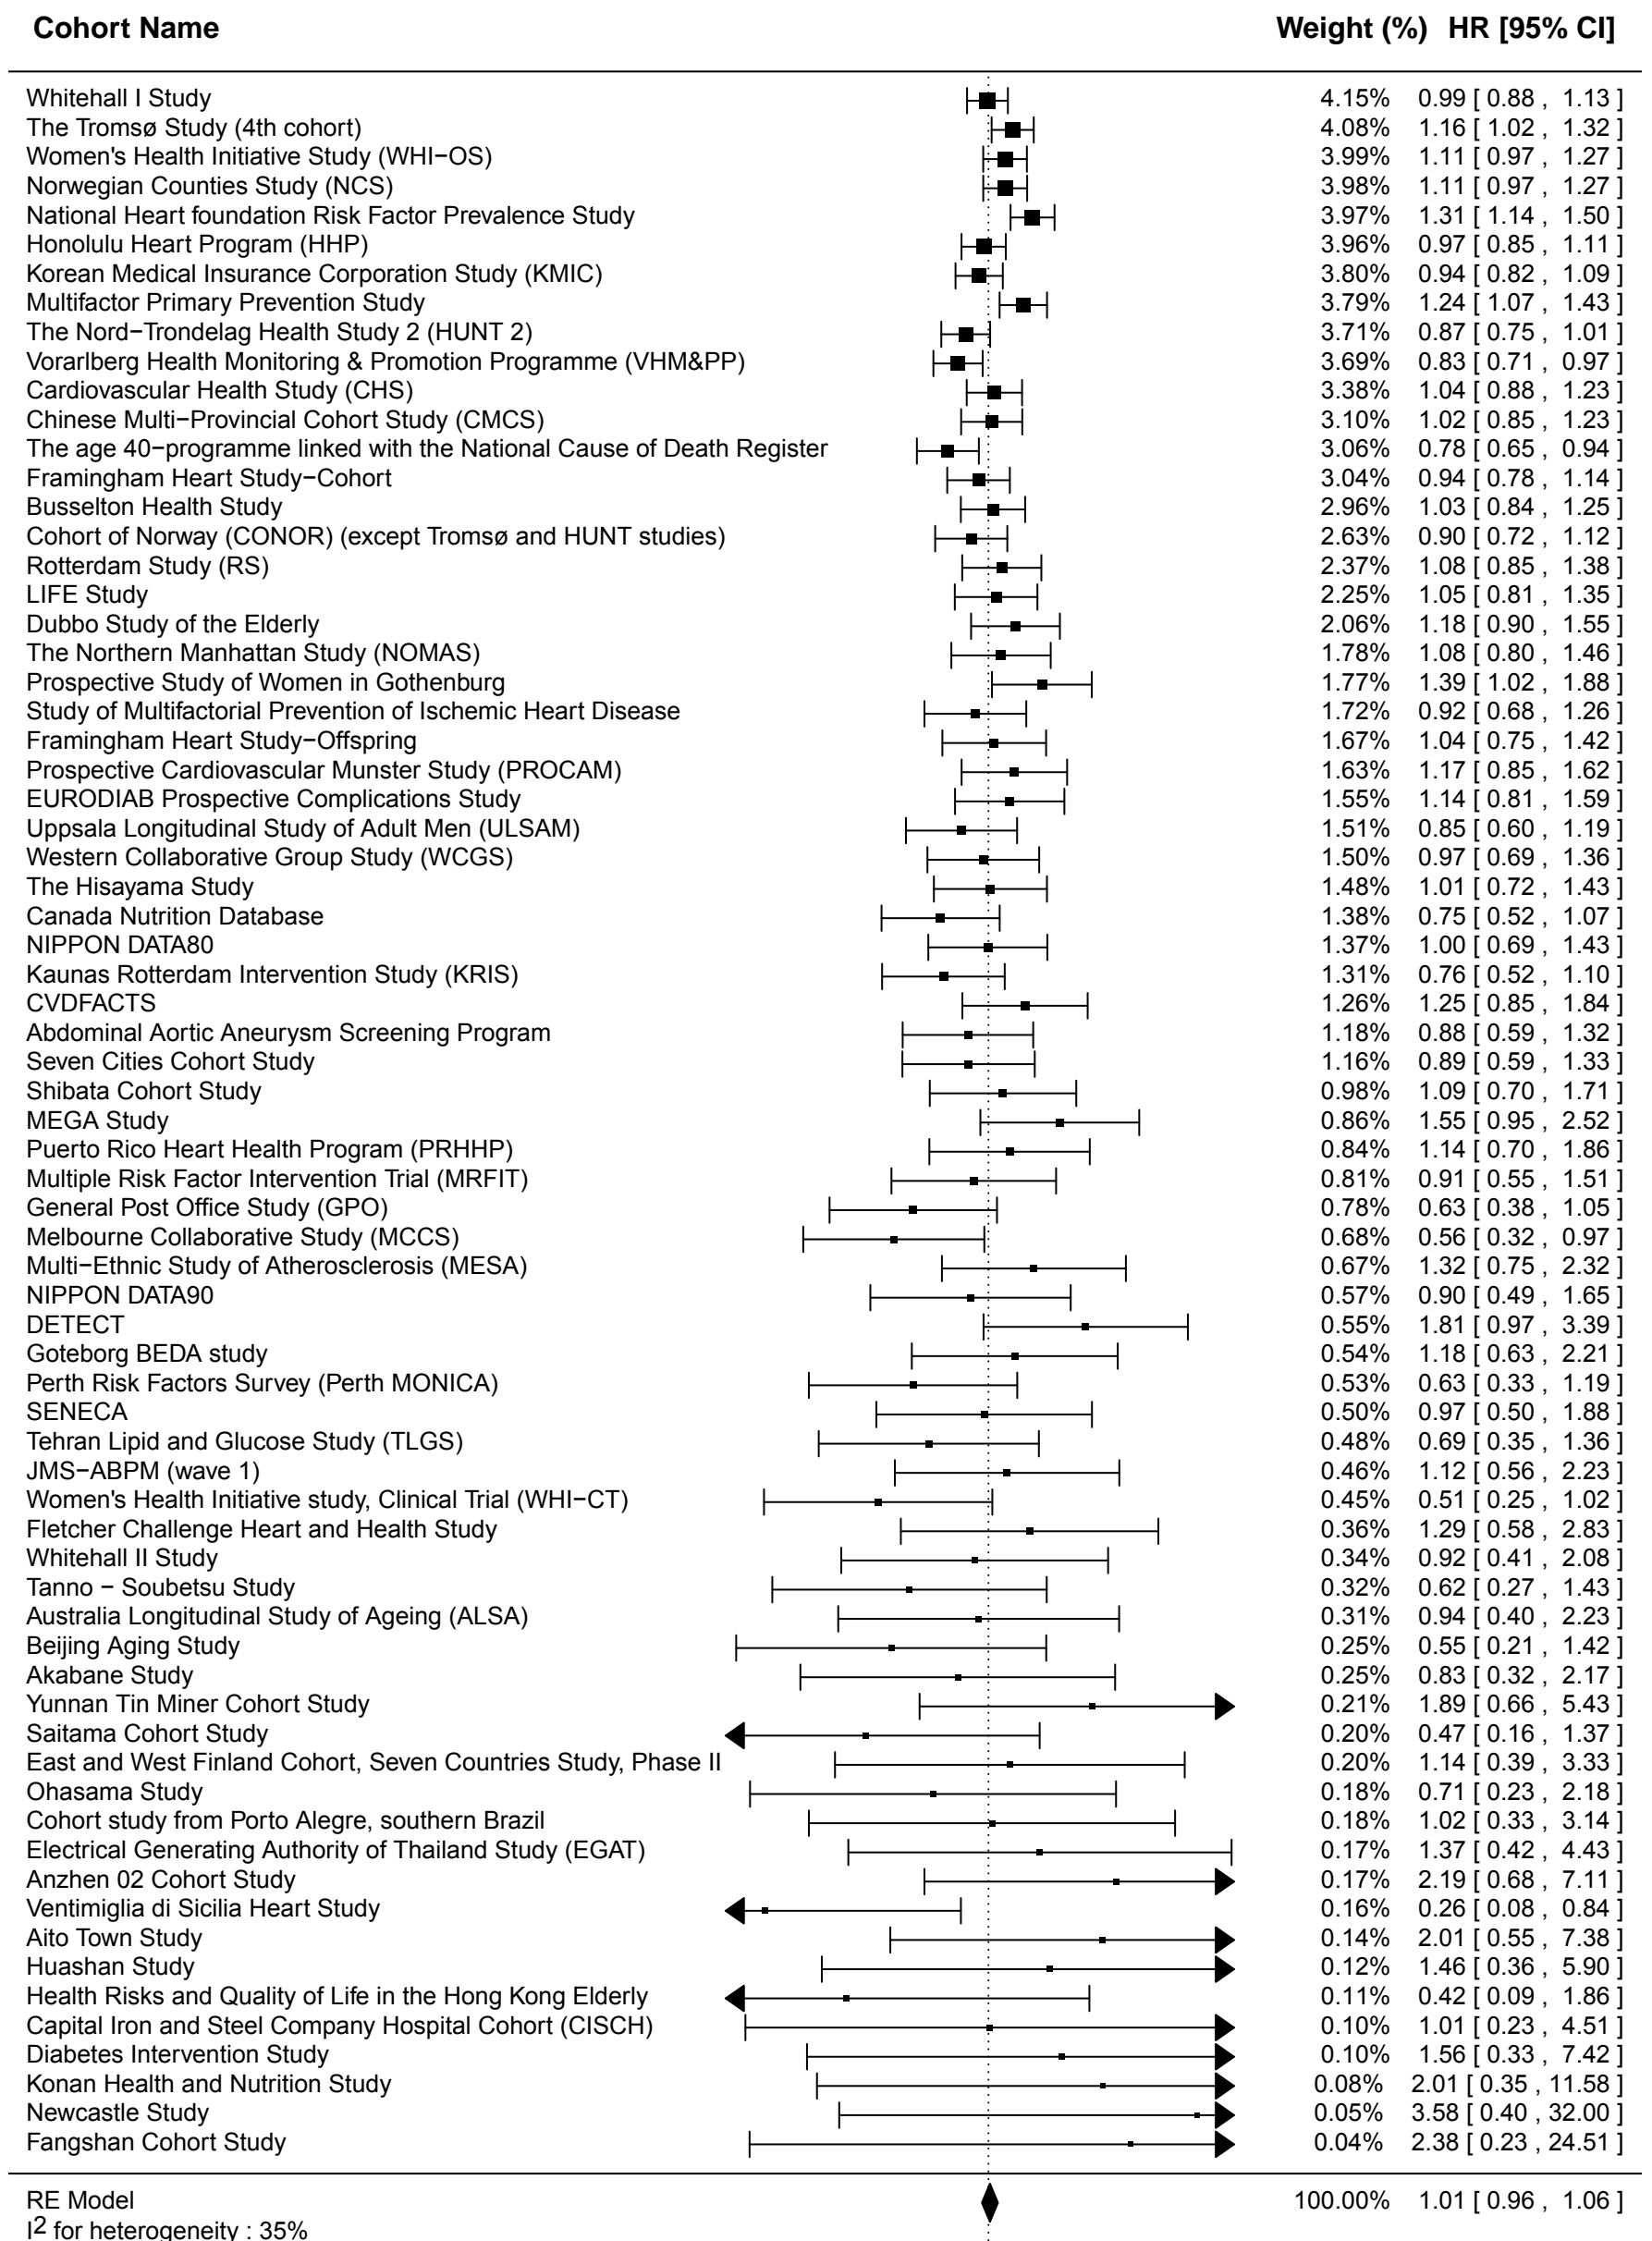

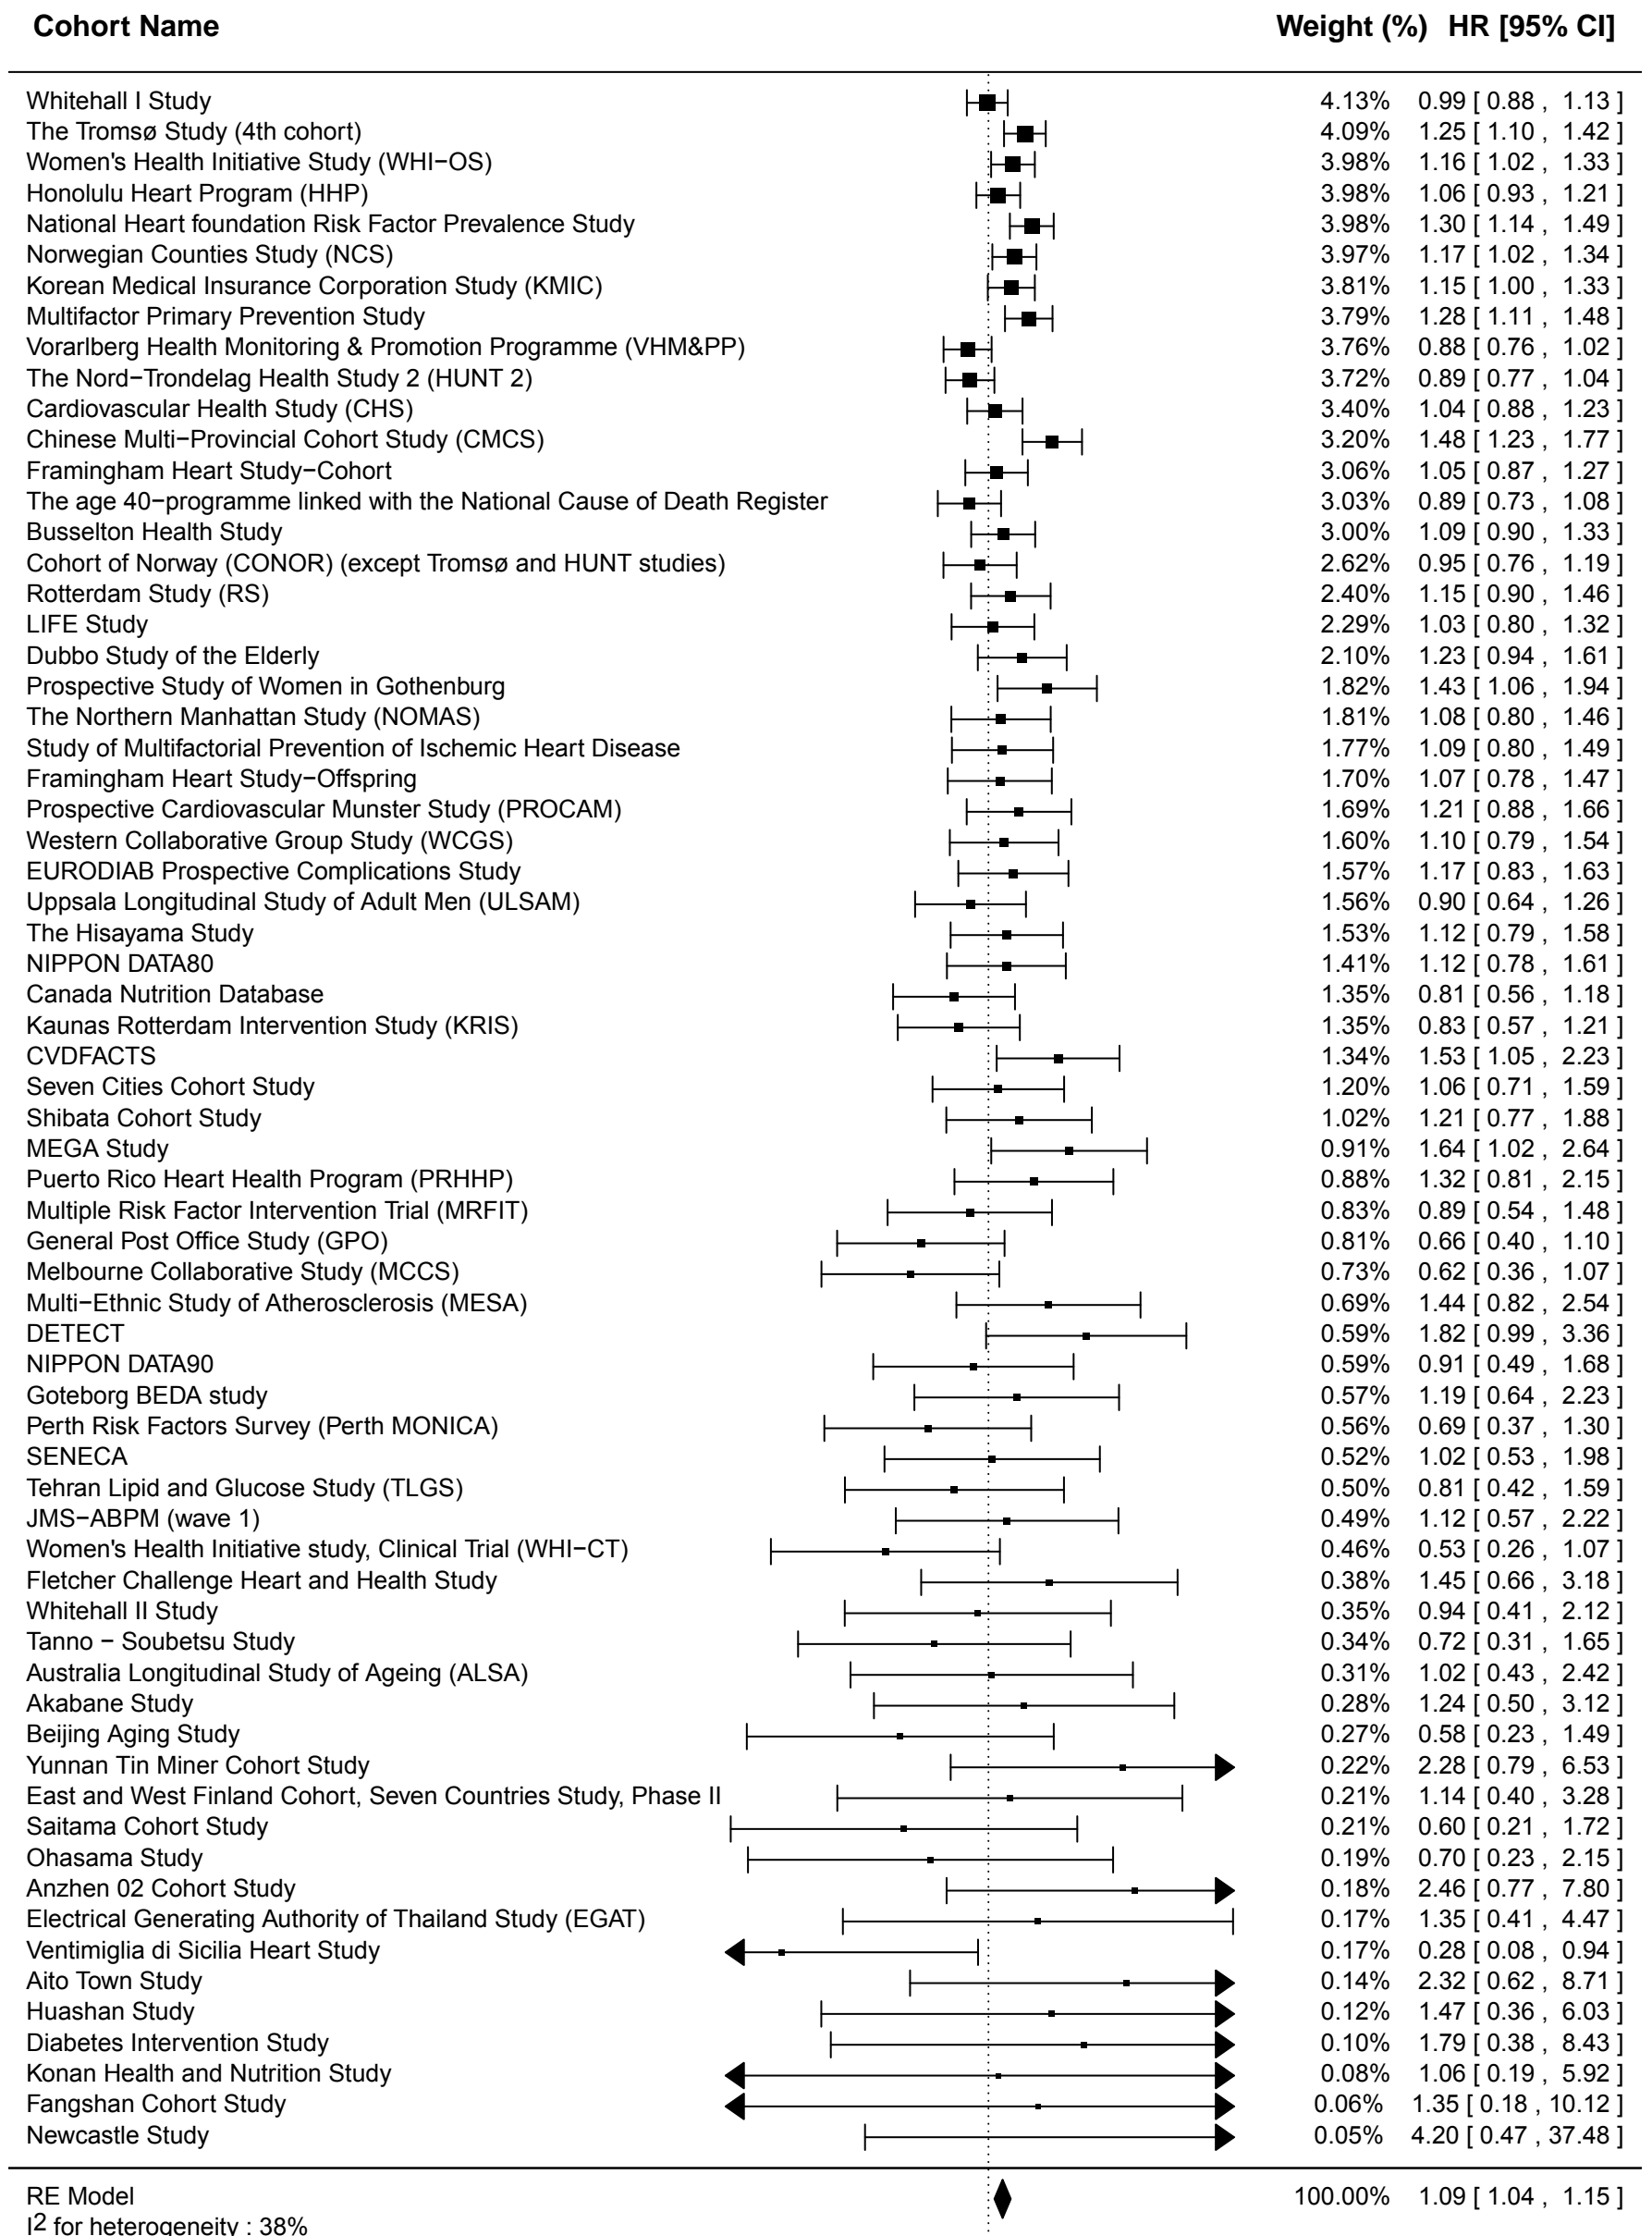

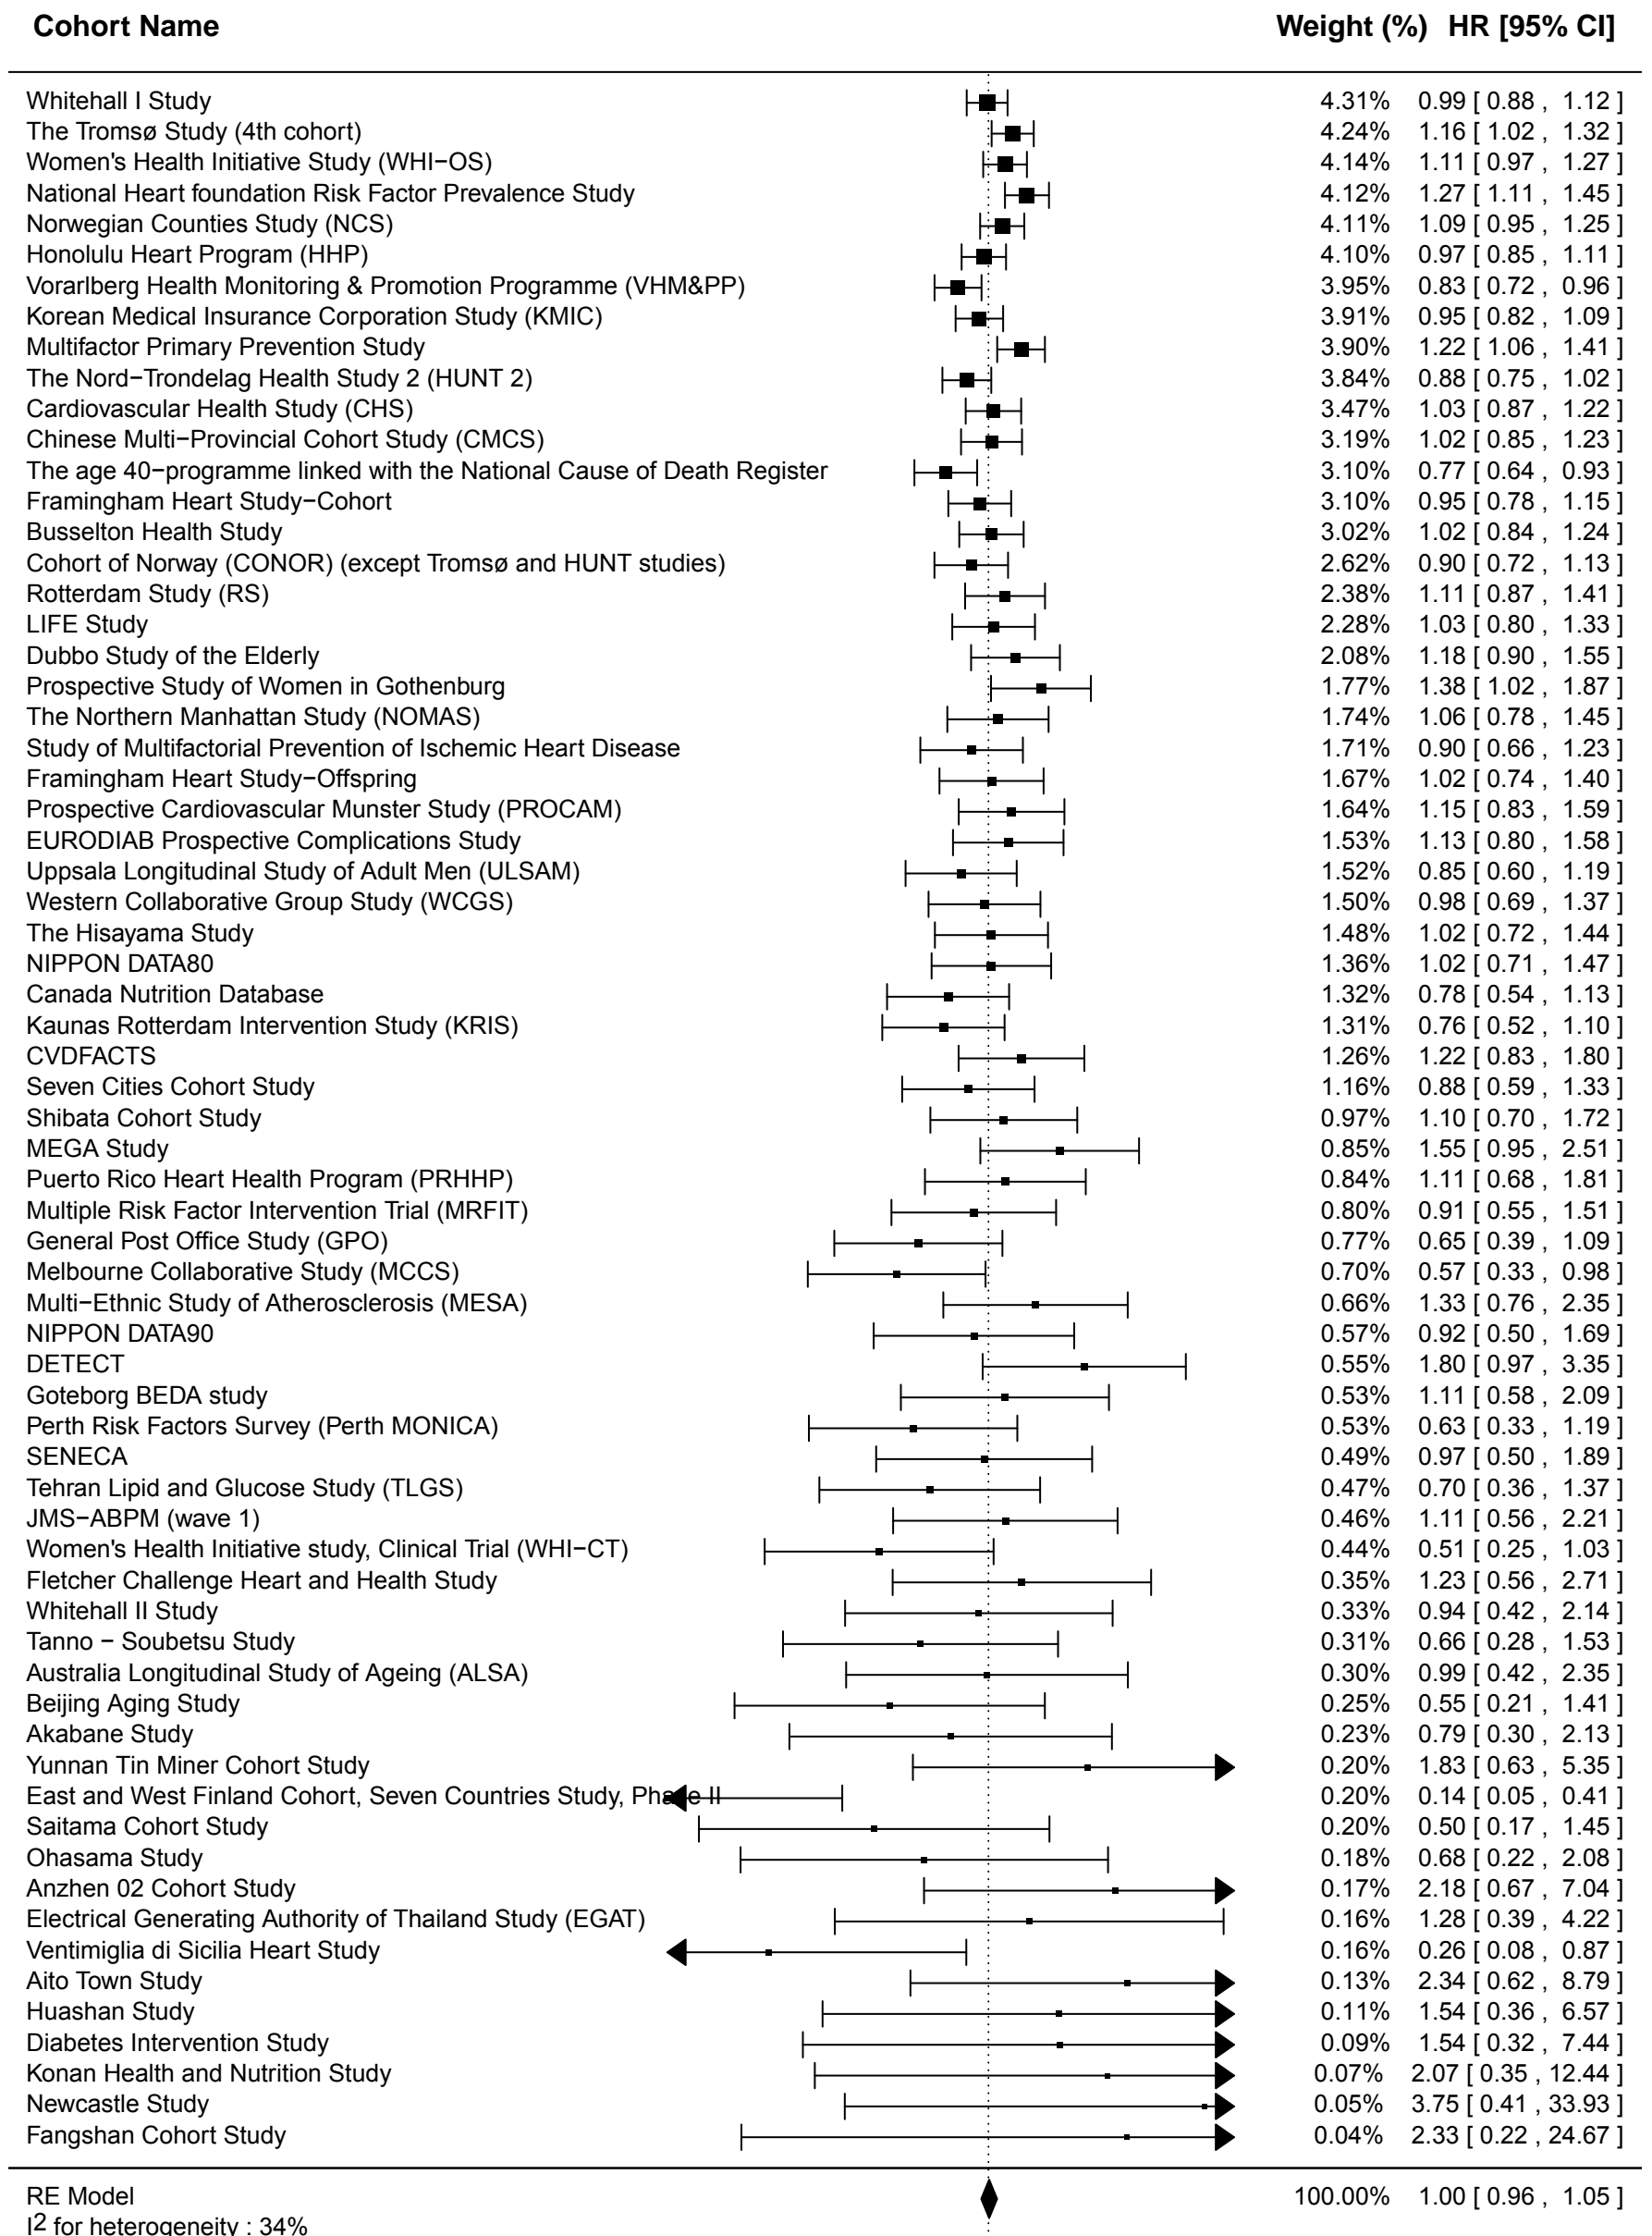

**Y gdlh wt g'6:** Cohort-specific hazard ratios (HRs) of CHD for obesity vs. normal weight.

(Some cohorts that had BMI continuously did not have sufficient events in this BMI range for categorical analysis.)



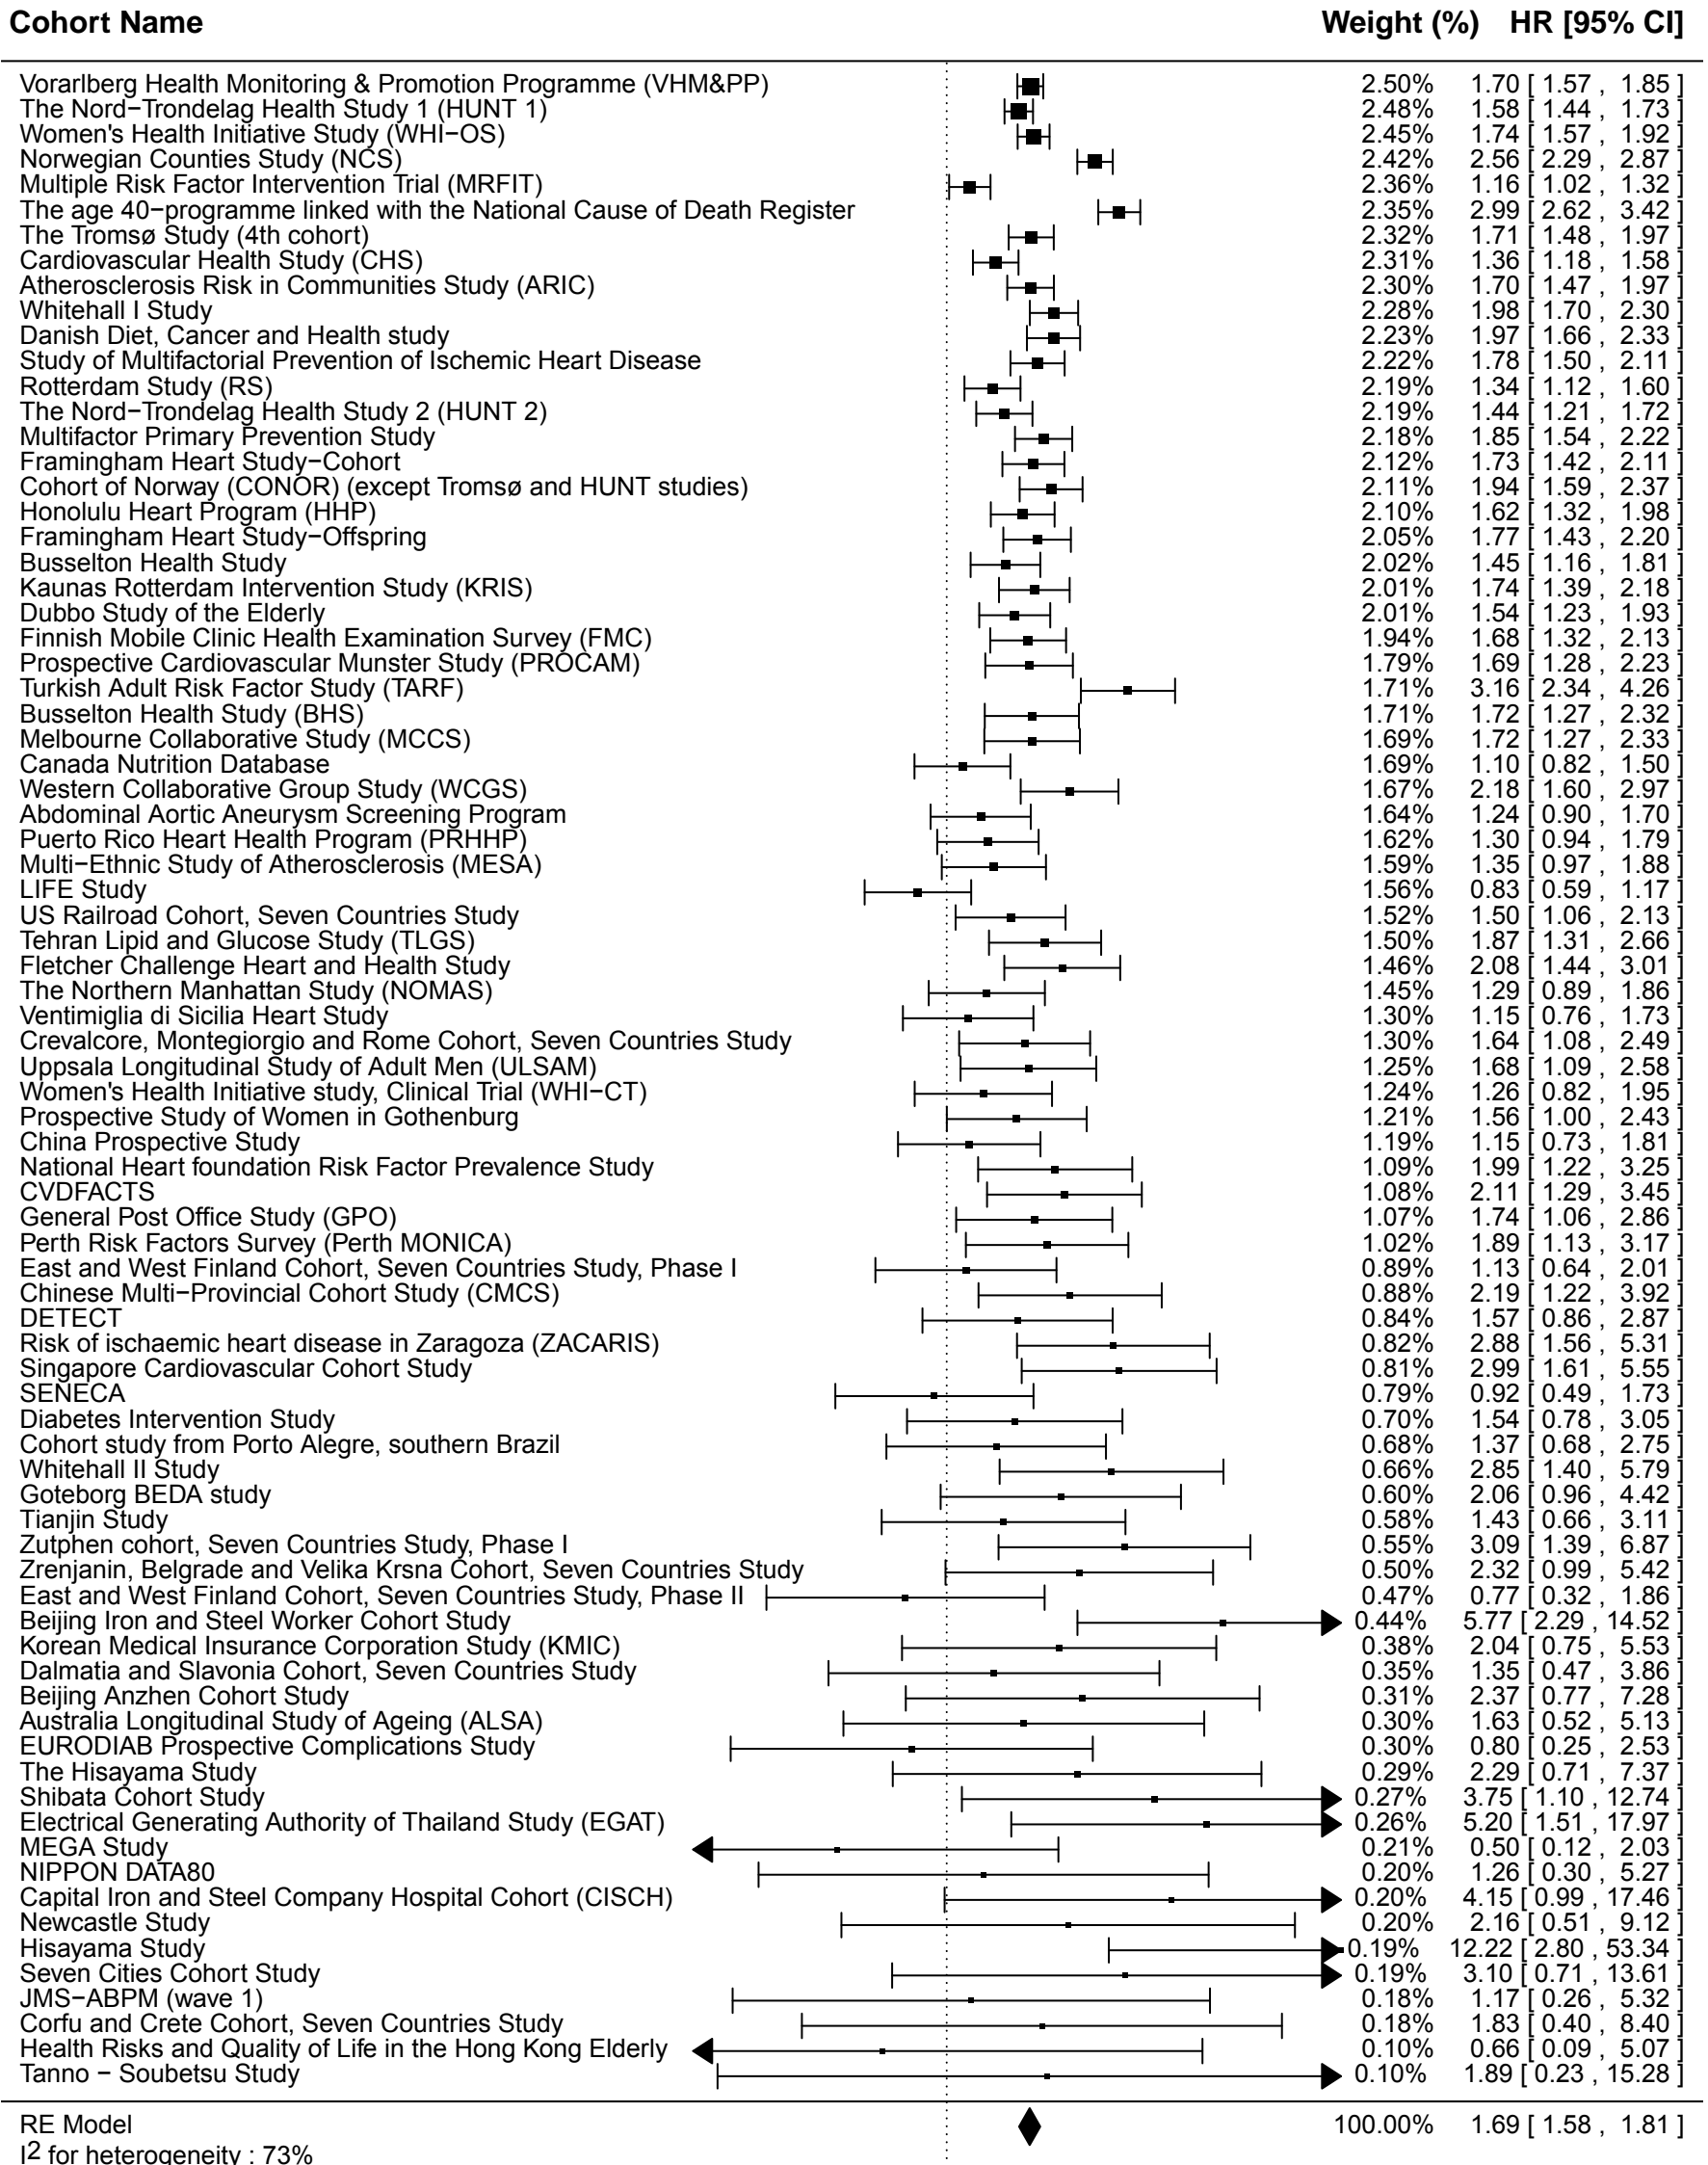

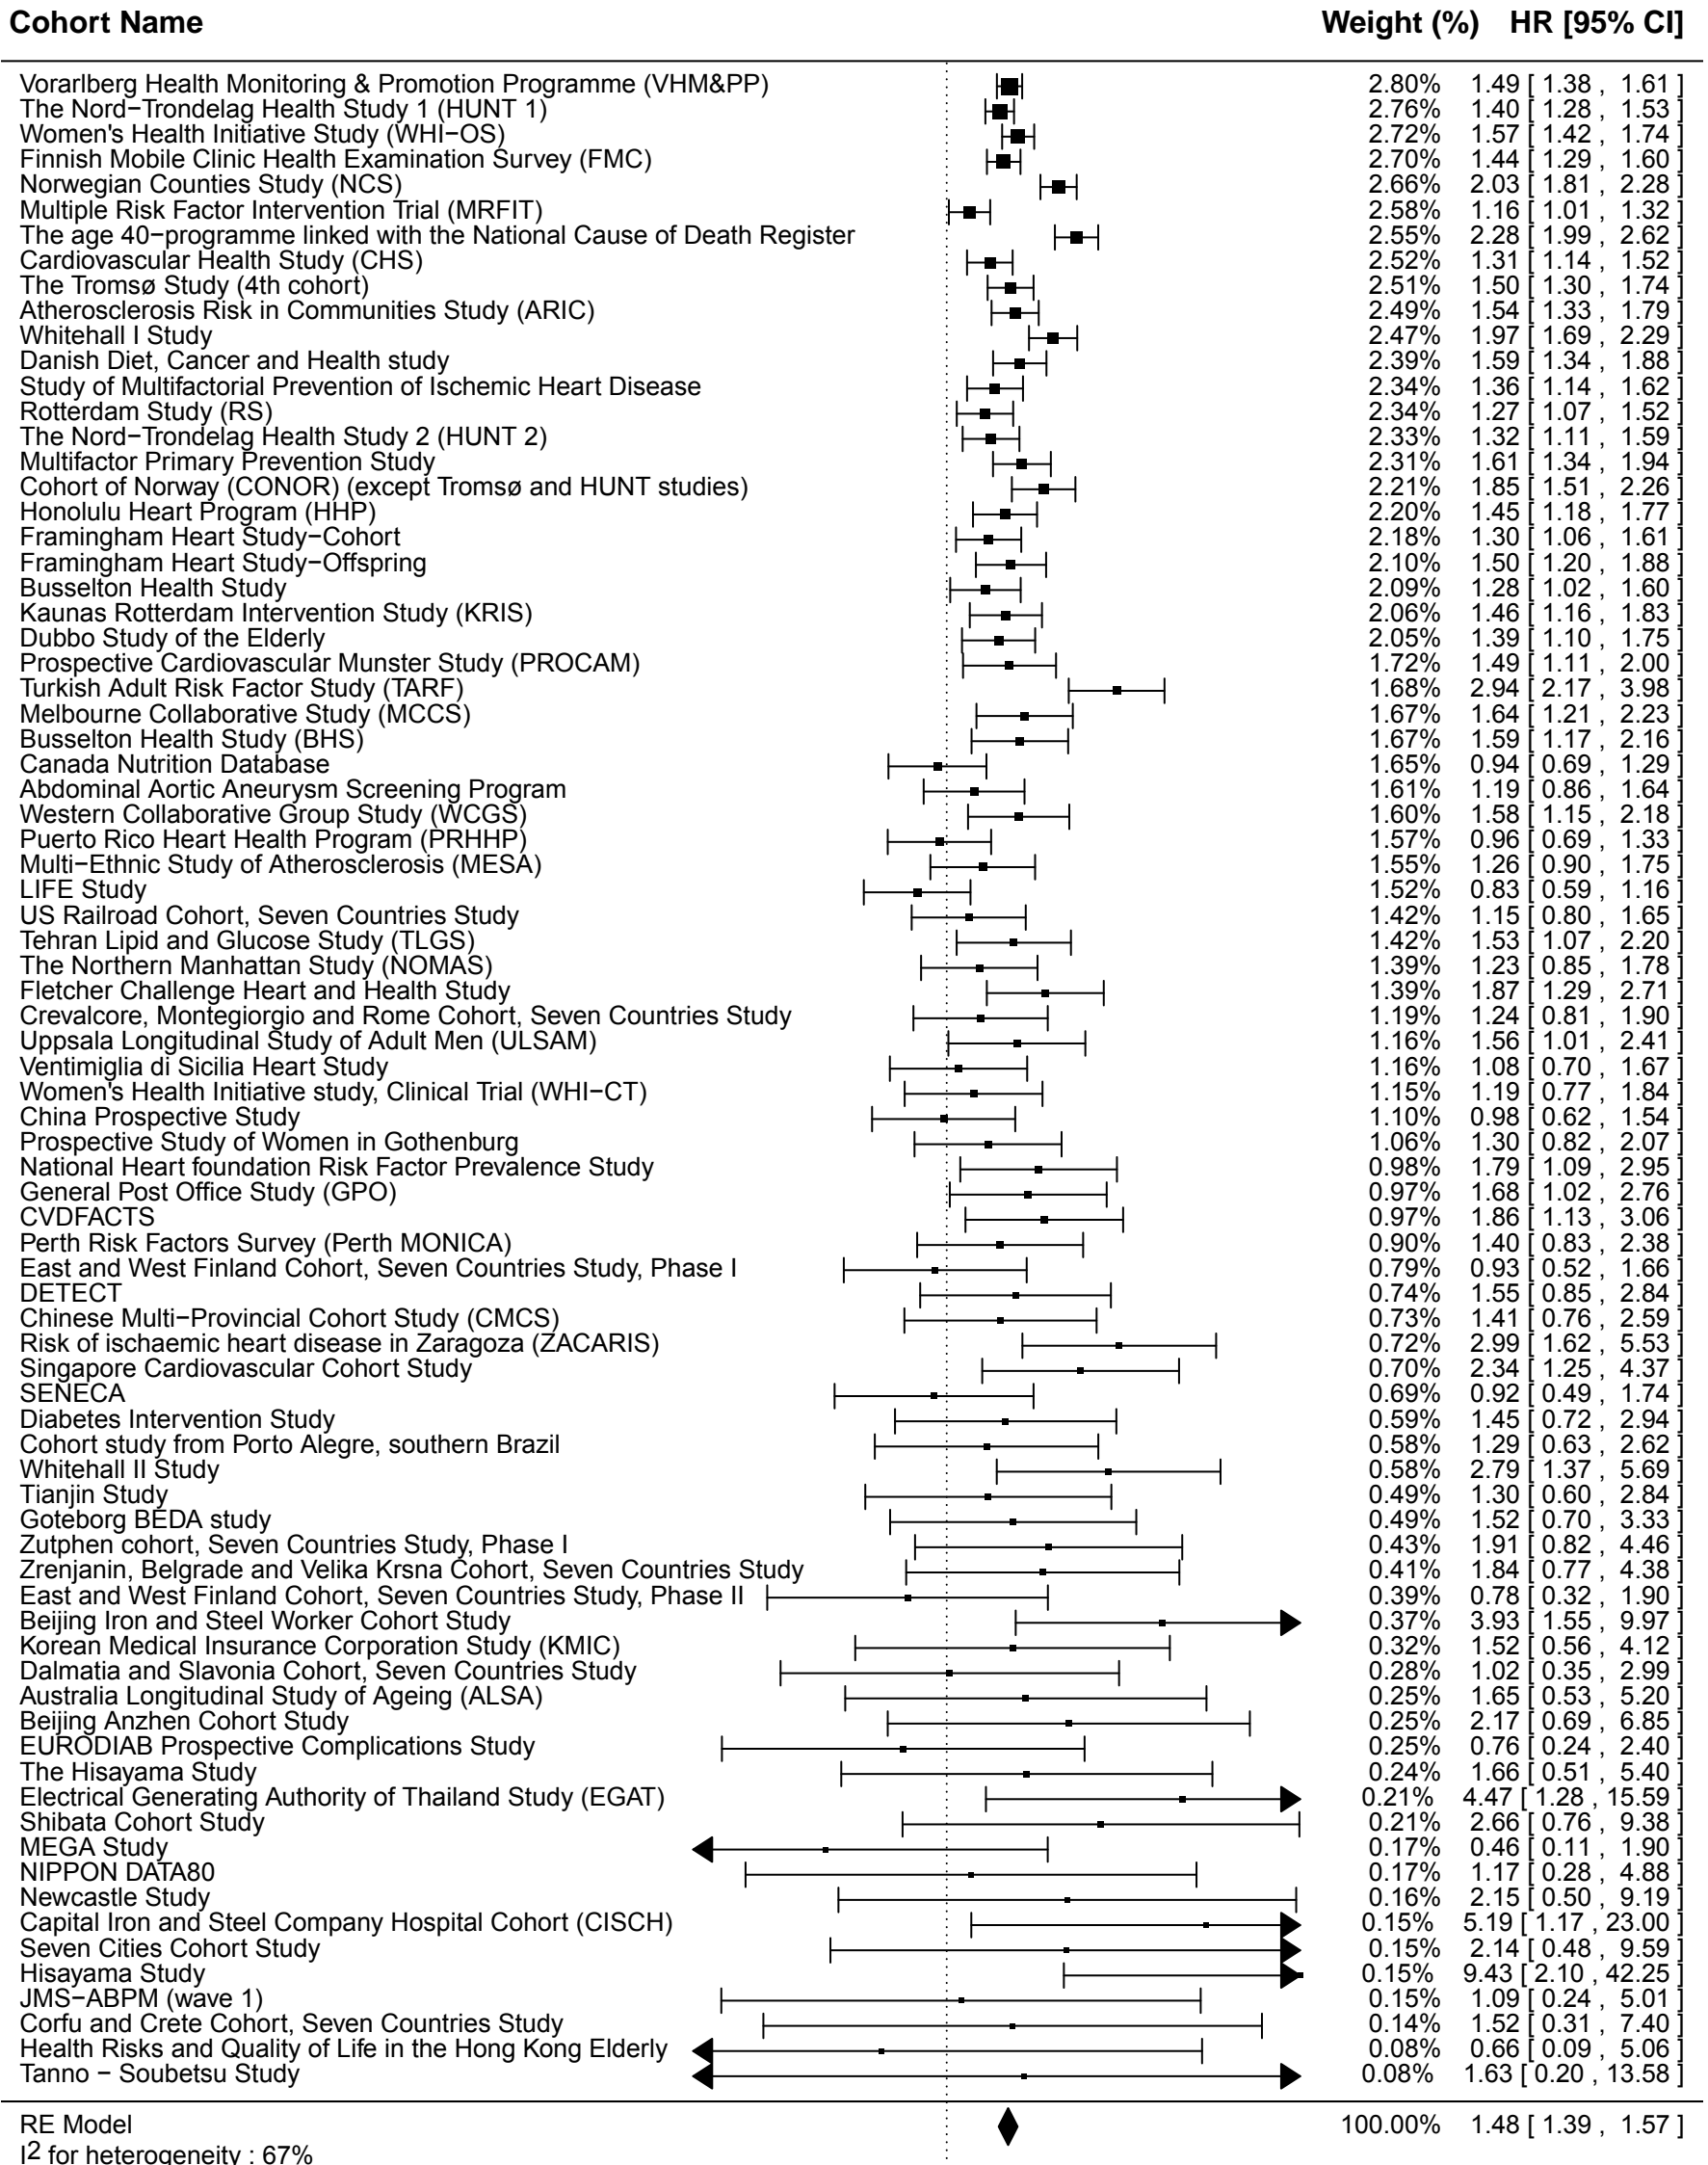

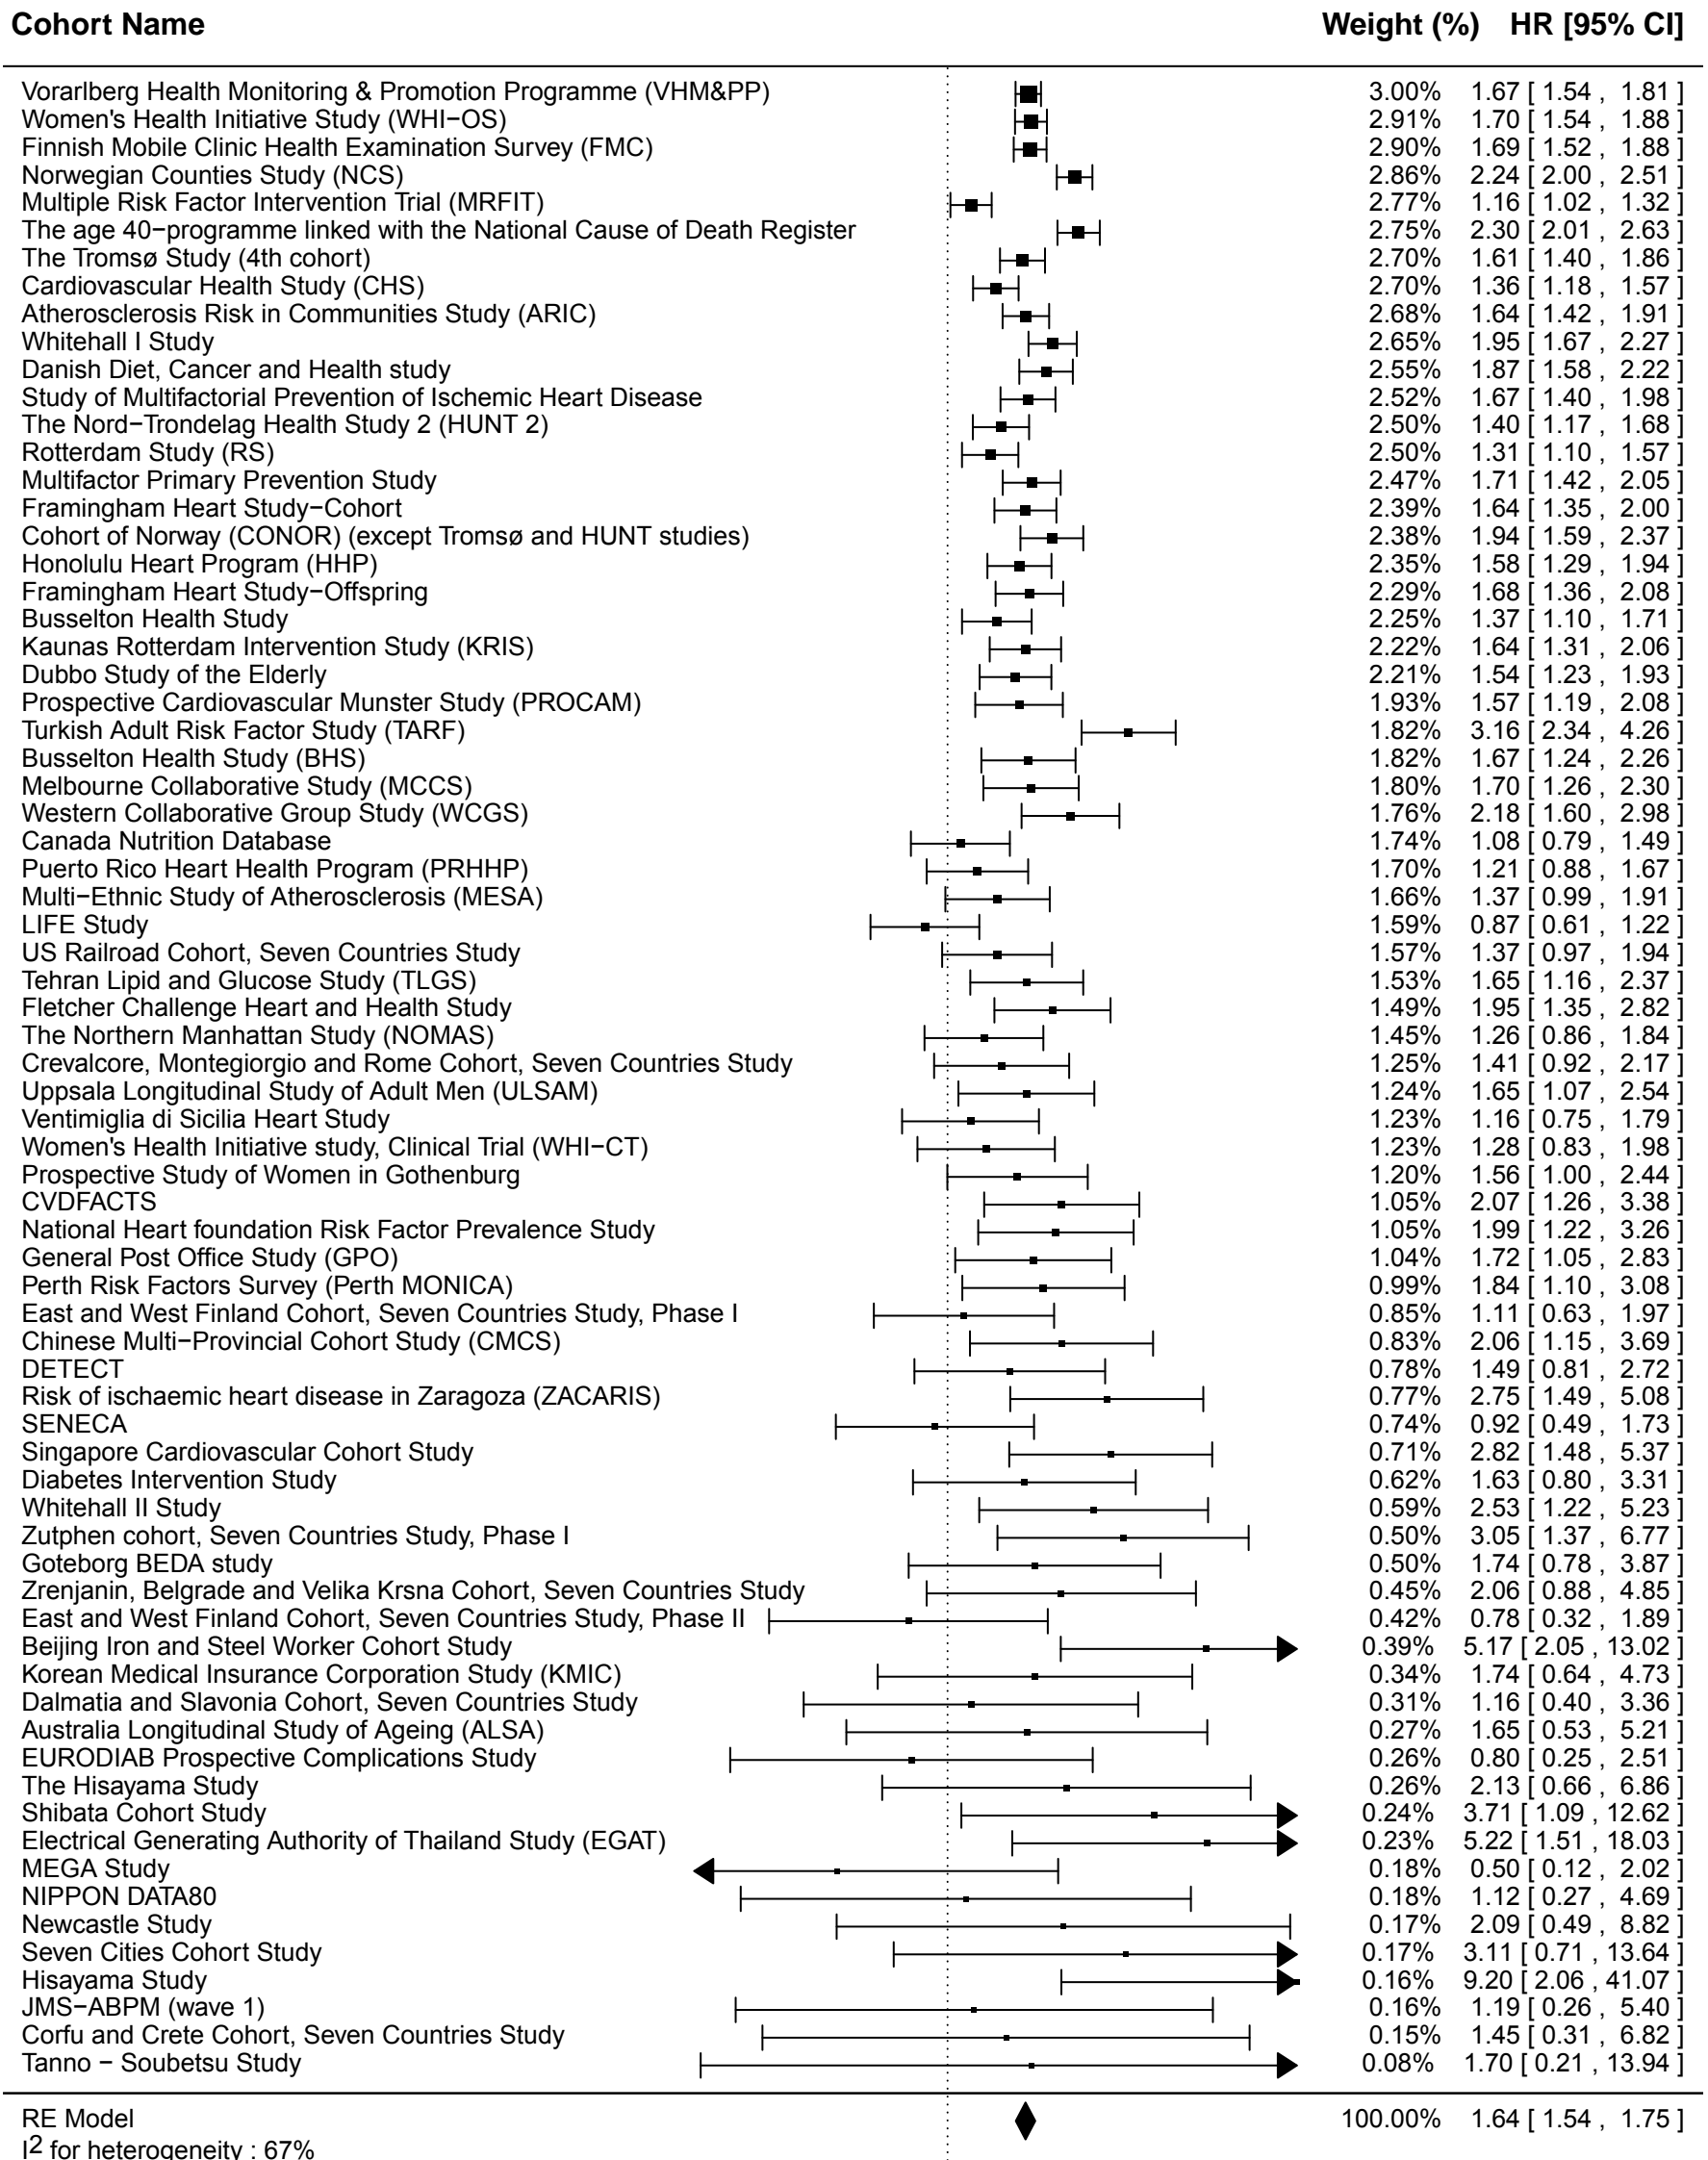

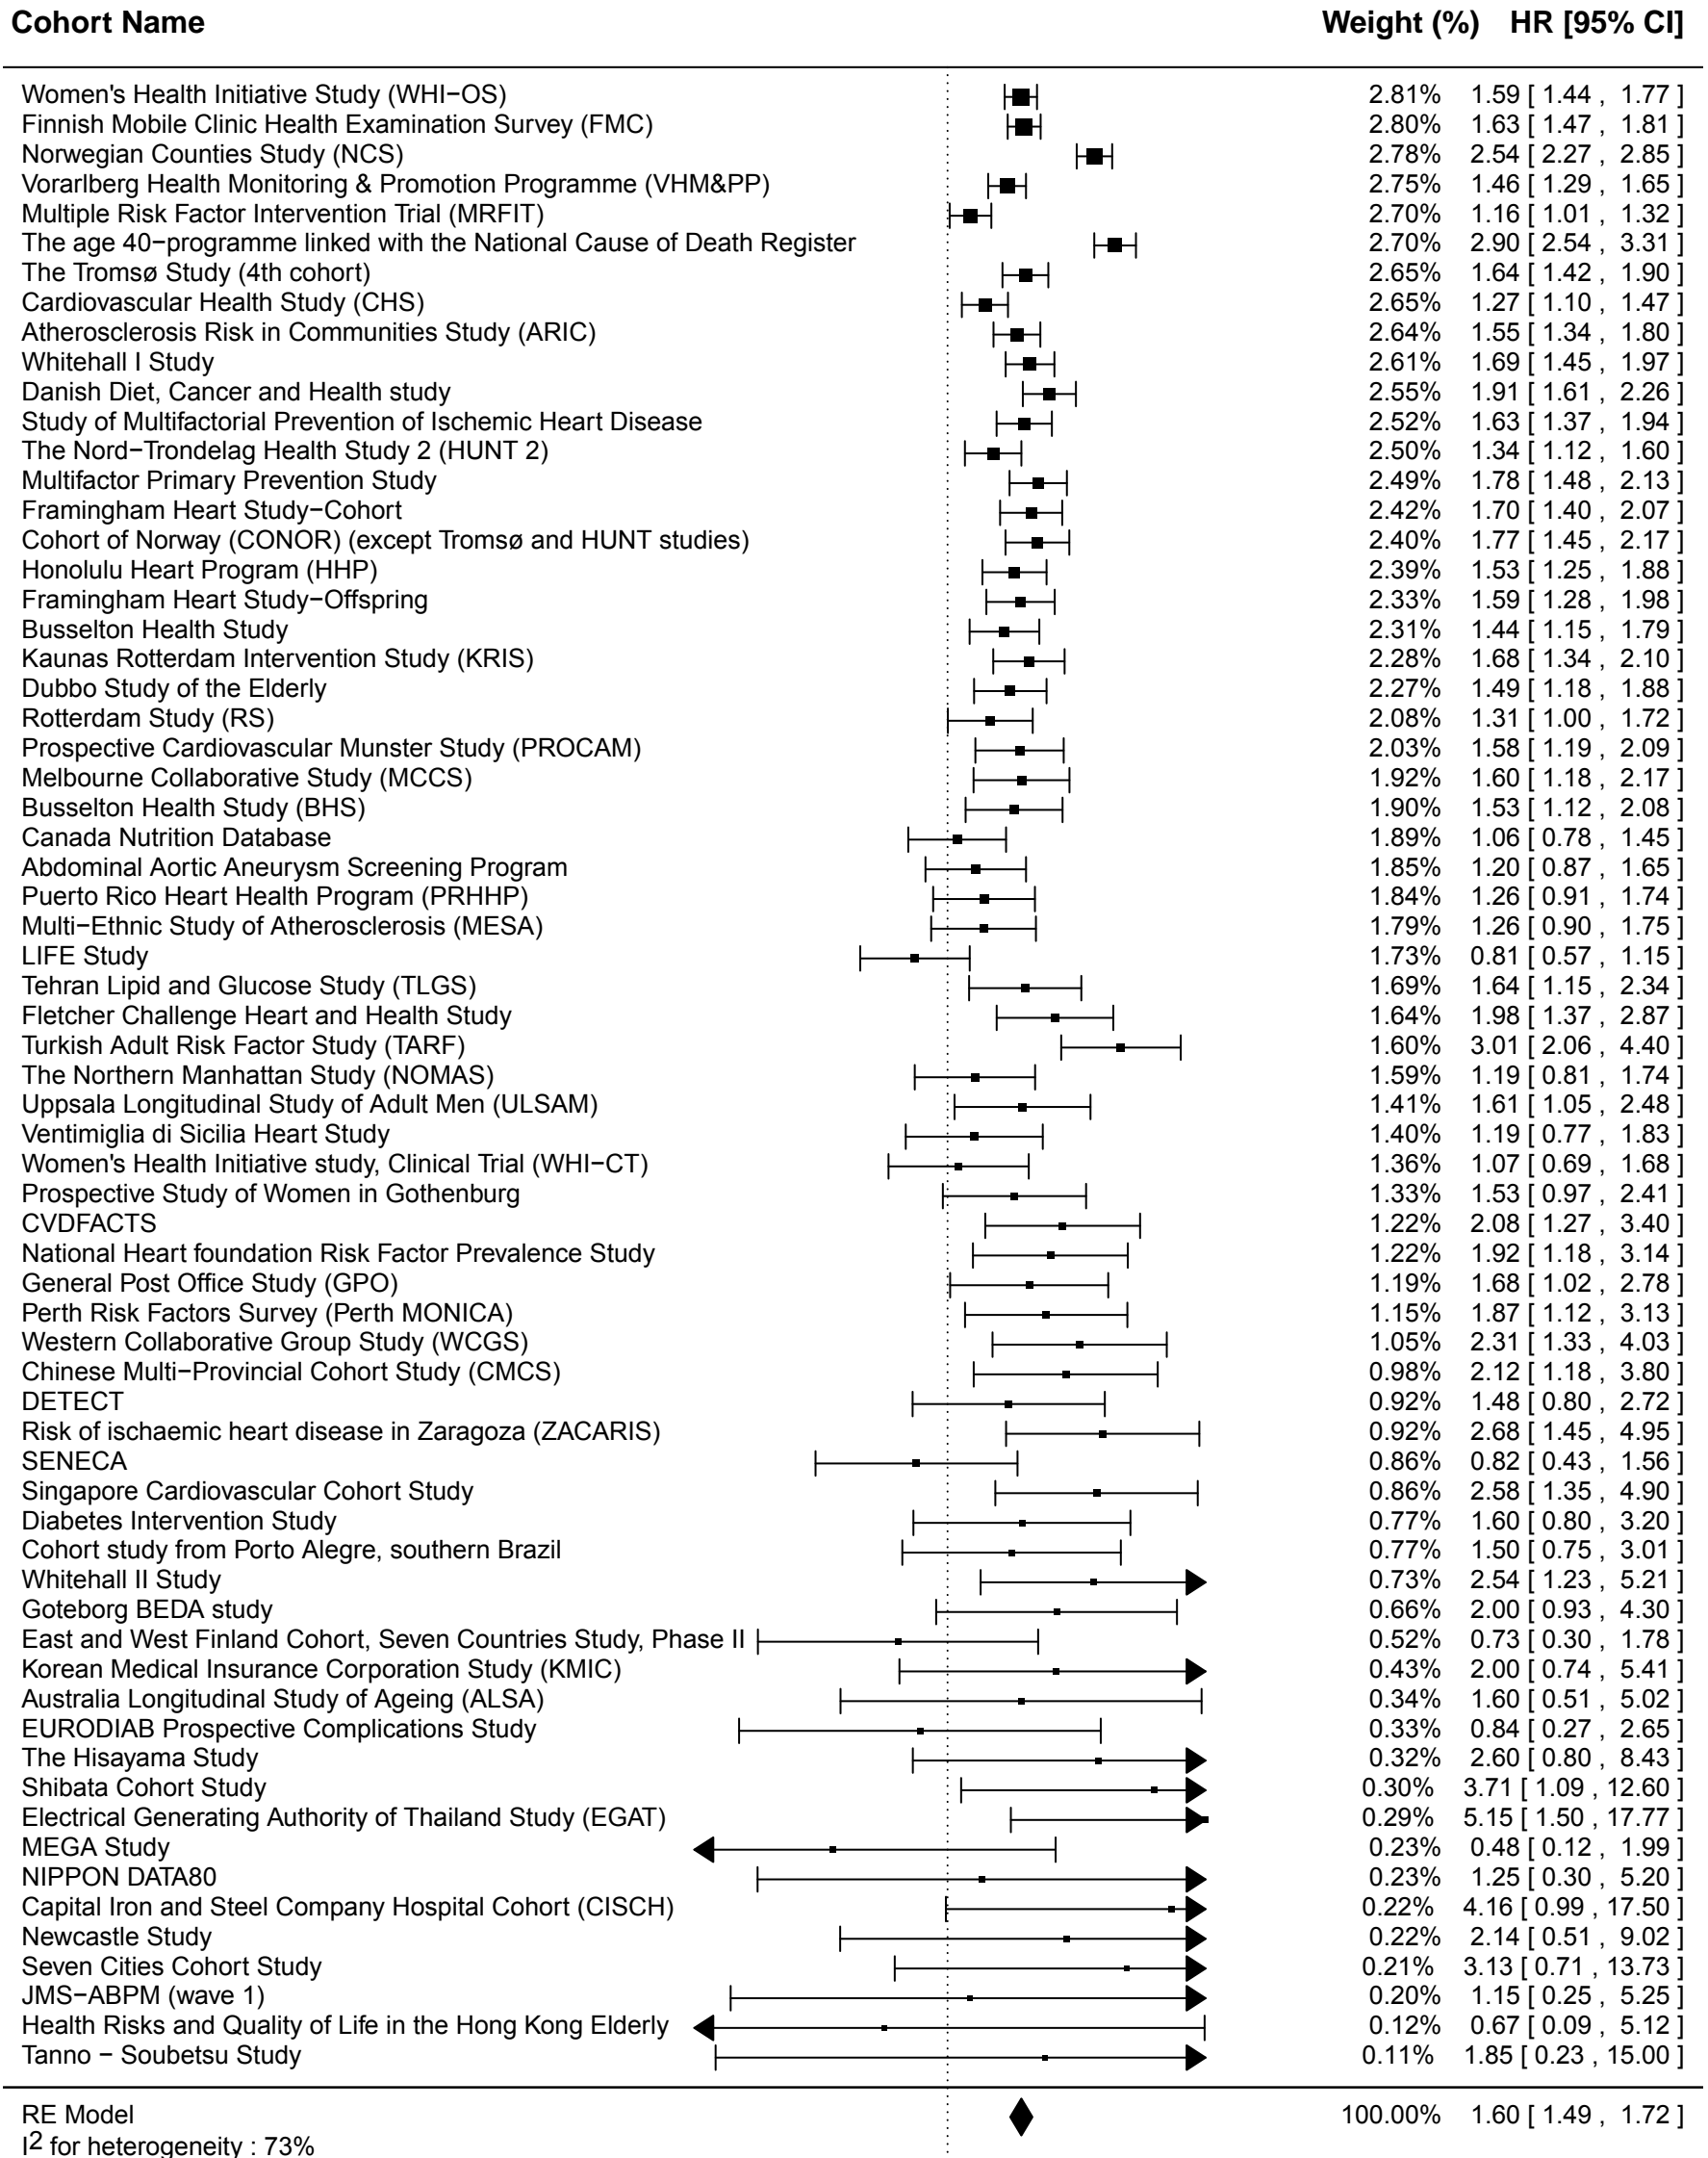

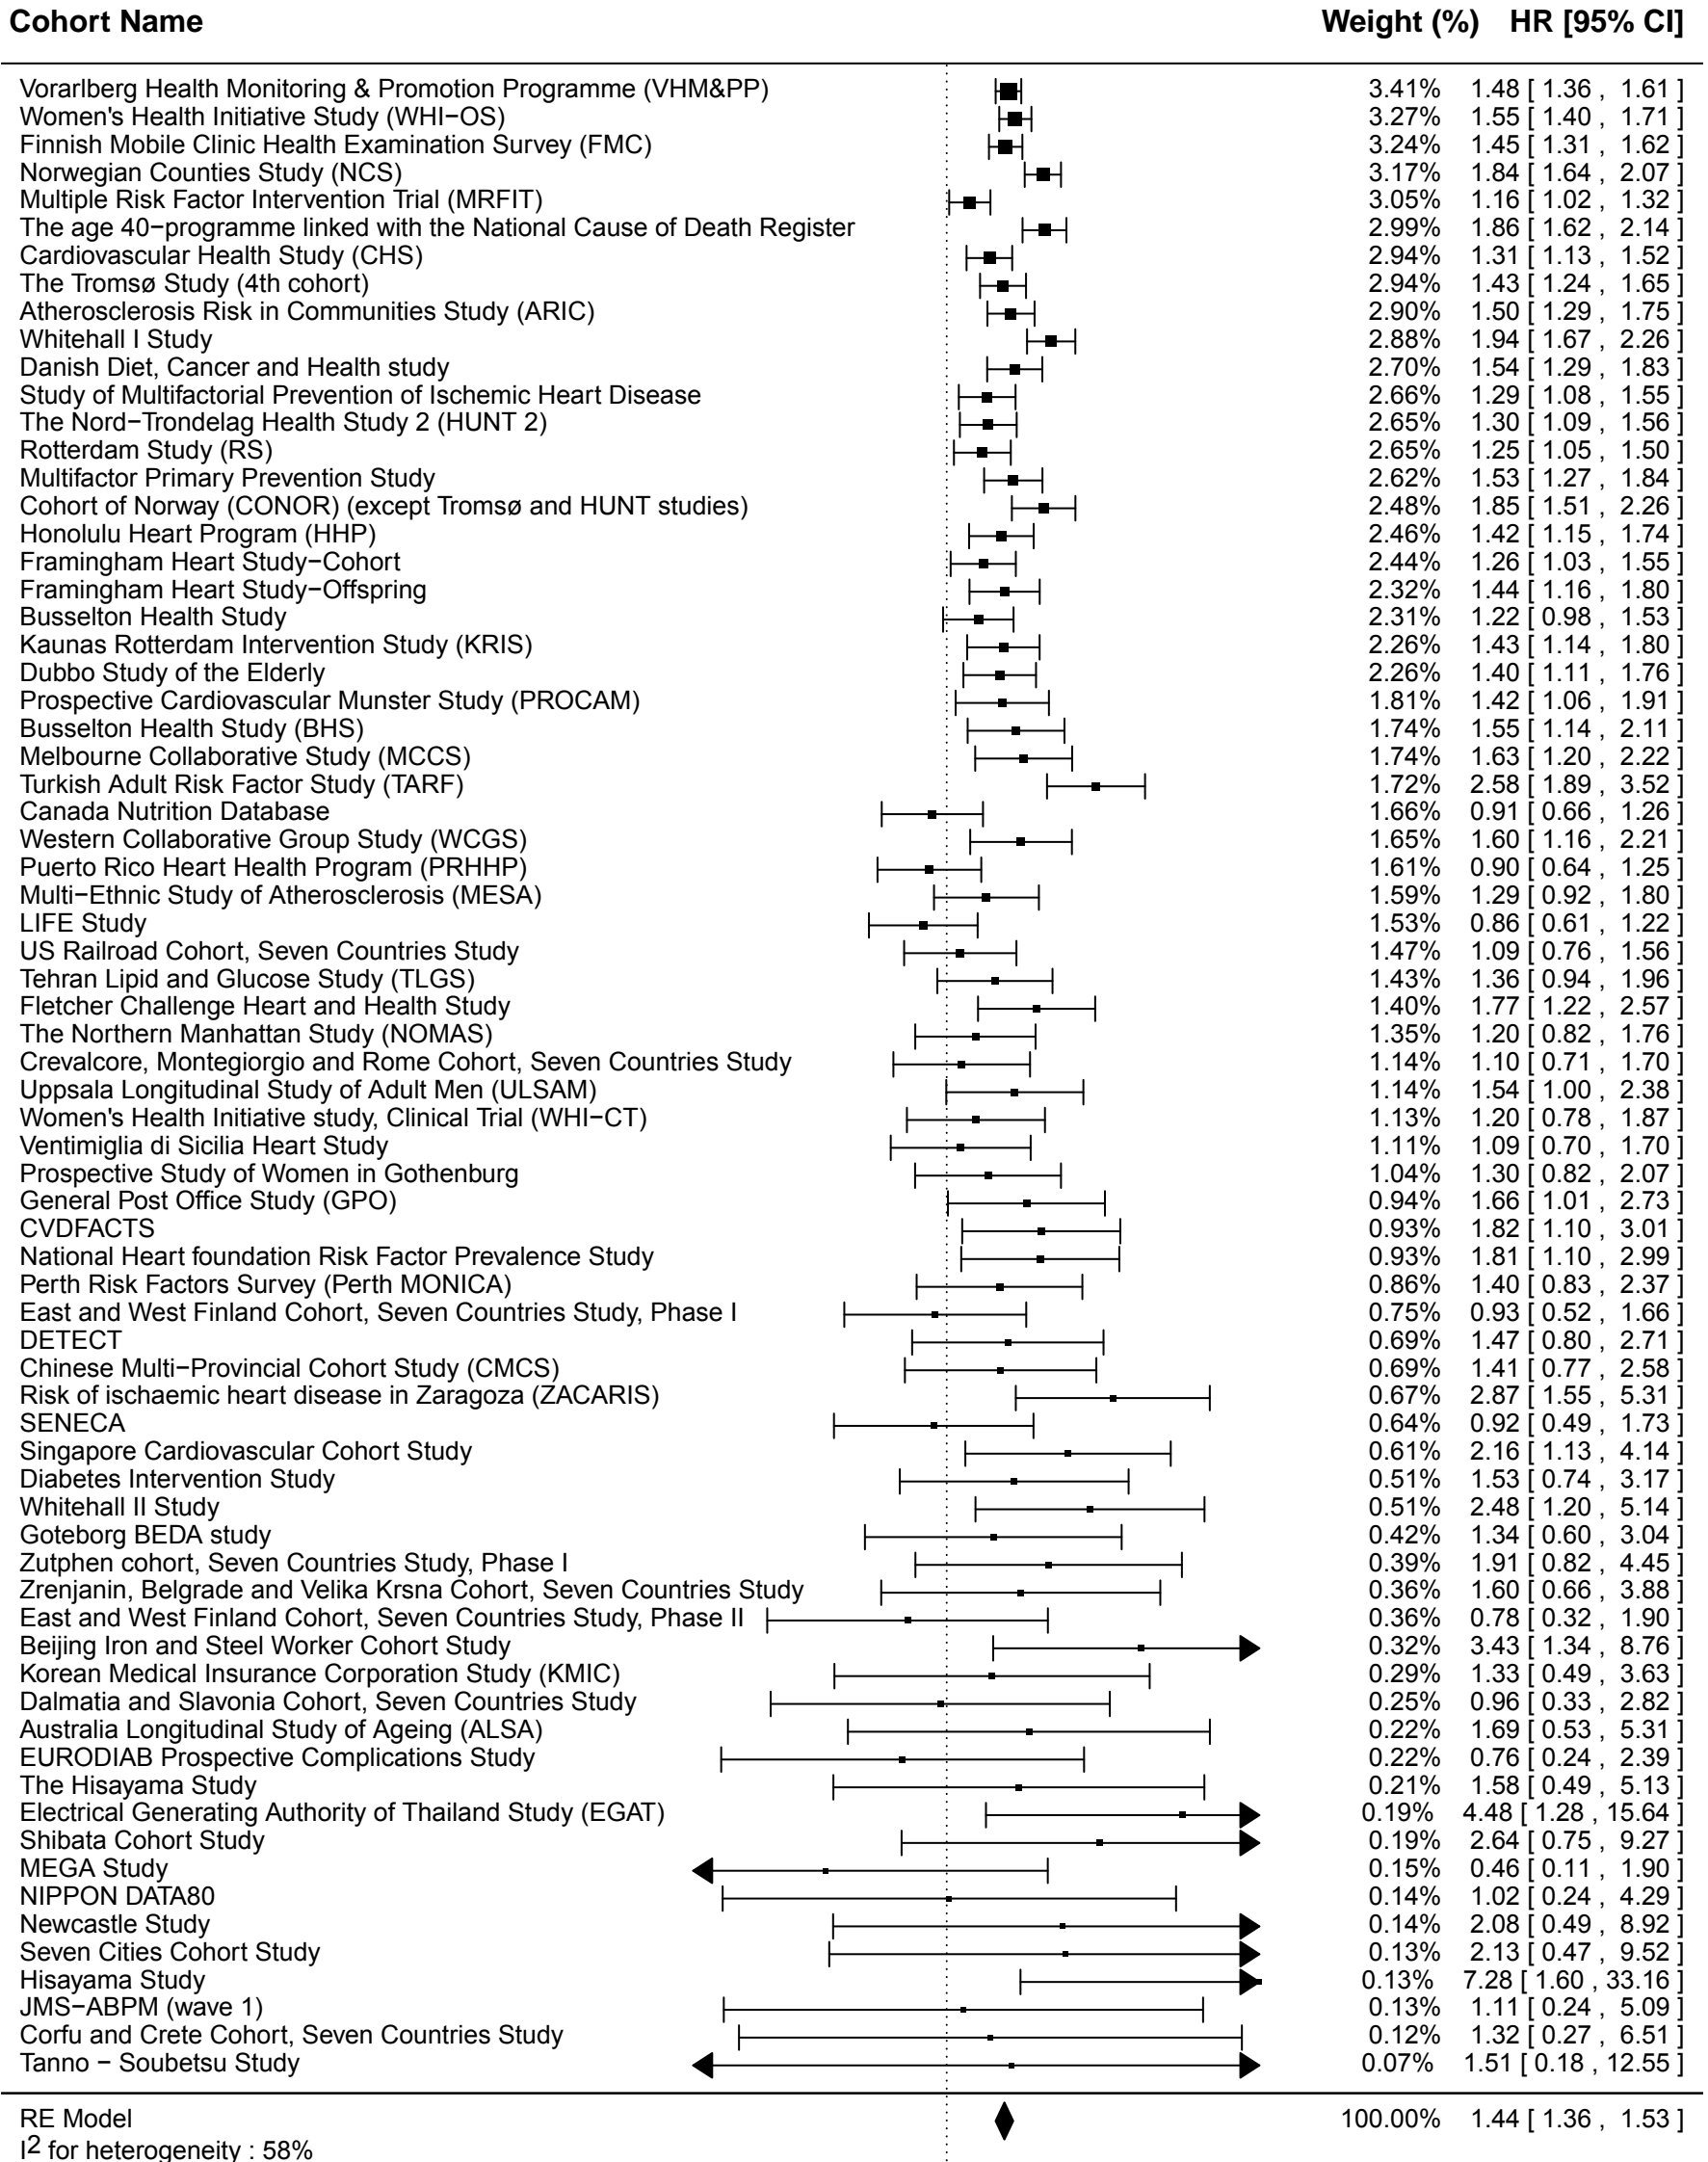

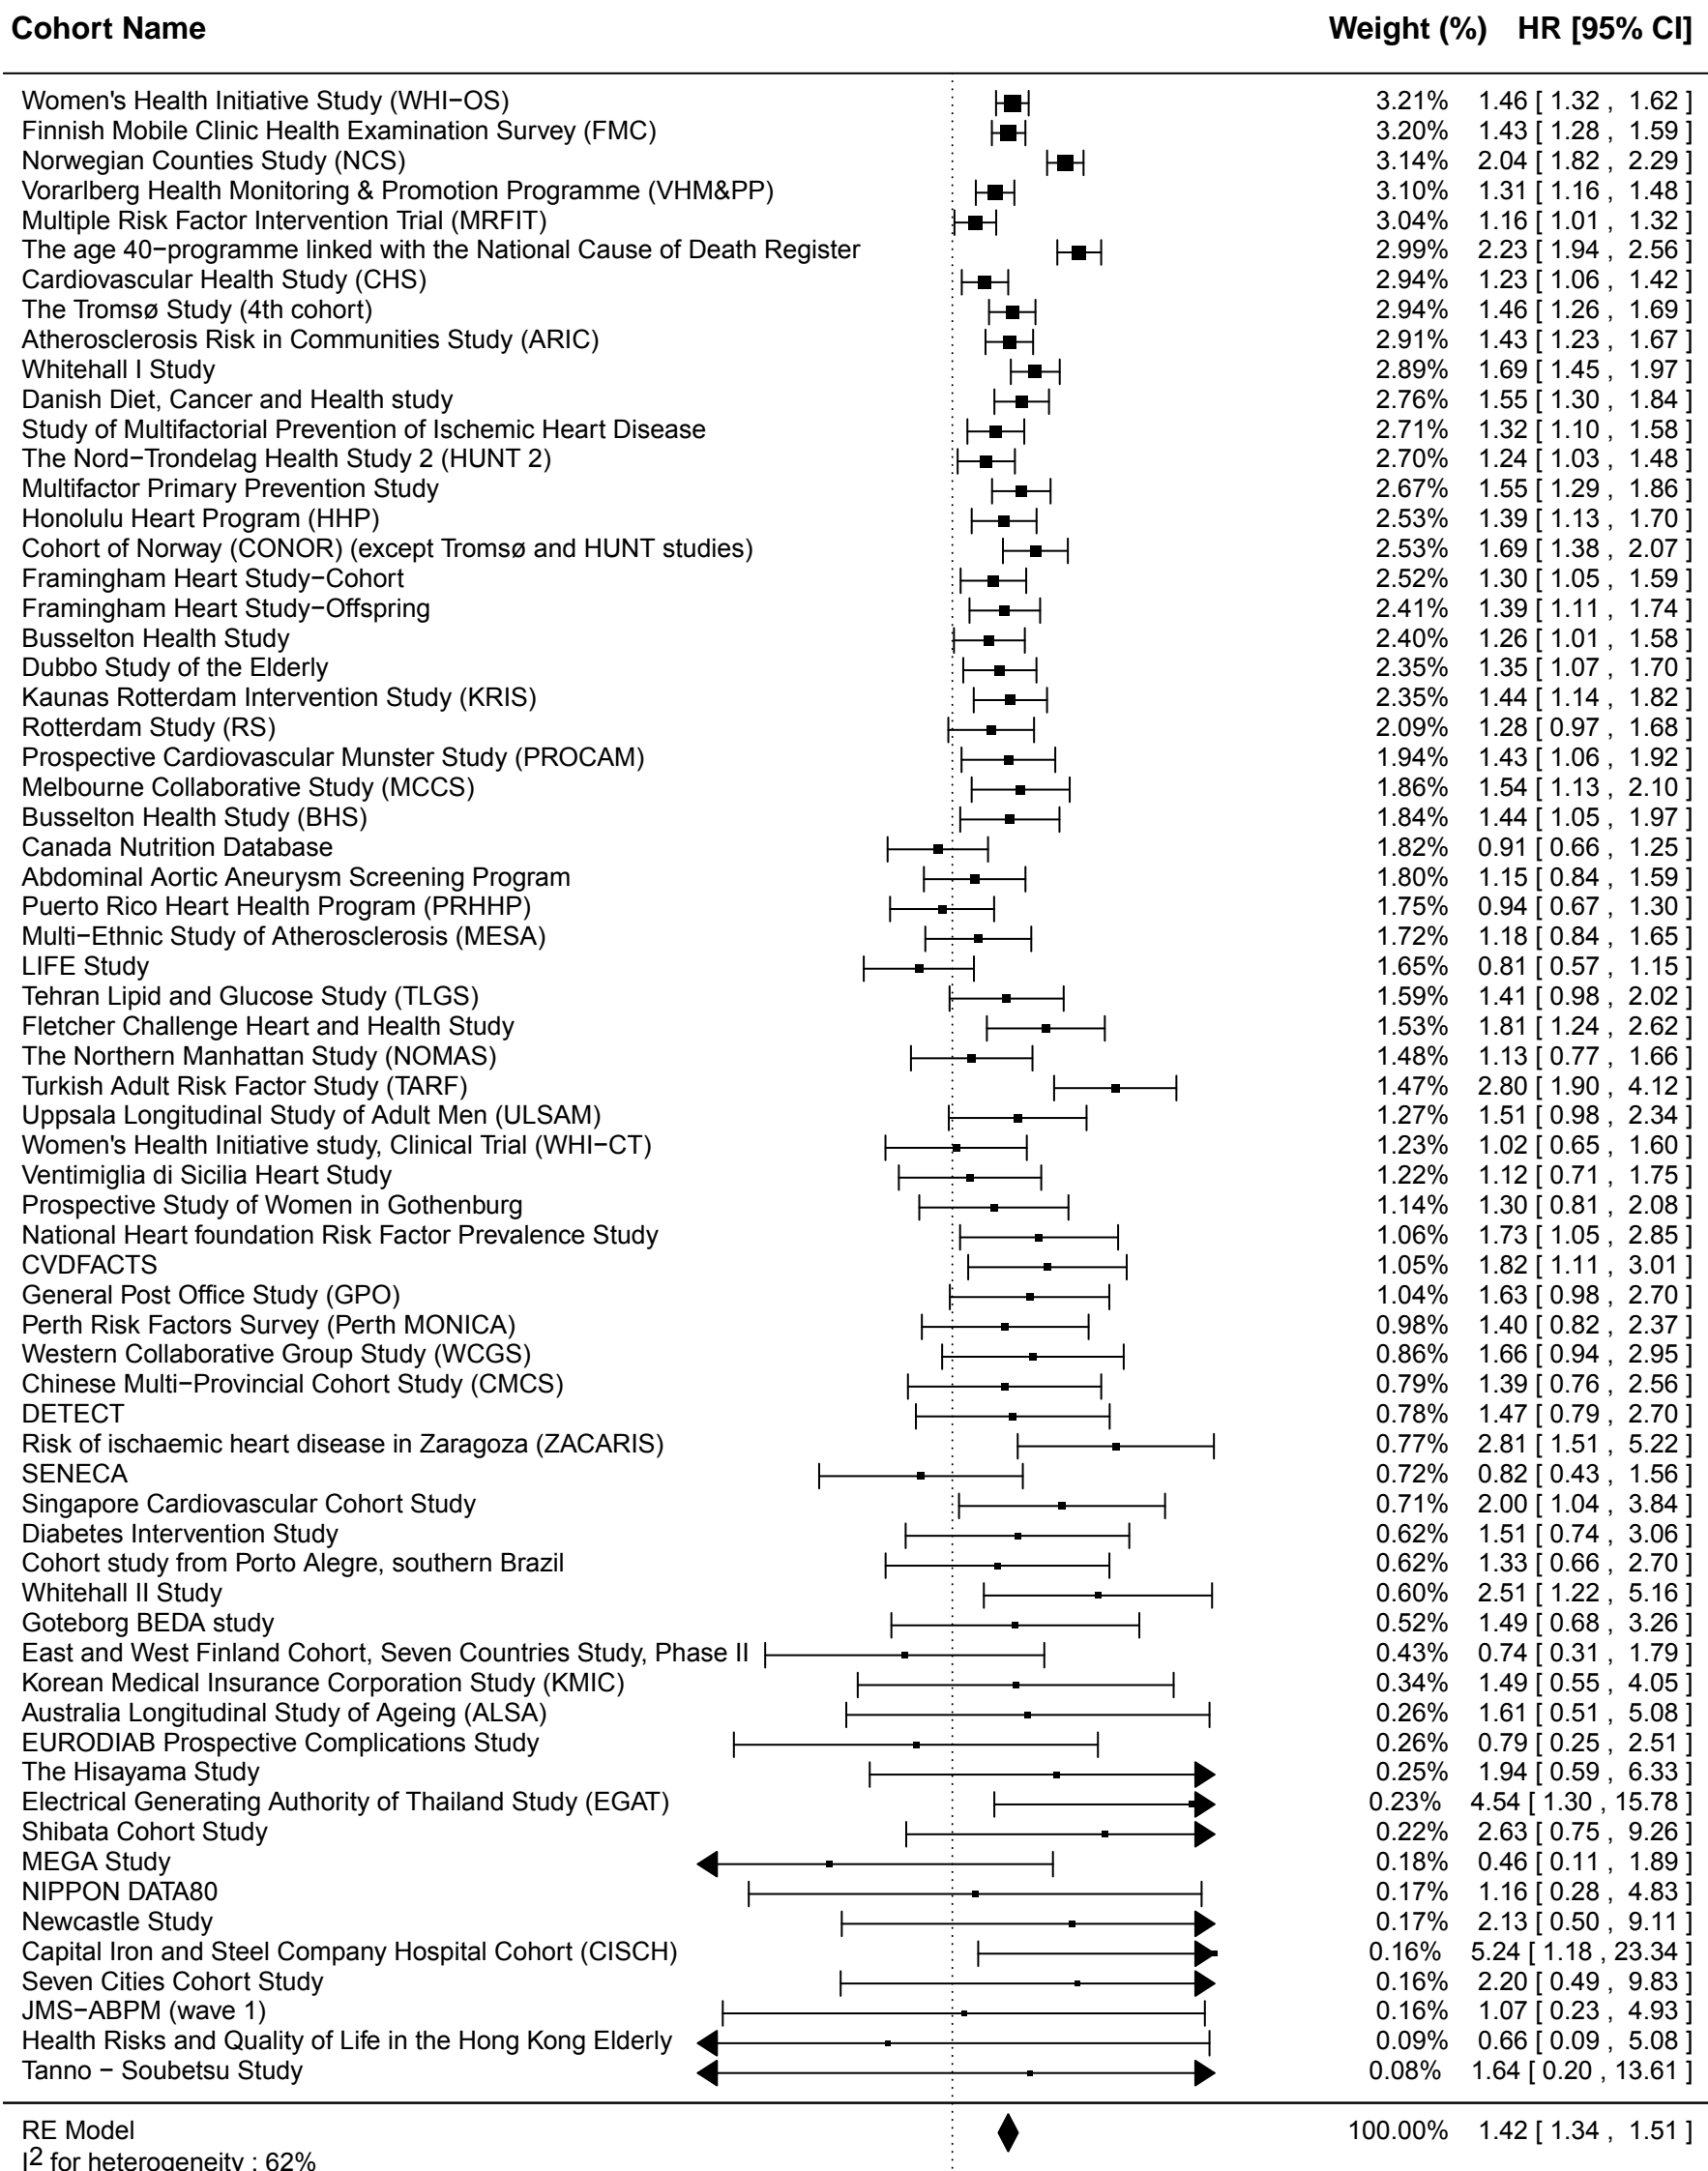

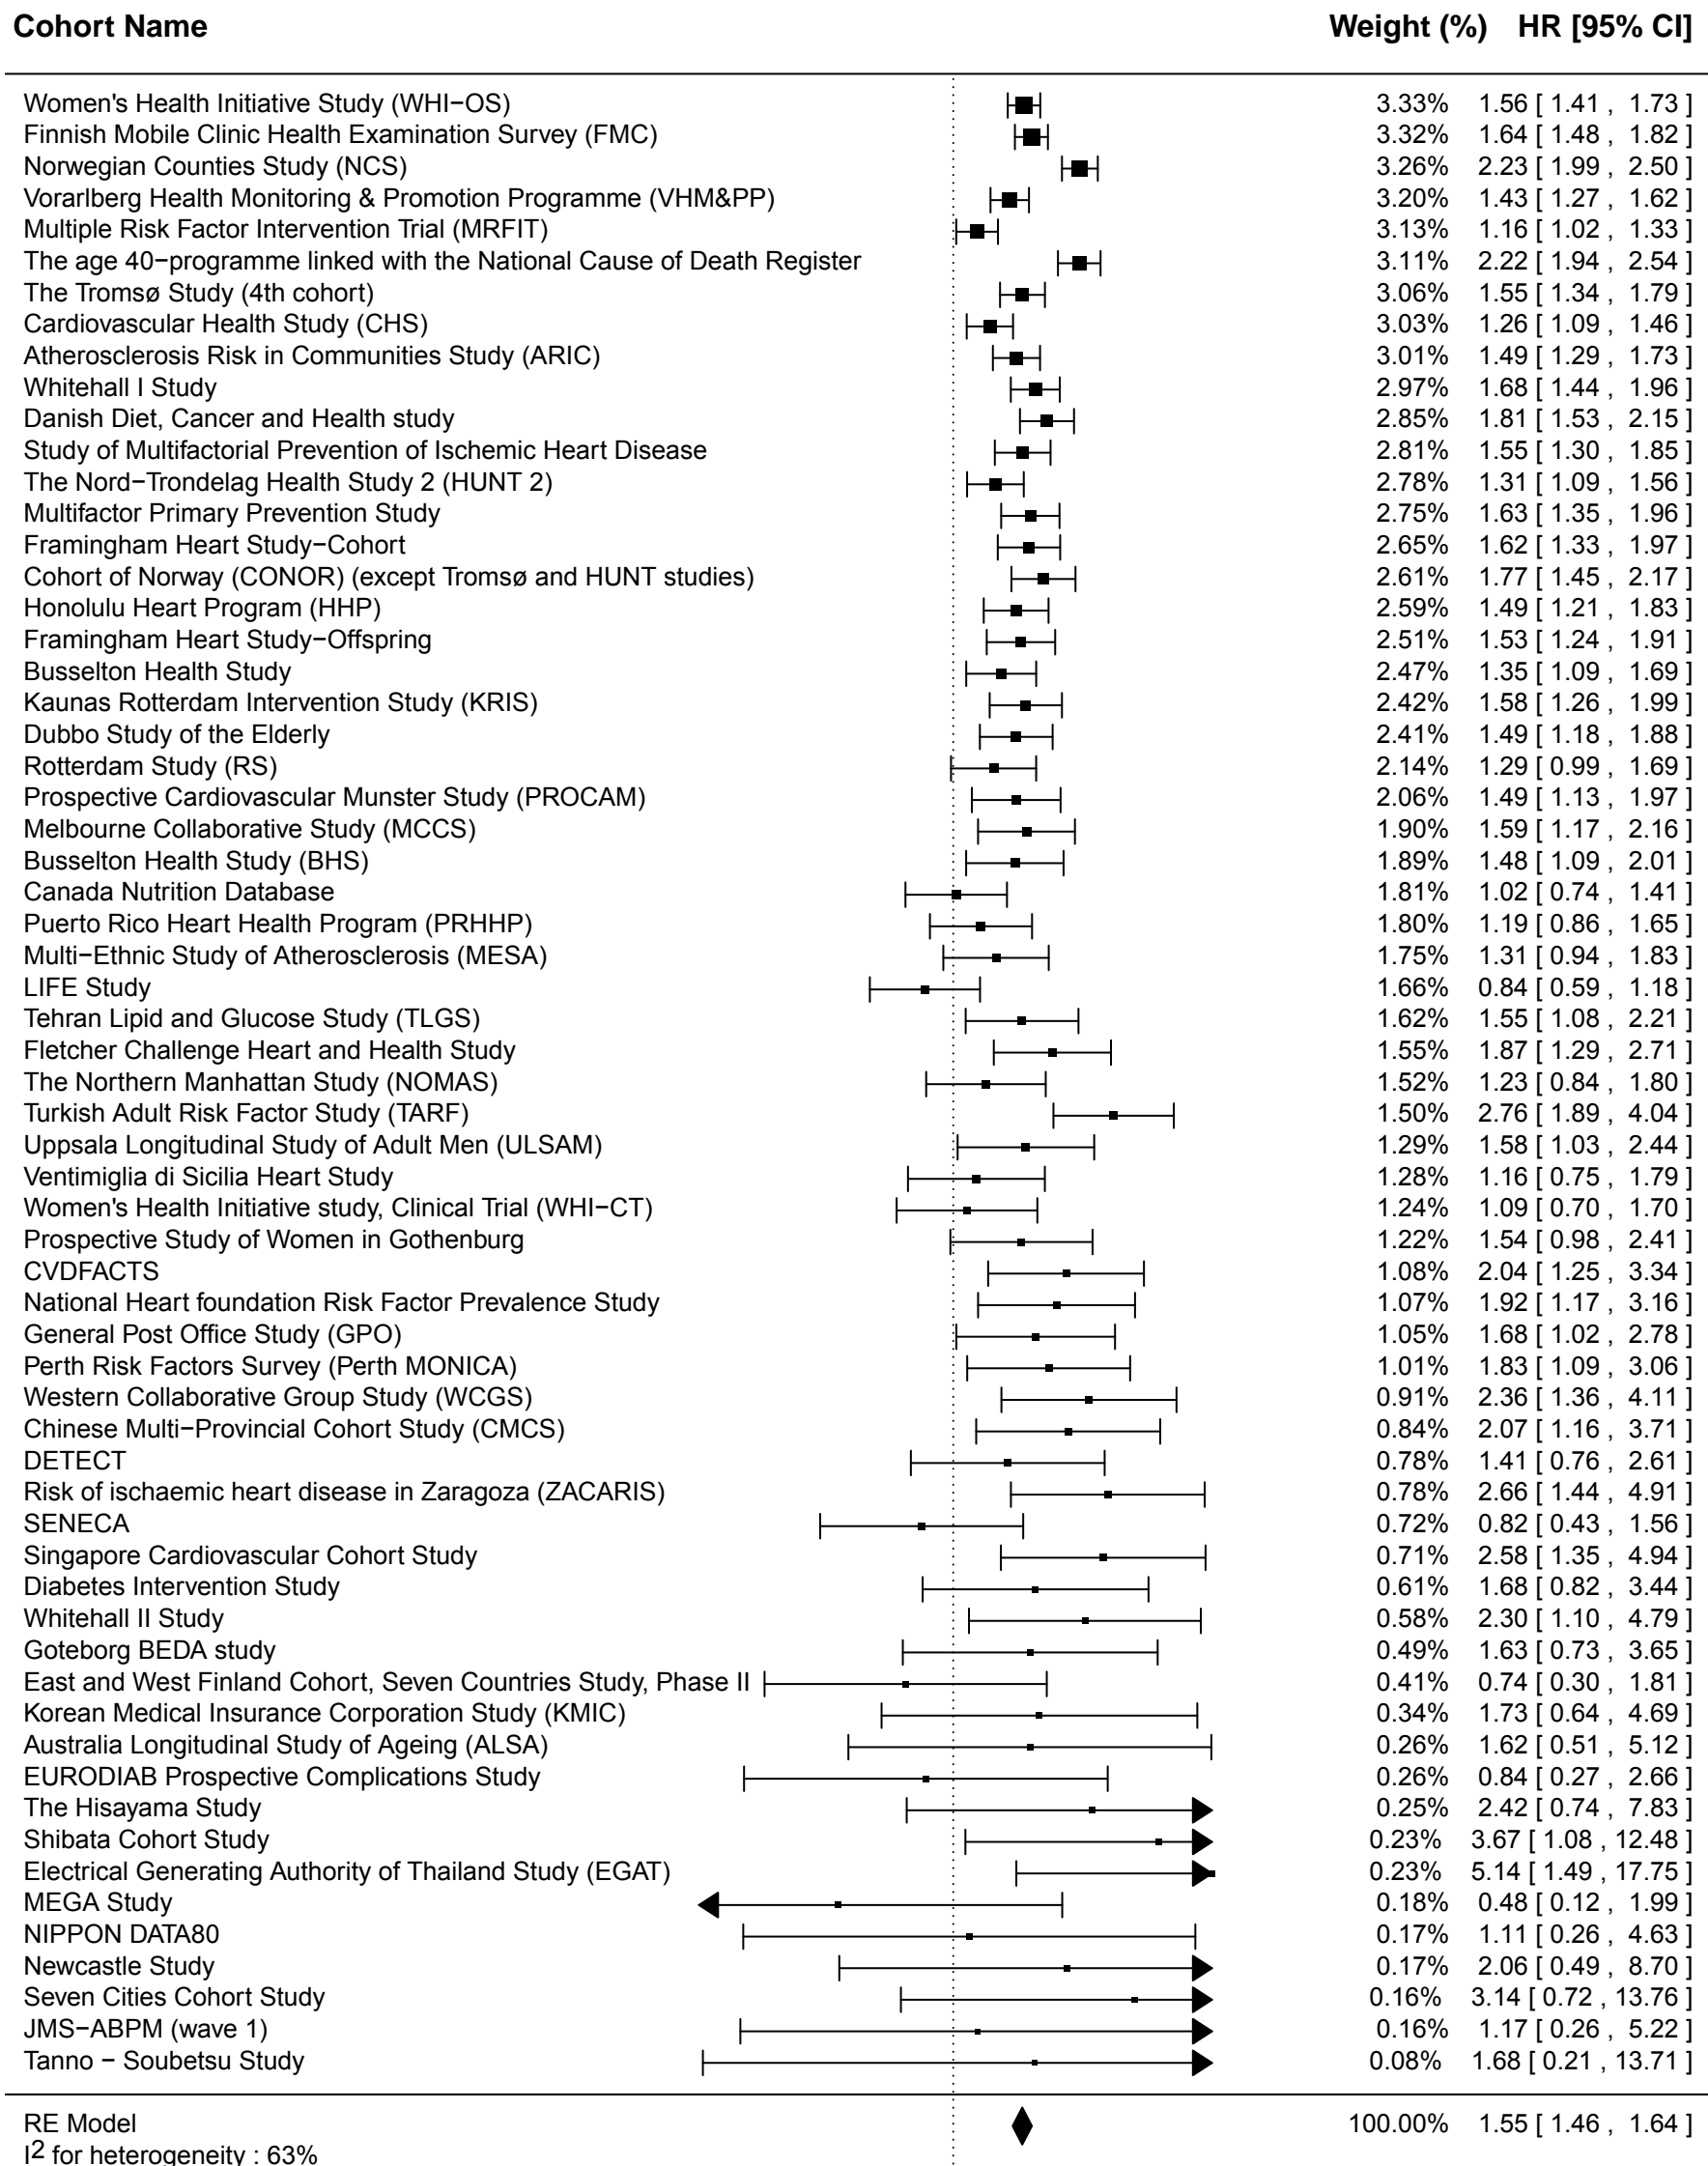

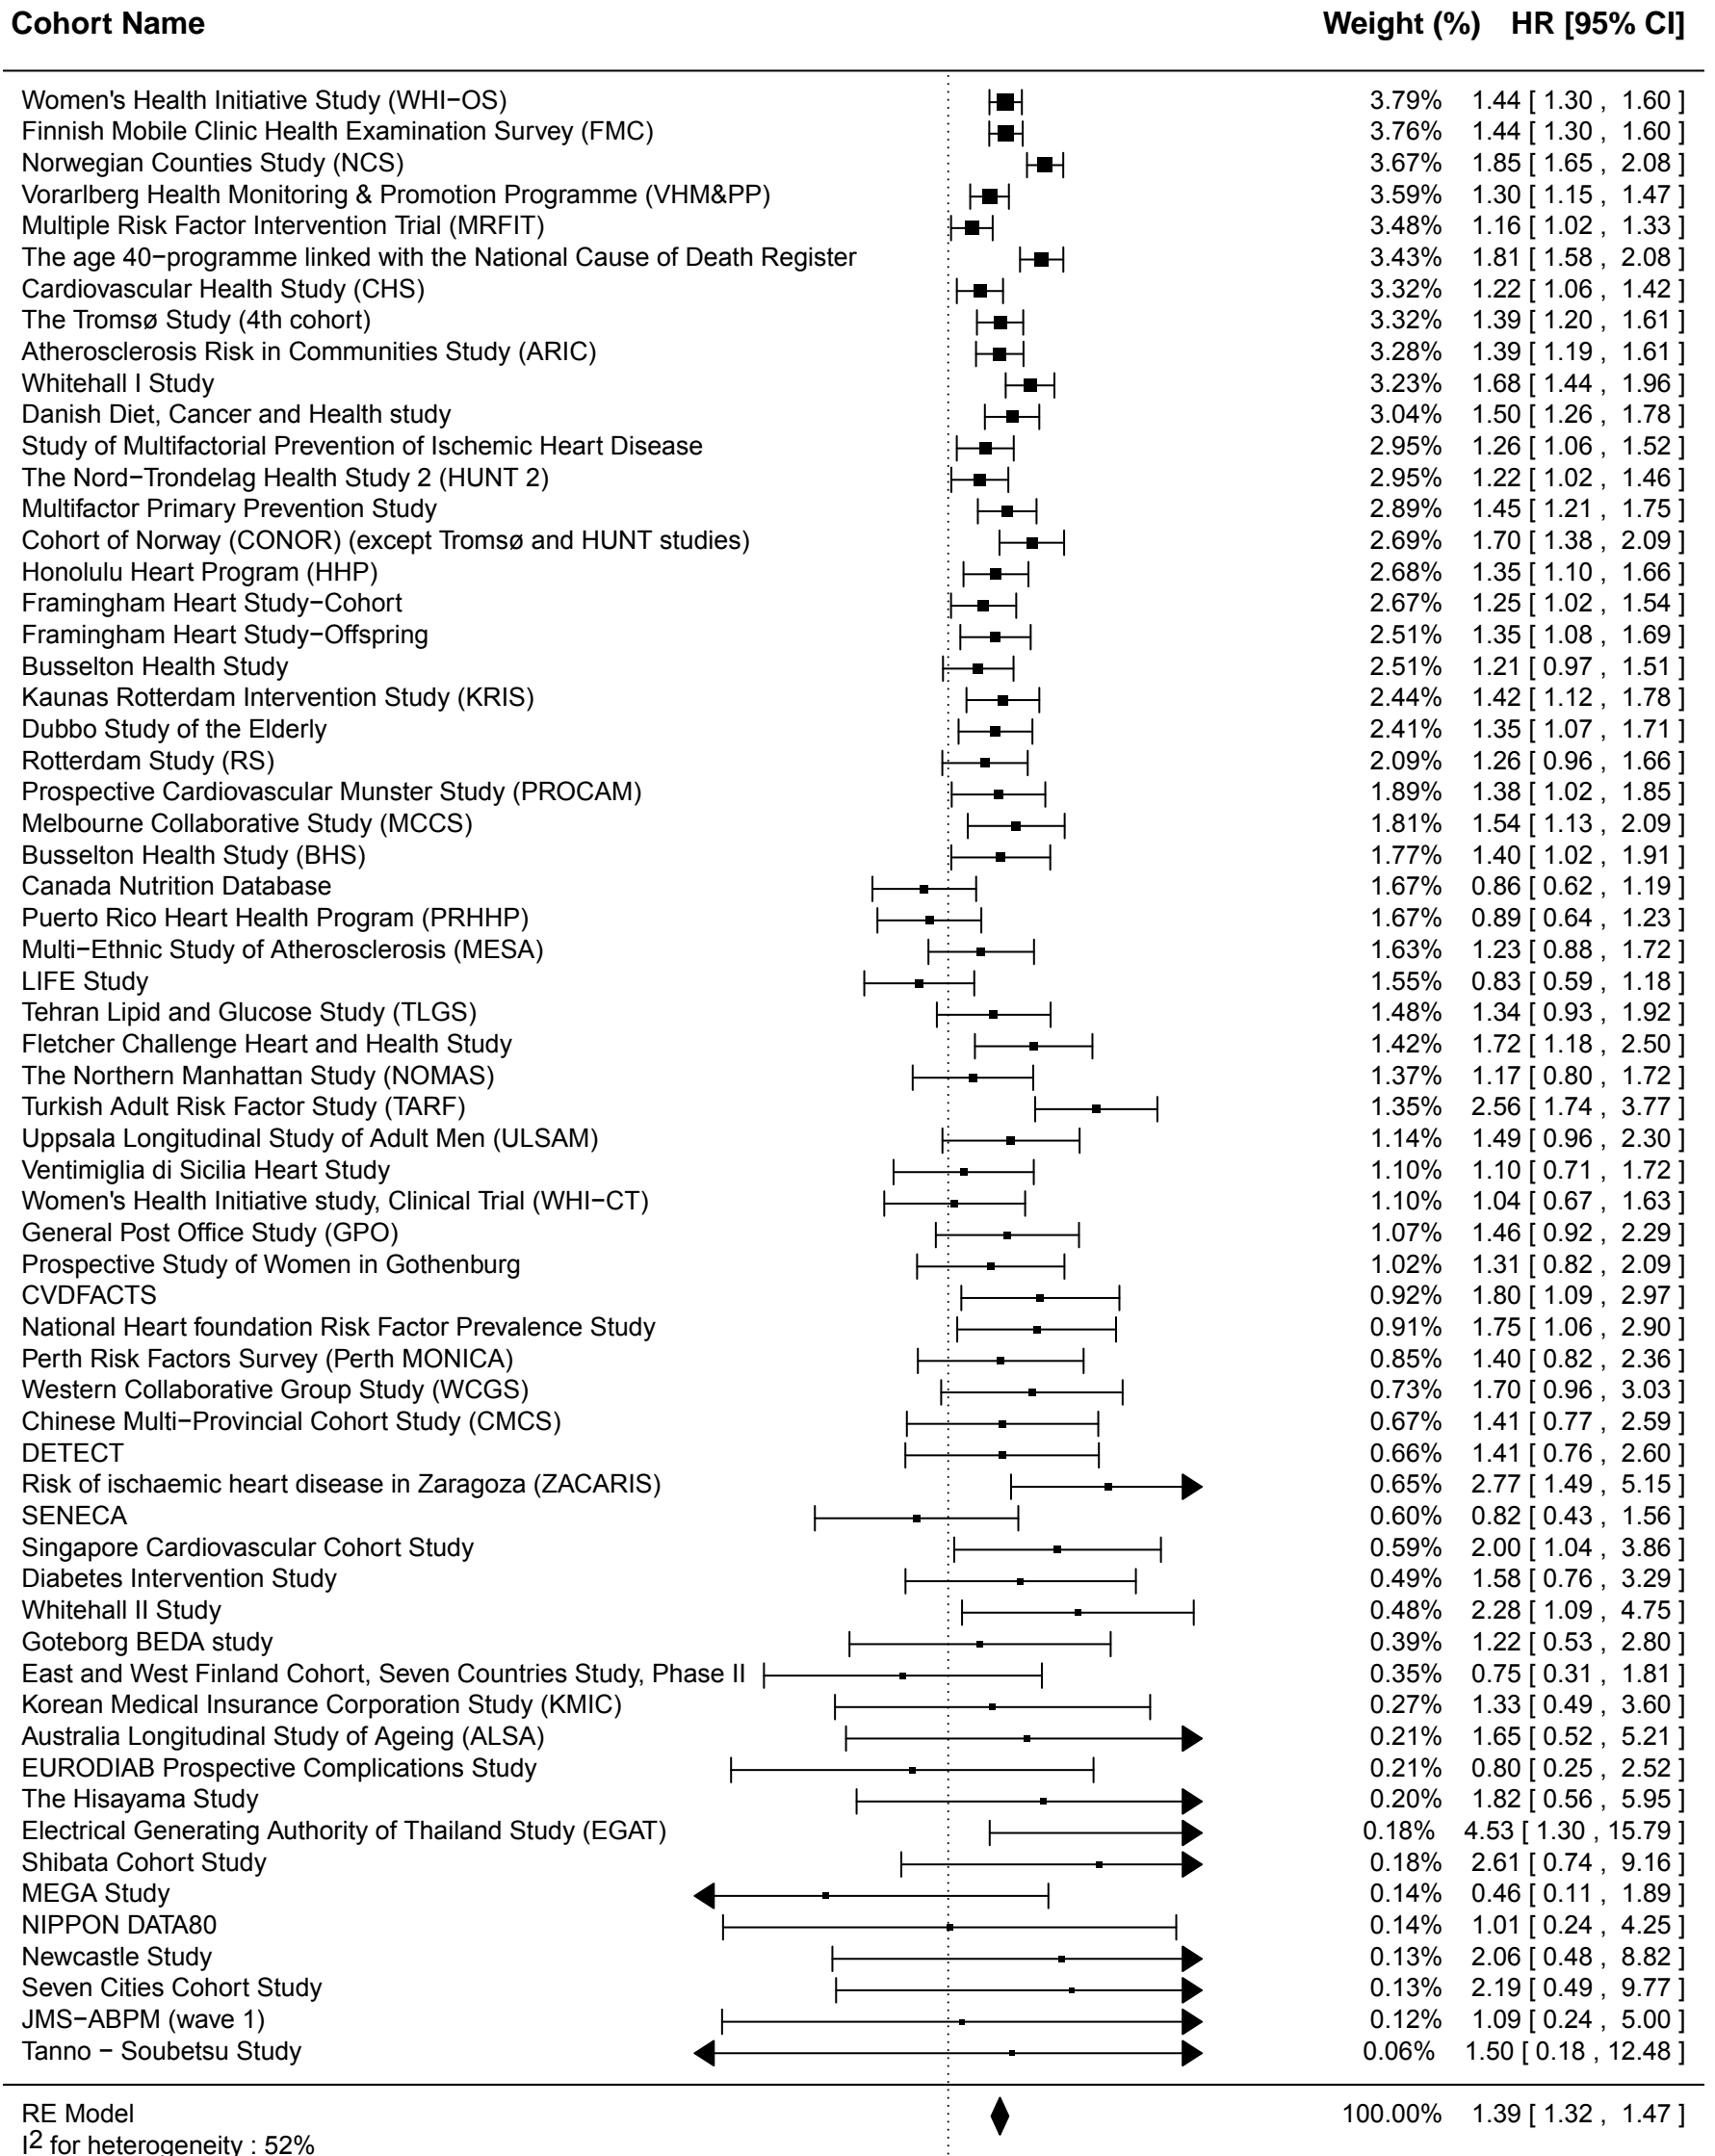



**Y gdlh wt g'7:** Cohort-specific hazard ratios (HRs) of stroke for obesity vs. normal weight.

(Some cohorts that had BMI continuously did not have sufficient events in this BMI range for categorical analysis.)

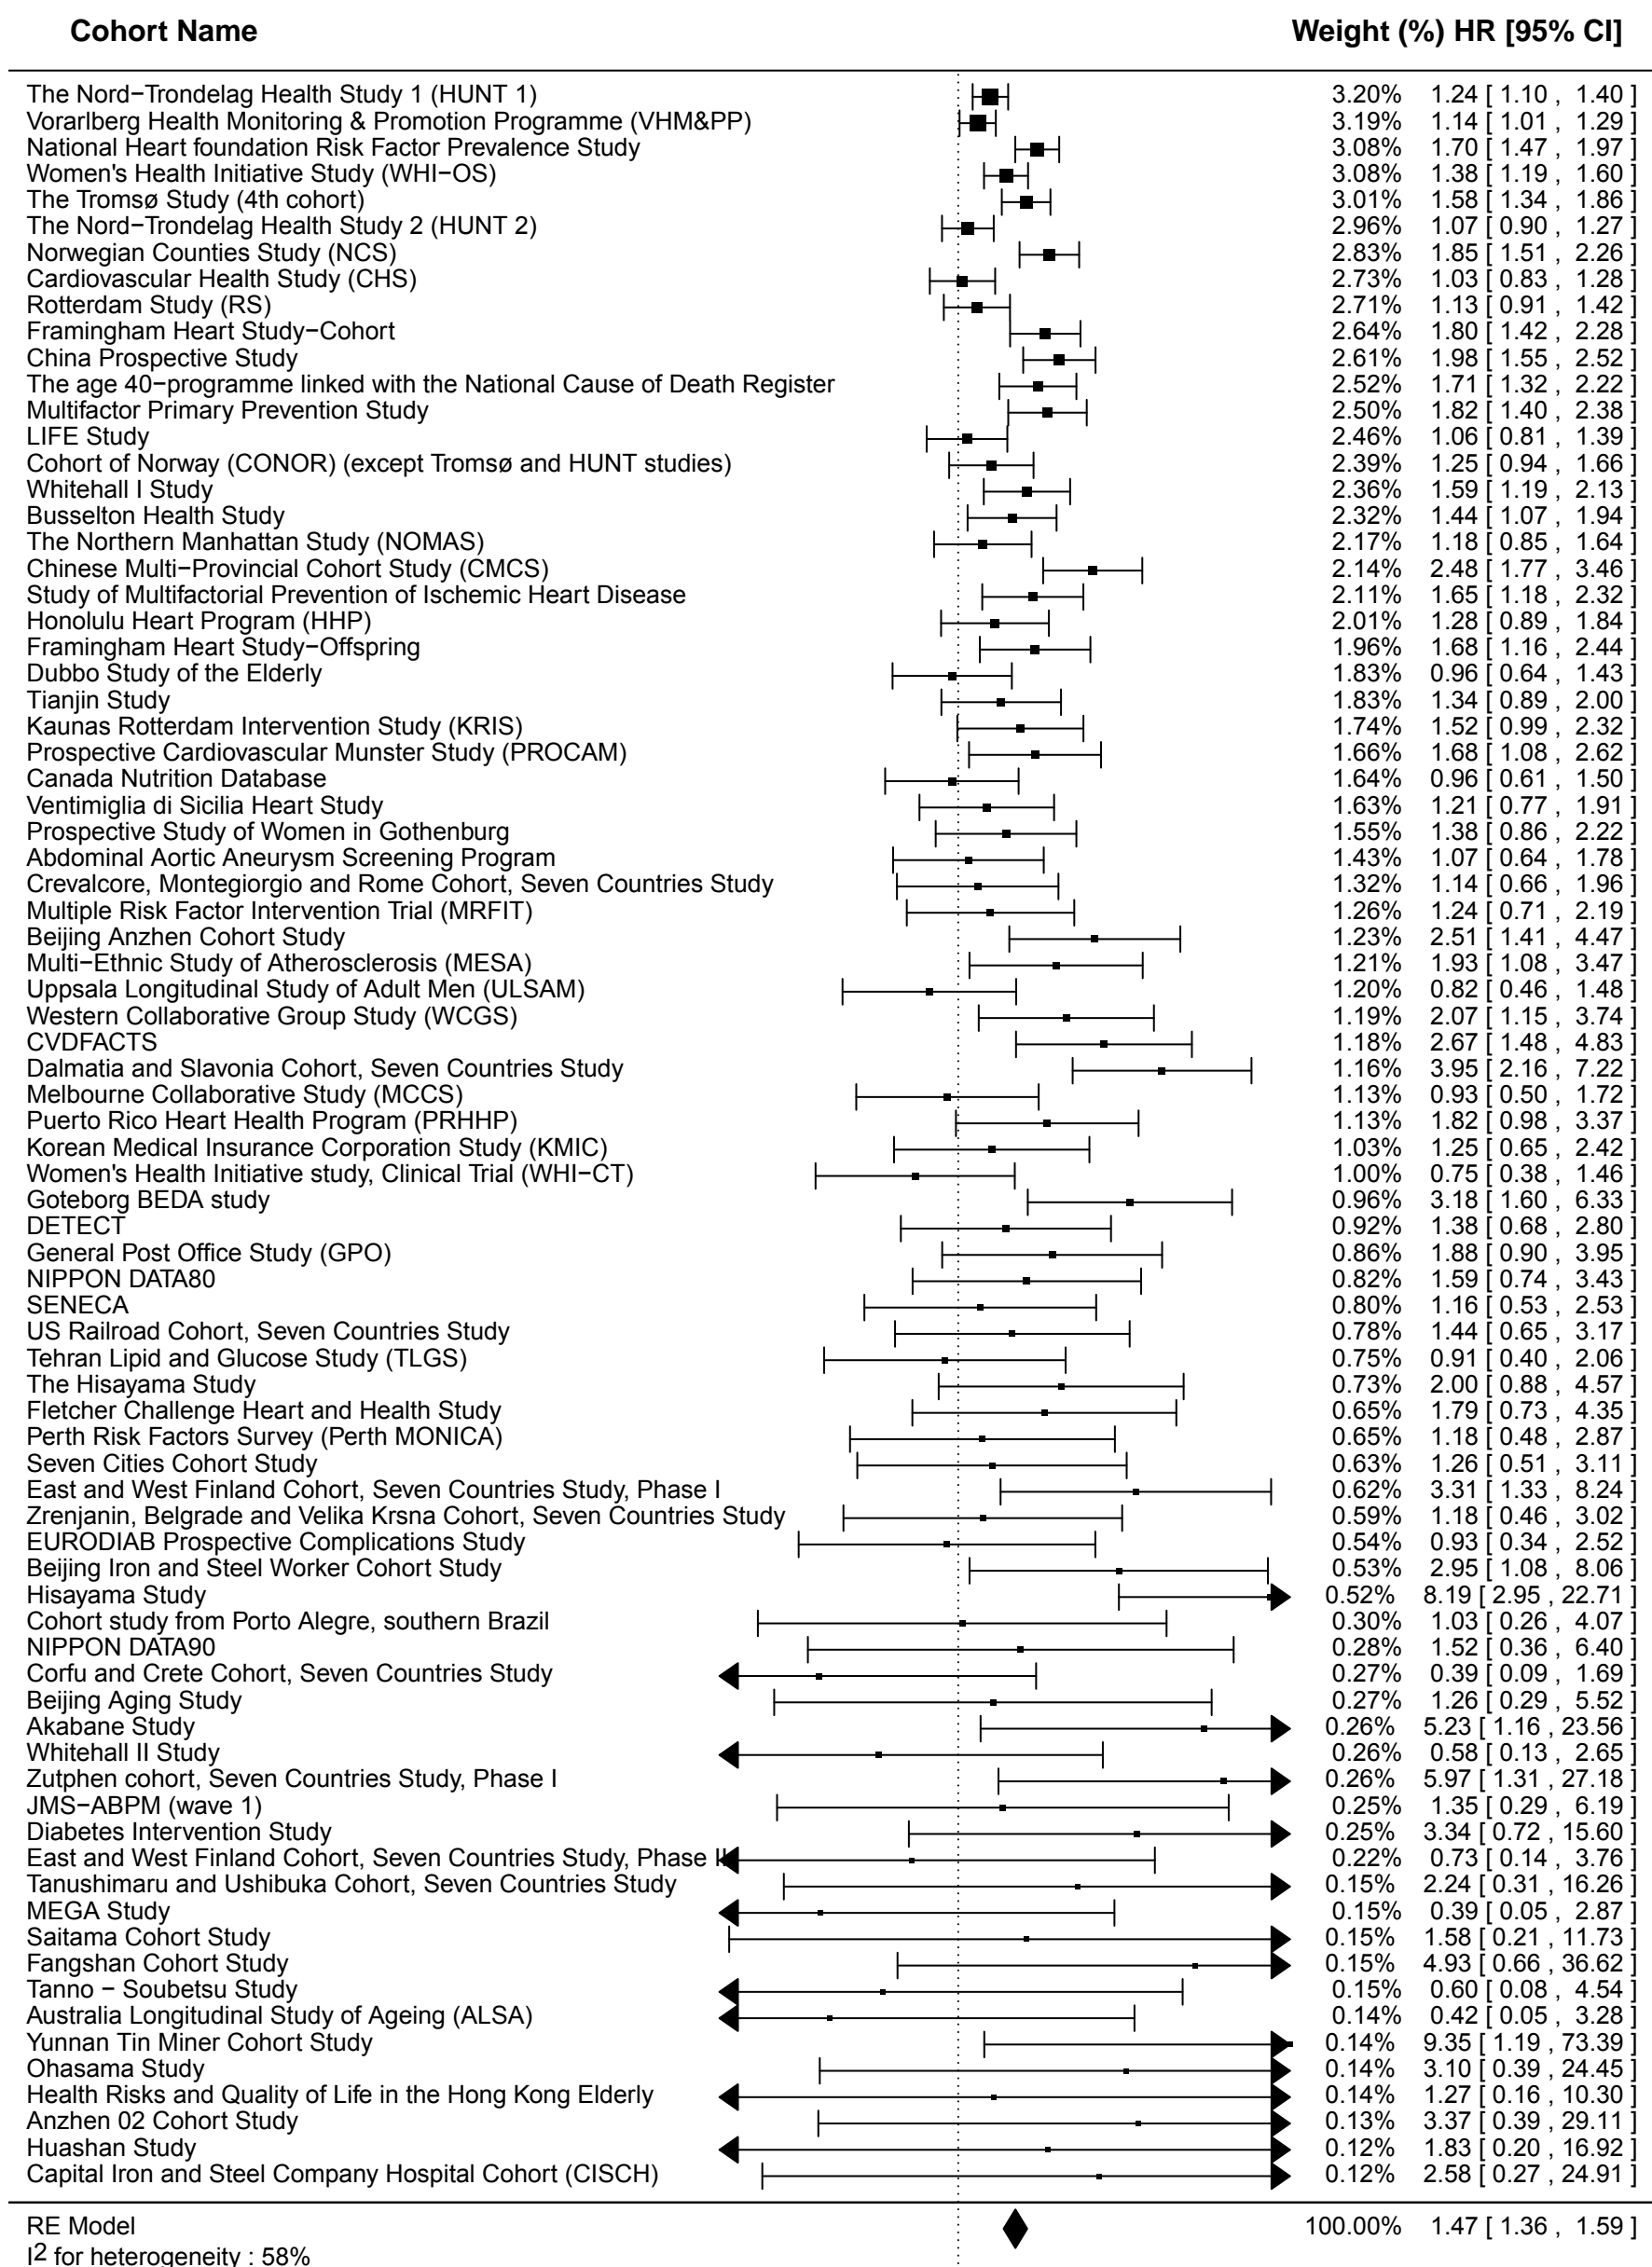

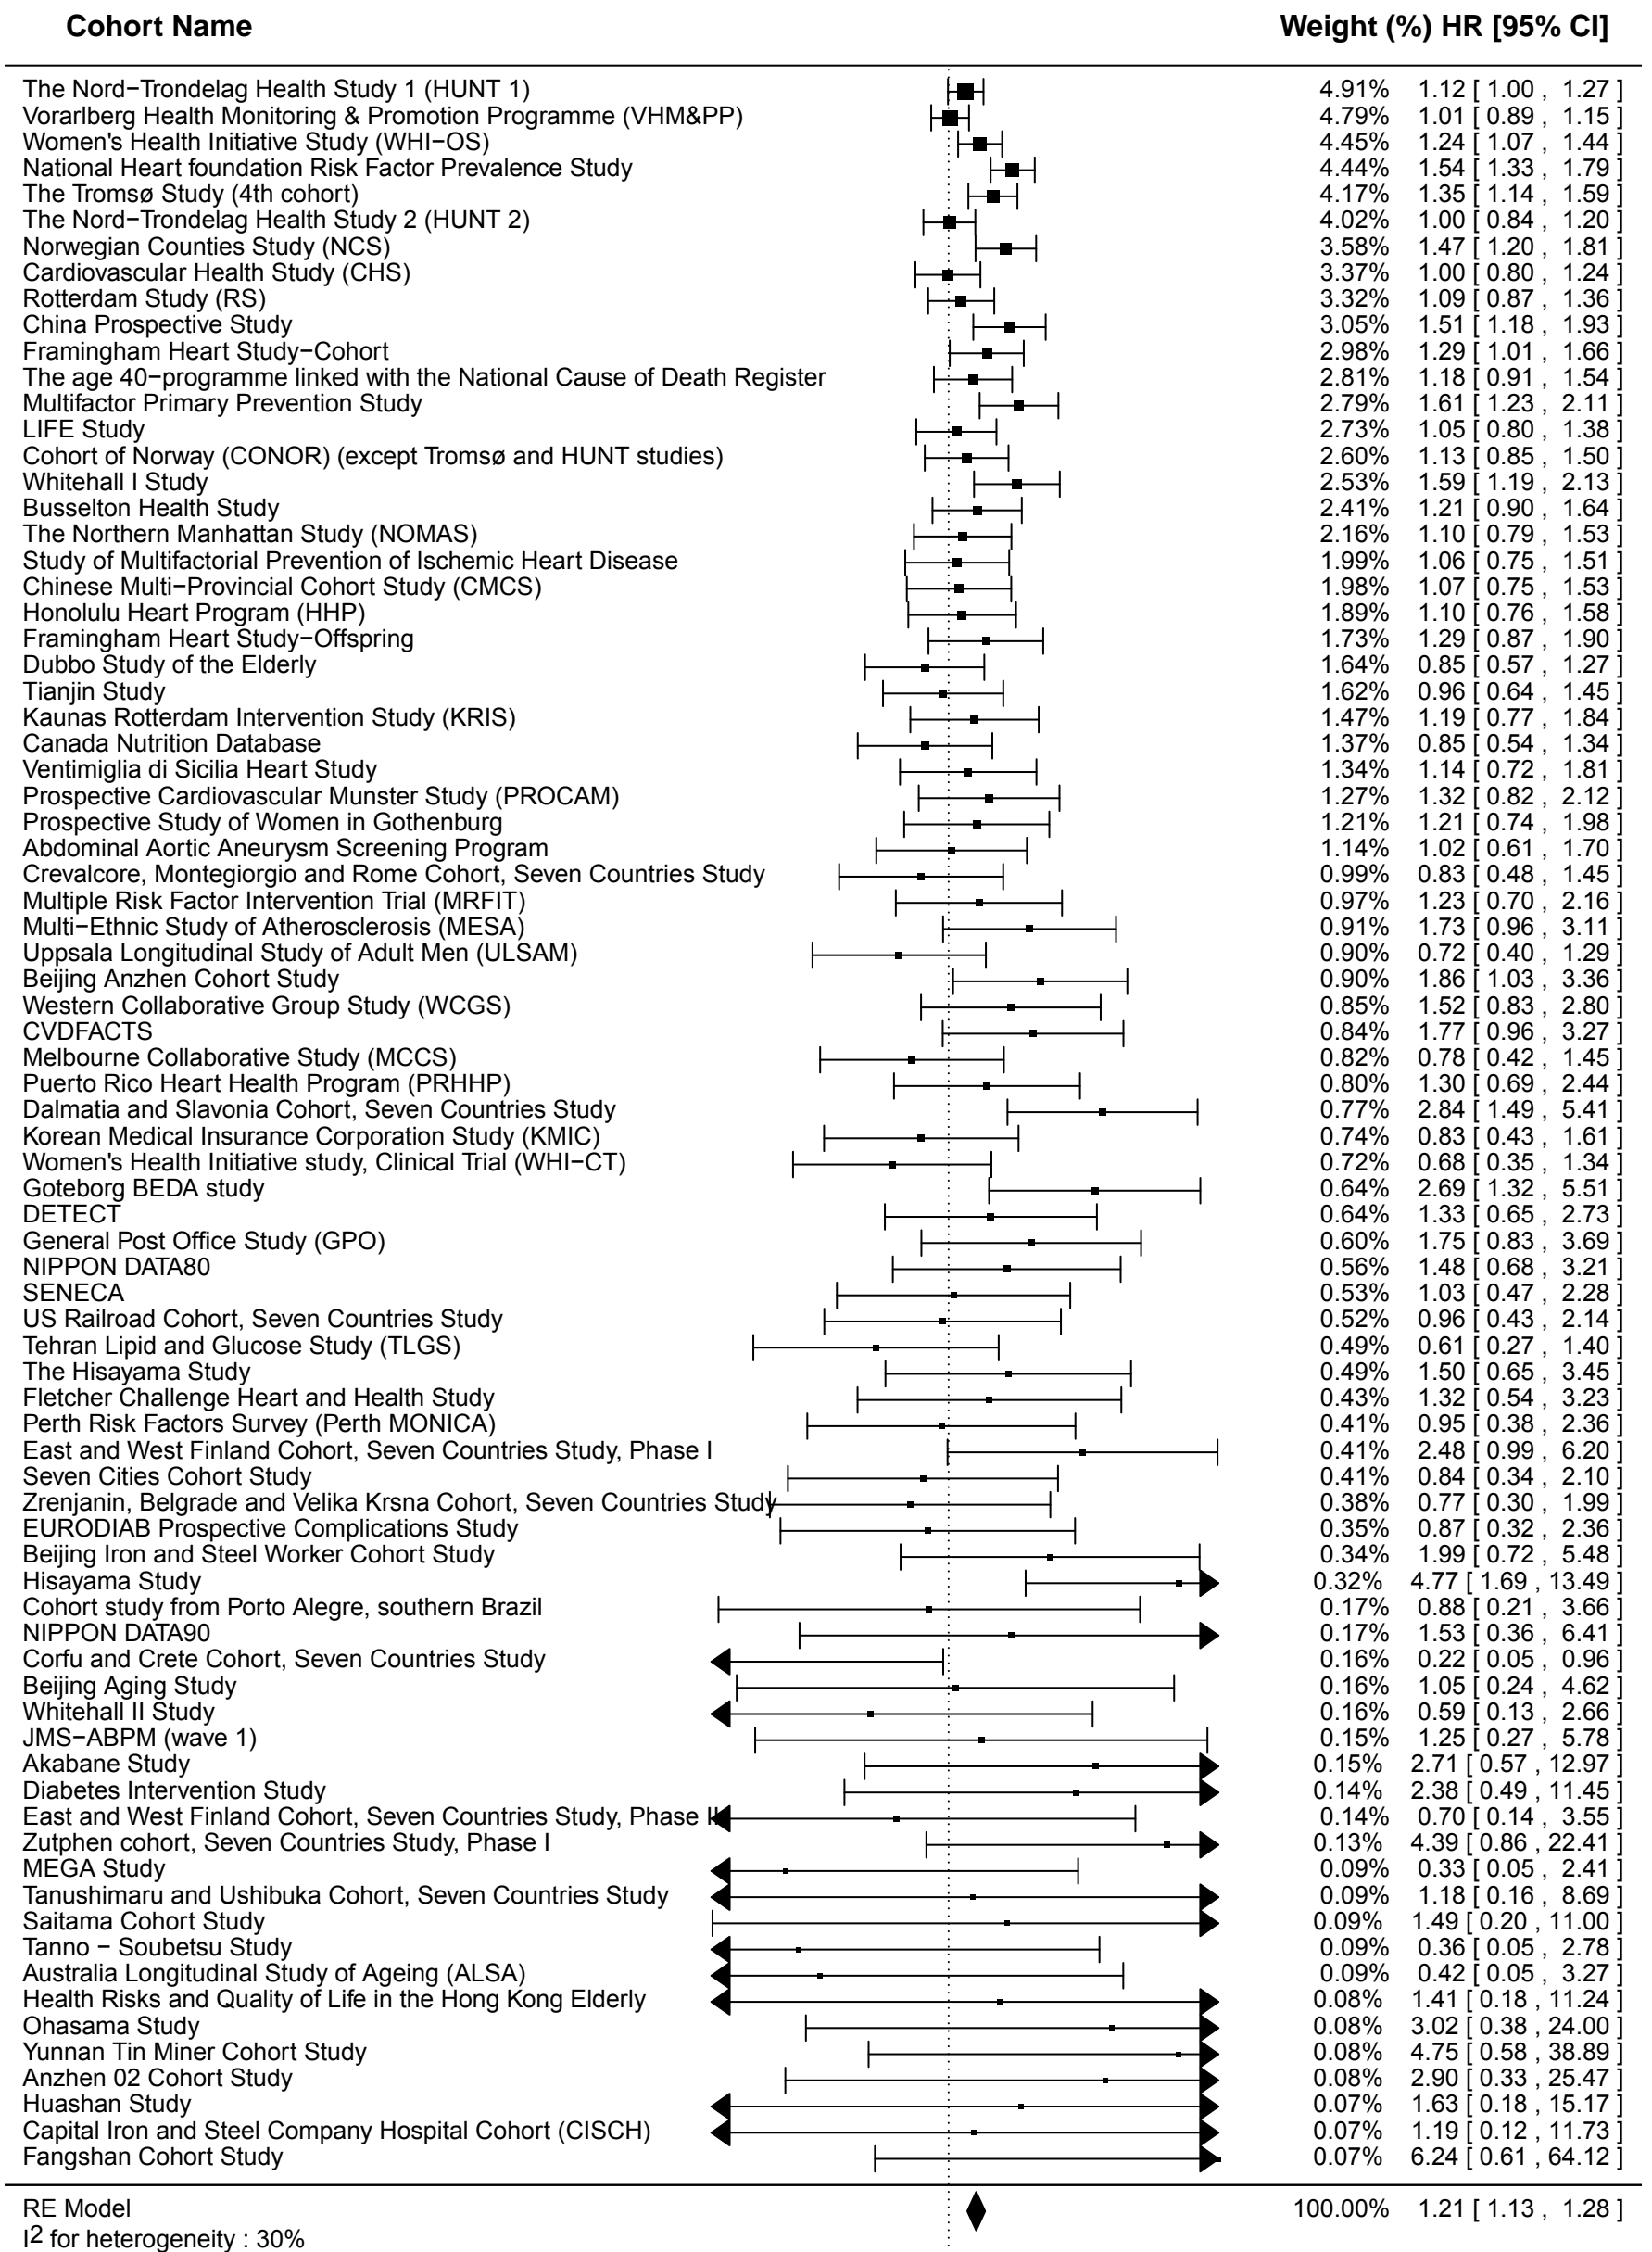

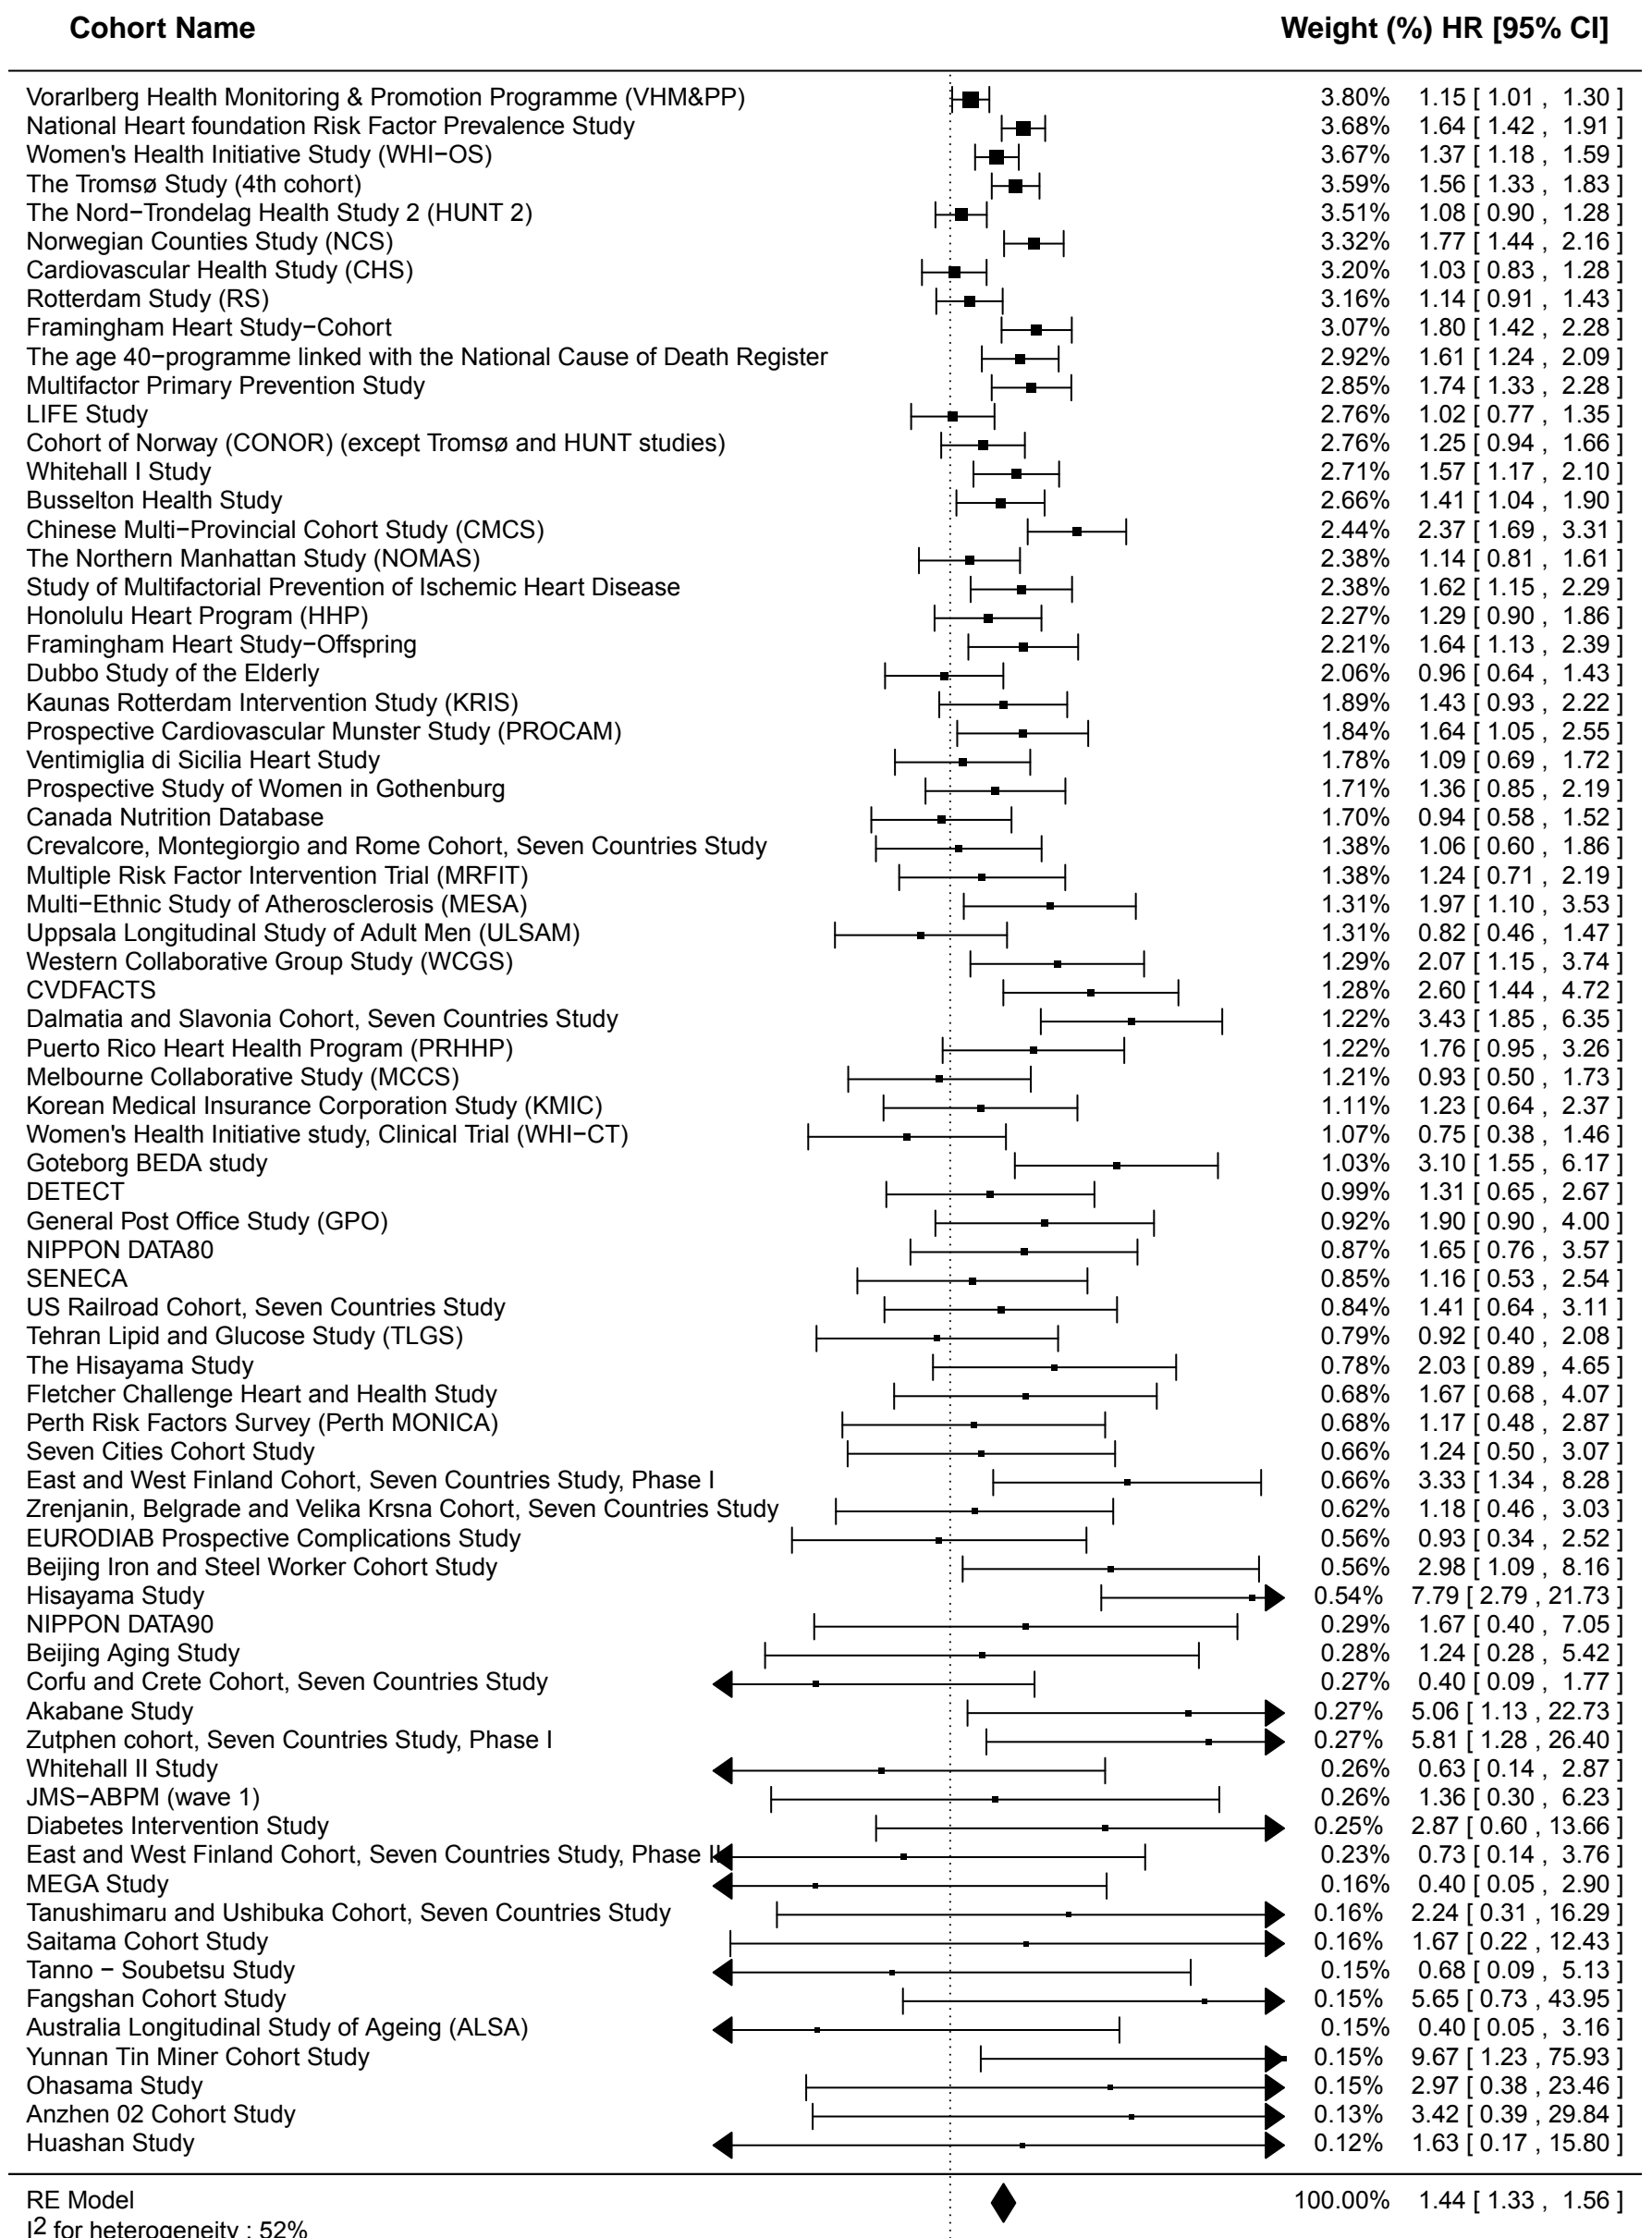

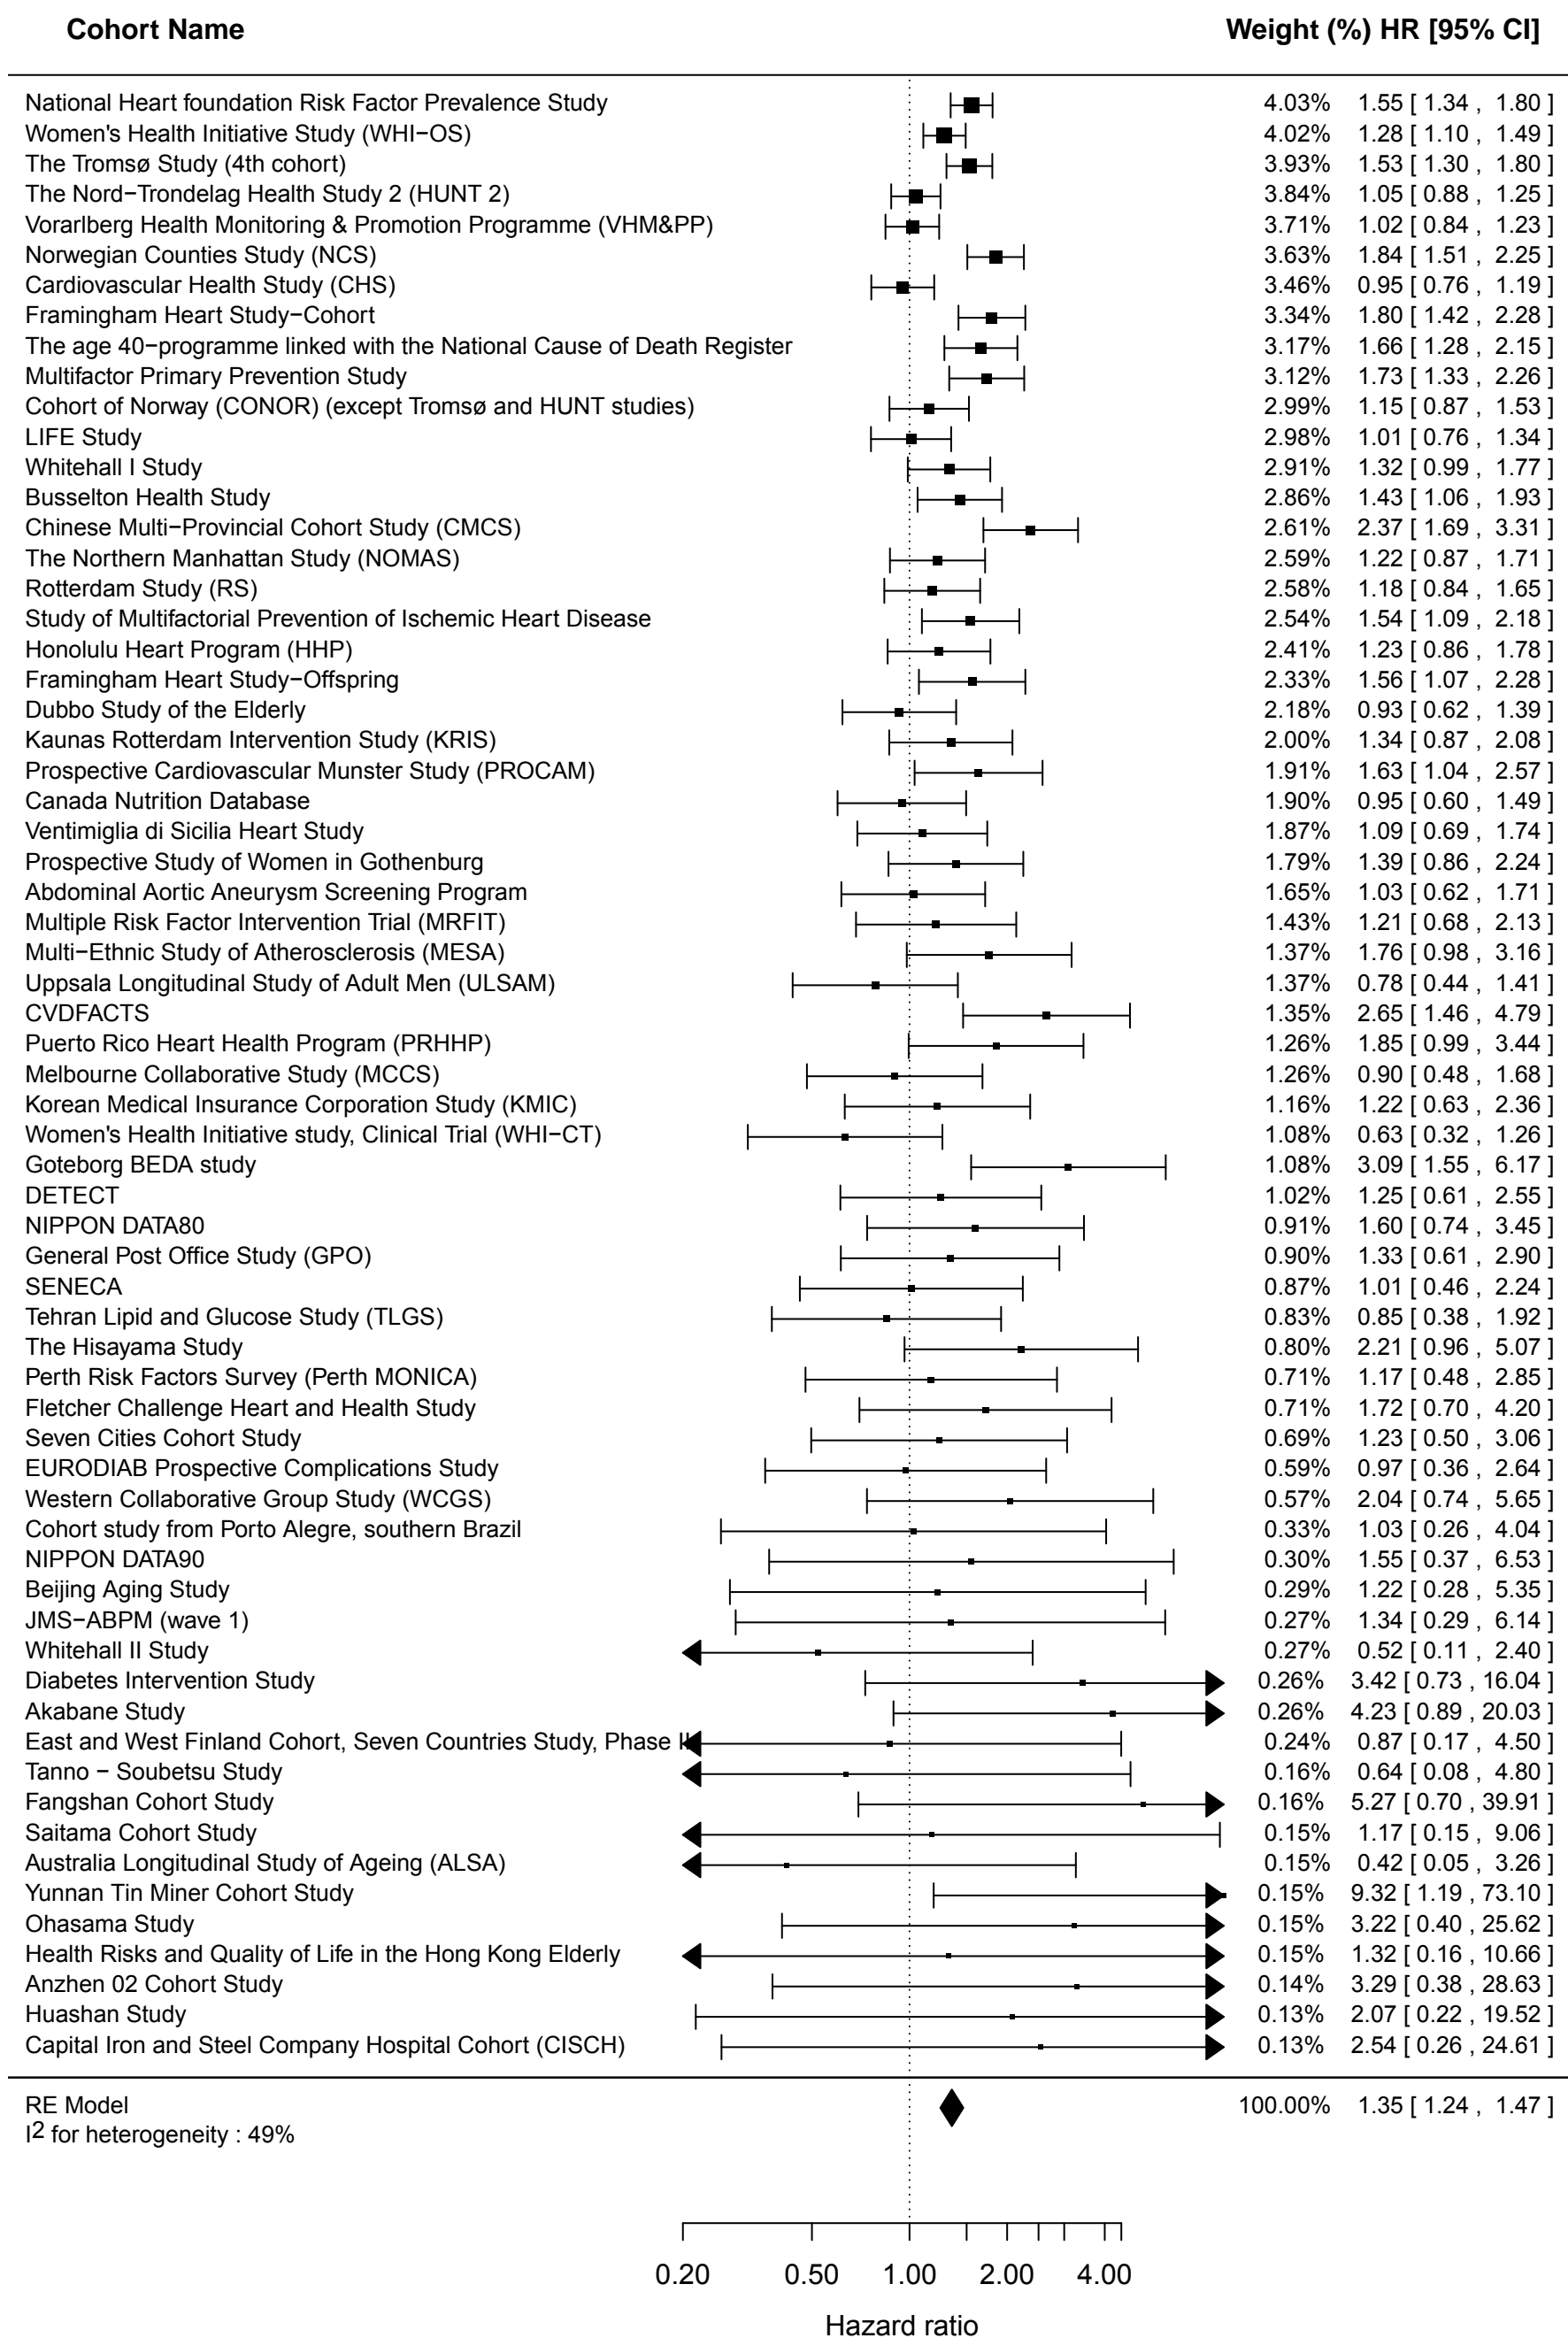

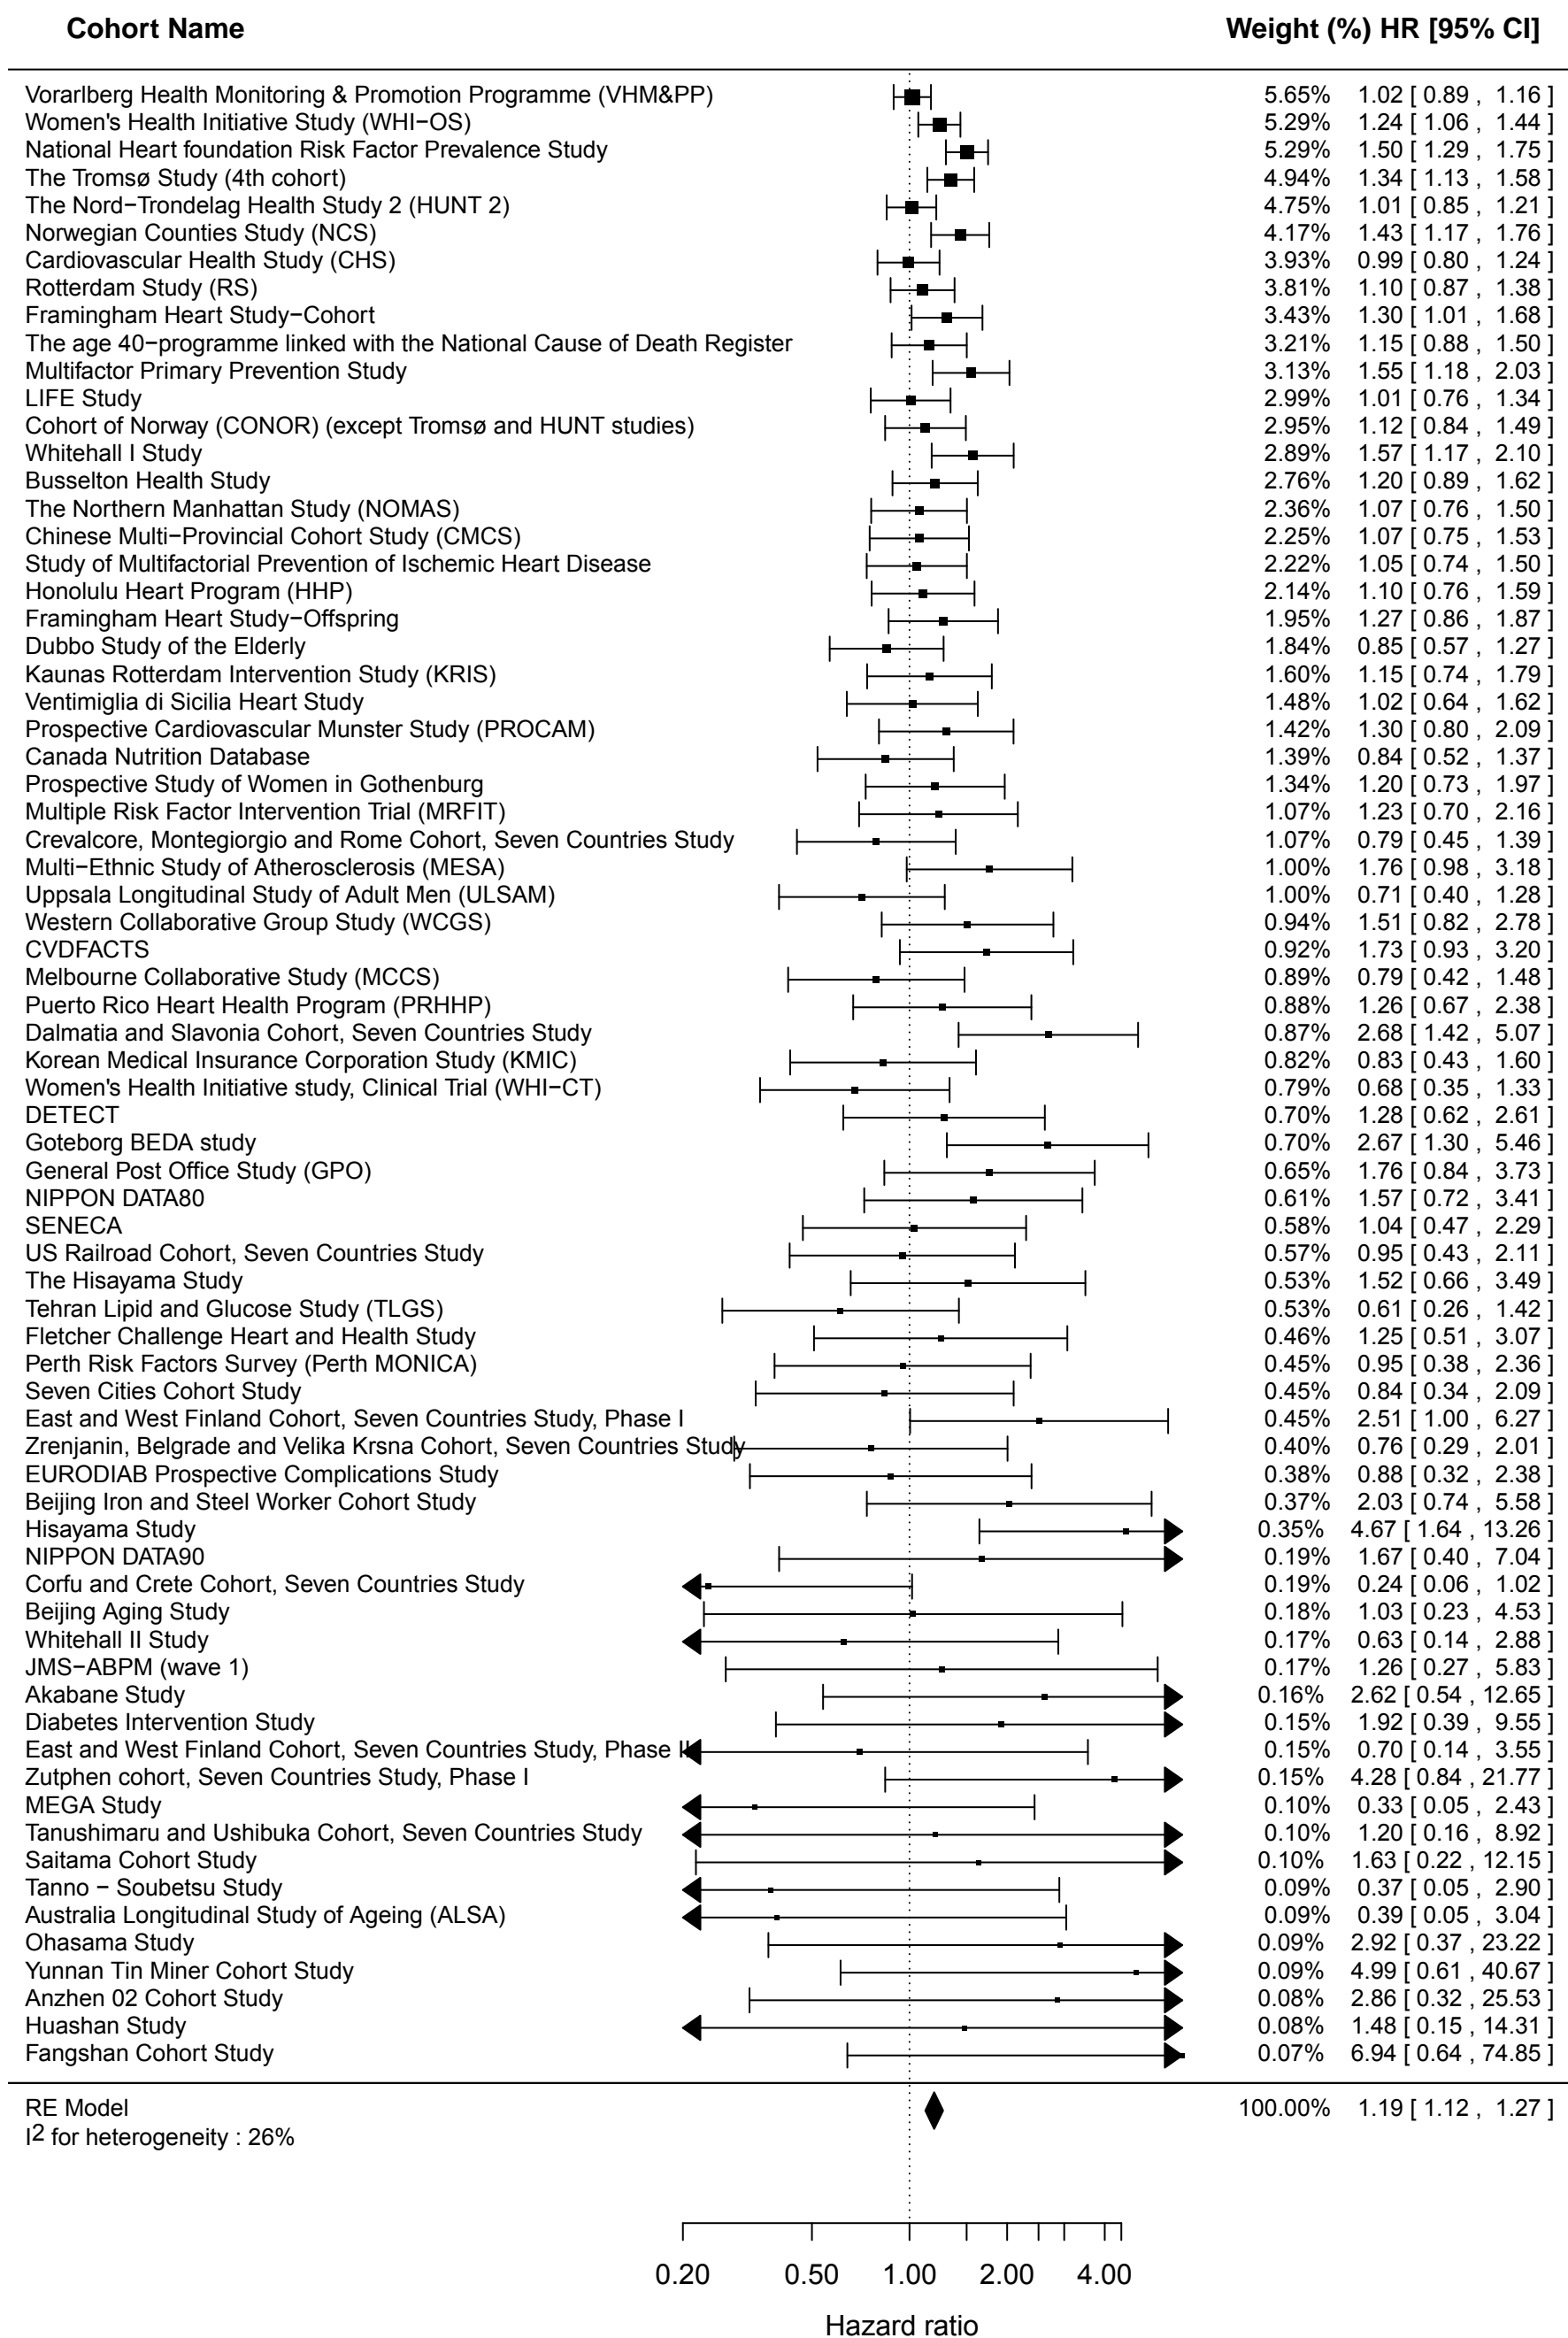

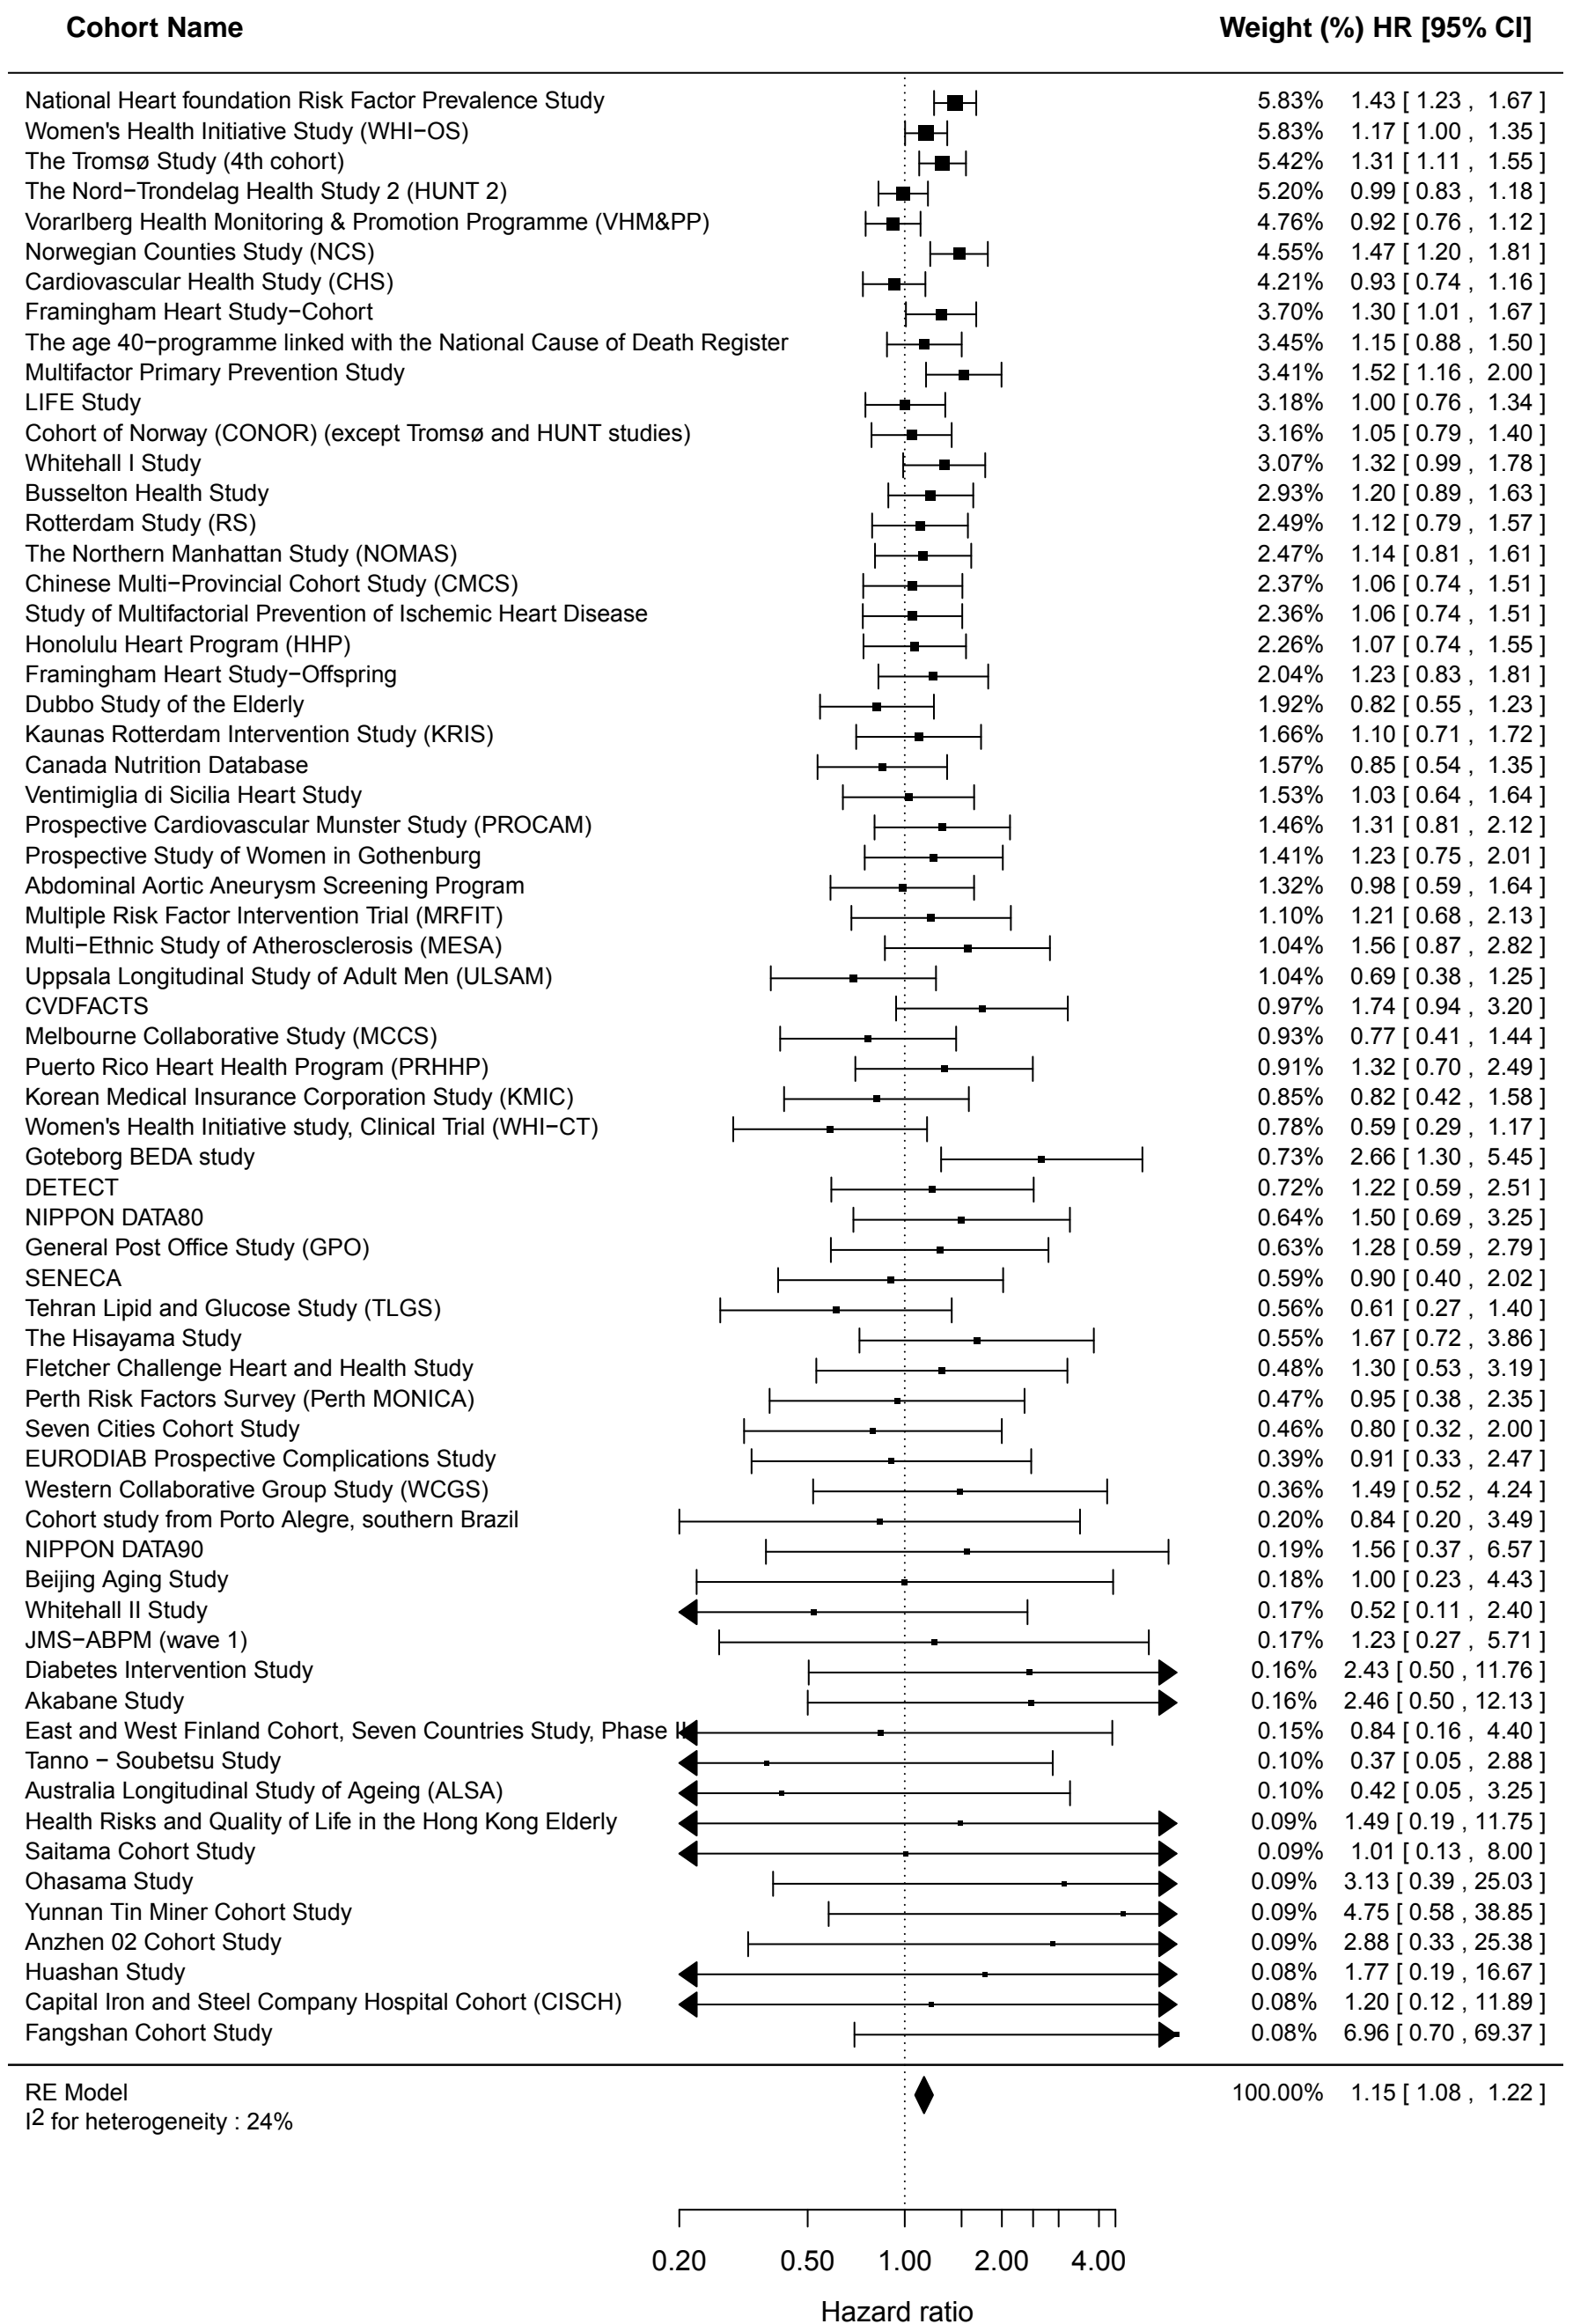

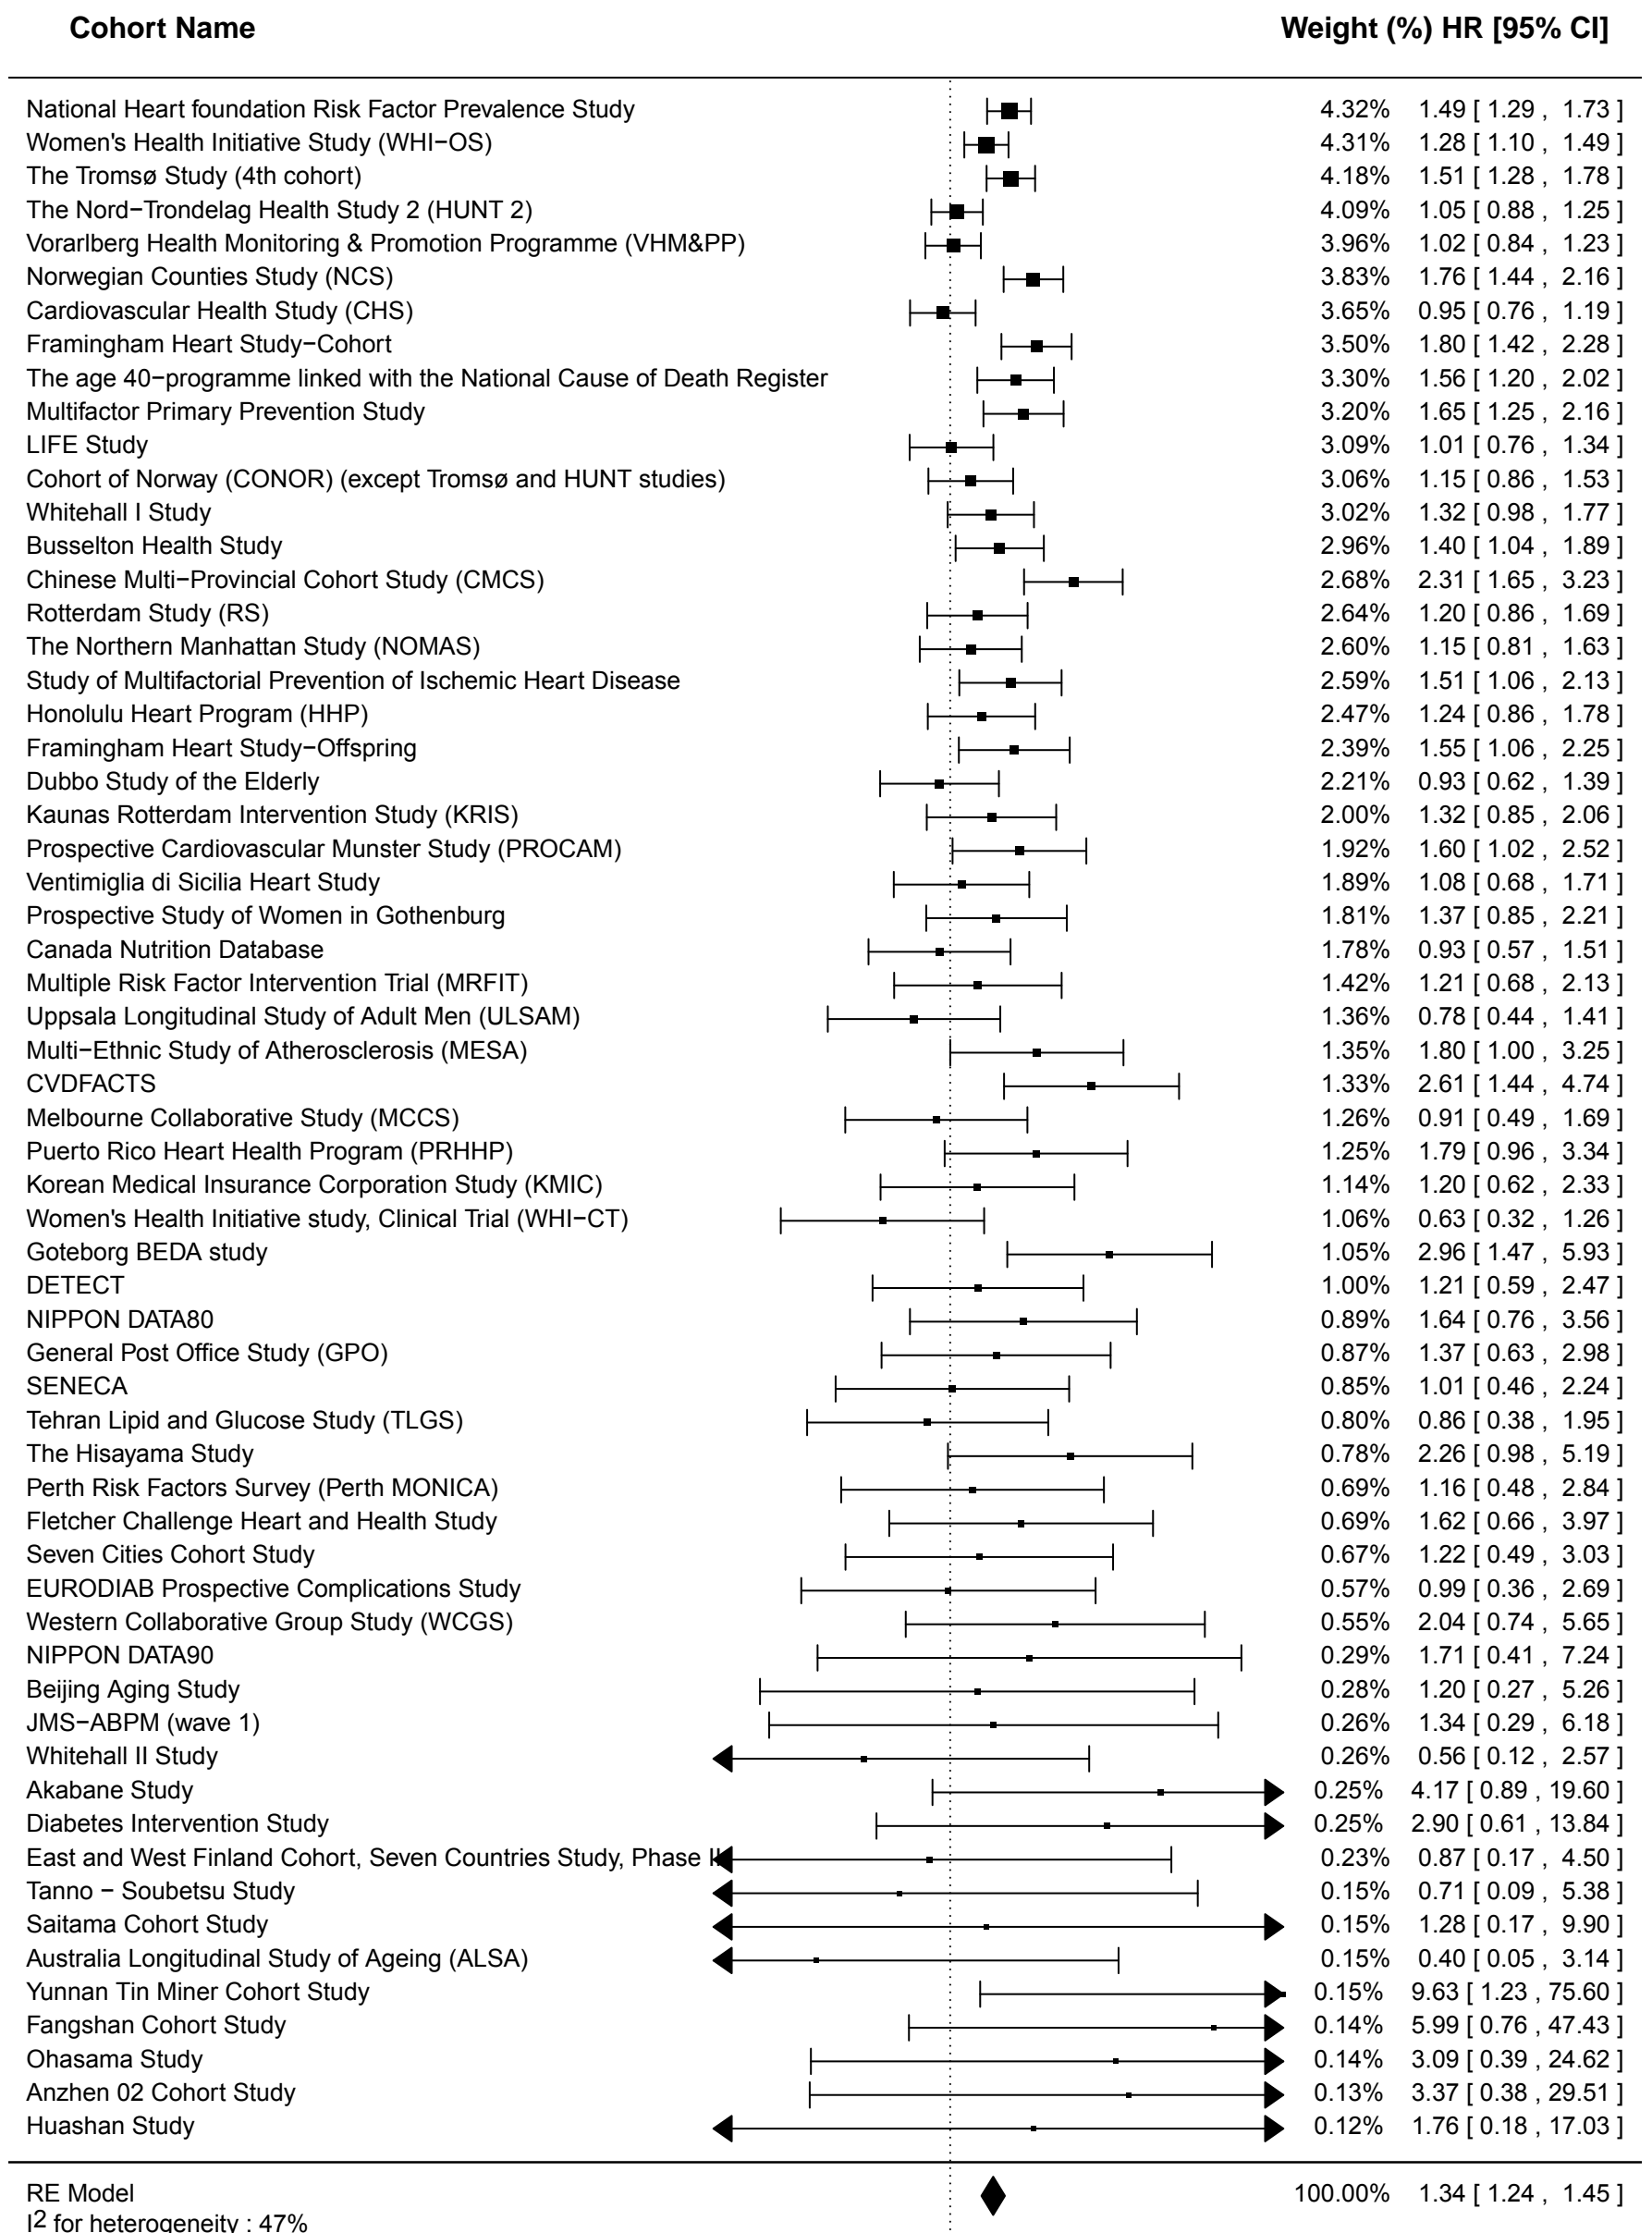



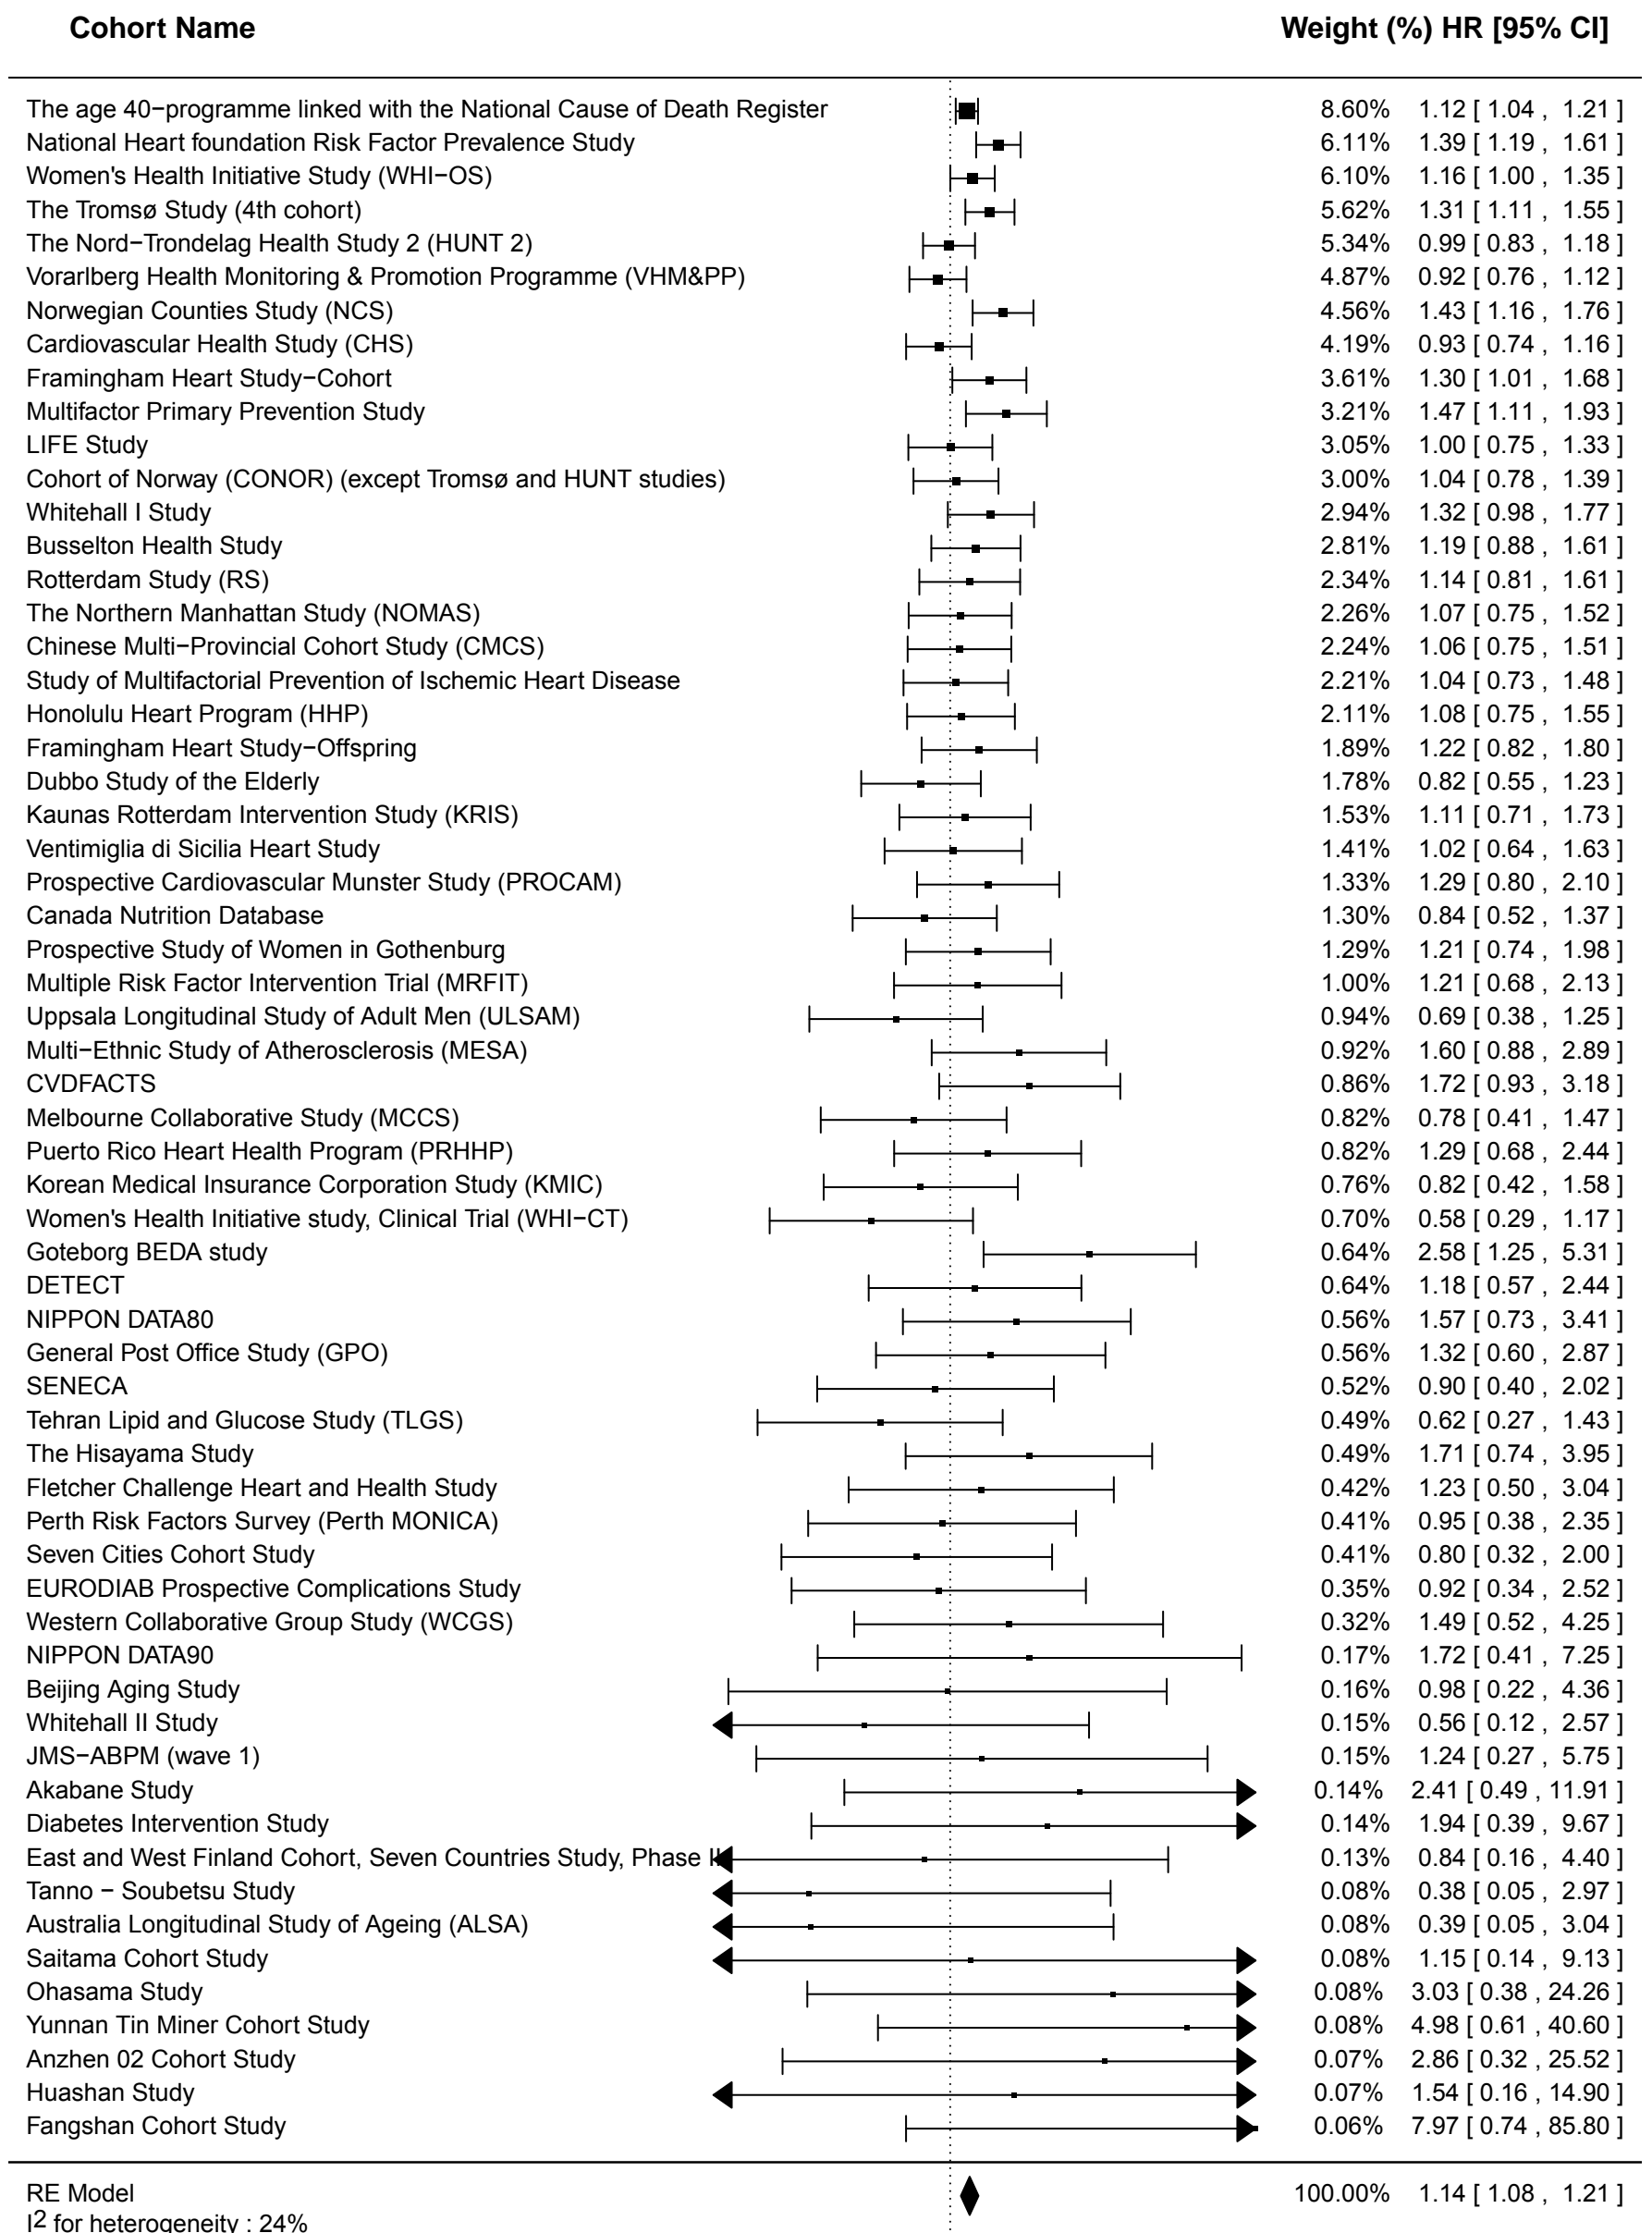

**Webfigure :** Stratified analyses of hazard ratios (HRs) of CHD per 5 kg/m<sup>2</sup> higher BMI (P values were meta-regression P values between groups)

## A. Adjusted for confounders

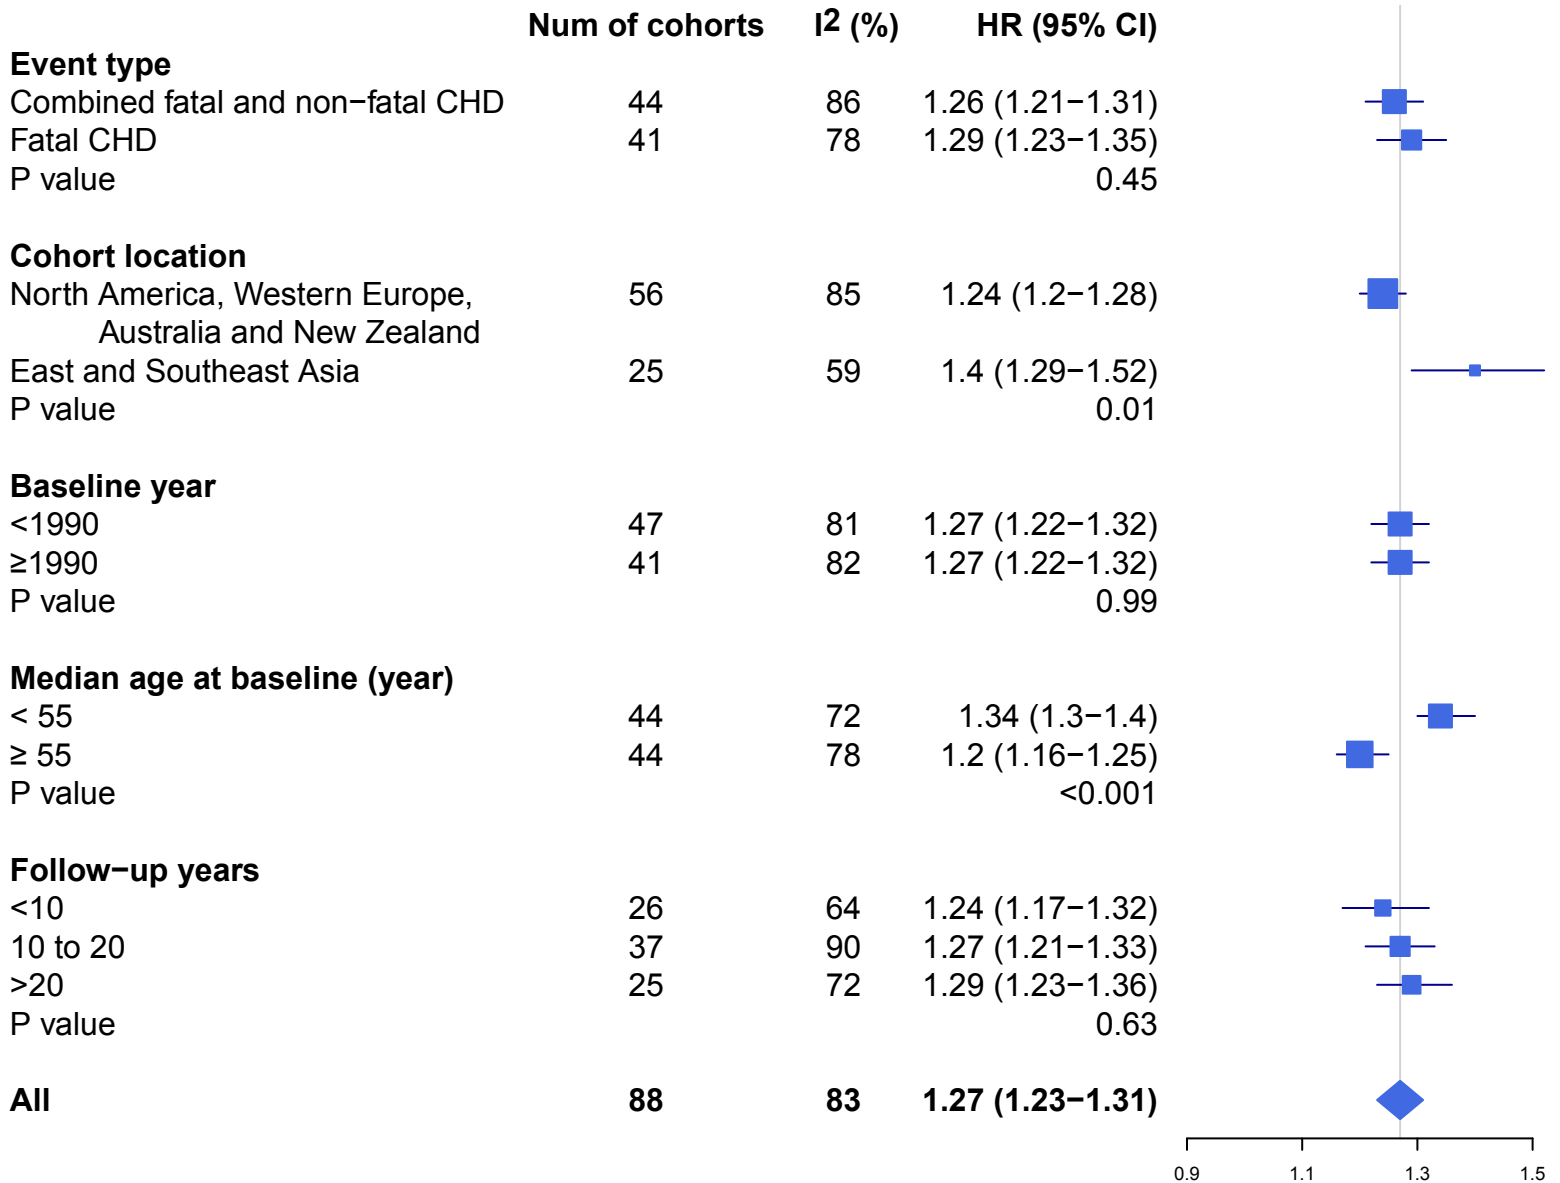

## B. Adjusted for confounders and blood pressure

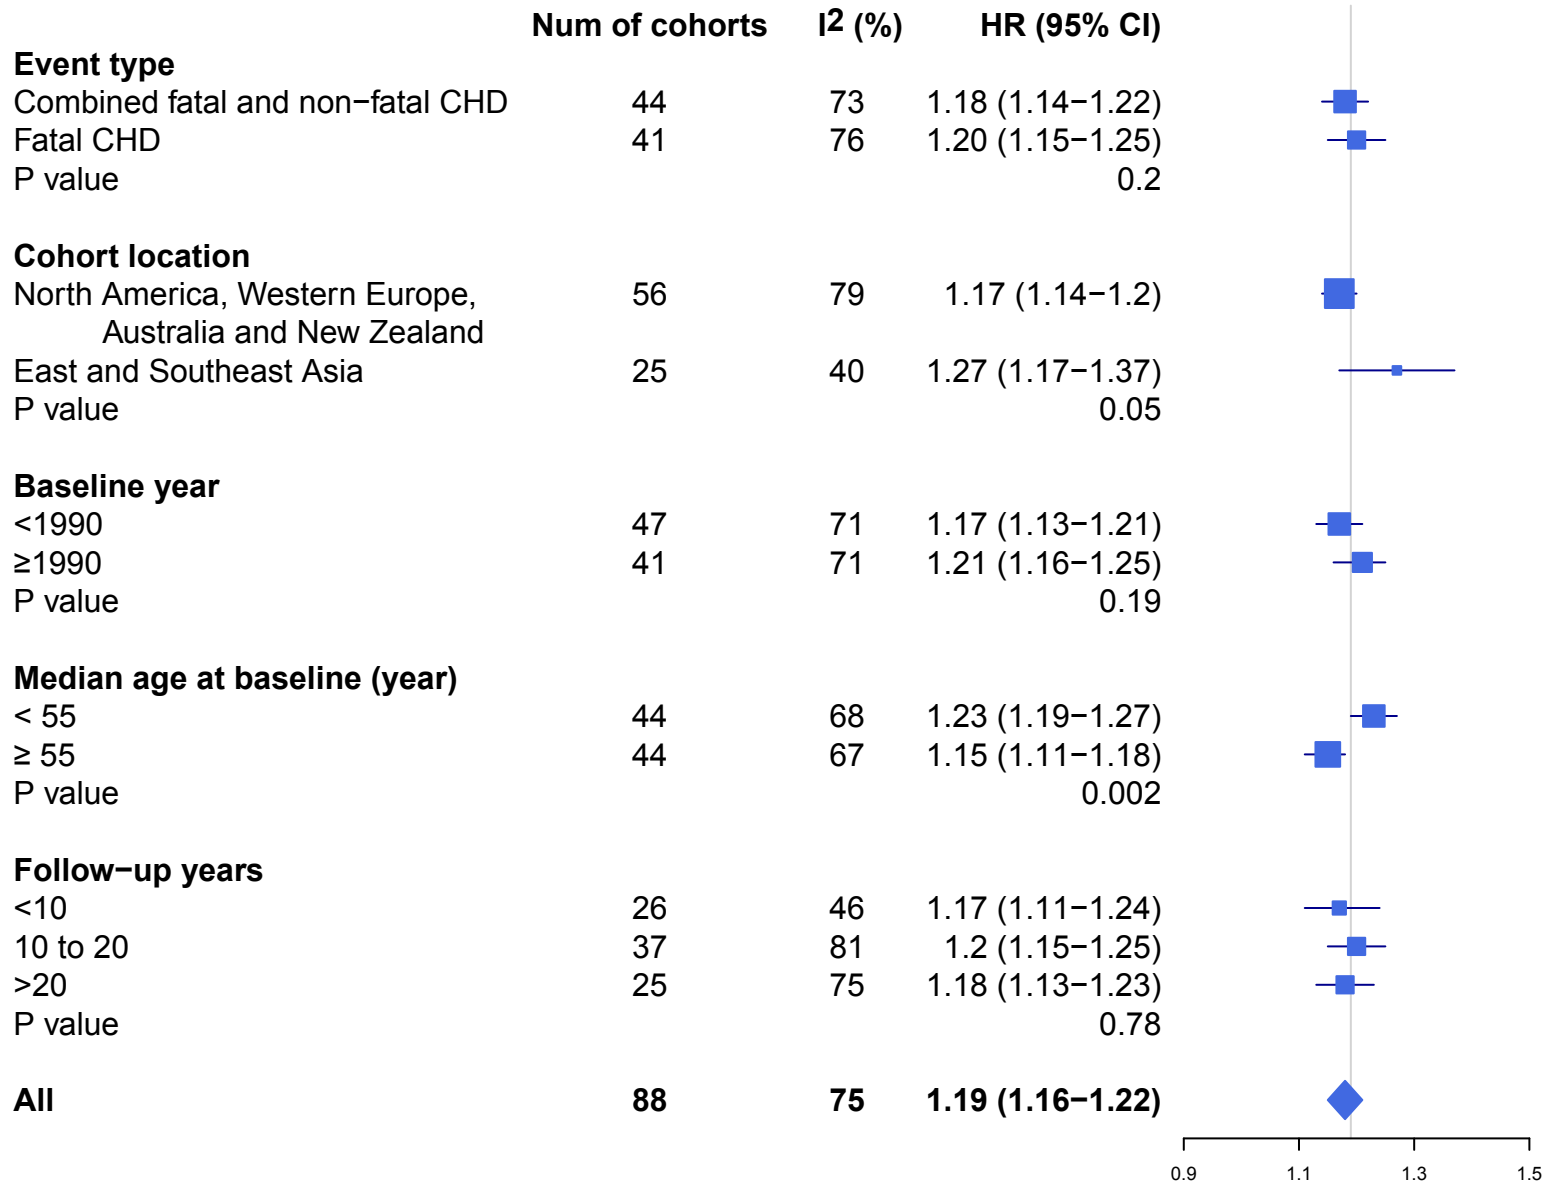

### C. Adjusted for confounders and cholesterol

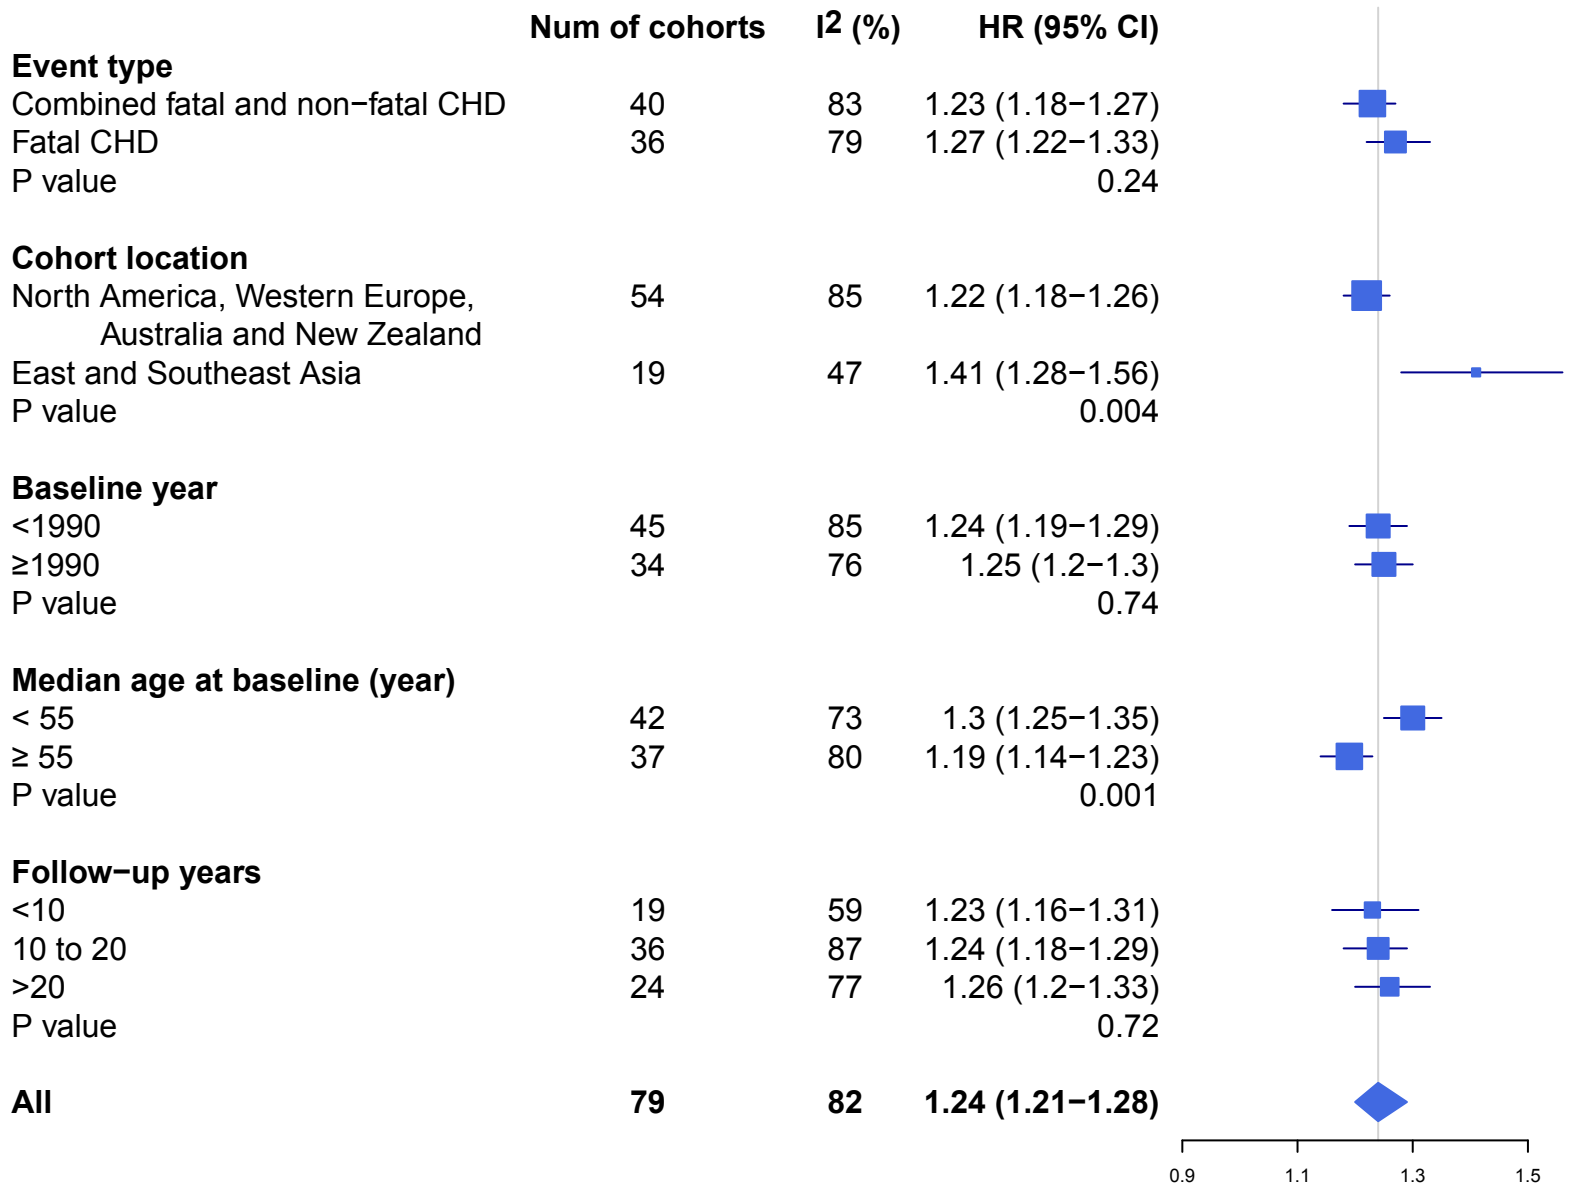

## D. Adjusted for confounders and glucose

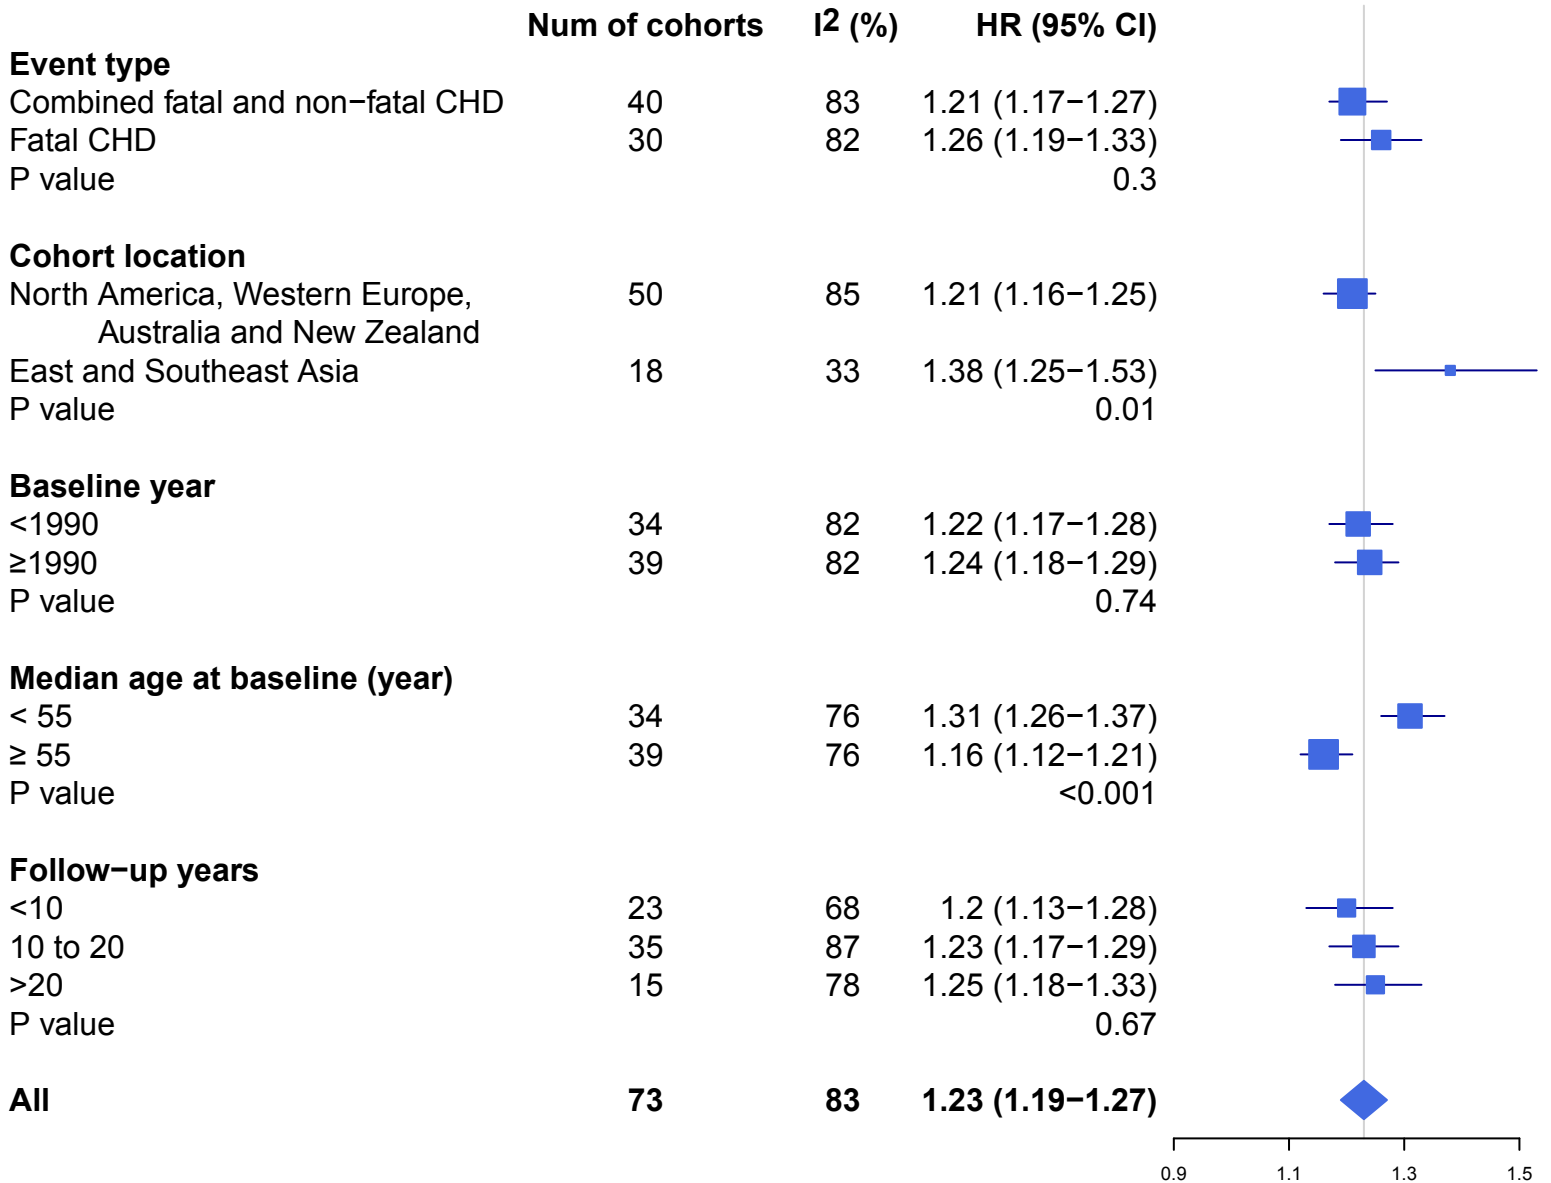

## E. Adjusted for confounders and blood pressure, cholesterol

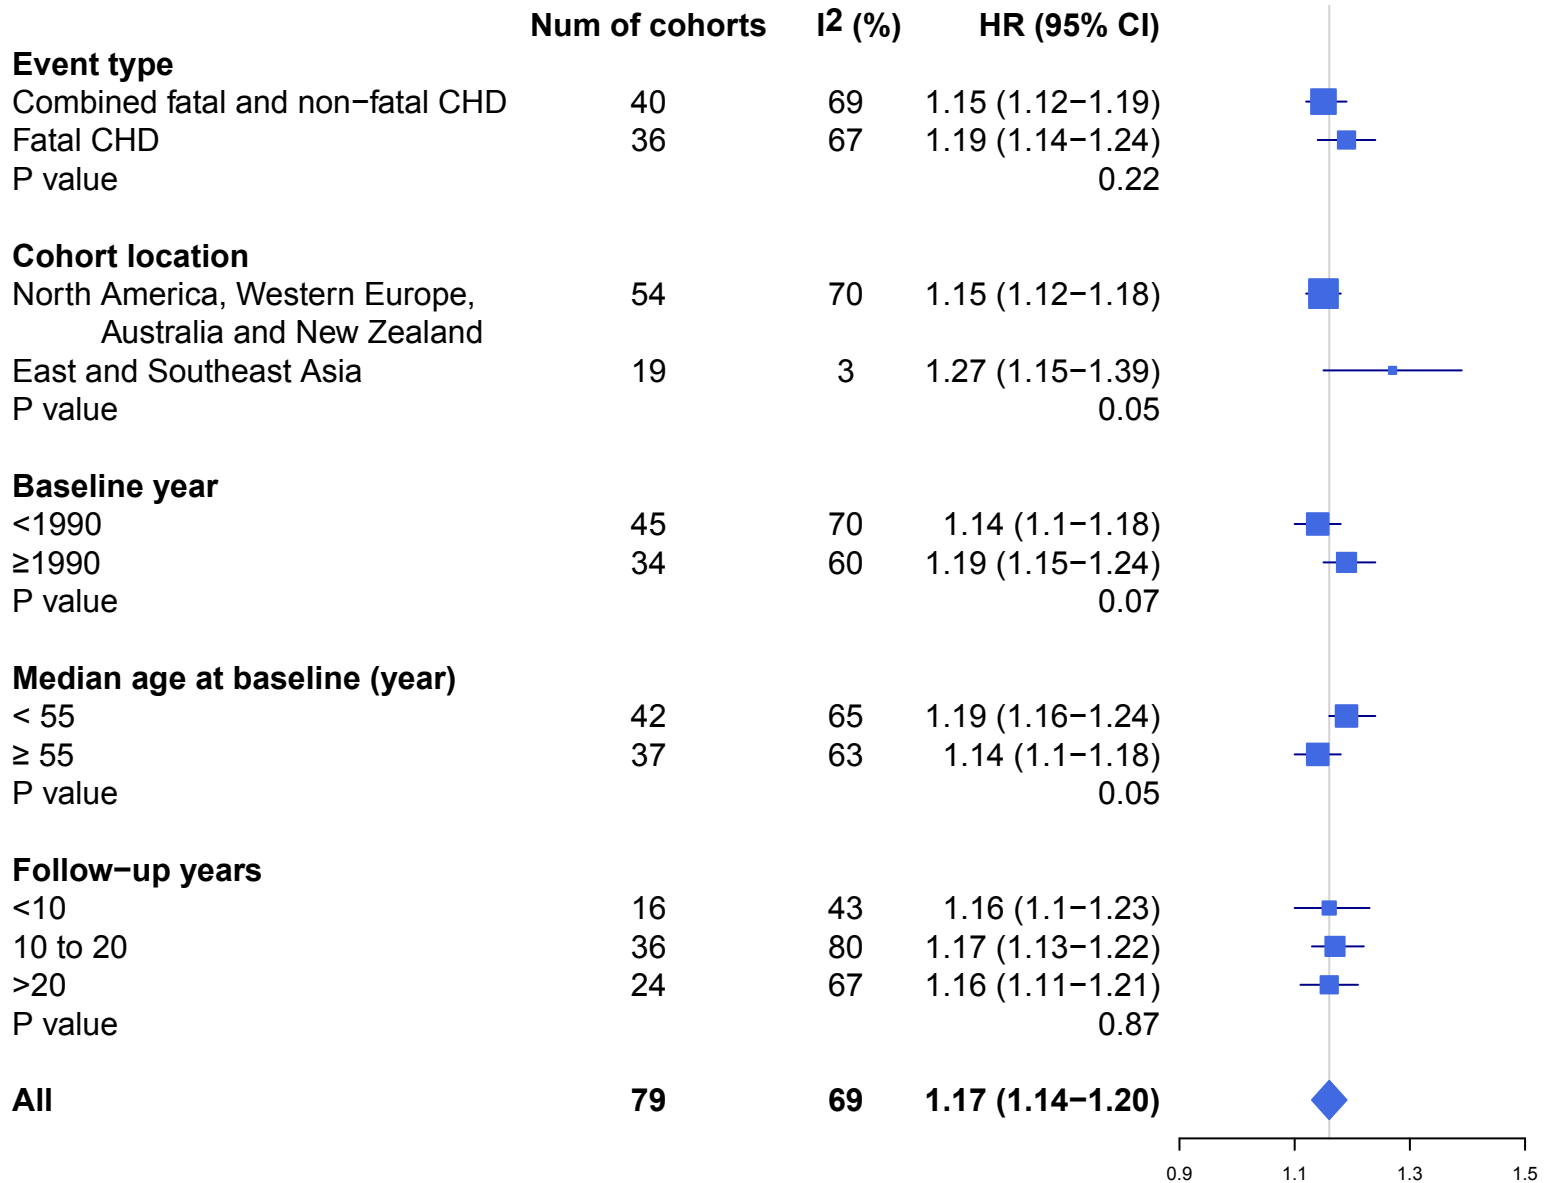

## F. Adjusted for confounders and blood pressure, glucose

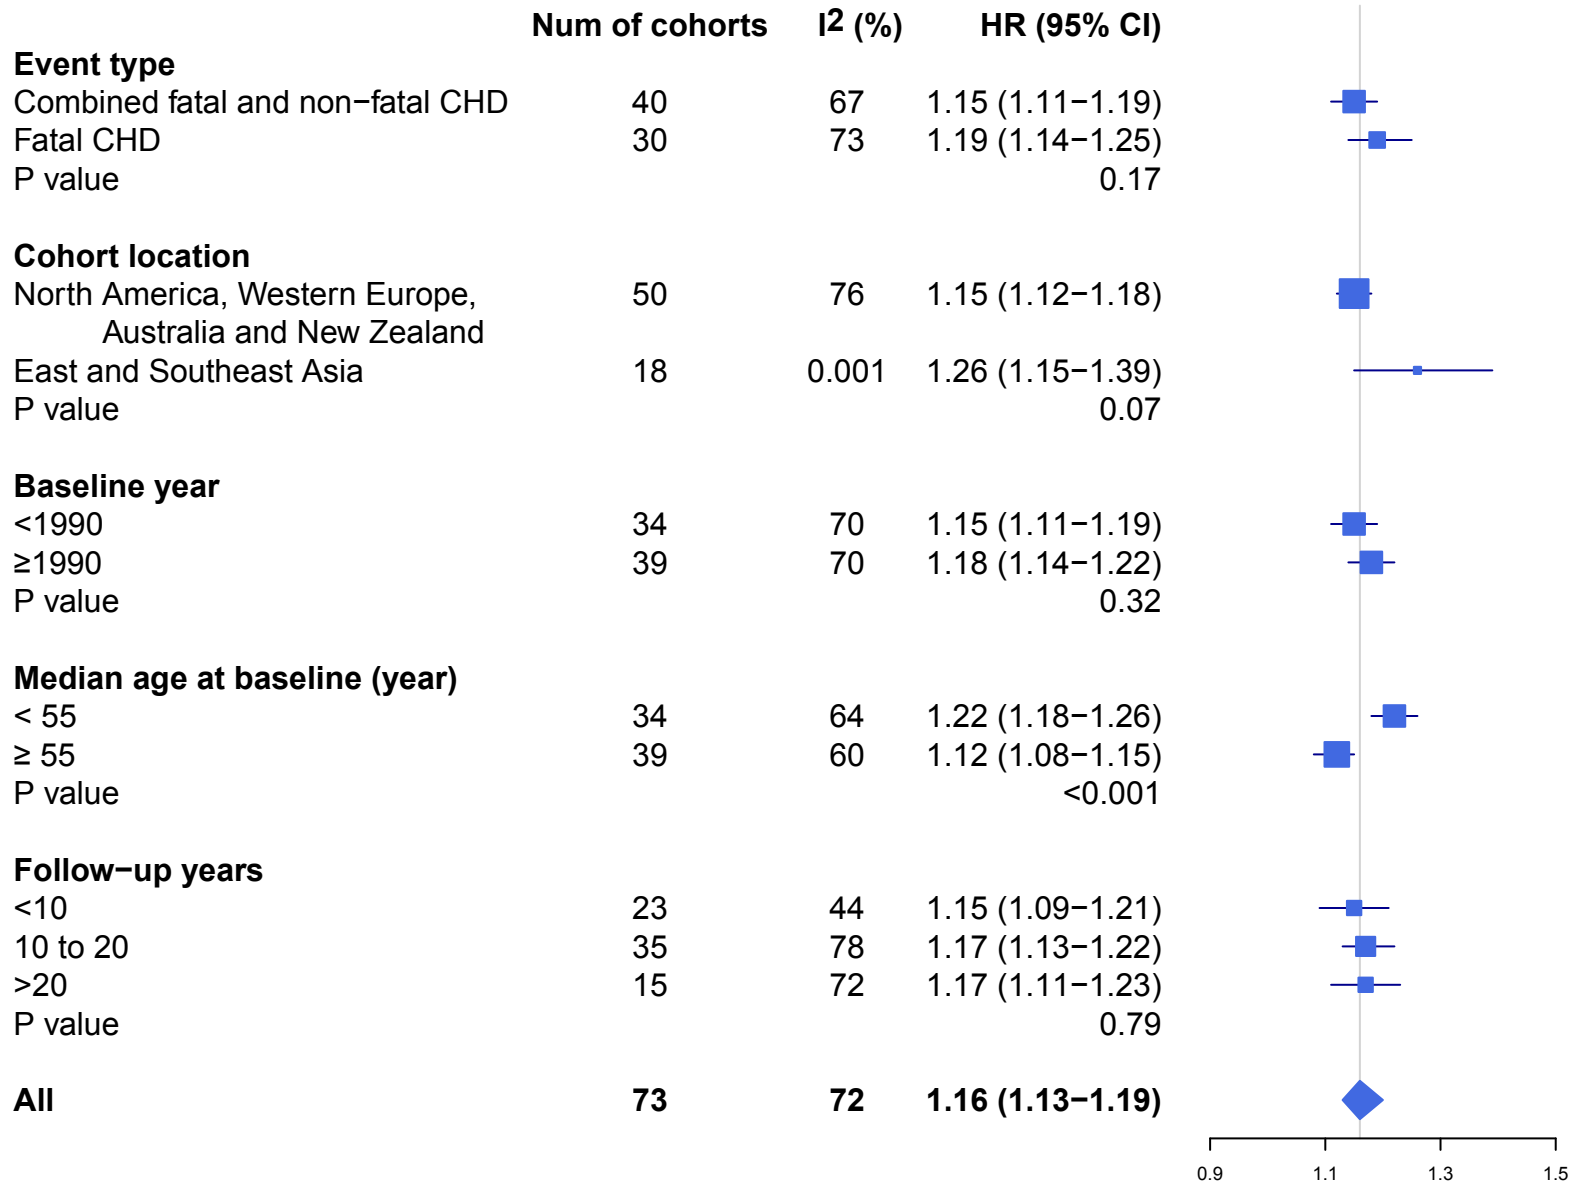



## G. Adjusted for confounders and cholesterol, glucose

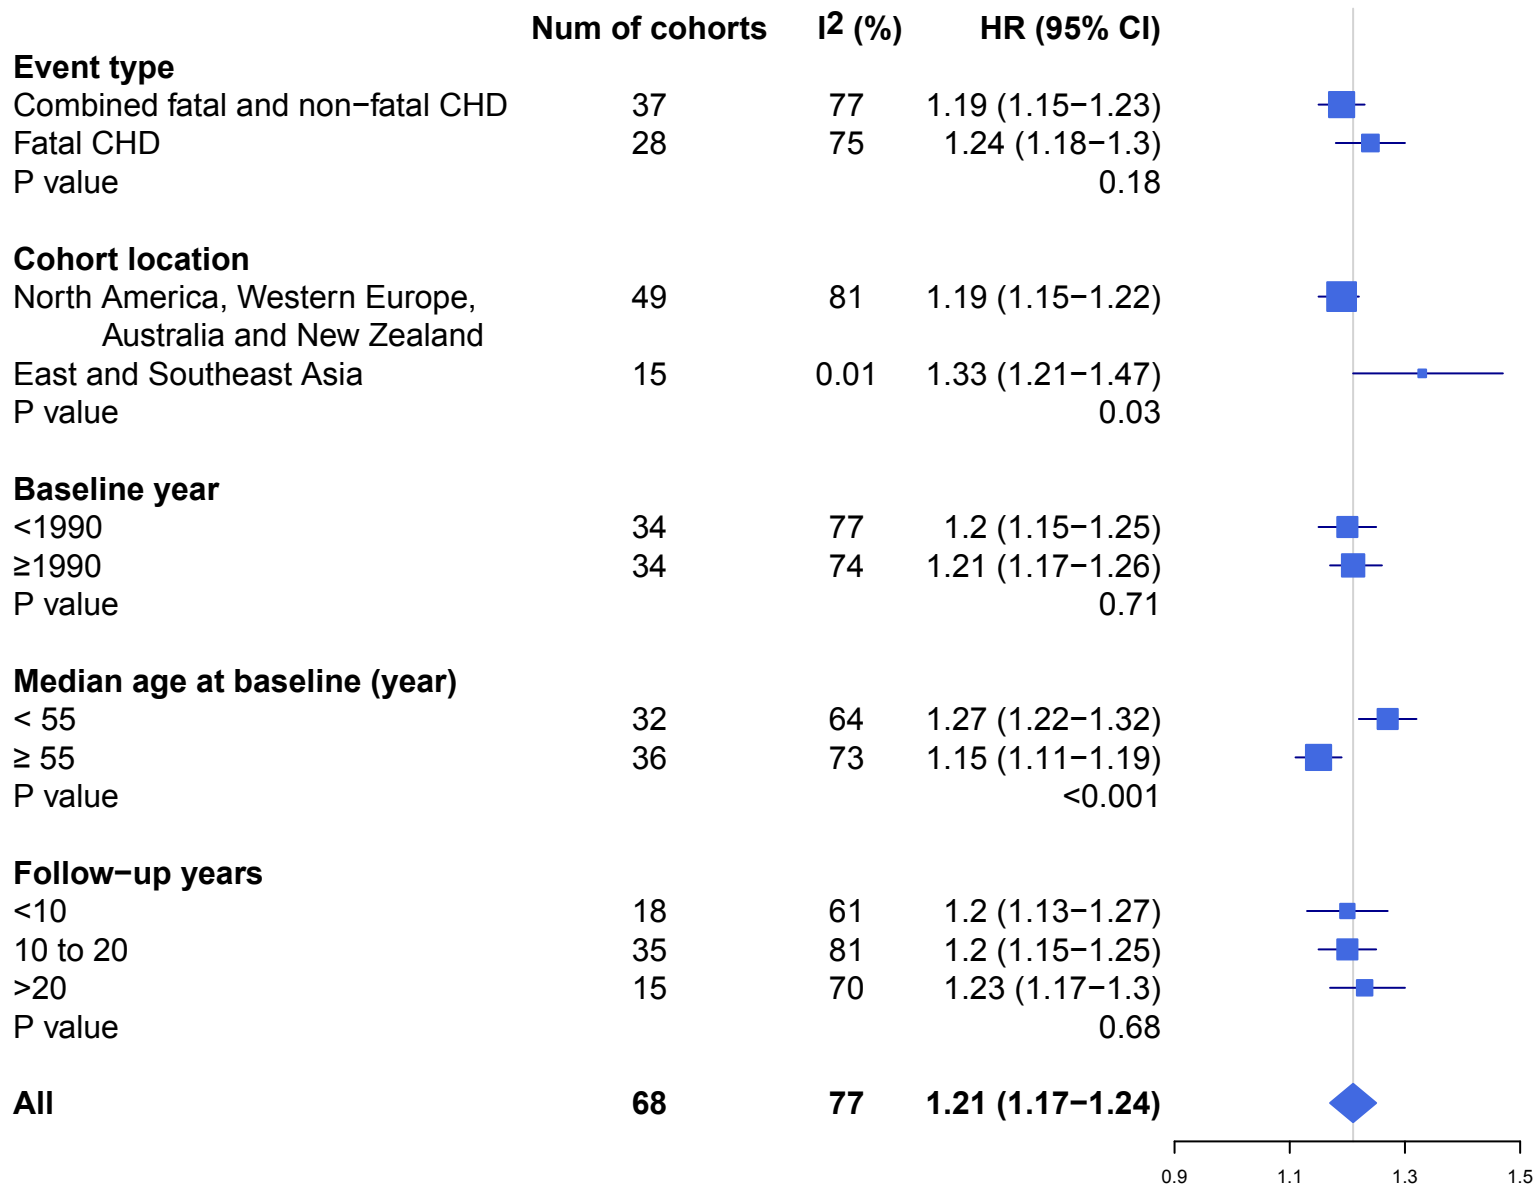

## H. Adjusted for confounders and blood pressure, cholesterol, glucose

81

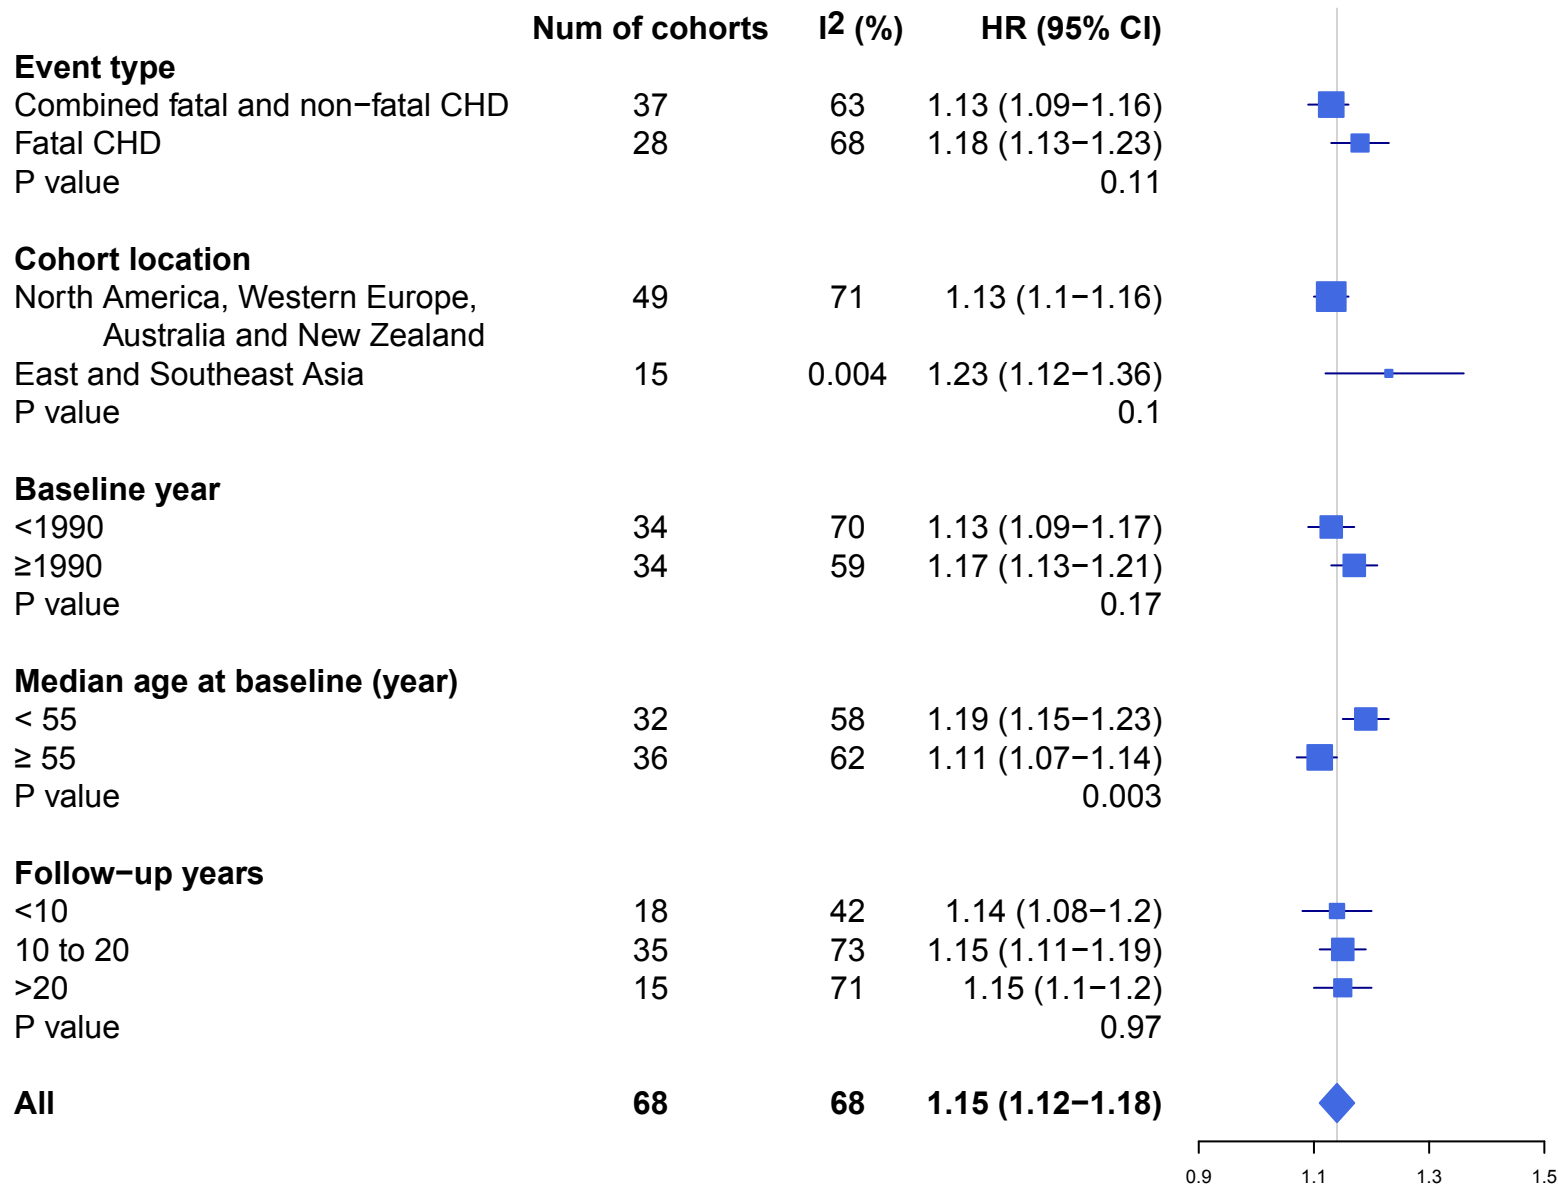

**Webfigure ;** : Stratified analyses of hazard ratios (HRs) of stroke per 5 kg/m<sup>2</sup> higher BMI (P values were meta-regression P values between groups)

## A. Adjusted for confounders

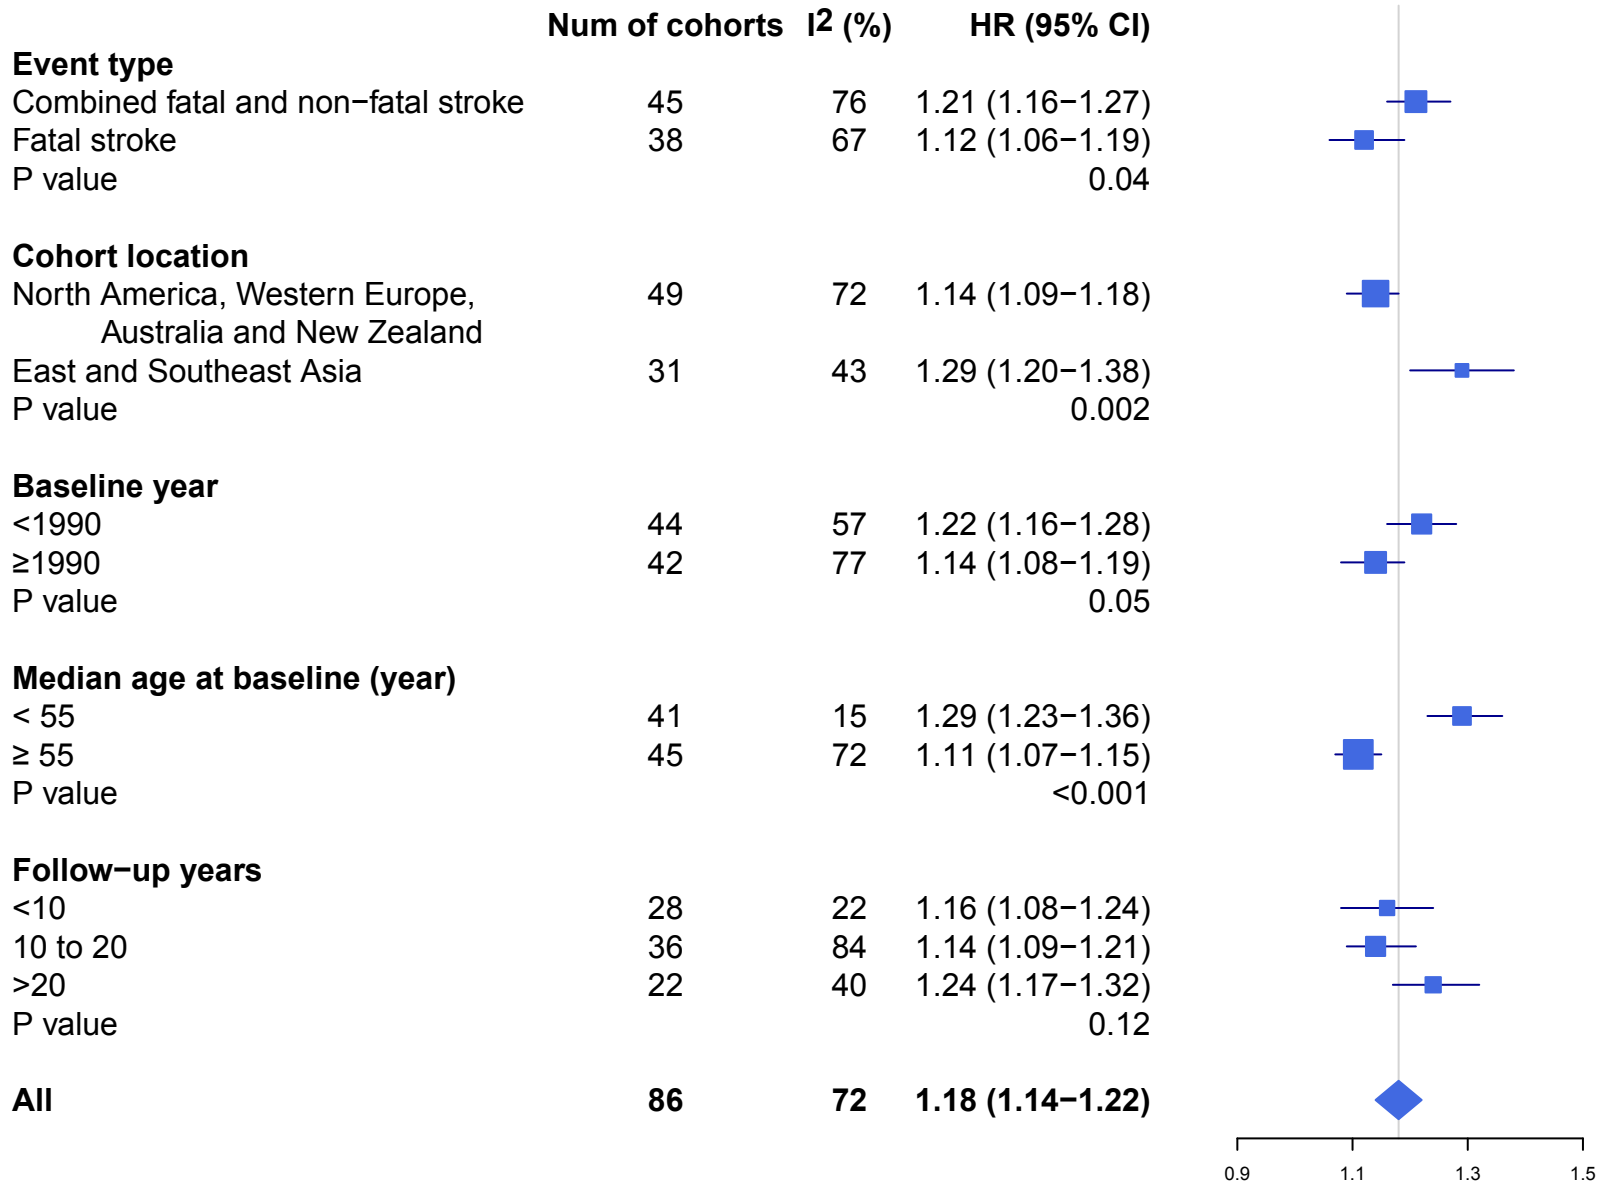

## B. Adjusted for confounders and blood pressure

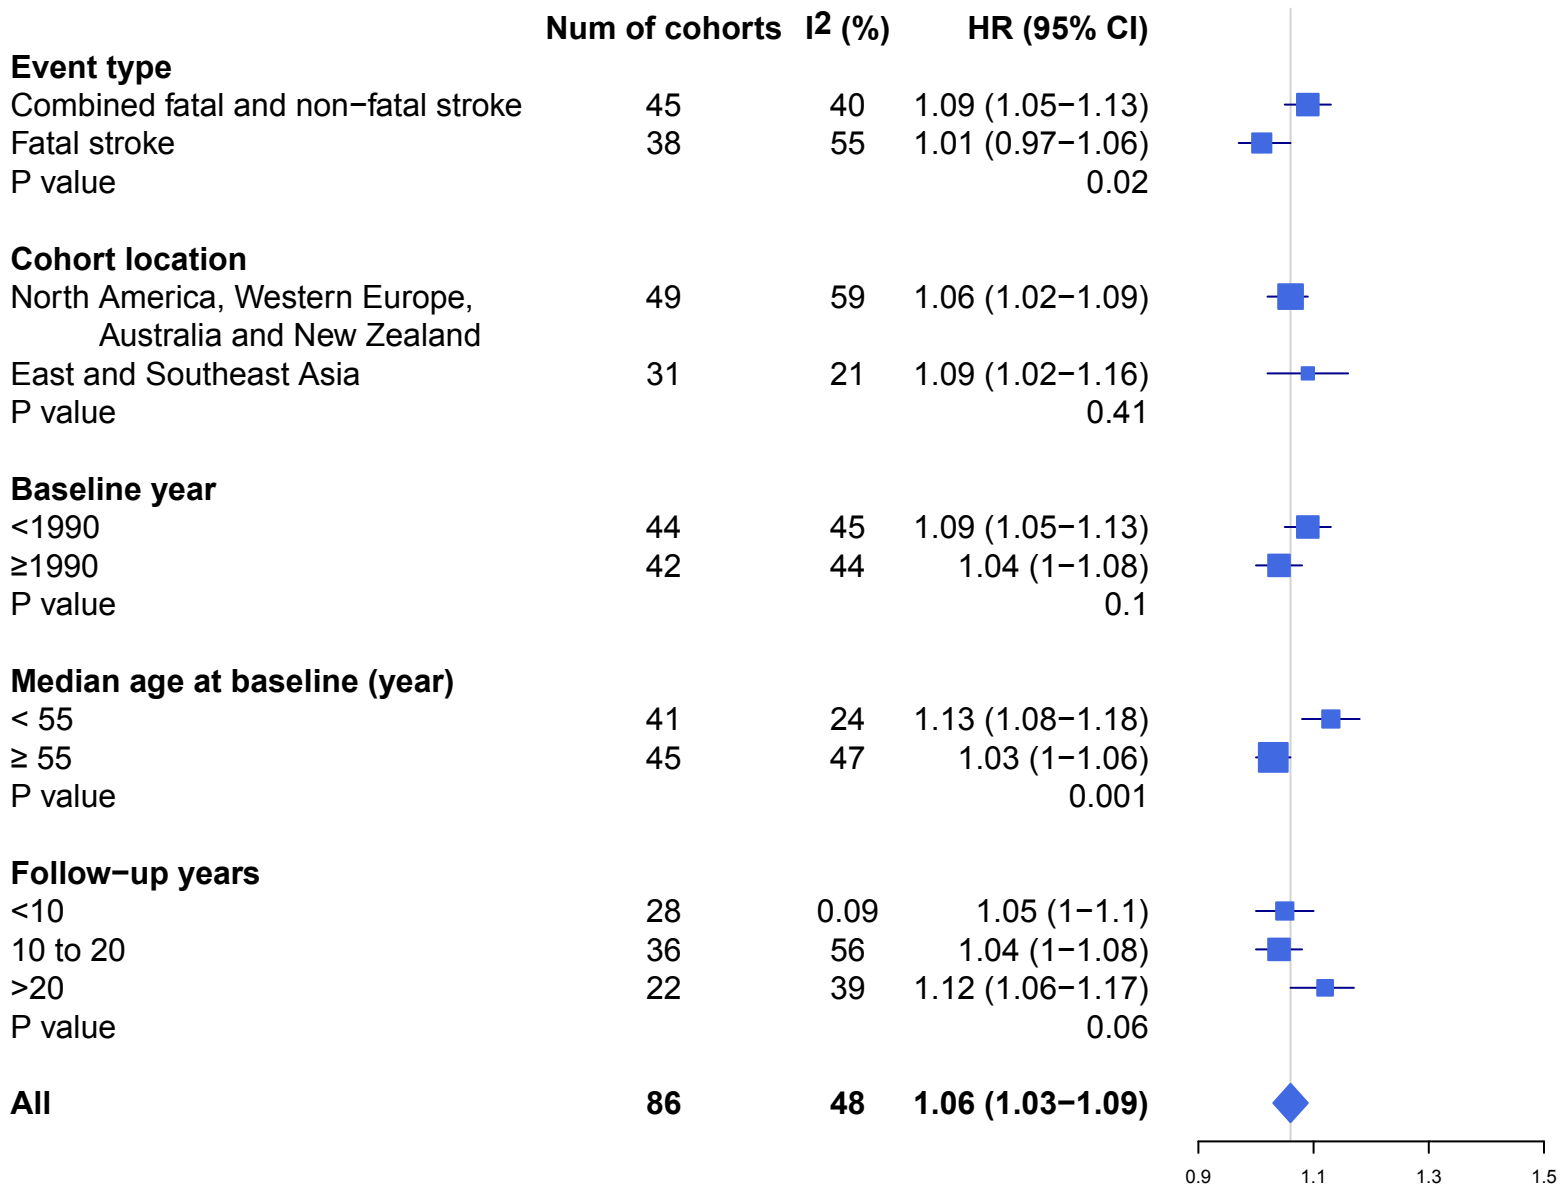

### C. Adjusted for confounders and cholesterol

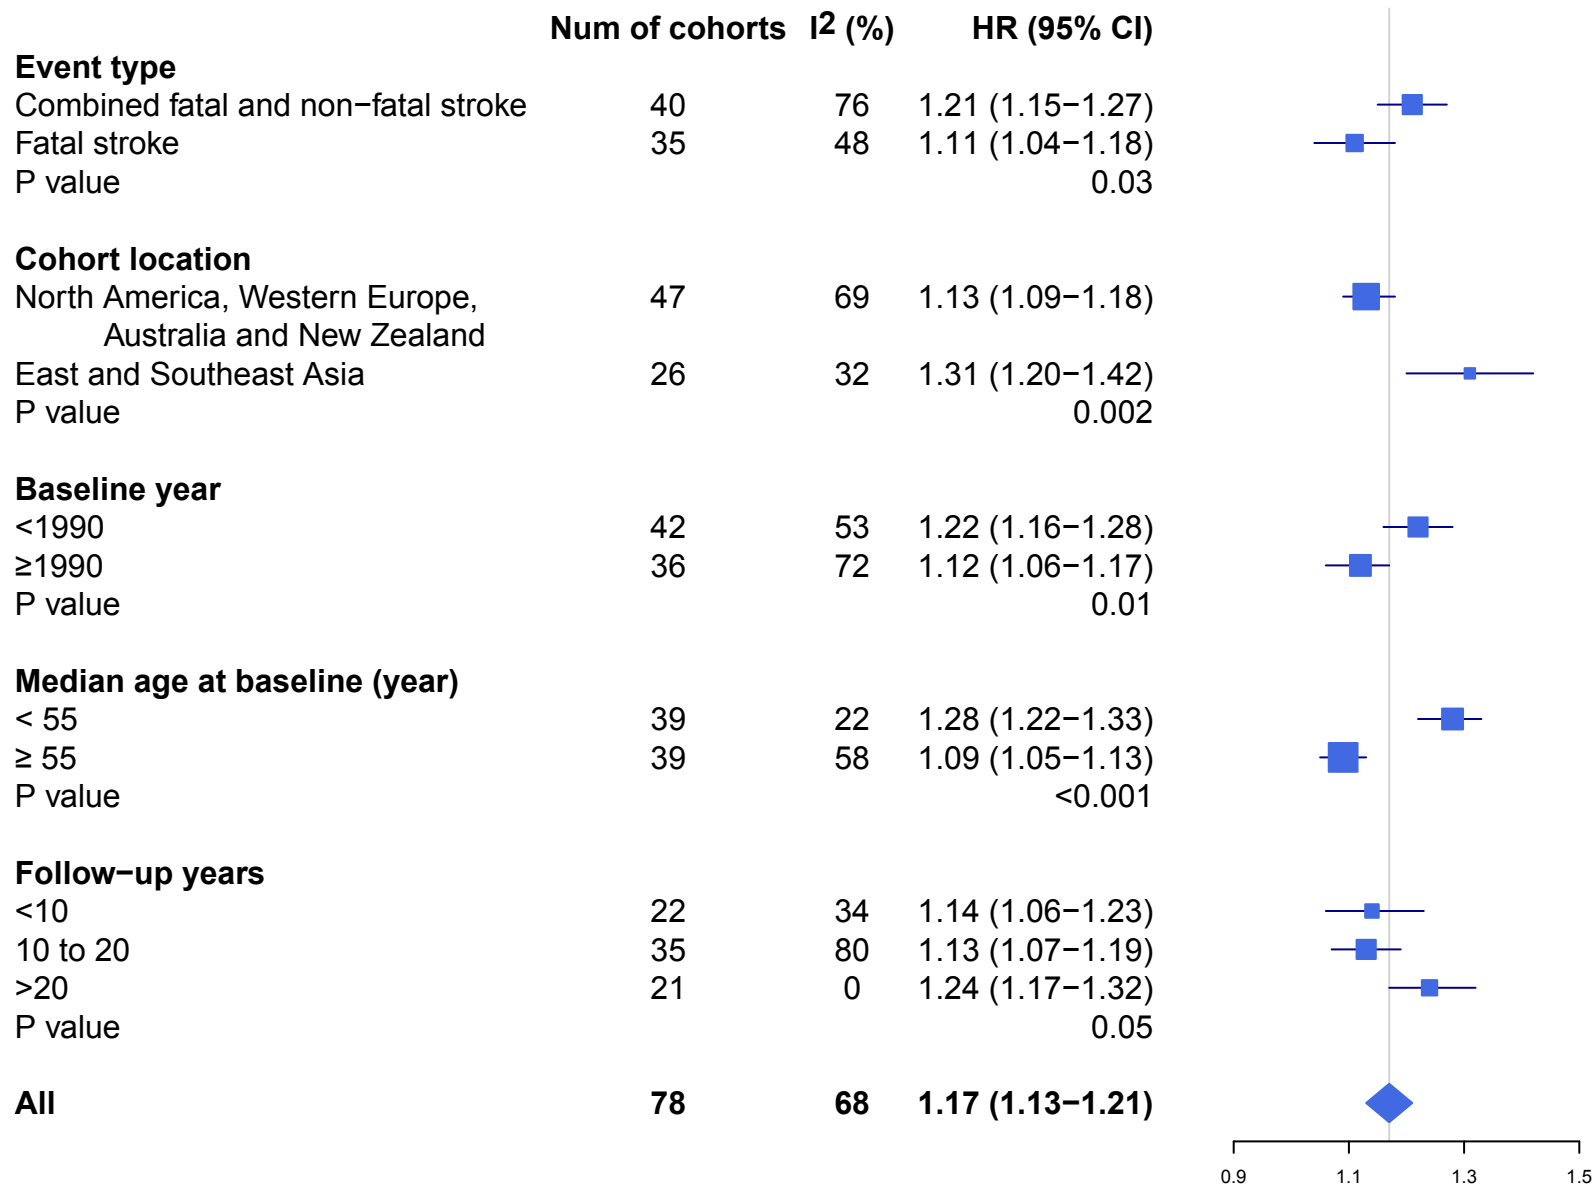

## D. Adjusted for confounders and glucose

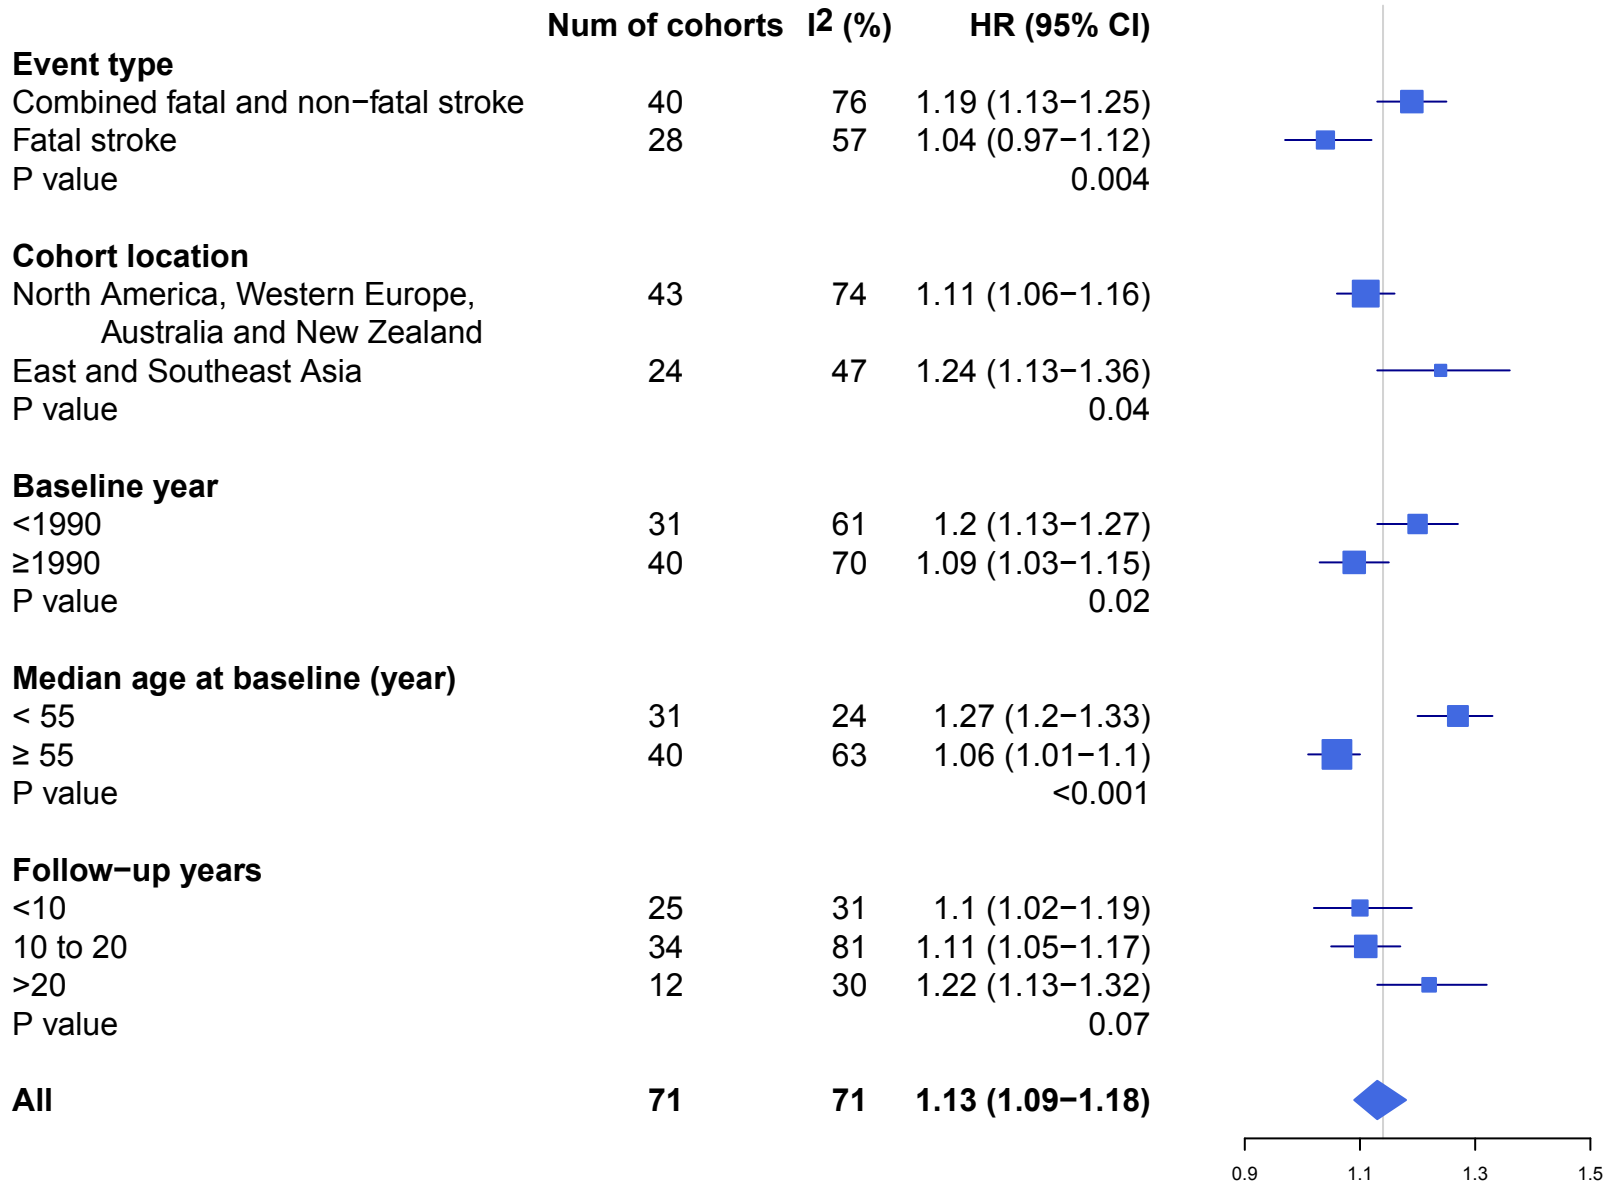

## E. Adjusted for confounders and blood pressure, cholesterol

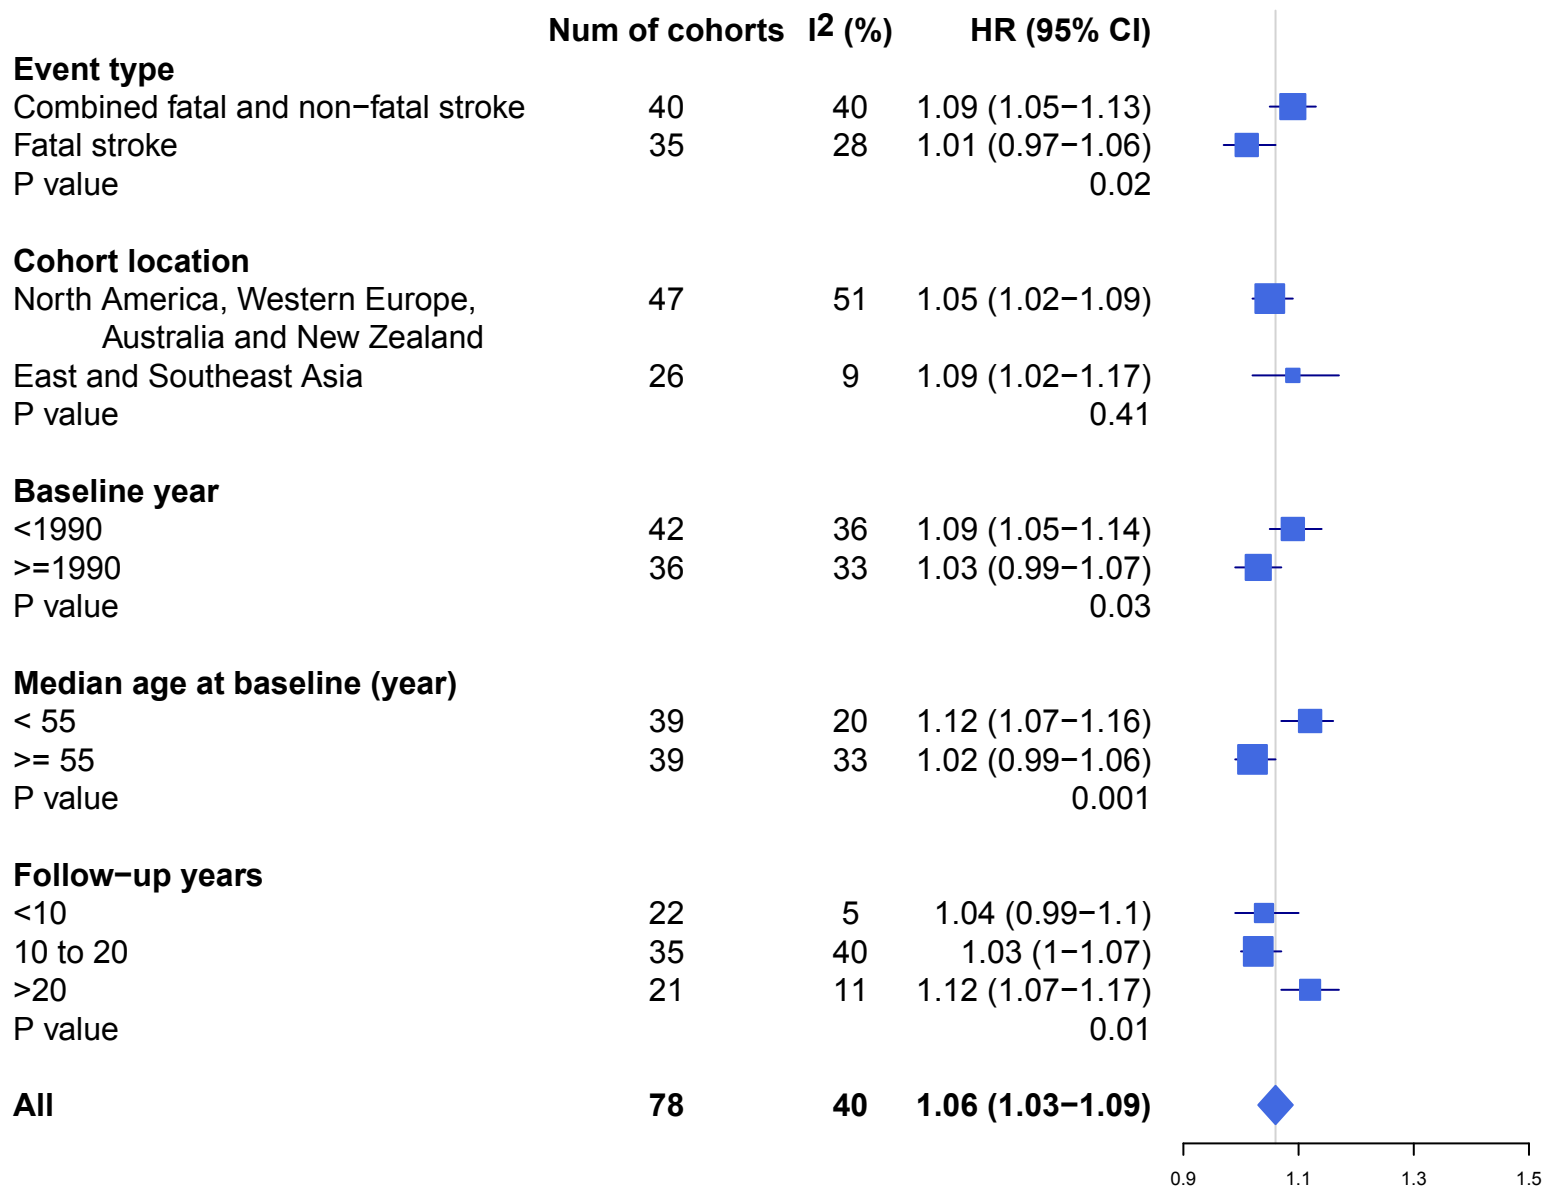



## F. Adjusted for confounders and blood pressure, glucose

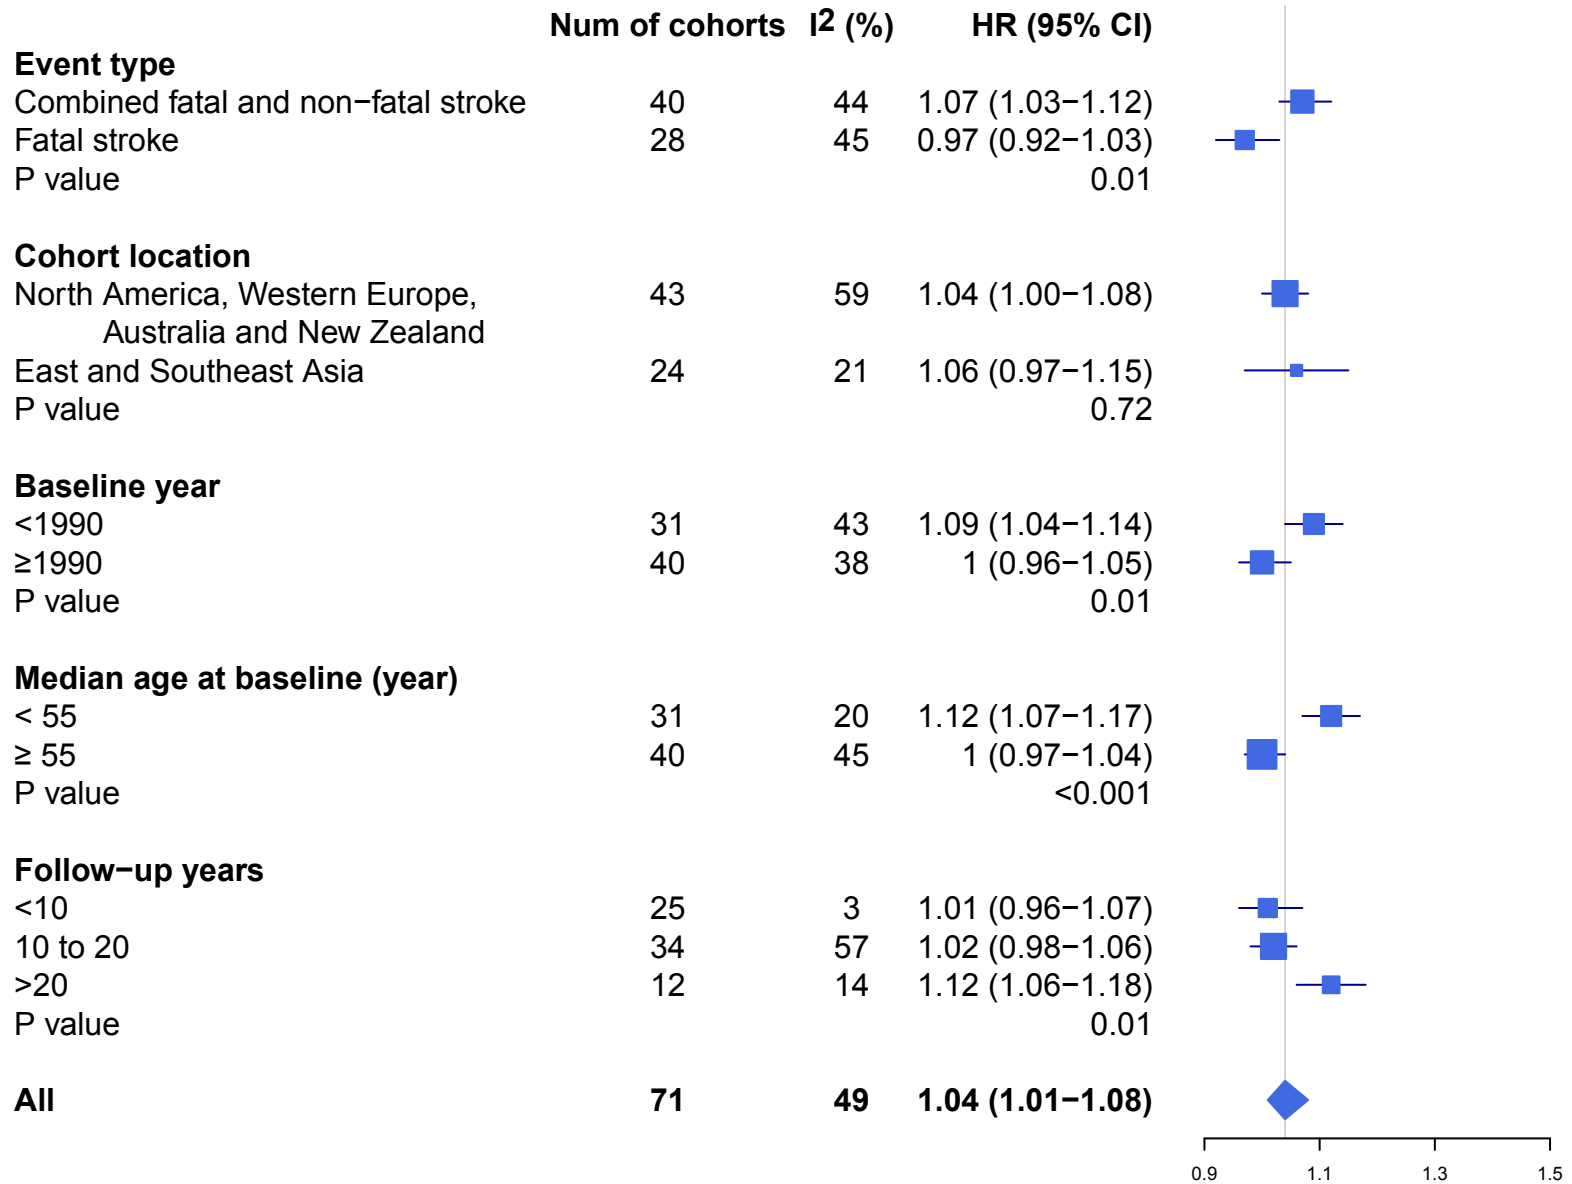

## G. Adjusted for confounders and cholesterol, glucose

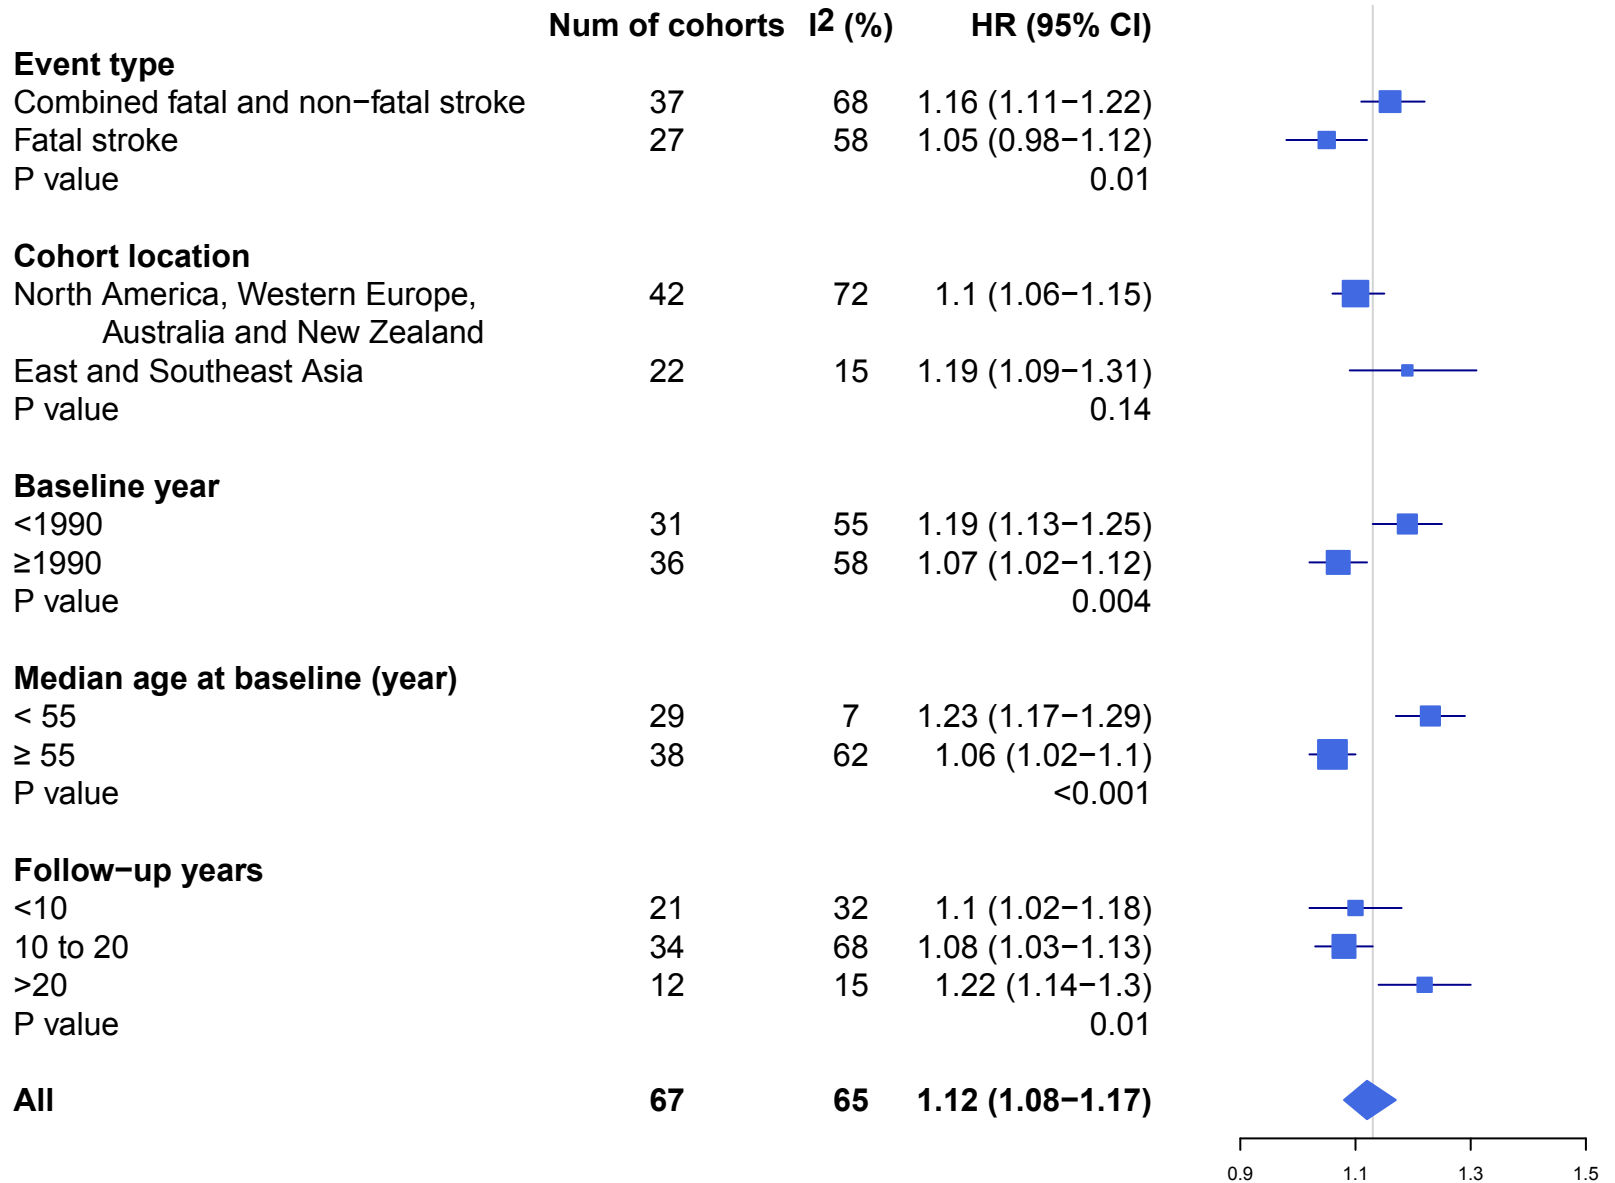

## H. Adjusted for confounders and blood pressure, cholesterol, glucose

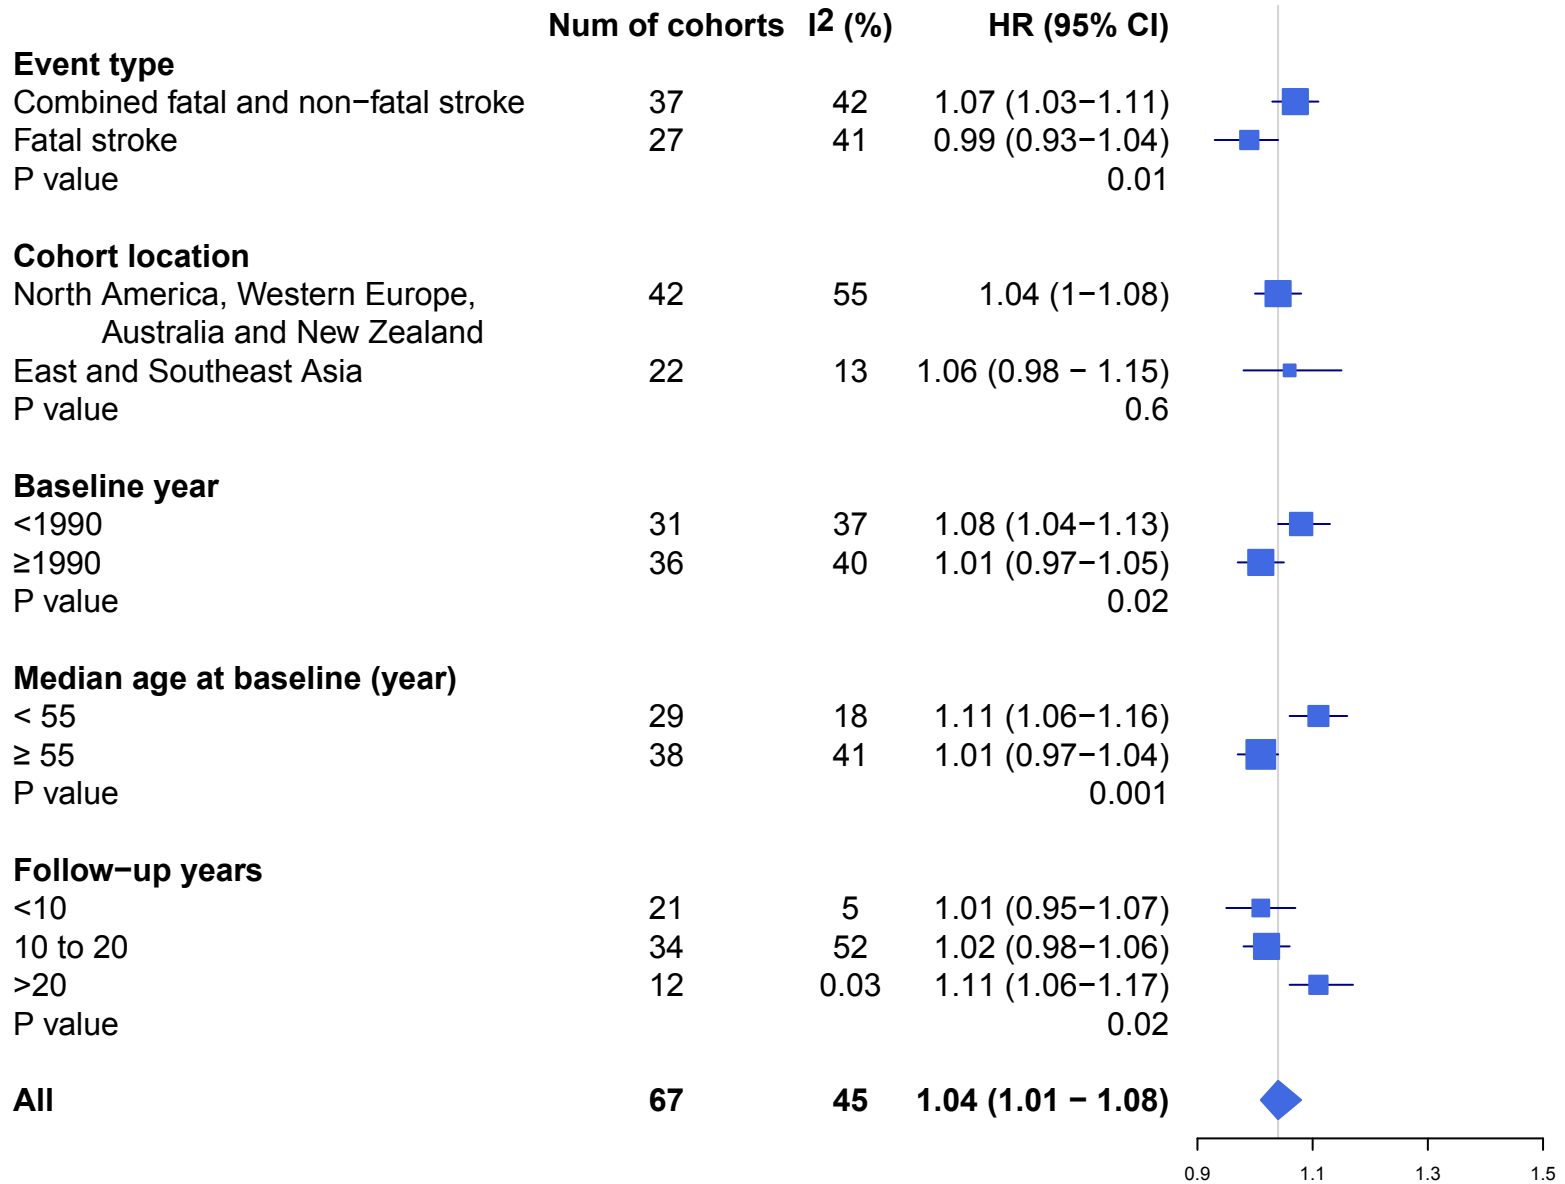

Supplement: mmc1.pdf [file mmc1.pdf]
